# Supplementary material for: Development and Characterization of SSR Markers in the Gossypium Barbadense Genome
Source: Research Square preprint supplement (doi:10.21203/rs.3.rs-870780/v1), 2021-09-14
Supplement: Supplementary file 1 [file 96acab066c4827bdf0640f74.xlsx]

## Sheet: Sheet1
Table S6 GO and KEGG enrichment of genes containing SSR markers
Chromosome	Scaffold	SSR_Type	SSR_Sequence	SSR_Start	Xinhai21 Gene ID	Gene Start	Gene End	Strand	GO_ID	GO_Information	PathwayID	Pathway	KEGG_Ontology	Primers_with_One_Product	Primers_with_Two_Products	Primers_with_Three_Products	Primers_with_>3_Products
At01	At_S1428	p2	TATATATATATATATATATA	28050	GOBAR_AA40654	21363	29108	+	GO:0003824|GO:0005978|GO:0008878|GO:0009058|GO:0016779|	catalytic activity|glycogen biosynthetic process|glucose-1-phosphate adenylyltransferase activity|biosynthetic process|nucleotidyltransferase activity|	ko00500|ko00520|	Starch and sucrose metabolism |Amino sugar and nucleotide sugar metabolism |	K00975	-	At_S1428_28050_1;At_S1428_28050_2;At_S1428_28050_3;	-	-
At01	At_S0534	p6	TTTTTCTTTTTCTTTTTC	40638	GOBAR_AA20983	40060	42088	+	GO:0003824|GO:0004553|GO:0005975|	catalytic activity|hydrolase activity, hydrolyzing O-glycosyl compounds|carbohydrate metabolic process|	-	-	-	-	-	At_S0534_40638_1;At_S0534_40638_2;At_S0534_40638_3;	-
At01	At_S0300	p3	TAATAATAATAATAATAATAATAA	40744	GOBAR_AA11682	39651	41071	+	GO:0003676|GO:0008270|	nucleic acid binding|zinc ion binding|	-	-	-	-	At_S0300_40744_1;At_S0300_40744_2;At_S0300_40744_3;	-	-
At01	At_S0490	p3	TTCTTCTTCTTCTTCTTCTTCTTCTTCTTC	51969	GOBAR_AA18997	51453	57765	+	GO:0005887|GO:0008515|GO:0015770|	integral component of plasma membrane|sucrose transmembrane transporter activity|sucrose transport|	-	-	K15378	-	At_S0490_51969_1;At_S0490_51969_2;At_S0490_51969_3;	-	-
At01	At_S0420	p2	ATATATATATATATATATATATAT	66117	GOBAR_AA16437	65360	69120	-	GO:0007275|	multicellular organism development|	-	-	-	-	-	-	At_S0420_66117_1;At_S0420_66117_2;At_S0420_66117_3;
At01	At_S0420	p2	ATATATATATATATATATATATAT	67046	GOBAR_AA16437	65360	69120	-	GO:0007275|	multicellular organism development|	-	-	-	-	-	-	At_S0420_67046_1;At_S0420_67046_2;At_S0420_67046_3;
At01	At_S0545	p3	TTATTATTATTATTATTA	82083	GOBAR_AA21683	76805	83069	-	GO:0004672|GO:0005524|GO:0006468|GO:0004672|GO:0006468|GO:0005524|	protein kinase activity|ATP binding|protein phosphorylation|protein kinase activity|protein phosphorylation|ATP binding|	-	-	-	At_S0545_82083_1;At_S0545_82083_2;At_S0545_82083_3;	-	-	-
At01	At_S0183	p2	TATATATATATATATATATA	92530	GOBAR_AA06727	90352	93040	-	-	-	-	-	-	-	At_S0183_92530_1;At_S0183_92530_2;At_S0183_92530_3;	-	-
At01	At_S0474	p6	GAAGTGGAAGTGGAAGTG	92667	GOBAR_AA18587	92349	92933	+	GO:0003676|	nucleic acid binding|	-	-	-	At_S0474_92667_1;At_S0474_92667_2;At_S0474_92667_3;	-	-	-
At01	At_S0335	p6	ATTTTTATTTTTATTTTT	123162	GOBAR_AA12595	121830	123747	-	GO:0000287|GO:0004427|GO:0005737|GO:0006796|	magnesium ion binding|inorganic diphosphatase activity|cytoplasm|phosphate-containing compound metabolic process|	ko00190|	Oxidative phosphorylation |	K01507	-	At_S0335_123162_1;At_S0335_123162_2;At_S0335_123162_3;	-	-
At01	At_S0001	p4	TACATACATACATACATACATACATACATACA	145252	GOBAR_AA37833	143872	145675	-	GO:0005622|GO:0008270|	intracellular|zinc ion binding|	-	-	-	At_S0001_145252_1;At_S0001_145252_2;At_S0001_145252_3;	-	-	-
At01	At_S0001	p3	GGCGGCGGCGGCGGCGGC	175985	GOBAR_AA23112	175616	176074	+	GO:0003676|GO:0003676|GO:0008270|GO:0003677|GO:0006355|	nucleic acid binding|nucleic acid binding|zinc ion binding|DNA binding|regulation of transcription, DNA-templated|	-	-	K09250	-	At_S0001_175985_1;At_S0001_175985_2;At_S0001_175985_3;	-	-
At01	At_S0001	p6	GGATGAGGATGAGGATGA	200495	GOBAR_AA23115	195109	203993	+	GO:0004842|GO:0005488|	ubiquitin-protein transferase activity|binding|	-	-	K10590	-	At_S0001_200495_1;At_S0001_200495_2;At_S0001_200495_3;	-	-
At01	At_S0001	p4	ATACATACATACATACATACATACATAC	343383	GOBAR_AA35214	342678	347569	-	-	-	-	-	-	-	-	-	At_S0001_343383_1;At_S0001_343383_2;At_S0001_343383_3;
At01	At_S0001	p6	AAAAATAAAAATAAAAAT	397846	GOBAR_AA35221	394649	399265	-	GO:0000166|GO:0003676|GO:0003723|GO:0005634|GO:0006396|GO:0030529|	nucleotide binding|nucleic acid binding|RNA binding|nucleus|RNA processing|intracellular ribonucleoprotein complex|	-	-	K15191	-	At_S0001_397846_1;At_S0001_397846_2;At_S0001_397846_3;	-	-
At01	At_S0001	p6	ATTTTTATTTTTATTTTT	408495	GOBAR_AA30872	407978	409841	-	GO:0016021|	integral component of membrane|	-	-	-	At_S0001_408495_1;At_S0001_408495_2;At_S0001_408495_3;	-	-	-
At01	At_S0001	p6	GGCAAGGGCAAGGGCAAG	446867	GOBAR_AA30876	442605	447285	-	GO:0000220|GO:0015078|GO:0015991|GO:0033179|	vacuolar proton-transporting V-type ATPase, V0 domain|hydrogen ion transmembrane transporter activity|ATP hydrolysis coupled proton transport|proton-transporting V-type ATPase, V0 domain|	-	-	K02154	At_S0001_446867_1;At_S0001_446867_2;At_S0001_446867_3;	-	-	-
At01	At_S0001	p6	TTTTATTTTTATTTTTAT	482701	GOBAR_AA30877	481207	488081	+	GO:0005506|GO:0016491|GO:0055114|GO:0016491|GO:0055114|	iron ion binding|oxidoreductase activity|oxidation-reduction process|oxidoreductase activity|oxidation-reduction process|	-	-	-	-	-	-	At_S0001_482701_1;At_S0001_482701_2;At_S0001_482701_3;
At01	At_S0001	p2	TCTCTCTCTCTCTCTCTCTCTCTC	528095	GOBAR_AA33671	524713	529848	+	-	-	-	-	-	-	At_S0001_528095_1;At_S0001_528095_2;At_S0001_528095_3;	-	-
At01	At_S0001	p4	ACATACATACATACATACAT	631359	GOBAR_AA32409	627435	632016	-	GO:0006486|GO:0008417|GO:0016020|	protein glycosylation|fucosyltransferase activity|membrane|	-	-	K00753	At_S0001_631359_1;At_S0001_631359_3;	At_S0001_631359_2;	-	-
At01	At_S0001	p3	AATAATAATAATAATAAT	864450	GOBAR_AA01433	847633	867143	-	GO:0005488|GO:0005515|GO:0008144|GO:0016773|	binding|protein binding|drug binding|phosphotransferase activity, alcohol group as acceptor|	ko04012|ko04630|ko04066|ko04072|ko04151|ko04152|ko04150|ko04139|ko04910|ko04920|ko04919|ko04211|ko04212|ko04213|ko05200|ko05230|ko05231|ko05206|ko05205|ko05214|ko05221|ko05215|ko04930|ko04931|	ErbB signaling pathway |Jak-STAT signaling pathway |HIF-1 signaling pathway |Phospholipase D signaling pathway |PI3K-Akt signaling pathway |AMPK signaling pathway |mTOR signaling pathway |Regulation of mitophagy - yeast |Insulin signaling pathway |Adipocytokine signaling pathway |Thyroid hormone signaling pathway |Longevity regulating pathway - mammal |Longevity regulating pathway - worm |Longevi…	K07203	At_S0001_864450_1;At_S0001_864450_2;At_S0001_864450_3;	-	-	-
At01	At_S0001	p6	AGGAGCAGGAGCAGGAGCAGGAGCAGGAGCAGGAGCAGGAGCAGGAGCAGGAGC	933966	GOBAR_AA01445	932868	934880	-	-	-	-	-	-	-	At_S0001_933966_1;At_S0001_933966_2;At_S0001_933966_3;	-	-
At01	At_S0001	p2	ATATATATATATATATATATAT	951995	GOBAR_AA01448	948851	952784	+	-	-	-	-	-	At_S0001_951995_1;At_S0001_951995_2;	At_S0001_951995_3;	-	-
At01	At_S0001	p6	CAGAAACAGAAACAGAAA	1158666	GOBAR_AA01471	1154900	1158965	-	GO:0000049|GO:0000166|GO:0004812|GO:0005524|GO:0005737|GO:0006418|GO:0000166|GO:0004812|GO:0005524|GO:0006418|GO:0000166|GO:0004818|GO:0005524|GO:0005737|GO:0006424|GO:0000166|GO:0005524|GO:0005737|GO:0016876|GO:0043039|GO:0005524|GO:0016876|GO:0043039|	tRNA binding|nucleotide binding|aminoacyl-tRNA ligase activity|ATP binding|cytoplasm|tRNA aminoacylation for protein translation|nucleotide binding|aminoacyl-tRNA ligase activity|ATP binding|tRNA aminoacylation for protein translation|nucleotide binding|glutamate-tRNA ligase activity|ATP binding|cytoplasm|glutamyl-tRNA aminoacylation|nucleotide binding|ATP binding|cytoplasm|ligase activity, formi…	ko00860|ko00970|	Porphyrin and chlorophyll metabolism |Aminoacyl-tRNA biosynthesis |	K01885	At_S0001_1158666_3;	At_S0001_1158666_1;At_S0001_1158666_2;	-	-
At01	At_S0001	p6	ATATAAATATAAATATAAATATAA	1283311	GOBAR_AA34705	1278317	1285247	+	-	-	-	-	-	At_S0001_1283311_1;At_S0001_1283311_2;At_S0001_1283311_3;	-	-	-
At01	At_S0001	p6	TCTGCATCTGCATCTGCA	1325269	GOBAR_AA34553	1322241	1332781	+	GO:0004672|GO:0005524|GO:0006468|GO:0004672|GO:0006468|GO:0005488|GO:0005515|GO:0005524|	protein kinase activity|ATP binding|protein phosphorylation|protein kinase activity|protein phosphorylation|binding|protein binding|ATP binding|	-	-	-	-	At_S0001_1325269_1;At_S0001_1325269_2;At_S0001_1325269_3;	-	-
At01	At_S0001	p3	TTCTTCTTCTTCTTCTTCTTCTTC	1377235	GOBAR_AA34560	1376553	1378843	-	-	-	-	-	-	-	At_S0001_1377235_1;At_S0001_1377235_2;At_S0001_1377235_3;	-	-
At01	At_S0001	p6	ATACATATACATATACATATACATATACATATACATATACAT	1424202	GOBAR_AA28832	1422300	1425083	-	GO:0008375|GO:0016020|	acetylglucosaminyltransferase activity|membrane|	-	-	-	-	At_S0001_1424202_1;At_S0001_1424202_2;At_S0001_1424202_3;	-	-
At01	At_S0001	p3	AATAATAATAATAATAAT	1443532	GOBAR_AA28833	1437259	1443834	-	GO:0015031|GO:0016021|	protein transport|integral component of membrane|	-	-	-	-	At_S0001_1443532_1;At_S0001_1443532_2;At_S0001_1443532_3;	-	-
At01	At_S0001	p3	CTTCTTCTTCTTCTTCTT	1495495	GOBAR_AA28840	1495239	1497042	+	GO:0003677|GO:0003700|GO:0006355|	DNA binding|transcription factor activity, sequence-specific DNA binding|regulation of transcription, DNA-templated|	-	-	-	-	At_S0001_1495495_1;	At_S0001_1495495_2;At_S0001_1495495_3;	-
At01	At_S0001	p3	CACCACCACCACCACCAC	1662139	GOBAR_AA35072	1662052	1663269	+	GO:0005515|	protein binding|	-	-	-	-	-	At_S0001_1662139_1;At_S0001_1662139_2;At_S0001_1662139_3;	-
At01	At_S0001	p6	TGAAGATGAAGATGAAGA	1677336	GOBAR_AA35075	1676024	1678683	+	-	-	-	-	-	-	At_S0001_1677336_2;	At_S0001_1677336_1;	At_S0001_1677336_3;
At01	At_S0001	p3	TTCTTCTTCTTCTTCTTCTTC	1730576	GOBAR_AA28651	1727397	1730686	-	-	-	-	-	-	-	At_S0001_1730576_3;	At_S0001_1730576_1;At_S0001_1730576_2;	-
At01	At_S0001	p6	GCTTTGGCTTTGGCTTTG	1857231	GOBAR_AA30074	1856691	1859278	+	GO:0003677|	DNA binding|	-	-	-	-	-	At_S0001_1857231_1;At_S0001_1857231_2;At_S0001_1857231_3;	-
At01	At_S0001	p2	TATATATATATATATATA	1876357	GOBAR_AA30073	1868859	1876566	+	GO:0005096|GO:0005515|GO:0005515|GO:0005737|	GTPase activator activity|protein binding|protein binding|cytoplasm|	ko04144|	Endocytosis |	K12489	-	-	-	At_S0001_1876357_1;At_S0001_1876357_2;At_S0001_1876357_3;
At01	At_S0001	p5	AAAAGAAAAGAAAAGAAAAG	1885013	GOBAR_AA30072	1883714	1886295	+	-	-	ko04075|	Plant hormone signal transduction |	K13464	-	-	-	At_S0001_1885013_1;At_S0001_1885013_2;At_S0001_1885013_3;
At01	At_S0001	p4	TACATACATACATACATACATACA	1951677	GOBAR_AA14281	1951338	1954648	+	GO:0005515|GO:0019199|	protein binding|transmembrane receptor protein kinase activity|	-	-	-	-	At_S0001_1951677_1;At_S0001_1951677_2;At_S0001_1951677_3;	-	-
At01	At_S0001	p6	AAAAACAAAAACAAAAAC	1952116	GOBAR_AA14281	1951338	1954648	+	GO:0005515|GO:0019199|	protein binding|transmembrane receptor protein kinase activity|	-	-	-	At_S0001_1952116_1;At_S0001_1952116_2;At_S0001_1952116_3;	-	-	-
At01	At_S0001	p3	TAATAATAATAATAATAATAATAATAATAATAATAATAATAATAATAATAA	1952857	GOBAR_AA14281	1951338	1954648	+	GO:0005515|GO:0019199|	protein binding|transmembrane receptor protein kinase activity|	-	-	-	At_S0001_1952857_1;At_S0001_1952857_2;At_S0001_1952857_3;	-	-	-
At01	At_S0001	p4	ATACATACATACATACATACATACATACATACATACATACATAC	1980183	GOBAR_AA14283	1980078	1983239	+	GO:0016021|	integral component of membrane|	-	-	K15382	-	At_S0001_1980183_1;At_S0001_1980183_2;At_S0001_1980183_3;	-	-
At01	At_S0001	p3	ACCACCACCACCACCACCACC	1983006	GOBAR_AA14283	1980078	1983239	+	GO:0016021|	integral component of membrane|	-	-	K15382	-	At_S0001_1983006_1;At_S0001_1983006_2;At_S0001_1983006_3;	-	-
At01	At_S0001	p3	TGATGATGATGATGATGATGATGATGATGA	1983152	GOBAR_AA14283	1980078	1983239	+	GO:0016021|	integral component of membrane|	-	-	K15382	-	At_S0001_1983152_1;At_S0001_1983152_2;At_S0001_1983152_3;	-	-
At01	At_S0001	p3	TTATTATTATTATTATTA	2229893	GOBAR_AA33377	2229693	2238308	+	GO:0016491|GO:0055114|	oxidoreductase activity|oxidation-reduction process|	-	-	-	-	-	-	-
At01	At_S0001	p6	AGCATAAGCATAAGCATA	2369188	GOBAR_AA29914	2368558	2371829	-	GO:0046872|	metal ion binding|	-	-	-	-	At_S0001_2369188_1;At_S0001_2369188_2;At_S0001_2369188_3;	-	-
At01	At_S0001	p2	ACACACACACACACACACAC	2371731	GOBAR_AA29914	2368558	2371829	-	GO:0046872|	metal ion binding|	-	-	-	-	At_S0001_2371731_1;At_S0001_2371731_2;At_S0001_2371731_3;	-	-
At01	At_S0001	p2	AGAGAGAGAGAGAGAGAG	2403238	GOBAR_AA29922	2398575	2404105	-	GO:0006511|GO:0031461|GO:0031625|GO:0006511|GO:0031625|	ubiquitin-dependent protein catabolic process|cullin-RING ubiquitin ligase complex|ubiquitin protein ligase binding|ubiquitin-dependent protein catabolic process|ubiquitin protein ligase binding|	ko04141|ko04120|ko04310|ko04350|ko04110|ko04111|ko04114|ko04710|ko05168|	Protein processing in endoplasmic reticulum |Ubiquitin mediated proteolysis |Wnt signaling pathway |TGF-beta signaling pathway |Cell cycle |Cell cycle - yeast |Oocyte meiosis |Circadian rhythm |Herpes simplex infection |	K03347	-	At_S0001_2403238_1;At_S0001_2403238_2;At_S0001_2403238_3;	-	-
At01	At_S0001	p3	TTCTTCTTCTTCTTCTTCTTCTTCTTC	2473223	GOBAR_AA38821	2468290	2477109	+	GO:0003824|	catalytic activity|	ko00564|ko00565|ko04014|ko04072|ko04071|ko04024|ko04144|ko04666|ko04912|ko04724|ko05231|	Glycerophospholipid metabolism |Ether lipid metabolism |Ras signaling pathway |Phospholipase D signaling pathway |Sphingolipid signaling pathway |cAMP signaling pathway |Endocytosis |Fc gamma R-mediated phagocytosis |GnRH signaling pathway |Glutamatergic synapse |Choline metabolism in cancer |	K01115	At_S0001_2473223_1;At_S0001_2473223_2;At_S0001_2473223_3;	-	-	-
At01	At_S0001	p1	AAAAAAAAAAAAAAAAAAAA	2754937	GOBAR_AA31637	2754125	2760058	+	GO:0006812|GO:0015299|GO:0016021|GO:0006812|GO:0015299|GO:0016021|GO:0055085|GO:0006814|GO:0006885|GO:0015385|GO:0016021|GO:0055085|	cation transport|solute:proton antiporter activity|integral component of membrane|cation transport|solute:proton antiporter activity|integral component of membrane|transmembrane transport|sodium ion transport|regulation of pH|sodium:proton antiporter activity|integral component of membrane|transmembrane transport|	-	-	K14724	At_S0001_2754937_1;At_S0001_2754937_2;At_S0001_2754937_3;	-	-	-
At01	At_S0001	p4	AAATAAATAAATAAATAAAT	2803610	GOBAR_AA25901	2800533	2804250	-	GO:0004672|GO:0005524|GO:0006468|GO:0004672|GO:0006468|GO:0005524|	protein kinase activity|ATP binding|protein phosphorylation|protein kinase activity|protein phosphorylation|ATP binding|	-	-	-	-	At_S0001_2803610_1;At_S0001_2803610_2;At_S0001_2803610_3;	-	-
At01	At_S0001	p2	ATATATATATATATATATAT	2822426	GOBAR_AA25904	2822030	2826778	-	GO:0003677|GO:0006355|	DNA binding|regulation of transcription, DNA-templated|	-	-	-	At_S0001_2822426_1;At_S0001_2822426_2;At_S0001_2822426_3;	-	-	-
At01	At_S0001	p3	TATTATTATTATTATTATTATTATTAT	2822569	GOBAR_AA25904	2822030	2826778	-	GO:0003677|GO:0006355|	DNA binding|regulation of transcription, DNA-templated|	-	-	-	At_S0001_2822569_2;	At_S0001_2822569_1;At_S0001_2822569_3;	-	-
At01	At_S0001	p2	ATATATATATATATATAT	2824226	GOBAR_AA25904	2822030	2826778	-	GO:0003677|GO:0006355|	DNA binding|regulation of transcription, DNA-templated|	-	-	-	-	At_S0001_2824226_1;At_S0001_2824226_2;At_S0001_2824226_3;	-	-
At01	At_S0001	p2	TATATATATATATATATA	2825821	GOBAR_AA25904	2822030	2826778	-	GO:0003677|GO:0006355|	DNA binding|regulation of transcription, DNA-templated|	-	-	-	At_S0001_2825821_1;At_S0001_2825821_2;At_S0001_2825821_3;	-	-	-
At01	At_S0001	p3	ATCATCATCATCATCATC	2840679	GOBAR_AA25905	2839510	2841214	+	-	-	-	-	-	-	At_S0001_2840679_1;At_S0001_2840679_2;At_S0001_2840679_3;	-	-
At01	At_S0001	p3	ATAATAATAATAATAATAATA	2954950	GOBAR_AA14624	2954228	2957477	+	GO:0004672|GO:0005524|GO:0006468|GO:0004672|GO:0006468|GO:0048544|	protein kinase activity|ATP binding|protein phosphorylation|protein kinase activity|protein phosphorylation|recognition of pollen|	-	-	-	-	-	-	-
At01	At_S0001	p3	ATGATGATGATGATGATGATGATGATGATG	3094759	GOBAR_AA14613	3092794	3096657	-	GO:0000166|GO:0003676|	nucleotide binding|nucleic acid binding|	ko03013|ko03015|	RNA transport |mRNA surveillance pathway |	K14325	-	At_S0001_3094759_1;At_S0001_3094759_2;At_S0001_3094759_3;	-	-
At01	At_S0001	p3	ACAACAACAACAACAACAACAACA	3135074	GOBAR_AA14609	3131841	3136967	+	-	-	ko03018|	RNA degradation |	K12617	-	At_S0001_3135074_1;At_S0001_3135074_2;At_S0001_3135074_3;	-	-
At01	At_S0001	p1	CCCCCCCCCCCCCCCCCCC	3287480	GOBAR_AA09418	3284308	3297506	-	GO:0003824|GO:0003824|GO:0030151|GO:0030170|GO:0006777|GO:0008265|	catalytic activity|catalytic activity|molybdenum ion binding|pyridoxal phosphate binding|Mo-molybdopterin cofactor biosynthetic process|Mo-molybdopterin cofactor sulfurase activity|	-	-	K15631	At_S0001_3287480_1;At_S0001_3287480_2;At_S0001_3287480_3;	-	-	-
At01	At_S0001	p3	TTATTATTATTATTATTA	3482262	GOBAR_AA31197	3478739	3483447	+	GO:0005524|GO:0005737|GO:0008360|GO:0008764|GO:0051301|GO:0005524|GO:0009058|GO:0005524|GO:0009058|GO:0016874|	ATP binding|cytoplasm|regulation of cell shape|UDP-N-acetylmuramoylalanine-D-glutamate ligase activity|cell division|ATP binding|biosynthetic process|ATP binding|biosynthetic process|ligase activity|	-	-	-	-	At_S0001_3482262_1;At_S0001_3482262_2;At_S0001_3482262_3;	-	-
At01	At_S0001	p6	CCTCAACCTCAACCTCAA	3543224	GOBAR_AA31205	3541712	3544016	-	-	-	-	-	-	At_S0001_3543224_1;At_S0001_3543224_2;At_S0001_3543224_3;	-	-	-
At01	At_S0001	p6	TCCAACTCCAACTCCAAC	3543616	GOBAR_AA31205	3541712	3544016	-	-	-	-	-	-	At_S0001_3543616_1;At_S0001_3543616_2;At_S0001_3543616_3;	-	-	-
At01	At_S0001	p2	ATATATATATATATATAT	3644439	GOBAR_AA25103	3644141	3646795	-	GO:0004650|GO:0005975|	polygalacturonase activity|carbohydrate metabolic process|	-	-	-	-	At_S0001_3644439_1;At_S0001_3644439_2;At_S0001_3644439_3;	-	-
At01	At_S0001	p1	TTTTTTTTTTTTTTTTTT	4078377	GOBAR_AA21703	4077362	4082824	+	GO:0004672|GO:0005524|GO:0006468|GO:0004672|GO:0006468|GO:0005524|GO:0030247|	protein kinase activity|ATP binding|protein phosphorylation|protein kinase activity|protein phosphorylation|ATP binding|polysaccharide binding|	-	-	-	-	-	-	At_S0001_4078377_1;At_S0001_4078377_2;At_S0001_4078377_3;
At01	At_S0001	p3	TAATAATAATAATAATAA	4431932	GOBAR_AA29683	4429257	4456704	+	GO:0005515|GO:0043531|	protein binding|ADP binding|	-	-	-	-	-	-	-
At01	At_S0001	p5	AAAATAAAATAAAATAAAAT	4653998	GOBAR_AA27327	4646588	4659365	-	GO:0003824|GO:0005992|GO:0003825|GO:0005992|	catalytic activity|trehalose biosynthetic process|alpha,alpha-trehalose-phosphate synthase (UDP-forming) activity|trehalose biosynthetic process|	ko00500|	Starch and sucrose metabolism |	K00697	-	At_S0001_4653998_1;At_S0001_4653998_2;At_S0001_4653998_3;	-	-
At01	At_S0001	p6	CCATCTCCATCTCCATCT	4700331	GOBAR_AA33790	4692621	4701757	-	GO:0043531|	ADP binding|	-	-	-	-	At_S0001_4700331_1;	At_S0001_4700331_2;At_S0001_4700331_3;	-
At01	At_S0001	p2	ATATATATATATATATAT	4778641	GOBAR_AA40391	4777000	4791306	+	GO:0043531|	ADP binding|	-	-	-	At_S0001_4778641_1;At_S0001_4778641_2;At_S0001_4778641_3;	-	-	-
At01	At_S0001	p3	TCGTCGTCGTCGTCGTCG	4914939	GOBAR_AA25153	4913704	4925308	-	GO:0043531|	ADP binding|	-	-	-	At_S0001_4914939_1;At_S0001_4914939_2;At_S0001_4914939_3;	-	-	-
At01	At_S0001	p6	ATTTCAATTTCAATTTCA	5000257	GOBAR_AA31997	4999591	5009938	+	GO:0004672|GO:0005524|GO:0006468|GO:0004672|GO:0006468|GO:0005515|GO:0005524|	protein kinase activity|ATP binding|protein phosphorylation|protein kinase activity|protein phosphorylation|protein binding|ATP binding|	-	-	-	-	At_S0001_5000257_1;At_S0001_5000257_2;At_S0001_5000257_3;	-	-
At01	At_S0001	p6	TAAAAATAAAAATAAAAA	5481105	GOBAR_AA24580	5464934	5481569	-	GO:0000723|GO:0003677|GO:0003684|GO:0005634|GO:0006303|GO:0042162|GO:0043564|GO:0003677|GO:0004003|GO:0006303|GO:0003677|GO:0006303|	telomere maintenance|DNA binding|damaged DNA binding|nucleus|double-strand break repair via nonhomologous end joining|telomeric DNA binding|Ku70:Ku80 complex|DNA binding|ATP-dependent DNA helicase activity|double-strand break repair via nonhomologous end joining|DNA binding|double-strand break repair via nonhomologous end joining|	ko03450|	Non-homologous end-joining |	K10884	-	-	At_S0001_5481105_1;At_S0001_5481105_2;At_S0001_5481105_3;	-
At01	At_S0001	p6	TTTATTTTTATTTTTATT	5758696	GOBAR_AA18111	5758310	5761712	+	-	-	-	-	-	At_S0001_5758696_1;At_S0001_5758696_2;At_S0001_5758696_3;	-	-	-
At01	At_S0001	p3	CTTCTTCTTCTTCTTCTT	6075541	GOBAR_AA36758	6075481	6076440	-	-	-	-	-	-	At_S0001_6075541_1;At_S0001_6075541_2;At_S0001_6075541_3;	-	-	-
At01	At_S0001	p5	AAAAGAAAAGAAAAGAAAAG	6076083	GOBAR_AA36758	6075481	6076440	-	-	-	-	-	-	-	-	-	At_S0001_6076083_1;At_S0001_6076083_2;At_S0001_6076083_3;
At01	At_S0001	p3	CACCACCACCACCACCAC	6685291	GOBAR_AA23885	6683944	6685890	+	-	-	-	-	-	-	At_S0001_6685291_2;At_S0001_6685291_3;	-	At_S0001_6685291_1;
At01	At_S0001	p6	ACCAACACCAACACCAAC	6685676	GOBAR_AA23885	6683944	6685890	+	-	-	-	-	-	-	At_S0001_6685676_1;At_S0001_6685676_2;At_S0001_6685676_3;	-	-
At01	At_S0001	p2	ATATATATATATATATAT	6693075	GOBAR_AA23884	6689626	6694064	-	GO:0005515|	protein binding|	-	-	-	-	At_S0001_6693075_1;At_S0001_6693075_2;At_S0001_6693075_3;	-	-
At01	At_S0001	p6	TTATTTTTATTTTTATTT	6716357	GOBAR_AA23881	6714926	6717871	+	-	-	-	-	K03953	-	-	-	-
At01	At_S0001	p6	ATACATATACATATACATATACATATACATATACATATACATATACATATACATATACAT	6818186	GOBAR_AA04133	6814684	6818895	-	-	-	-	-	-	-	At_S0001_6818186_1;At_S0001_6818186_2;At_S0001_6818186_3;	-	-
At01	At_S0001	p3	GAAGAAGAAGAAGAAGAA	6861570	GOBAR_AA04137	6860814	6862784	+	-	-	-	-	-	-	At_S0001_6861570_1;At_S0001_6861570_2;At_S0001_6861570_3;	-	-
At01	At_S0001	p3	AGAAGAAGAAGAAGAAGAAGAAGA	6862432	GOBAR_AA04137	6860814	6862784	+	-	-	-	-	-	-	At_S0001_6862432_1;At_S0001_6862432_2;At_S0001_6862432_3;	-	-
At01	At_S0001	p6	TTTGCTTTTGCTTTTGCT	6881175	GOBAR_AA04138	6874886	6882218	-	GO:0003824|GO:0005524|GO:0005524|GO:0005524|GO:0046872|GO:0006807|	catalytic activity|ATP binding|ATP binding|ATP binding|metal ion binding|nitrogen compound metabolic process|	ko00240|ko00250|	Pyrimidine metabolism |Alanine, aspartate and glutamate metabolism |	K01955	-	-	At_S0001_6881175_1;At_S0001_6881175_2;At_S0001_6881175_3;	-
At01	At_S0001	p3	TAATAATAATAATAATAATAATAA	6990999	GOBAR_AA04143	6988204	6995995	-	GO:0005524|	ATP binding|	-	-	-	At_S0001_6990999_1;At_S0001_6990999_2;At_S0001_6990999_3;	-	-	-
At01	At_S0001	p6	TTCTTTTTCTTTTTCTTT	7618620	GOBAR_AA28158	7613787	7619587	-	GO:0005515|GO:0007165|GO:0043531|	protein binding|signal transduction|ADP binding|	-	-	-	-	-	-	At_S0001_7618620_1;At_S0001_7618620_2;At_S0001_7618620_3;
At01	At_S0001	p4	TTTATTTATTTATTTATTTA	7815164	GOBAR_AA25791	7814857	7820296	+	-	-	-	-	-	-	At_S0001_7815164_1;At_S0001_7815164_2;At_S0001_7815164_3;	-	-
At01	At_S0001	p4	CAAACAAACAAACAAACAAACAAA	8086676	GOBAR_AA32453	8084599	8086915	-	-	-	-	-	-	-	-	At_S0001_8086676_1;At_S0001_8086676_2;At_S0001_8086676_3;	-
At01	At_S0001	p1	AAAAAAAAAAAAAAAAAAAAA	8089414	GOBAR_AA32454	8089058	8096497	-	-	-	-	-	-	At_S0001_8089414_1;At_S0001_8089414_2;At_S0001_8089414_3;	-	-	-
At01	At_S0001	p1	TTTTTTTTTTTTTTTTTTTTTTT	8275353	GOBAR_AA30896	8270700	8279348	+	GO:0005515|	protein binding|	-	-	-	-	-	At_S0001_8275353_1;At_S0001_8275353_2;At_S0001_8275353_3;	-
At01	At_S0001	p2	TCTCTCTCTCTCTCTCTCTCTCTC	8277561	GOBAR_AA30896	8270700	8279348	+	GO:0005515|	protein binding|	-	-	-	At_S0001_8277561_1;	-	At_S0001_8277561_2;At_S0001_8277561_3;	-
At01	At_S0001	p3	TAATAATAATAATAATAATAATAA	8510029	GOBAR_AA13197	8508805	8516276	-	GO:0003677|	DNA binding|	-	-	-	-	At_S0001_8510029_1;At_S0001_8510029_2;At_S0001_8510029_3;	-	-
At01	At_S0001	p6	TCGGGTTCGGGTTCGGGT	9216094	GOBAR_AA27488	9211661	9216526	-	GO:0005515|	protein binding|	-	-	-	-	At_S0001_9216094_1;At_S0001_9216094_2;At_S0001_9216094_3;	-	-
At01	At_S0001	p3	ATCATCATCATCATCATCATC	9249960	GOBAR_AA27487	9249743	9251778	+	GO:0046983|	protein dimerization activity|	-	-	-	-	At_S0001_9249960_1;At_S0001_9249960_2;At_S0001_9249960_3;	-	-
At01	At_S0001	p3	ACAACAACAACAACAACAACA	9250499	GOBAR_AA27487	9249743	9251778	+	GO:0046983|	protein dimerization activity|	-	-	-	-	-	At_S0001_9250499_1;At_S0001_9250499_2;At_S0001_9250499_3;	-
At01	At_S0001	p3	GGCGGCGGCGGCGGCGGC	9841621	GOBAR_AA00311	9840290	9844666	+	GO:0003950|GO:0046872|	NAD+ ADP-ribosyltransferase activity|metal ion binding|	-	-	-	-	-	-	-
At01	At_S0001	p3	GGCGGCGGCGGCGGCGGC	9842416	GOBAR_AA00311	9840290	9844666	+	GO:0003950|GO:0046872|	NAD+ ADP-ribosyltransferase activity|metal ion binding|	-	-	-	-	At_S0001_9842416_1;At_S0001_9842416_2;At_S0001_9842416_3;	-	-
At01	At_S0001	p2	TGTGTGTGTGTGTGTGTG	10035362	GOBAR_AA00321	10035187	10037839	+	GO:0000287|GO:0010333|GO:0016829|GO:0008152|GO:0010333|GO:0016829|	magnesium ion binding|terpene synthase activity|lyase activity|metabolic process|terpene synthase activity|lyase activity|	-	-	-	-	At_S0001_10035362_1;At_S0001_10035362_2;At_S0001_10035362_3;	-	-
At01	At_S0001	p3	CTTCTTCTTCTTCTTCTTCTT	10484107	GOBAR_AA13222	10483966	10484530	+	GO:0003677|	DNA binding|	-	-	-	At_S0001_10484107_1;At_S0001_10484107_2;At_S0001_10484107_3;	-	-	-
At01	At_S0001	p4	ATAAATAAATAAATAAATAA	10761160	GOBAR_AA20013	10760176	10766759	+	GO:0005488|GO:0044599|	binding|AP-5 adaptor complex|	-	-	-	-	At_S0001_10761160_1;At_S0001_10761160_2;At_S0001_10761160_3;	-	-
At01	At_S0001	p6	GTTTTTGTTTTTGTTTTT	10764759	GOBAR_AA20013	10760176	10766759	+	GO:0005488|GO:0044599|	binding|AP-5 adaptor complex|	-	-	-	-	At_S0001_10764759_1;At_S0001_10764759_2;At_S0001_10764759_3;	-	-
At01	At_S0001	p2	CTCTCTCTCTCTCTCTCTCT	11176811	GOBAR_AA26306	11176650	11178565	+	-	-	-	-	-	-	At_S0001_11176811_1;At_S0001_11176811_2;At_S0001_11176811_3;	-	-
At01	At_S0001	p4	TTTCTTTCTTTCTTTCTTTC	11511636	GOBAR_AA12165	11511326	11513710	+	GO:0016788|	hydrolase activity, acting on ester bonds|	-	-	-	-	At_S0001_11511636_1;At_S0001_11511636_2;At_S0001_11511636_3;	-	-
At01	At_S0001	p4	TTTCTTTCTTTCTTTCTTTC	11511978	GOBAR_AA12165	11511326	11513710	+	GO:0016788|	hydrolase activity, acting on ester bonds|	-	-	-	At_S0001_11511978_1;At_S0001_11511978_2;At_S0001_11511978_3;	-	-	-
At01	At_S0001	p2	TATATATATATATATATATA	11719279	GOBAR_AA30190	11709059	11727041	-	GO:0003824|GO:0009058|GO:0030170|	catalytic activity|biosynthetic process|pyridoxal phosphate binding|	ko00600|ko04071|	Sphingolipid metabolism |Sphingolipid signaling pathway |	K00654	-	-	-	-
At01	At_S0001	p6	TTTTCTTTTTCTTTTTCT	11720567	GOBAR_AA30190	11709059	11727041	-	GO:0003824|GO:0009058|GO:0030170|	catalytic activity|biosynthetic process|pyridoxal phosphate binding|	ko00600|ko04071|	Sphingolipid metabolism |Sphingolipid signaling pathway |	K00654	-	-	-	-
At01	At_S0001	p2	TATATATATATATATATA	11787009	GOBAR_AA20063	11783690	11787741	-	GO:0004190|GO:0006508|GO:0006629|	aspartic-type endopeptidase activity|proteolysis|lipid metabolic process|	-	-	K08245	-	At_S0001_11787009_1;At_S0001_11787009_2;At_S0001_11787009_3;	-	-
At01	At_S0001	p2	TGTGTGTGTGTGTGTGTGTG	11818765	GOBAR_AA20062	11816617	11818996	-	GO:0003700|GO:0006355|GO:0043565|	transcription factor activity, sequence-specific DNA binding|regulation of transcription, DNA-templated|sequence-specific DNA binding|	-	-	-	-	At_S0001_11818765_1;At_S0001_11818765_2;At_S0001_11818765_3;	-	-
At01	At_S0001	p6	TTATTTTTATTTTTATTT	12026766	GOBAR_AA34118	12026501	12033373	+	GO:0005509|GO:0005515|GO:0005525|	calcium ion binding|protein binding|GTP binding|	ko04144|	Endocytosis |	-	-	-	-	At_S0001_12026766_1;At_S0001_12026766_2;At_S0001_12026766_3;
At01	At_S0001	p2	TCTCTCTCTCTCTCTCTCTCTCTCTC	12068880	GOBAR_AA02934	12068577	12070871	+	-	-	ko04144|	Endocytosis |	K12199	-	-	At_S0001_12068880_1;At_S0001_12068880_2;At_S0001_12068880_3;	-
At01	At_S0001	p3	AAGAAGAAGAAGAAGAAGAAGAAGAAG	12077927	GOBAR_AA02936	12074758	12078066	-	GO:0008168|	methyltransferase activity|	-	-	-	-	At_S0001_12077927_1;At_S0001_12077927_2;At_S0001_12077927_3;	-	-
At01	At_S0001	p3	AAGAAGAAGAAGAAGAAGAAG	12241369	GOBAR_AA02943	12238831	12241435	-	GO:0003924|GO:0005525|GO:0005525|GO:0005737|GO:0005525|GO:0005874|GO:0007017|	GTPase activity|GTP binding|GTP binding|cytoplasm|GTP binding|microtubule|microtubule-based process|	ko04112|	Cell cycle - Caulobacter |	K03531	-	-	At_S0001_12241369_1;At_S0001_12241369_2;At_S0001_12241369_3;	-
At01	At_S0001	p6	TATATGTATATGTATATG	12290753	GOBAR_AA14549	12287873	12290956	-	GO:0005774|GO:0005886|GO:0006814|GO:0009651|GO:0055075|GO:0006812|GO:0015299|GO:0016021|GO:0006812|GO:0015299|GO:0016021|GO:0055085|GO:0006814|GO:0006885|GO:0015385|GO:0016021|GO:0055085|	vacuolar membrane|plasma membrane|sodium ion transport|response to salt stress|potassium ion homeostasis|cation transport|solute:proton antiporter activity|integral component of membrane|cation transport|solute:proton antiporter activity|integral component of membrane|transmembrane transport|sodium ion transport|regulation of pH|sodium:proton antiporter activity|integral component of membrane|tra…	-	-	-	At_S0001_12290753_1;At_S0001_12290753_2;At_S0001_12290753_3;	-	-	-
At01	At_S0001	p2	ATATATATATATATATATAT	12347918	GOBAR_AA14551	12347226	12348866	+	-	-	-	-	K06911	At_S0001_12347918_1;At_S0001_12347918_2;At_S0001_12347918_3;	-	-	-
At01	At_S0001	p4	TATGTATGTATGTATGTATG	12488756	GOBAR_AA14563	12483751	12489408	+	GO:0003700|GO:0006355|GO:0043565|	transcription factor activity, sequence-specific DNA binding|regulation of transcription, DNA-templated|sequence-specific DNA binding|	-	-	-	-	-	At_S0001_12488756_1;At_S0001_12488756_2;At_S0001_12488756_3;	-
At01	At_S0001	p1	CCCCCCCCCCCCCCCCCCCCCCCCCCCCCCCCCCCCCCCCCCC	12601533	GOBAR_AA31304	12591654	12603389	-	GO:0003824|GO:0016614|GO:0050660|GO:0055114|GO:0050660|	catalytic activity|oxidoreductase activity, acting on CH-OH group of donors|flavin adenine dinucleotide binding|oxidation-reduction process|flavin adenine dinucleotide binding|	-	-	-	At_S0001_12601533_1;At_S0001_12601533_2;At_S0001_12601533_3;	-	-	-
At01	At_S0001	p6	CTTTTGCTTTTGCTTTTG	12743261	GOBAR_AA21691	12741540	12744060	+	-	-	-	-	-	-	-	-	At_S0001_12743261_1;At_S0001_12743261_2;At_S0001_12743261_3;
At01	At_S0001	p6	TTTTTATTTTTATTTTTA	13108691	GOBAR_AA21562	13105467	13108811	+	GO:0000737|GO:0003677|GO:0005694|GO:0003677|GO:0003824|GO:0005524|GO:0005694|GO:0006259|	DNA catabolic process, endonucleolytic|DNA binding|chromosome|DNA binding|catalytic activity|ATP binding|chromosome|DNA metabolic process|	ko04113|	Meiosis - yeast |	K10878	-	-	At_S0001_13108691_1;At_S0001_13108691_2;At_S0001_13108691_3;	-
At01	At_S0001	p6	TTTATTTTTATTTTTATTTTTATTTTTATTTTTATT	13195561	GOBAR_AA21555	13191844	13195819	+	-	-	-	-	-	-	-	-	At_S0001_13195561_1;At_S0001_13195561_2;At_S0001_13195561_3;
At01	At_S0001	p6	ATAAAAATAAAAATAAAA	13316996	GOBAR_AA16423	13314696	13317786	+	GO:0016787|	hydrolase activity|	-	-	-	At_S0001_13316996_1;At_S0001_13316996_2;At_S0001_13316996_3;	-	-	-
At01	At_S0001	p3	CCACCACCACCACCACCA	13415287	GOBAR_AA16431	13415166	13415720	-	GO:0005634|GO:0006355|GO:0043565|GO:0046982|	nucleus|regulation of transcription, DNA-templated|sequence-specific DNA binding|protein heterodimerization activity|	-	-	-	-	At_S0001_13415287_1;At_S0001_13415287_2;At_S0001_13415287_3;	-	-
At01	At_S0001	p6	GAGGATGAGGATGAGGAT	13559704	GOBAR_AA31676	13548805	13565689	+	GO:0004842|GO:0005488|GO:0005515|	ubiquitin-protein transferase activity|binding|protein binding|	ko04120|	Ubiquitin mediated proteolysis |	-	-	At_S0001_13559704_1;At_S0001_13559704_2;At_S0001_13559704_3;	-	-
At01	At_S0001	p3	AAGAAGAAGAAGAAGAAG	13805618	GOBAR_AA03672	13801816	13805834	-	-	-	-	-	-	-	At_S0001_13805618_1;At_S0001_13805618_2;At_S0001_13805618_3;	-	-
At01	At_S0001	p6	AGGTTGAGGTTGAGGTTG	13911860	GOBAR_AA03667	13909365	13914269	-	GO:0003723|GO:0006364|GO:0008757|GO:0003723|GO:0008168|GO:0008168|	RNA binding|rRNA processing|S-adenosylmethionine-dependent methyltransferase activity|RNA binding|methyltransferase activity|methyltransferase activity|	-	-	K14835	-	At_S0001_13911860_1;At_S0001_13911860_2;At_S0001_13911860_3;	-	-
At01	At_S0001	p6	GACCAAGACCAAGACCAAGACCAA	14428563	GOBAR_AA17701	14427137	14429731	+	GO:0006816|GO:0015369|GO:0016021|GO:0055085|	calcium ion transport|calcium:proton antiporter activity|integral component of membrane|transmembrane transport|	-	-	K07300	At_S0001_14428563_1;At_S0001_14428563_3;	At_S0001_14428563_2;	-	-
At01	At_S0001	p2	AGAGAGAGAGAGAGAGAGAGAGAGAGAGAGAGAGAGAGAGAGAG	15439465	GOBAR_AA05655	15435589	15439718	-	-	-	-	-	-	At_S0001_15439465_1;At_S0001_15439465_2;At_S0001_15439465_3;	-	-	-
At01	At_S0001	p1	CCCCCCCCCCCCCCCCCC	15589159	GOBAR_AA05653	15583828	15589545	-	GO:0005515|	protein binding|	-	-	-	At_S0001_15589159_1;At_S0001_15589159_2;	At_S0001_15589159_3;	-	-
At01	At_S0001	p2	ACACACACACACACACACACACACACACACACAC	15884800	GOBAR_AA09245	15882656	15956461	+	GO:0004672|GO:0005524|GO:0006468|GO:0004672|GO:0006468|GO:0005515|	protein kinase activity|ATP binding|protein phosphorylation|protein kinase activity|protein phosphorylation|protein binding|	-	-	-	At_S0001_15884800_1;At_S0001_15884800_2;At_S0001_15884800_3;	-	-	-
At01	At_S0001	p2	ATATATATATATATATATAT	16594629	GOBAR_AA04703	16593847	16597239	+	GO:0016021|	integral component of membrane|	-	-	-	At_S0001_16594629_1;At_S0001_16594629_3;	-	At_S0001_16594629_2;	-
At01	At_S0001	p1	TTTTTTTTTTTTTTTTTTTTTT	16596641	GOBAR_AA04703	16593847	16597239	+	GO:0016021|	integral component of membrane|	-	-	-	At_S0001_16596641_2;	-	-	At_S0001_16596641_1;At_S0001_16596641_3;
At01	At_S0001	p2	AGAGAGAGAGAGAGAGAG	16684517	GOBAR_AA04704	16682317	16684684	-	GO:0003677|	DNA binding|	-	-	K09422	At_S0001_16684517_1;	At_S0001_16684517_2;At_S0001_16684517_3;	-	-
At01	At_S0001	p3	TTCTTCTTCTTCTTCTTC	17084838	GOBAR_AA04456	17084689	17086987	+	GO:0005515|GO:0016567|	protein binding|protein ubiquitination|	-	-	-	-	At_S0001_17084838_1;At_S0001_17084838_2;At_S0001_17084838_3;	-	-
At01	At_S0001	p6	TCATGCTCATGCTCATGC	17351228	GOBAR_AA04447	17351125	17353403	-	-	-	-	-	-	-	-	-	At_S0001_17351228_1;At_S0001_17351228_2;At_S0001_17351228_3;
At01	At_S0001	p2	ATATATATATATATATAT	17445547	GOBAR_AA04444	17444158	17459056	+	GO:0005515|	protein binding|	-	-	-	At_S0001_17445547_1;At_S0001_17445547_2;At_S0001_17445547_3;	-	-	-
At01	At_S0001	p6	AATCAAAATCAAAATCAA	18242564	GOBAR_AA18245	18236897	18257915	+	GO:0006606|	protein import into nucleus|	ko03013|ko05200|ko05216|	RNA transport |Pathways in cancer |Thyroid cancer |	K09291	At_S0001_18242564_1;At_S0001_18242564_2;At_S0001_18242564_3;	-	-	-
At01	At_S0001	p6	GCCGCTGCCGCTGCCGCTGCCGCT	18267784	GOBAR_AA18246	18259739	18268164	+	GO:0006606|	protein import into nucleus|	-	-	K09291	-	At_S0001_18267784_1;At_S0001_18267784_2;At_S0001_18267784_3;	-	-
At01	At_S0001	p5	TTTTGTTTTGTTTTGTTTTG	18418744	GOBAR_AA21380	18418410	18421279	+	-	-	-	-	-	-	At_S0001_18418744_1;At_S0001_18418744_2;At_S0001_18418744_3;	-	-
At01	At_S0001	p2	TCTCTCTCTCTCTCTCTCTCTCTC	18678596	GOBAR_AA18596	18678140	18679683	+	GO:0004672|GO:0005524|GO:0006468|GO:0004672|GO:0006468|GO:0005524|	protein kinase activity|ATP binding|protein phosphorylation|protein kinase activity|protein phosphorylation|ATP binding|	-	-	-	-	At_S0001_18678596_1;At_S0001_18678596_2;At_S0001_18678596_3;	-	-
At01	At_S0001	p6	TTTTATTTTTATTTTTAT	18705399	GOBAR_AA18597	18702160	18711020	+	GO:0003677|	DNA binding|	-	-	-	-	At_S0001_18705399_1;At_S0001_18705399_2;At_S0001_18705399_3;	-	-
At01	At_S0001	p6	ATGCCTATGCCTATGCCT	18707076	GOBAR_AA18597	18702160	18711020	+	GO:0003677|	DNA binding|	-	-	-	-	-	-	At_S0001_18707076_1;At_S0001_18707076_2;At_S0001_18707076_3;
At01	At_S0001	p6	ATGCCTATGCCTATGCCT	18707931	GOBAR_AA18597	18702160	18711020	+	GO:0003677|	DNA binding|	-	-	-	-	-	-	At_S0001_18707931_1;At_S0001_18707931_2;At_S0001_18707931_3;
At01	At_S0001	p5	TATATTATATTATATTATATTATATTATATTATATTATATTATATTATAT	18793522	GOBAR_AA38066	18791242	18796488	+	GO:0003677|	DNA binding|	-	-	-	-	-	-	-
At01	At_S0001	p6	ATAATCATAATCATAATC	19265336	GOBAR_AA19001	19261188	19265513	-	GO:0006952|GO:0016021|	defense response|integral component of membrane|	-	-	K08472	-	At_S0001_19265336_1;At_S0001_19265336_2;At_S0001_19265336_3;	-	-
At01	At_S0001	p6	TTTTTATTTTTATTTTTA	19344912	GOBAR_AA19170	19341552	19350416	-	GO:0005509|GO:0005515|	calcium ion binding|protein binding|	-	-	-	At_S0001_19344912_1;At_S0001_19344912_2;At_S0001_19344912_3;	-	-	-
At01	At_S0001	p2	ACACACACACACACACACAC	19392175	GOBAR_AA19171	19385669	19392339	-	GO:0005515|	protein binding|	-	-	-	-	At_S0001_19392175_1;At_S0001_19392175_2;At_S0001_19392175_3;	-	-
At01	At_S0001	p4	AAATAAATAAATAAATAAATAAAT	19504654	GOBAR_AA25760	19503840	19506153	-	-	-	-	-	-	-	-	-	At_S0001_19504654_1;At_S0001_19504654_2;At_S0001_19504654_3;
At01	At_S0001	p4	AAATAAATAAATAAATAAATAAAT	19505755	GOBAR_AA25760	19503840	19506153	-	-	-	-	-	-	-	-	-	At_S0001_19505755_1;At_S0001_19505755_2;At_S0001_19505755_3;
At01	At_S0001	p3	TACTACTACTACTACTAC	19620219	GOBAR_AA25755	19612141	19624587	+	GO:0005319|GO:0016021|GO:0008158|GO:0016020|	lipid transporter activity|integral component of membrane|hedgehog receptor activity|membrane|	ko04142|	Lysosome |	K12385	-	-	At_S0001_19620219_1;At_S0001_19620219_2;At_S0001_19620219_3;	-
At01	At_S0001	p6	TTGTTTTTGTTTTTGTTT	19624384	GOBAR_AA25755	19612141	19624587	+	GO:0005319|GO:0016021|GO:0008158|GO:0016020|	lipid transporter activity|integral component of membrane|hedgehog receptor activity|membrane|	ko04142|	Lysosome |	K12385	-	-	-	At_S0001_19624384_1;At_S0001_19624384_2;At_S0001_19624384_3;
At01	At_S0001	p3	TTCTTCTTCTTCTTCTTC	19845304	GOBAR_AA19918	19844124	19845906	+	GO:0005634|GO:0042254|	nucleus|ribosome biogenesis|	-	-	K14799	-	-	-	At_S0001_19845304_1;At_S0001_19845304_2;At_S0001_19845304_3;
At01	At_S0001	p4	TTTATTTATTTATTTATTTA	19895127	GOBAR_AA19922	19894226	19903308	+	-	-	-	-	-	-	-	-	At_S0001_19895127_1;At_S0001_19895127_2;At_S0001_19895127_3;
At01	At_S0001	p6	TTTATTTTTATTTTTATT	19895338	GOBAR_AA19922	19894226	19903308	+	-	-	-	-	-	At_S0001_19895338_1;At_S0001_19895338_2;At_S0001_19895338_3;	-	-	-
At01	At_S0001	p3	CTGCTGCTGCTGCTGCTG	20346004	GOBAR_AA03577	20343901	20346745	+	GO:0003824|GO:0008152|	catalytic activity|metabolic process|	-	-	K10526	-	-	At_S0001_20346004_1;At_S0001_20346004_2;At_S0001_20346004_3;	-
At01	At_S0001	p4	TACATACATACATACATACATACATACATACA	20346531	GOBAR_AA03577	20343901	20346745	+	GO:0003824|GO:0008152|	catalytic activity|metabolic process|	-	-	K10526	-	-	At_S0001_20346531_1;At_S0001_20346531_2;At_S0001_20346531_3;	-
At01	At_S0001	p5	ATTGAATTGAATTGAATTGA	20661490	GOBAR_AA09057	20660441	20663418	+	GO:0005507|GO:0005507|GO:0016491|GO:0055114|GO:0016491|GO:0055114|	copper ion binding|copper ion binding|oxidoreductase activity|oxidation-reduction process|oxidoreductase activity|oxidation-reduction process|	-	-	-	At_S0001_20661490_1;At_S0001_20661490_2;At_S0001_20661490_3;	-	-	-
At01	At_S0001	p6	ATCAAAATCAAAATCAAA	20986999	GOBAR_AA16148	20986024	20993177	+	GO:0016021|GO:0055085|	integral component of membrane|transmembrane transport|	-	-	-	-	-	At_S0001_20986999_1;At_S0001_20986999_2;At_S0001_20986999_3;	-
At01	At_S0001	p6	ATCAAAATCAAAATCAAA	20988398	GOBAR_AA16148	20986024	20993177	+	GO:0016021|GO:0055085|	integral component of membrane|transmembrane transport|	-	-	-	-	-	At_S0001_20988398_1;At_S0001_20988398_2;At_S0001_20988398_3;	-
At01	At_S0001	p3	TCTTCTTCTTCTTCTTCT	21218513	GOBAR_AA21463	21218325	21222525	+	GO:0035556|	intracellular signal transduction|	-	-	-	-	At_S0001_21218513_1;At_S0001_21218513_2;At_S0001_21218513_3;	-	-
At01	At_S0001	p3	TTCTTCTTCTTCTTCTTCTTC	21284084	GOBAR_AA27483	21283703	21285949	-	-	-	-	-	-	At_S0001_21284084_1;At_S0001_21284084_2;At_S0001_21284084_3;	-	-	-
At01	At_S0001	p4	TTTATTTATTTATTTATTTATTTA	21284326	GOBAR_AA27483	21283703	21285949	-	-	-	-	-	-	-	-	-	At_S0001_21284326_1;At_S0001_21284326_2;At_S0001_21284326_3;
At01	At_S0001	p6	TTTTTCTTTTTCTTTTTCTTTTTCTTTTTC	22400515	GOBAR_AA02077	22400280	22402929	+	-	-	-	-	-	-	At_S0001_22400515_1;At_S0001_22400515_2;At_S0001_22400515_3;	-	-
At01	At_S0001	p2	TCTCTCTCTCTCTCTCTCTCTC	23574702	GOBAR_AA02638	23572824	23578421	+	GO:0000220|GO:0015078|GO:0015991|GO:0033179|	vacuolar proton-transporting V-type ATPase, V0 domain|hydrogen ion transmembrane transporter activity|ATP hydrolysis coupled proton transport|proton-transporting V-type ATPase, V0 domain|	ko00190|ko04145|ko04142|ko04966|ko04721|ko05323|ko05110|ko05120|ko05152|	Oxidative phosphorylation |Phagosome |Lysosome |Collecting duct acid secretion |Synaptic vesicle cycle |Rheumatoid arthritis |Vibrio cholerae infection |Epithelial cell signaling in Helicobacter pylori infection |Tuberculosis |	K02154	At_S0001_23574702_1;At_S0001_23574702_2;At_S0001_23574702_3;	-	-	-
At01	At_S0001	p6	TCTTCCTCTTCCTCTTCC	23588461	GOBAR_AA02639	23582411	23588847	+	GO:0003824|GO:0006367|GO:0005674|GO:0006366|GO:0006367|	catalytic activity|transcription initiation from RNA polymerase II promoter|transcription factor TFIIF complex|transcription from RNA polymerase II promoter|transcription initiation from RNA polymerase II promoter|	ko03022|	Basal transcription factors |	K03139	-	At_S0001_23588461_1;At_S0001_23588461_2;At_S0001_23588461_3;	-	-
At01	At_S0001	p6	TTTTTCTTTTTCTTTTTC	24842203	GOBAR_AA17056	24839655	24847146	+	-	-	-	-	-	-	-	-	At_S0001_24842203_1;At_S0001_24842203_2;At_S0001_24842203_3;
At01	At_S0001	p3	CTTCTTCTTCTTCTTCTTCTT	25341391	GOBAR_AA29299	25339150	25344476	+	GO:0004601|GO:0050664|GO:0055114|GO:0005509|GO:0016020|GO:0016491|GO:0055114|GO:0016491|GO:0055114|	peroxidase activity|oxidoreductase activity, acting on NAD(P)H, oxygen as acceptor|oxidation-reduction process|calcium ion binding|membrane|oxidoreductase activity|oxidation-reduction process|oxidoreductase activity|oxidation-reduction process|	ko04626|	Plant-pathogen interaction |	K13447	-	At_S0001_25341391_1;At_S0001_25341391_2;At_S0001_25341391_3;	-	-
At01	At_S0001	p6	ATTTTAATTTTAATTTTA	26497672	GOBAR_AA26290	26497029	26499354	+	-	-	-	-	-	-	At_S0001_26497672_1;At_S0001_26497672_2;At_S0001_26497672_3;	-	-
At01	At_S0001	p3	ATGATGATGATGATGATG	26509708	GOBAR_AA26291	26508608	26513716	+	GO:0005488|	binding|	-	-	-	-	At_S0001_26509708_1;At_S0001_26509708_2;At_S0001_26509708_3;	-	-
At01	At_S0001	p6	GGAAGAGGAAGAGGAAGA	26523602	GOBAR_AA26292	26523144	26524106	+	-	-	-	-	-	-	At_S0001_26523602_1;At_S0001_26523602_2;At_S0001_26523602_3;	-	-
At01	At_S0001	p5	AAAAGAAAAGAAAAGAAAAG	26718569	GOBAR_AA14914	26713039	26718712	-	GO:0005669|GO:0006352|GO:0046982|	transcription factor TFIID complex|DNA-templated transcription, initiation|protein heterodimerization activity|	ko03022|ko05016|ko05168|	Basal transcription factors |Huntington's disease |Herpes simplex infection |	-	-	-	At_S0001_26718569_1;At_S0001_26718569_2;At_S0001_26718569_3;	-
At01	At_S0001	p3	TTATTATTATTATTATTATTATTATTATTATTATTATTA	26823501	GOBAR_AA14918	26823358	26824402	+	-	-	-	-	-	At_S0001_26823501_1;At_S0001_26823501_2;At_S0001_26823501_3;	-	-	-
At01	At_S0001	p6	AAATAAAAATAAAAATAA	29514356	GOBAR_AA14779	29513738	29517935	-	-	-	-	-	-	-	-	-	At_S0001_29514356_1;At_S0001_29514356_2;At_S0001_29514356_3;
At01	At_S0001	p6	TTTATTTTTATTTTTATT	30746660	GOBAR_AA24415	30745149	30746939	+	-	-	-	-	-	-	-	-	At_S0001_30746660_1;At_S0001_30746660_2;At_S0001_30746660_3;
At01	At_S0001	p6	AAAATTAAAATTAAAATT	31424385	GOBAR_AA29760	31423626	31425955	+	-	-	-	-	-	At_S0001_31424385_1;At_S0001_31424385_2;At_S0001_31424385_3;	-	-	-
At01	At_S0001	p5	AATAAAATAAAATAAAATAA	32249185	GOBAR_AA22287	32248749	32250646	+	-	-	-	-	-	At_S0001_32249185_1;At_S0001_32249185_2;At_S0001_32249185_3;	-	-	-
At01	At_S0001	p3	AAGAAGAAGAAGAAGAAGAAG	32249724	GOBAR_AA22287	32248749	32250646	+	-	-	-	-	-	-	-	-	At_S0001_32249724_1;At_S0001_32249724_2;At_S0001_32249724_3;
At01	At_S0001	p3	AATAATAATAATAATAATAAT	34498775	GOBAR_AA30324	34492203	34499087	-	GO:0004672|GO:0005524|GO:0006468|GO:0004672|GO:0006468|	protein kinase activity|ATP binding|protein phosphorylation|protein kinase activity|protein phosphorylation|	ko04011|ko04068|ko04071|ko04151|ko04152|ko04150|ko04210|ko04510|ko04660|ko04664|ko04910|ko03320|ko04919|ko04960|ko04722|ko05231|ko05205|ko05215|ko05213|ko05223|ko04931|ko05160|ko05145|	MAPK signaling pathway - yeast |FoxO signaling pathway |Sphingolipid signaling pathway |PI3K-Akt signaling pathway |AMPK signaling pathway |mTOR signaling pathway |Apoptosis |Focal adhesion |T cell receptor signaling pathway |Fc epsilon RI signaling pathway |Insulin signaling pathway |PPAR signaling pathway |Thyroid hormone signaling pathway |Aldosterone-regulated sodium reabsorption |Neurotrophi…	K06276	At_S0001_34498775_1;At_S0001_34498775_2;At_S0001_34498775_3;	-	-	-
At01	At_S0001	p6	CCTGCCCCTGCCCCTGCC	36403128	GOBAR_AA01712	36400973	36403262	+	-	-	-	-	-	-	-	-	At_S0001_36403128_1;At_S0001_36403128_2;At_S0001_36403128_3;
At01	At_S0001	p6	CCTGCCCCTGCCCCTGCC	36404476	GOBAR_AA01713	36403609	36404610	+	-	-	-	-	-	-	-	-	At_S0001_36404476_1;At_S0001_36404476_2;At_S0001_36404476_3;
At01	At_S0001	p3	ATAATAATAATAATAATAATAATA	36626802	GOBAR_AA20639	36614424	36627297	-	GO:0006400|GO:0008479|GO:0008616|GO:0008033|GO:0008479|GO:0008616|	tRNA modification|queuine tRNA-ribosyltransferase activity|queuosine biosynthetic process|tRNA processing|queuine tRNA-ribosyltransferase activity|queuosine biosynthetic process|	-	-	K00773	-	At_S0001_36626802_1;At_S0001_36626802_2;At_S0001_36626802_3;	-	-
At01	At_S0001	p2	GAGAGAGAGAGAGAGAGAGA	37005061	GOBAR_AA07335	37001898	37007359	-	GO:0003824|	catalytic activity|	ko00052|	Galactose metabolism |	K06617	At_S0001_37005061_1;At_S0001_37005061_2;At_S0001_37005061_3;	-	-	-
At01	At_S0001	p3	CATCATCATCATCATCAT	39438834	GOBAR_AA17284	39432918	39441123	-	GO:0007165|	signal transduction|	-	-	-	-	-	At_S0001_39438834_1;At_S0001_39438834_2;At_S0001_39438834_3;	-
At01	At_S0001	p2	CACACACACACACACACACACA	39440876	GOBAR_AA17284	39432918	39441123	-	GO:0007165|	signal transduction|	-	-	-	-	At_S0001_39440876_1;At_S0001_39440876_2;At_S0001_39440876_3;	-	-
At01	At_S0001	p3	CTTCTTCTTCTTCTTCTT	40007981	GOBAR_AA17010	40007962	40009425	+	GO:0030001|GO:0046872|	metal ion transport|metal ion binding|	ko04978|	Mineral absorption |	K07213	-	At_S0001_40007981_1;At_S0001_40007981_2;At_S0001_40007981_3;	-	-
At01	At_S0001	p2	ACACACACACACACACACAC	40376611	GOBAR_AA04354	40373357	40384193	-	GO:0006353|	DNA-templated transcription, termination|	-	-	-	-	At_S0001_40376611_1;At_S0001_40376611_2;At_S0001_40376611_3;	-	-
At01	At_S0001	p2	ACACACACACACACACACAC	40378398	GOBAR_AA04354	40373357	40384193	-	GO:0006353|	DNA-templated transcription, termination|	-	-	-	-	At_S0001_40378398_1;At_S0001_40378398_2;At_S0001_40378398_3;	-	-
At01	At_S0001	p3	AAGAAGAAGAAGAAGAAGAAGAAG	42088625	GOBAR_AA11481	42088402	42089634	+	GO:0000166|GO:0003676|	nucleotide binding|nucleic acid binding|	ko03013|ko03015|ko03018|	RNA transport |mRNA surveillance pathway |RNA degradation |	-	-	At_S0001_42088625_1;At_S0001_42088625_2;At_S0001_42088625_3;	-	-
At01	At_S0001	p6	TCCCCTTCCCCTTCCCCTTCCCCT	43724781	GOBAR_AA11748	43724115	43725249	+	-	-	-	-	-	-	At_S0001_43724781_2;	At_S0001_43724781_1;	At_S0001_43724781_3;
At01	At_S0001	p6	TCCTCTTCCTCTTCCTCT	43785685	GOBAR_AA11749	43785490	43788317	+	GO:0004842|GO:0016567|GO:0005488|GO:0005515|	ubiquitin-protein transferase activity|protein ubiquitination|binding|protein binding|	-	-	-	-	At_S0001_43785685_1;At_S0001_43785685_2;At_S0001_43785685_3;	-	-
At01	At_S0001	p2	TCTCTCTCTCTCTCTCTCTC	44095556	GOBAR_AA07060	44091881	44101547	+	GO:0005524|GO:0016887|GO:0016020|	ATP binding|ATPase activity|membrane|	-	-	-	At_S0001_44095556_1;At_S0001_44095556_2;At_S0001_44095556_3;	-	-	-
At01	At_S0001	p5	ATCATATCATATCATATCAT	44295843	GOBAR_AA07067	44295632	44296587	+	GO:0003700|GO:0006355|GO:0043565|	transcription factor activity, sequence-specific DNA binding|regulation of transcription, DNA-templated|sequence-specific DNA binding|	-	-	-	At_S0001_44295843_1;At_S0001_44295843_2;At_S0001_44295843_3;	-	-	-
At01	At_S0001	p6	AACCTCAACCTCAACCTC	44404946	GOBAR_AA07070	44404472	44405615	+	GO:0003677|GO:0005634|	DNA binding|nucleus|	-	-	-	-	At_S0001_44404946_1;At_S0001_44404946_2;At_S0001_44404946_3;	-	-
At01	At_S0001	p6	AAAATAAAAATAAAAATA	44617046	GOBAR_AA25173	44616413	44619167	-	-	-	-	-	K10843	At_S0001_44617046_1;At_S0001_44617046_2;At_S0001_44617046_3;	-	-	-
At01	At_S0001	p6	AAAATAAAAATAAAAATA	44617656	GOBAR_AA25173	44616413	44619167	-	-	-	-	-	K10843	-	-	-	-
At01	At_S0001	p6	GGTTCGGGTTCGGGTTCG	48140176	GOBAR_AA39610	48139350	48140511	+	-	-	-	-	-	-	At_S0001_48140176_1;At_S0001_48140176_2;At_S0001_48140176_3;	-	-
At01	At_S0001	p6	GGGGCAGGGGCAGGGGCA	50926001	GOBAR_AA11734	50925697	50926213	+	GO:0006855|GO:0015238|GO:0015297|GO:0016020|GO:0055085|	drug transmembrane transport|drug transmembrane transporter activity|antiporter activity|membrane|transmembrane transport|	-	-	K03327	-	At_S0001_50926001_1;At_S0001_50926001_2;At_S0001_50926001_3;	-	-
At01	At_S0001	p6	TTATTGTTATTGTTATTG	50928261	GOBAR_AA11736	50928273	50928563	-	GO:0003735|GO:0005622|GO:0005840|GO:0006412|GO:0003735|GO:0006412|GO:0015934|	structural constituent of ribosome|intracellular|ribosome|translation|structural constituent of ribosome|translation|large ribosomal subunit|	ko03010|	Ribosome |	K02900	At_S0001_50928261_1;At_S0001_50928261_2;At_S0001_50928261_3;	-	-	-
At01	At_S0001	p6	CACCTTCACCTTCACCTT	50937099	GOBAR_AA11737	50935778	50937531	-	GO:0005515|	protein binding|	-	-	-	-	-	At_S0001_50937099_1;At_S0001_50937099_2;At_S0001_50937099_3;	-
At01	At_S0001	p3	TGATGATGATGATGATGATGATGATGA	51362801	GOBAR_AA09943	51362196	51367575	+	-	-	-	-	-	-	At_S0001_51362801_1;At_S0001_51362801_2;At_S0001_51362801_3;	-	-
At01	At_S0001	p2	TGTGTGTGTGTGTGTGTG	51369701	GOBAR_AA09944	51368748	51371371	-	-	-	-	-	-	-	At_S0001_51369701_1;At_S0001_51369701_2;At_S0001_51369701_3;	-	-
At01	At_S0001	p3	TATTATTATTATTATTATTAT	51659234	GOBAR_AA08770	51659147	51671207	+	-	-	-	-	-	-	-	-	-
At01	At_S0001	p3	TATTATTATTATTATTATTAT	51660101	GOBAR_AA08770	51659147	51671207	+	-	-	-	-	-	-	-	-	-
At01	At_S0001	p6	TTAATATTAATATTAATATTAATA	52223121	GOBAR_AA26683	52222544	52226352	+	GO:0000166|	nucleotide binding|	-	-	-	-	-	-	-
At01	At_S0001	p1	TTTTTTTTTTTTTTTTTTTTTTTTTTTTTTTTTTTTTTTTTTTTTTTTTTTTTTTTTTTT	53072419	GOBAR_AA07624	53071164	53073416	+	GO:0005215|GO:0006810|GO:0016020|	transporter activity|transport|membrane|	-	-	-	At_S0001_53072419_1;At_S0001_53072419_2;At_S0001_53072419_3;	-	-	-
At01	At_S0001	p6	CCTCCGCCTCCGCCTCCG	54791778	GOBAR_AA14909	54791554	54792238	-	GO:0003676|GO:0003676|GO:0008270|GO:0003677|GO:0006355|	nucleic acid binding|nucleic acid binding|zinc ion binding|DNA binding|regulation of transcription, DNA-templated|	-	-	-	-	-	-	At_S0001_54791778_1;At_S0001_54791778_2;At_S0001_54791778_3;
At01	At_S0001	p3	AATAATAATAATAATAAT	55106795	GOBAR_AA05780	55105263	55108047	-	-	-	-	-	-	At_S0001_55106795_1;At_S0001_55106795_2;	At_S0001_55106795_3;	-	-
At01	At_S0001	p6	TTTTTATTTTTATTTTTA	55659975	GOBAR_AA04654	55659722	55662076	-	GO:0016020|GO:0016021|GO:0016021|GO:0022857|	membrane|integral component of membrane|integral component of membrane|transmembrane transporter activity|	-	-	-	-	At_S0001_55659975_1;At_S0001_55659975_2;At_S0001_55659975_3;	-	-
At01	At_S0001	p3	ATGATGATGATGATGATG	55855665	GOBAR_AA04648	55853033	55855770	-	-	-	-	-	-	-	At_S0001_55855665_1;At_S0001_55855665_2;At_S0001_55855665_3;	-	-
At01	At_S0001	p3	AAGAAGAAGAAGAAGAAGAAGAAG	55934684	GOBAR_AA30949	55908468	55946749	-	GO:0005319|GO:0016021|GO:0008158|GO:0016020|	lipid transporter activity|integral component of membrane|hedgehog receptor activity|membrane|	ko04142|	Lysosome |	K12385	-	-	At_S0001_55934684_1;At_S0001_55934684_2;At_S0001_55934684_3;	-
At01	At_S0001	p3	ATAATAATAATAATAATA	56019042	GOBAR_AA10575	56010905	56021935	+	GO:0015079|GO:0016020|GO:0071805|	potassium ion transmembrane transporter activity|membrane|potassium ion transmembrane transport|	-	-	K03549	At_S0001_56019042_1;At_S0001_56019042_2;At_S0001_56019042_3;	-	-	-
At01	At_S0001	p3	AAGAAGAAGAAGAAGAAG	56255170	GOBAR_AA10580	56253652	56256479	-	GO:0003677|GO:0046983|	DNA binding|protein dimerization activity|	-	-	-	-	-	-	At_S0001_56255170_1;At_S0001_56255170_2;At_S0001_56255170_3;
At01	At_S0001	p3	CTGCTGCTGCTGCTGCTG	56366979	GOBAR_AA05123	56365051	56367863	+	GO:0000166|GO:0003676|	nucleotide binding|nucleic acid binding|	ko03040|ko05168|	Spliceosome |Herpes simplex infection |	K12890	At_S0001_56366979_1;At_S0001_56366979_2;At_S0001_56366979_3;	-	-	-
At01	At_S0001	p2	GAGAGAGAGAGAGAGAGAGAGA	56369257	GOBAR_AA05124	56368500	56370124	-	GO:0004601|GO:0006979|GO:0020037|GO:0055114|	peroxidase activity|response to oxidative stress|heme binding|oxidation-reduction process|	ko00940|	Phenylpropanoid biosynthesis |	-	-	At_S0001_56369257_1;At_S0001_56369257_2;At_S0001_56369257_3;	-	-
At01	At_S0001	p6	GAAGAGGAAGAGGAAGAG	56993763	GOBAR_AA10072	56993441	56998638	+	GO:0005525|	GTP binding|	-	-	-	-	At_S0001_56993763_1;At_S0001_56993763_2;At_S0001_56993763_3;	-	-
At01	At_S0001	p3	AGAAGAAGAAGAAGAAGA	57644308	GOBAR_AA16829	57633408	57644443	-	GO:0005488|	binding|	-	-	K11267	-	At_S0001_57644308_1;At_S0001_57644308_2;At_S0001_57644308_3;	-	-
At01	At_S0001	p3	TCATCATCATCATCATCATCA	57810251	GOBAR_AA14988	57809542	57815726	-	GO:0008168|GO:0008171|GO:0046983|	methyltransferase activity|O-methyltransferase activity|protein dimerization activity|	ko00940|	Phenylpropanoid biosynthesis |	K05279	-	At_S0001_57810251_1;At_S0001_57810251_2;At_S0001_57810251_3;	-	-
At01	At_S0001	p3	TCATCATCATCATCATCATCA	57811946	GOBAR_AA14988	57809542	57815726	-	GO:0008168|GO:0008171|GO:0046983|	methyltransferase activity|O-methyltransferase activity|protein dimerization activity|	ko00940|	Phenylpropanoid biosynthesis |	K05279	-	At_S0001_57811946_1;At_S0001_57811946_2;At_S0001_57811946_3;	-	-
At01	At_S0001	p3	TCATCATCATCATCATCATCA	57813266	GOBAR_AA14988	57809542	57815726	-	GO:0008168|GO:0008171|GO:0046983|	methyltransferase activity|O-methyltransferase activity|protein dimerization activity|	ko00940|	Phenylpropanoid biosynthesis |	K05279	At_S0001_57813266_1;At_S0001_57813266_2;At_S0001_57813266_3;	-	-	-
At01	At_S0001	p6	GCCGGCGCCGGCGCCGGC	58098747	GOBAR_AA03906	58098196	58100671	-	-	-	-	-	-	-	-	-	At_S0001_58098747_1;At_S0001_58098747_2;At_S0001_58098747_3;
At01	At_S0001	p3	TTATTATTATTATTATTA	58099347	GOBAR_AA03906	58098196	58100671	-	-	-	-	-	-	-	-	-	-
At01	At_S0001	p6	CATCTTCATCTTCATCTT	58150058	GOBAR_AA03909	58149953	58150495	-	-	-	-	-	-	-	At_S0001_58150058_1;At_S0001_58150058_2;At_S0001_58150058_3;	-	-
At01	At_S0001	p3	ACTACTACTACTACTACTACTACTACTACTACTACTACTACTACT	58291733	GOBAR_AA03916	58291517	58311091	+	GO:0003824|GO:0006537|GO:0015930|GO:0016638|GO:0055114|GO:0006807|GO:0015930|GO:0055114|	catalytic activity|glutamate biosynthetic process|glutamate synthase activity|oxidoreductase activity, acting on the CH-NH2 group of donors|oxidation-reduction process|nitrogen compound metabolic process|glutamate synthase activity|oxidation-reduction process|	ko00630|ko00910|	Glyoxylate and dicarboxylate metabolism |Nitrogen metabolism |	K00284	-	-	At_S0001_58291733_1;At_S0001_58291733_2;At_S0001_58291733_3;	-
At01	At_S0001	p4	ATACATACATACATACATAC	58325114	GOBAR_AA03917	58318718	58325621	+	GO:0003824|GO:0006537|GO:0015930|GO:0016638|GO:0055114|GO:0006807|GO:0015930|GO:0055114|	catalytic activity|glutamate biosynthetic process|glutamate synthase activity|oxidoreductase activity, acting on the CH-NH2 group of donors|oxidation-reduction process|nitrogen compound metabolic process|glutamate synthase activity|oxidation-reduction process|	-	-	K00284	-	At_S0001_58325114_1;At_S0001_58325114_2;At_S0001_58325114_3;	-	-
At01	At_S0001	p3	TATTATTATTATTATTATTAT	58327206	GOBAR_AA03918	58326111	58327588	+	GO:0003824|GO:0006537|GO:0015930|GO:0016638|GO:0055114|GO:0006807|GO:0015930|GO:0055114|	catalytic activity|glutamate biosynthetic process|glutamate synthase activity|oxidoreductase activity, acting on the CH-NH2 group of donors|oxidation-reduction process|nitrogen compound metabolic process|glutamate synthase activity|oxidation-reduction process|	ko00630|ko00910|	Glyoxylate and dicarboxylate metabolism |Nitrogen metabolism |	K00284	-	At_S0001_58327206_1;At_S0001_58327206_2;At_S0001_58327206_3;	-	-
At01	At_S0001	p4	AAGAAAGAAAGAAAGAAAGA	58332627	GOBAR_AA03919	58329122	58338186	+	GO:0003824|GO:0006537|GO:0015930|GO:0016638|GO:0055114|GO:0006807|GO:0015930|GO:0055114|GO:0008152|GO:0016491|GO:0055114|	catalytic activity|glutamate biosynthetic process|glutamate synthase activity|oxidoreductase activity, acting on the CH-NH2 group of donors|oxidation-reduction process|nitrogen compound metabolic process|glutamate synthase activity|oxidation-reduction process|metabolic process|oxidoreductase activity|oxidation-reduction process|	-	-	K00284	-	At_S0001_58332627_1;At_S0001_58332627_2;At_S0001_58332627_3;	-	-
At01	At_S0001	p3	TGATGATGATGATGATGATGATGATGATGA	58370400	GOBAR_AA03920	58367145	58372022	-	GO:0005515|	protein binding|	ko04075|	Plant hormone signal transduction |	-	-	At_S0001_58370400_1;At_S0001_58370400_2;At_S0001_58370400_3;	-	-
At01	At_S0001	p5	AGGGAAGGGAAGGGAAGGGAAGGGA	58371521	GOBAR_AA03920	58367145	58372022	-	GO:0005515|	protein binding|	ko04075|	Plant hormone signal transduction |	-	-	At_S0001_58371521_1;At_S0001_58371521_2;At_S0001_58371521_3;	-	-
At01	At_S0001	p3	ATAATAATAATAATAATAATAATAATAATAATAATA	58766806	GOBAR_AA14457	58763527	58767726	-	GO:0009058|GO:0016844|	biosynthetic process|strictosidine synthase activity|	-	-	-	At_S0001_58766806_1;At_S0001_58766806_2;At_S0001_58766806_3;	-	-	-
At01	At_S0001	p2	TCTCTCTCTCTCTCTCTCTCTCTC	58832640	GOBAR_AA14459	58830712	58837986	+	GO:0003700|GO:0006355|GO:0043565|GO:0006351|GO:0043565|	transcription factor activity, sequence-specific DNA binding|regulation of transcription, DNA-templated|sequence-specific DNA binding|transcription, DNA-templated|sequence-specific DNA binding|	ko04075|	Plant hormone signal transduction |	K14431	At_S0001_58832640_1;At_S0001_58832640_2;At_S0001_58832640_3;	-	-	-
At01	At_S0001	p5	TTCTCTTCTCTTCTCTTCTC	58833279	GOBAR_AA14459	58830712	58837986	+	GO:0003700|GO:0006355|GO:0043565|GO:0006351|GO:0043565|	transcription factor activity, sequence-specific DNA binding|regulation of transcription, DNA-templated|sequence-specific DNA binding|transcription, DNA-templated|sequence-specific DNA binding|	ko04075|	Plant hormone signal transduction |	K14431	-	At_S0001_58833279_1;At_S0001_58833279_2;At_S0001_58833279_3;	-	-
At01	At_S0001	p2	ATATATATATATATATAT	58837402	GOBAR_AA14459	58830712	58837986	+	GO:0003700|GO:0006355|GO:0043565|GO:0006351|GO:0043565|	transcription factor activity, sequence-specific DNA binding|regulation of transcription, DNA-templated|sequence-specific DNA binding|transcription, DNA-templated|sequence-specific DNA binding|	ko04075|	Plant hormone signal transduction |	K14431	-	At_S0001_58837402_1;At_S0001_58837402_2;At_S0001_58837402_3;	-	-
At01	At_S0001	p2	TGTGTGTGTGTGTGTGTG	58954217	GOBAR_AA09931	58953212	58956360	-	GO:0004672|GO:0005524|GO:0006468|GO:0004672|GO:0006468|GO:0005515|	protein kinase activity|ATP binding|protein phosphorylation|protein kinase activity|protein phosphorylation|protein binding|	-	-	-	At_S0001_58954217_2;	At_S0001_58954217_1;At_S0001_58954217_3;	-	-
At01	At_S0001	p2	TATATATATATATATATA	59195188	GOBAR_AA35799	59187945	59199040	+	GO:0005488|	binding|	-	-	-	At_S0001_59195188_1;At_S0001_59195188_2;At_S0001_59195188_3;	-	-	-
At01	At_S0001	p3	TGATGATGATGATGATGA	59503004	GOBAR_AA09386	59499265	59504650	-	-	-	-	-	-	-	At_S0001_59503004_1;At_S0001_59503004_2;At_S0001_59503004_3;	-	-
At01	At_S0001	p3	TTATTATTATTATTATTATTATTATTATTATTATTATTATTATTATTATTATTATTA	59859943	GOBAR_AA08614	59858866	59863920	+	GO:0003700|GO:0006355|	transcription factor activity, sequence-specific DNA binding|regulation of transcription, DNA-templated|	ko04612|ko05152|	Antigen processing and presentation |Tuberculosis |	-	-	At_S0001_59859943_1;At_S0001_59859943_2;At_S0001_59859943_3;	-	-
At01	At_S0001	p4	TATGTATGTATGTATGTATG	60266554	GOBAR_AA09671	60265338	60267669	+	GO:0007165|	signal transduction|	-	-	-	At_S0001_60266554_1;At_S0001_60266554_2;At_S0001_60266554_3;	-	-	-
At01	At_S0001	p3	GATGATGATGATGATGATGAT	60290078	GOBAR_AA09668	60289348	60290637	-	-	-	-	-	K11644	-	At_S0001_60290078_1;At_S0001_60290078_2;At_S0001_60290078_3;	-	-
At01	At_S0001	p2	TATATATATATATATATATATA	60337033	GOBAR_AA28241	60332533	60338324	-	GO:0003993|GO:0046872|GO:0016787|	acid phosphatase activity|metal ion binding|hydrolase activity|	-	-	-	-	At_S0001_60337033_1;At_S0001_60337033_2;At_S0001_60337033_3;	-	-
At01	At_S0001	p6	TTTTTCTTTTTCTTTTTC	60356482	GOBAR_AA28239	60354842	60357324	+	GO:0003700|GO:0005634|GO:0009737|GO:0045893|GO:0003700|GO:0006355|GO:0043565|	transcription factor activity, sequence-specific DNA binding|nucleus|response to abscisic acid|positive regulation of transcription, DNA-templated|transcription factor activity, sequence-specific DNA binding|regulation of transcription, DNA-templated|sequence-specific DNA binding|	ko04075|	Plant hormone signal transduction |	K14432	-	At_S0001_60356482_1;At_S0001_60356482_2;At_S0001_60356482_3;	-	-
At01	At_S0001	p3	CATCATCATCATCATCATCAT	60405311	GOBAR_AA28231	60405120	60405740	-	-	-	-	-	-	At_S0001_60405311_3;	At_S0001_60405311_1;At_S0001_60405311_2;	-	-
At01	At_S0001	p3	TTCTTCTTCTTCTTCTTCTTCTTCTTCTTCTTC	60420970	GOBAR_AA28230	60420827	60425805	+	GO:0005515|GO:0009055|GO:0045454|	protein binding|electron carrier activity|cell redox homeostasis|	-	-	-	-	At_S0001_60420970_1;At_S0001_60420970_2;At_S0001_60420970_3;	-	-
At01	At_S0001	p2	AGAGAGAGAGAGAGAGAGAGAG	60584356	GOBAR_AA10905	60573500	60584512	-	GO:0003824|GO:0003824|GO:0005975|GO:0003824|GO:0005975|GO:0043169|GO:0003844|GO:0005978|GO:0004553|GO:0005975|GO:0005975|	catalytic activity|catalytic activity|carbohydrate metabolic process|catalytic activity|carbohydrate metabolic process|cation binding|1,4-alpha-glucan branching enzyme activity|glycogen biosynthetic process|hydrolase activity, hydrolyzing O-glycosyl compounds|carbohydrate metabolic process|carbohydrate metabolic process|	ko00500|	Starch and sucrose metabolism |	K00700	At_S0001_60584356_1;At_S0001_60584356_2;At_S0001_60584356_3;	-	-	-
At01	At_S0001	p3	CATCATCATCATCATCAT	60784880	GOBAR_AA35616	60784842	60785450	-	GO:0003677|GO:0003700|GO:0006355|	DNA binding|transcription factor activity, sequence-specific DNA binding|regulation of transcription, DNA-templated|	-	-	-	-	At_S0001_60784880_3;	-	At_S0001_60784880_1;At_S0001_60784880_2;
At01	At_S0001	p4	ATAAATAAATAAATAAATAA	60802933	GOBAR_AA35615	60802318	60805423	-	-	-	-	-	-	-	-	-	At_S0001_60802933_1;At_S0001_60802933_2;At_S0001_60802933_3;
At01	At_S0001	p4	ATAAATAAATAAATAAATAA	60803210	GOBAR_AA35615	60802318	60805423	-	-	-	-	-	-	At_S0001_60803210_1;	At_S0001_60803210_2;At_S0001_60803210_3;	-	-
At01	At_S0001	p5	TTTATTTTATTTTATTTTAT	60815619	GOBAR_AA35614	60814606	60821640	-	GO:0005524|GO:0006810|GO:0016021|GO:0042626|GO:0055085|GO:0005524|GO:0016887|	ATP binding|transport|integral component of membrane|ATPase activity, coupled to transmembrane movement of substances|transmembrane transport|ATP binding|ATPase activity|	-	-	-	-	-	-	At_S0001_60815619_1;At_S0001_60815619_2;At_S0001_60815619_3;
At01	At_S0001	p5	TTTATTTTATTTTATTTTAT	60820067	GOBAR_AA35614	60814606	60821640	-	GO:0005524|GO:0006810|GO:0016021|GO:0042626|GO:0055085|GO:0005524|GO:0016887|	ATP binding|transport|integral component of membrane|ATPase activity, coupled to transmembrane movement of substances|transmembrane transport|ATP binding|ATPase activity|	-	-	-	At_S0001_60820067_1;At_S0001_60820067_2;At_S0001_60820067_3;	-	-	-
At01	At_S0001	p6	AAAAAGAAAAAGAAAAAGAAAAAG	61049984	GOBAR_AA31511	61045422	61050181	-	GO:0046872|	metal ion binding|	-	-	-	-	At_S0001_61049984_1;At_S0001_61049984_2;At_S0001_61049984_3;	-	-
At01	At_S0001	p6	AACATCAACATCAACATCAACATC	61082162	GOBAR_AA37989	61081042	61084982	-	-	-	-	-	K06966	At_S0001_61082162_1;At_S0001_61082162_2;At_S0001_61082162_3;	-	-	-
At01	At_S0001	p3	CATCATCATCATCATCATCAT	61639496	GOBAR_AA28168	61634491	61643313	+	-	-	-	-	-	At_S0001_61639496_1;At_S0001_61639496_2;At_S0001_61639496_3;	-	-	-
At01	At_S0001	p3	TTCTTCTTCTTCTTCTTCTTCTTC	61639689	GOBAR_AA28168	61634491	61643313	+	-	-	-	-	-	-	At_S0001_61639689_1;At_S0001_61639689_2;At_S0001_61639689_3;	-	-
At01	At_S0001	p6	AAAAACAAAAACAAAAAC	61649095	GOBAR_AA28169	61645656	61649688	-	GO:0004672|GO:0005524|GO:0006468|GO:0004672|GO:0006468|GO:0005524|	protein kinase activity|ATP binding|protein phosphorylation|protein kinase activity|protein phosphorylation|ATP binding|	-	-	K08832	-	At_S0001_61649095_1;At_S0001_61649095_2;At_S0001_61649095_3;	-	-
At01	At_S0001	p3	TCATCATCATCATCATCATCATCATCATCATCATCATCATCATCA	61698165	GOBAR_AA28173	61697735	61699114	-	-	-	-	-	-	-	-	-	At_S0001_61698165_1;At_S0001_61698165_2;At_S0001_61698165_3;
At01	At_S0001	p2	ACACACACACACACACACACAC	61740397	GOBAR_AA32167	61736993	61745733	-	GO:0005515|GO:0005515|GO:0008270|	protein binding|protein binding|zinc ion binding|	-	-	-	At_S0001_61740397_1;At_S0001_61740397_2;At_S0001_61740397_3;	-	-	-
At01	At_S0001	p4	TTTATTTATTTATTTATTTA	61873965	GOBAR_AA03299	61872555	61874894	+	GO:0005524|GO:0016308|GO:0016307|GO:0046488|	ATP binding|1-phosphatidylinositol-4-phosphate 5-kinase activity|phosphatidylinositol phosphate kinase activity|phosphatidylinositol metabolic process|	-	-	K00889	-	At_S0001_61873965_1;At_S0001_61873965_2;At_S0001_61873965_3;	-	-
At01	At_S0001	p2	GTGTGTGTGTGTGTGTGTGTGT	61923307	GOBAR_AA03293	61921394	61923797	-	GO:0004089|GO:0006730|GO:0008270|	carbonate dehydratase activity|one-carbon metabolic process|zinc ion binding|	ko00910|	Nitrogen metabolism |	K01674	-	-	At_S0001_61923307_1;At_S0001_61923307_2;At_S0001_61923307_3;	-
At01	At_S0001	p6	AAATTTAAATTTAAATTT	61962482	GOBAR_AA03288	61959983	61969685	-	-	-	-	-	-	At_S0001_61962482_1;At_S0001_61962482_2;At_S0001_61962482_3;	-	-	-
At01	At_S0001	p4	TGTATGTATGTATGTATGTATGTA	61976597	GOBAR_AA03287	61976448	61977362	+	GO:0003677|	DNA binding|	-	-	K09422	-	At_S0001_61976597_1;At_S0001_61976597_2;At_S0001_61976597_3;	-	-
At01	At_S0001	p6	AGAAGGAGAAGGAGAAGG	62086330	GOBAR_AA03280	62086063	62086409	-	GO:0003743|GO:0006413|GO:0005488|GO:0005515|	translation initiation factor activity|translational initiation|binding|protein binding|	ko03013|ko04214|	RNA transport |Apoptosis -fly |	K03262	At_S0001_62086330_1;At_S0001_62086330_2;At_S0001_62086330_3;	-	-	-
At01	At_S0001	p3	TCCTCCTCCTCCTCCTCC	62145925	GOBAR_AA03274	62145537	62147819	-	GO:0005515|	protein binding|	-	-	-	At_S0001_62145925_1;	At_S0001_62145925_2;At_S0001_62145925_3;	-	-
At01	At_S0001	p6	TCATCCTCATCCTCATCC	62349444	GOBAR_AA29155	62347547	62351527	-	-	-	-	-	-	-	-	At_S0001_62349444_1;At_S0001_62349444_2;At_S0001_62349444_3;	-
At01	At_S0001	p6	TCATCCTCATCCTCATCCTCATCC	62350845	GOBAR_AA29155	62347547	62351527	-	-	-	-	-	-	-	-	At_S0001_62350845_1;At_S0001_62350845_2;At_S0001_62350845_3;	-
At01	At_S0001	p2	ATATATATATATATATAT	62404340	GOBAR_AA29162	62401897	62405048	-	GO:0003677|GO:0003700|GO:0006355|GO:0003700|GO:0006355|GO:0007275|	DNA binding|transcription factor activity, sequence-specific DNA binding|regulation of transcription, DNA-templated|transcription factor activity, sequence-specific DNA binding|regulation of transcription, DNA-templated|multicellular organism development|	-	-	K09284	-	-	At_S0001_62404340_1;At_S0001_62404340_2;At_S0001_62404340_3;	-
At01	At_S0001	p2	TATATATATATATATATA	62700531	GOBAR_AA37461	62698189	62703903	-	GO:0006812|GO:0015299|GO:0016021|GO:0055085|	cation transport|solute:proton antiporter activity|integral component of membrane|transmembrane transport|	-	-	-	At_S0001_62700531_1;At_S0001_62700531_2;At_S0001_62700531_3;	-	-	-
At01	At_S0001	p3	ACAACAACAACAACAACA	62755543	GOBAR_AA33911	62755230	62759373	+	GO:0003677|GO:0003677|GO:0006355|	DNA binding|DNA binding|regulation of transcription, DNA-templated|	-	-	-	-	At_S0001_62755543_1;At_S0001_62755543_2;At_S0001_62755543_3;	-	-
At01	At_S0001	p5	AAAATAAAATAAAATAAAAT	62768630	GOBAR_AA33913	62768100	62772540	-	GO:0005215|GO:0006810|GO:0016020|	transporter activity|transport|membrane|	-	-	-	-	At_S0001_62768630_1;At_S0001_62768630_2;At_S0001_62768630_3;	-	-
At01	At_S0001	p5	AAAATAAAATAAAATAAAAT	62768804	GOBAR_AA33913	62768100	62772540	-	GO:0005215|GO:0006810|GO:0016020|	transporter activity|transport|membrane|	-	-	-	At_S0001_62768804_1;At_S0001_62768804_2;At_S0001_62768804_3;	-	-	-
At01	At_S0001	p1	AAAAAAAAAAAAAAAAAAAA	62769376	GOBAR_AA33913	62768100	62772540	-	GO:0005215|GO:0006810|GO:0016020|	transporter activity|transport|membrane|	-	-	-	-	-	-	At_S0001_62769376_1;At_S0001_62769376_2;At_S0001_62769376_3;
At01	At_S0001	p4	ATACATACATACATACATAC	62772114	GOBAR_AA33913	62768100	62772540	-	GO:0005215|GO:0006810|GO:0016020|	transporter activity|transport|membrane|	-	-	-	At_S0001_62772114_1;At_S0001_62772114_2;At_S0001_62772114_3;	-	-	-
At01	At_S0001	p6	TGTTTTTGTTTTTGTTTT	62789961	GOBAR_AA33915	62789149	62799420	+	GO:0004349|GO:0006561|GO:0005737|GO:0006561|GO:0006561|GO:0008152|GO:0016491|GO:0016620|GO:0055114|GO:0008152|GO:0016491|GO:0055114|	glutamate 5-kinase activity|proline biosynthetic process|cytoplasm|proline biosynthetic process|proline biosynthetic process|metabolic process|oxidoreductase activity|oxidoreductase activity, acting on the aldehyde or oxo group of donors, NAD or NADP as acceptor|oxidation-reduction process|metabolic process|oxidoreductase activity|oxidation-reduction process|	-	-	K12657	-	At_S0001_62789961_1;At_S0001_62789961_2;At_S0001_62789961_3;	-	-
At01	At_S0001	p4	ATGTATGTATGTATGTATGTATGT	62793240	GOBAR_AA33915	62789149	62799420	+	GO:0004349|GO:0006561|GO:0005737|GO:0006561|GO:0006561|GO:0008152|GO:0016491|GO:0016620|GO:0055114|GO:0008152|GO:0016491|GO:0055114|	glutamate 5-kinase activity|proline biosynthetic process|cytoplasm|proline biosynthetic process|proline biosynthetic process|metabolic process|oxidoreductase activity|oxidoreductase activity, acting on the aldehyde or oxo group of donors, NAD or NADP as acceptor|oxidation-reduction process|metabolic process|oxidoreductase activity|oxidation-reduction process|	-	-	K12657	-	-	At_S0001_62793240_1;At_S0001_62793240_2;At_S0001_62793240_3;	-
At01	At_S0001	p2	TATATATATATATATATA	62797110	GOBAR_AA33915	62789149	62799420	+	GO:0004349|GO:0006561|GO:0005737|GO:0006561|GO:0006561|GO:0008152|GO:0016491|GO:0016620|GO:0055114|GO:0008152|GO:0016491|GO:0055114|	glutamate 5-kinase activity|proline biosynthetic process|cytoplasm|proline biosynthetic process|proline biosynthetic process|metabolic process|oxidoreductase activity|oxidoreductase activity, acting on the aldehyde or oxo group of donors, NAD or NADP as acceptor|oxidation-reduction process|metabolic process|oxidoreductase activity|oxidation-reduction process|	-	-	K12657	At_S0001_62797110_1;At_S0001_62797110_2;At_S0001_62797110_3;	-	-	-
At01	At_S0001	p4	ATGTATGTATGTATGTATGTATGTATGT	62797649	GOBAR_AA33915	62789149	62799420	+	GO:0004349|GO:0006561|GO:0005737|GO:0006561|GO:0006561|GO:0008152|GO:0016491|GO:0016620|GO:0055114|GO:0008152|GO:0016491|GO:0055114|	glutamate 5-kinase activity|proline biosynthetic process|cytoplasm|proline biosynthetic process|proline biosynthetic process|metabolic process|oxidoreductase activity|oxidoreductase activity, acting on the aldehyde or oxo group of donors, NAD or NADP as acceptor|oxidation-reduction process|metabolic process|oxidoreductase activity|oxidation-reduction process|	-	-	K12657	-	-	At_S0001_62797649_1;At_S0001_62797649_2;At_S0001_62797649_3;	-
At01	At_S0001	p6	TATGTATATGTATATGTA	62880279	GOBAR_AA35833	62879872	62886853	-	-	-	-	-	-	At_S0001_62880279_1;At_S0001_62880279_2;At_S0001_62880279_3;	-	-	-
At01	At_S0001	p3	TGCTGCTGCTGCTGCTGC	62884158	GOBAR_AA35833	62879872	62886853	-	-	-	-	-	-	-	-	At_S0001_62884158_1;At_S0001_62884158_2;At_S0001_62884158_3;	-
At01	At_S0001	p6	CTTGAACTTGAACTTGAA	62915277	GOBAR_AA35838	62915083	62915523	-	GO:0003676|GO:0046872|	nucleic acid binding|metal ion binding|	-	-	-	At_S0001_62915277_1;At_S0001_62915277_2;At_S0001_62915277_3;	-	-	-
At01	At_S0001	p4	TTAATTAATTAATTAATTAATTAA	62941633	GOBAR_AA34165	62941540	62943423	+	GO:0008152|GO:0016787|	metabolic process|hydrolase activity|	-	-	K07025	-	At_S0001_62941633_1;At_S0001_62941633_2;At_S0001_62941633_3;	-	-
At01	At_S0001	p5	AAATTAAATTAAATTAAATTAAATT	63025189	GOBAR_AA40091	63022514	63027735	-	GO:0005515|	protein binding|	-	-	-	-	At_S0001_63025189_1;At_S0001_63025189_2;At_S0001_63025189_3;	-	-
At01	At_S0001	p3	GGTGGTGGTGGTGGTGGTGGT	63027302	GOBAR_AA40091	63022514	63027735	-	GO:0005515|	protein binding|	-	-	-	At_S0001_63027302_1;At_S0001_63027302_2;At_S0001_63027302_3;	-	-	-
At01	At_S0001	p2	CACACACACACACACACA	63111667	GOBAR_AA22398	63109365	63111984	-	GO:0005089|	Rho guanyl-nucleotide exchange factor activity|	-	-	-	-	At_S0001_63111667_1;At_S0001_63111667_2;At_S0001_63111667_3;	-	-
At01	At_S0001	p6	AAAGAAAAAGAAAAAGAA	63366549	GOBAR_AA25488	63365726	63368751	+	-	-	-	-	-	At_S0001_63366549_3;	At_S0001_63366549_1;	At_S0001_63366549_2;	-
At01	At_S0001	p4	TGTATGTATGTATGTATGTATGTATGTATGTATGTA	63588987	GOBAR_AA35912	63588015	63594783	+	GO:0004672|GO:0005524|GO:0006468|GO:0004672|GO:0006468|GO:0005524|	protein kinase activity|ATP binding|protein phosphorylation|protein kinase activity|protein phosphorylation|ATP binding|	-	-	-	At_S0001_63588987_1;At_S0001_63588987_2;At_S0001_63588987_3;	-	-	-
At01	At_S0001	p6	TATATGTATATGTATATGTATATG	63731210	GOBAR_AA24079	63730696	63732379	+	GO:0003677|	DNA binding|	-	-	-	-	At_S0001_63731210_1;At_S0001_63731210_2;At_S0001_63731210_3;	-	-
At01	At_S0001	p3	TCATCATCATCATCATCA	63731409	GOBAR_AA24079	63730696	63732379	+	GO:0003677|	DNA binding|	-	-	-	-	At_S0001_63731409_1;At_S0001_63731409_2;At_S0001_63731409_3;	-	-
At01	At_S0001	p3	TCATCATCATCATCATCATCA	63802311	GOBAR_AA40920	63801456	63803251	-	GO:0009269|	response to desiccation|	-	-	-	At_S0001_63802311_1;At_S0001_63802311_2;At_S0001_63802311_3;	-	-	-
At02	At_S0566	p6	AAAAAGAAAAAGAAAAAGAAAAAGAAAAAG	10024	GOBAR_AA22330	3983	16698	+	GO:0004672|GO:0005524|GO:0006468|GO:0004672|GO:0006468|GO:0005524|	protein kinase activity|ATP binding|protein phosphorylation|protein kinase activity|protein phosphorylation|ATP binding|	ko04068|ko04151|ko04110|ko04114|ko04115|ko04914|ko05200|ko05203|ko05215|ko05222|ko05162|ko05161|ko05168|ko05169|	FoxO signaling pathway |PI3K-Akt signaling pathway |Cell cycle |Oocyte meiosis |p53 signaling pathway |Progesterone-mediated oocyte maturation |Pathways in cancer |Viral carcinogenesis |Prostate cancer |Small cell lung cancer |Measles |Hepatitis B |Herpes simplex infection |Epstein-Barr virus infection |	K02206	At_S0566_10024_1;At_S0566_10024_2;At_S0566_10024_3;	-	-	-
At02	At_S0623	p6	GGTGCTGGTGCTGGTGCT	24059	GOBAR_AA24866	24049	27868	-	GO:0004672|GO:0005524|GO:0006468|GO:0004672|GO:0006468|GO:0004713|GO:0006468|GO:0005524|	protein kinase activity|ATP binding|protein phosphorylation|protein kinase activity|protein phosphorylation|protein tyrosine kinase activity|protein phosphorylation|ATP binding|	ko04626|	Plant-pathogen interaction |	-	At_S0623_24059_1;At_S0623_24059_2;At_S0623_24059_3;	-	-	-
At02	At_S0378	p3	TCTTCTTCTTCTTCTTCT	25423	GOBAR_AA14596	22472	26500	+	GO:0016020|GO:0016021|GO:0016021|GO:0022857|	membrane|integral component of membrane|integral component of membrane|transmembrane transporter activity|	-	-	-	At_S0378_25423_1;At_S0378_25423_2;At_S0378_25423_3;	-	-	-
At02	At_S0508	p2	TCTCTCTCTCTCTCTCTCTCTC	35930	GOBAR_AA20150	34993	38875	-	-	-	-	-	-	At_S0508_35930_1;At_S0508_35930_3;	At_S0508_35930_2;	-	-
At02	At_S0287	p4	TTTATTTATTTATTTATTTATTTATTTATTTA	36123	GOBAR_AA10859	34391	42440	+	GO:0003677|GO:0005634|GO:0005515|	DNA binding|nucleus|protein binding|	-	-	-	At_S0287_36123_2;	-	-	At_S0287_36123_1;At_S0287_36123_3;
At02	At_S0508	p3	TAATAATAATAATAATAATAA	37546	GOBAR_AA20150	34993	38875	-	-	-	-	-	-	-	-	-	-
At02	At_S0508	p6	CGAATCCGAATCCGAATC	38405	GOBAR_AA20150	34993	38875	-	-	-	-	-	-	At_S0508_38405_1;At_S0508_38405_2;At_S0508_38405_3;	-	-	-
At02	At_S0164	p3	GAGGAGGAGGAGGAGGAG	38972	GOBAR_AA06066	38741	39238	+	GO:0005509|	calcium ion binding|	ko04626|	Plant-pathogen interaction |	K13448	-	At_S0164_38972_1;At_S0164_38972_2;At_S0164_38972_3;	-	-
At02	At_S0566	p4	AGATAGATAGATAGATAGATAGAT	40427	GOBAR_AA22333	38445	44089	-	GO:0016021|GO:0055085|	integral component of membrane|transmembrane transport|	-	-	-	-	-	At_S0566_40427_1;At_S0566_40427_2;At_S0566_40427_3;	-
At02	At_S0566	p4	AGATAGATAGATAGATAGATAGAT	41792	GOBAR_AA22333	38445	44089	-	GO:0016021|GO:0055085|	integral component of membrane|transmembrane transport|	-	-	-	-	-	At_S0566_41792_1;At_S0566_41792_2;At_S0566_41792_3;	-
At02	At_S0411	p2	TATATATATATATATATATATATA	81147	GOBAR_AA15785	80640	82702	+	GO:0003677|GO:0006355|GO:0043565|	DNA binding|regulation of transcription, DNA-templated|sequence-specific DNA binding|	-	-	K09338	At_S0411_81147_1;At_S0411_81147_2;At_S0411_81147_3;	-	-	-
At02	At_S0232	p2	AGAGAGAGAGAGAGAGAGAG	87489	GOBAR_AA09115	85192	90231	-	GO:0006457|GO:0015031|	protein folding|protein transport|	-	-	-	At_S0232_87489_1;At_S0232_87489_2;At_S0232_87489_3;	-	-	-
At02	At_S0385	p4	AAACAAACAAACAAACAAAC	116801	GOBAR_AA14746	106507	121332	-	GO:2000028|	regulation of photoperiodism, flowering|	ko04712|	Circadian rhythm - plant |	K12124	-	At_S0385_116801_2;At_S0385_116801_3;	At_S0385_116801_1;	-
At02	At_S0426	p6	GCAATGGCAATGGCAATGGCAATG	139851	GOBAR_AA16542	138834	139938	+	GO:0030001|GO:0046872|	metal ion transport|metal ion binding|	-	-	-	-	At_S0426_139851_1;At_S0426_139851_2;At_S0426_139851_3;	-	-
At02	At_S0411	p3	CGGCGGCGGCGGCGGCGG	142216	GOBAR_AA15789	141466	142530	-	-	-	-	-	-	-	At_S0411_142216_1;At_S0411_142216_2;At_S0411_142216_3;	-	-
At02	At_S0002	p2	CTCTCTCTCTCTCTCTCT	176208	GOBAR_AA12126	175083	177257	+	GO:0003700|GO:0006355|GO:0043565|	transcription factor activity, sequence-specific DNA binding|regulation of transcription, DNA-templated|sequence-specific DNA binding|	-	-	-	At_S0002_176208_3;	At_S0002_176208_1;At_S0002_176208_2;	-	-
At02	At_S0002	p2	ACACACACACACACACAC	349348	GOBAR_AA12148	348318	350464	-	-	-	-	-	-	At_S0002_349348_1;At_S0002_349348_2;At_S0002_349348_3;	-	-	-
At02	At_S0002	p4	ATCCATCCATCCATCCATCC	445476	GOBAR_AA36574	443237	447862	-	GO:0003824|GO:0008152|GO:0003824|GO:0046872|GO:0004619|GO:0005737|GO:0006007|GO:0030145|GO:0004619|GO:0006007|	catalytic activity|metabolic process|catalytic activity|metal ion binding|phosphoglycerate mutase activity|cytoplasm|glucose catabolic process|manganese ion binding|phosphoglycerate mutase activity|glucose catabolic process|	ko01200|ko01230|ko00010|ko00680|ko00260|	Carbon metabolism |Biosynthesis of amino acids |Glycolysis / Gluconeogenesis |Methane metabolism |Glycine, serine and threonine metabolism |	K15633	-	At_S0002_445476_1;At_S0002_445476_2;At_S0002_445476_3;	-	-
At02	At_S0002	p4	ATCCATCCATCCATCCATCC	446517	GOBAR_AA36574	443237	447862	-	GO:0003824|GO:0008152|GO:0003824|GO:0046872|GO:0004619|GO:0005737|GO:0006007|GO:0030145|GO:0004619|GO:0006007|	catalytic activity|metabolic process|catalytic activity|metal ion binding|phosphoglycerate mutase activity|cytoplasm|glucose catabolic process|manganese ion binding|phosphoglycerate mutase activity|glucose catabolic process|	ko01200|ko01230|ko00010|ko00680|ko00260|	Carbon metabolism |Biosynthesis of amino acids |Glycolysis / Gluconeogenesis |Methane metabolism |Glycine, serine and threonine metabolism |	K15633	At_S0002_446517_1;At_S0002_446517_2;At_S0002_446517_3;	-	-	-
At02	At_S0002	p2	TGTGTGTGTGTGTGTGTGTG	463743	GOBAR_AA36571	461409	467810	-	GO:0005515|	protein binding|	-	-	-	-	-	At_S0002_463743_1;At_S0002_463743_2;At_S0002_463743_3;	-
At02	At_S0002	p6	CATATACATATACATATACATATA	466294	GOBAR_AA36571	461409	467810	-	GO:0005515|	protein binding|	-	-	-	-	At_S0002_466294_1;At_S0002_466294_2;At_S0002_466294_3;	-	-
At02	At_S0002	p6	ATGGGGATGGGGATGGGG	756770	GOBAR_AA34737	749386	756934	+	-	-	ko04144|	Endocytosis |	K12471	-	At_S0002_756770_1;At_S0002_756770_2;At_S0002_756770_3;	-	-
At02	At_S0002	p3	TTCTTCTTCTTCTTCTTCTTCTTCTTC	852740	GOBAR_AA16547	852064	855829	+	GO:0003677|GO:0006355|	DNA binding|regulation of transcription, DNA-templated|	-	-	-	-	At_S0002_852740_1;At_S0002_852740_2;At_S0002_852740_3;	-	-
At02	At_S0002	p3	TCTTCTTCTTCTTCTTCT	866081	GOBAR_AA16548	859763	867649	-	GO:0005515|GO:0005524|	protein binding|ATP binding|	-	-	-	-	At_S0002_866081_2;At_S0002_866081_3;	At_S0002_866081_1;	-
At02	At_S0002	p6	GTGCTGGTGCTGGTGCTG	966958	GOBAR_AA16558	964520	967252	-	GO:0003676|	nucleic acid binding|	-	-	-	-	At_S0002_966958_1;At_S0002_966958_2;At_S0002_966958_3;	-	-
At02	At_S0002	p3	TCTTCTTCTTCTTCTTCTTCT	1315004	GOBAR_AA28364	1314878	1318769	+	GO:0005515|GO:0008430|	protein binding|selenium binding|	-	-	-	-	At_S0002_1315004_1;At_S0002_1315004_2;At_S0002_1315004_3;	-	-
At02	At_S0002	p3	GAAGAAGAAGAAGAAGAA	1337476	GOBAR_AA28369	1337103	1337554	+	-	-	-	-	-	-	-	At_S0002_1337476_1;At_S0002_1337476_2;At_S0002_1337476_3;	-
At02	At_S0002	p2	AGAGAGAGAGAGAGAGAG	1420192	GOBAR_AA14813	1412509	1424331	-	GO:0000723|GO:0005634|GO:0006281|GO:0016887|GO:0030870|	telomere maintenance|nucleus|DNA repair|ATPase activity|Mre11 complex|	ko03440|ko03450|	Homologous recombination |Non-homologous end-joining |	K10866	-	-	At_S0002_1420192_1;At_S0002_1420192_2;At_S0002_1420192_3;	-
At02	At_S0002	p2	AGAGAGAGAGAGAGAGAG	1421681	GOBAR_AA14813	1412509	1424331	-	GO:0000723|GO:0005634|GO:0006281|GO:0016887|GO:0030870|	telomere maintenance|nucleus|DNA repair|ATPase activity|Mre11 complex|	ko03440|ko03450|	Homologous recombination |Non-homologous end-joining |	K10866	-	-	At_S0002_1421681_1;At_S0002_1421681_2;At_S0002_1421681_3;	-
At02	At_S0002	p5	TTATTTTATTTTATTTTATT	1490855	GOBAR_AA14821	1488571	1492179	+	GO:0015095|GO:0015693|GO:0016021|	magnesium ion transmembrane transporter activity|magnesium ion transport|integral component of membrane|	-	-	-	-	At_S0002_1490855_1;At_S0002_1490855_2;At_S0002_1490855_3;	-	-
At02	At_S0002	p6	TATATTTATATTTATATT	1516533	GOBAR_AA14822	1516383	1518563	+	GO:0003677|GO:0005634|	DNA binding|nucleus|	-	-	-	-	-	At_S0002_1516533_1;At_S0002_1516533_2;At_S0002_1516533_3;	-
At02	At_S0002	p6	ACATGTACATGTACATGT	1675425	GOBAR_AA33136	1674848	1676643	-	-	-	-	-	-	At_S0002_1675425_1;At_S0002_1675425_2;At_S0002_1675425_3;	-	-	-
At02	At_S0002	p1	AAAAAAAAAAAAAAAAAA	2196651	GOBAR_AA28321	2193240	2196942	+	-	-	-	-	-	-	At_S0002_2196651_1;At_S0002_2196651_2;At_S0002_2196651_3;	-	-
At02	At_S0002	p3	CCACCACCACCACCACCA	2200976	GOBAR_AA28322	2200645	2203898	-	-	-	-	-	-	-	At_S0002_2200976_1;At_S0002_2200976_2;At_S0002_2200976_3;	-	-
At02	At_S0002	p6	CTTTAGCTTTAGCTTTAG	2201264	GOBAR_AA28322	2200645	2203898	-	-	-	-	-	-	-	-	-	At_S0002_2201264_1;At_S0002_2201264_2;At_S0002_2201264_3;
At02	At_S0002	p3	ACCACCACCACCACCACC	2202954	GOBAR_AA28322	2200645	2203898	-	-	-	-	-	-	At_S0002_2202954_3;	At_S0002_2202954_1;At_S0002_2202954_2;	-	-
At02	At_S0002	p3	CACCACCACCACCACCACCAC	2203556	GOBAR_AA28322	2200645	2203898	-	-	-	-	-	-	At_S0002_2203556_1;At_S0002_2203556_2;	At_S0002_2203556_3;	-	-
At02	At_S0002	p6	TTCAGCTTCAGCTTCAGC	2245029	GOBAR_AA34644	2244633	2247569	-	-	-	-	-	-	-	At_S0002_2245029_1;At_S0002_2245029_2;	At_S0002_2245029_3;	-
At02	At_S0002	p3	CCTCCTCCTCCTCCTCCTCCT	2247226	GOBAR_AA34644	2244633	2247569	-	-	-	-	-	-	At_S0002_2247226_2;At_S0002_2247226_3;	At_S0002_2247226_1;	-	-
At02	At_S0002	p1	AAAAAAAAAAAAAAAAAAAA	2394025	GOBAR_AA24371	2390782	2394792	-	GO:0005515|	protein binding|	-	-	K12621	At_S0002_2394025_2;At_S0002_2394025_3;	At_S0002_2394025_1;	-	-
At02	At_S0002	p6	AAAGAAAAAGAAAAAGAA	2449276	GOBAR_AA24366	2440630	2454328	-	GO:0005515|GO:0006629|	protein binding|lipid metabolic process|	-	-	-	-	-	-	At_S0002_2449276_1;At_S0002_2449276_2;At_S0002_2449276_3;
At02	At_S0002	p6	AAAGAAAAAGAAAAAGAA	2451073	GOBAR_AA24366	2440630	2454328	-	GO:0005515|GO:0006629|	protein binding|lipid metabolic process|	-	-	-	-	-	-	At_S0002_2451073_1;At_S0002_2451073_2;At_S0002_2451073_3;
At02	At_S0002	p3	TCTTCTTCTTCTTCTTCT	2454072	GOBAR_AA24366	2440630	2454328	-	GO:0005515|GO:0006629|	protein binding|lipid metabolic process|	-	-	-	-	-	At_S0002_2454072_1;At_S0002_2454072_2;At_S0002_2454072_3;	-
At02	At_S0002	p6	CATGGACATGGACATGGA	2690879	GOBAR_AA34200	2690210	2691148	+	-	-	-	-	-	At_S0002_2690879_1;At_S0002_2690879_2;At_S0002_2690879_3;	-	-	-
At02	At_S0002	p6	CTCCCTCTCCCTCTCCCT	2721939	GOBAR_AA34202	2721496	2726020	-	-	-	-	-	K12819	-	-	-	At_S0002_2721939_1;At_S0002_2721939_2;At_S0002_2721939_3;
At02	At_S0002	p3	TAATAATAATAATAATAATAA	2723880	GOBAR_AA34202	2721496	2726020	-	-	-	-	-	K12819	-	-	-	-
At02	At_S0002	p3	CATCATCATCATCATCATCAT	2848608	GOBAR_AA18451	2845796	2848993	-	-	-	-	-	-	-	At_S0002_2848608_1;At_S0002_2848608_2;At_S0002_2848608_3;	-	-
At02	At_S0002	p1	CCCCCCCCCCCCCCCCCCCCCCC	2903181	GOBAR_AA18459	2900753	2909277	+	GO:0003824|GO:0004721|GO:0004722|GO:0006470|GO:0005515|GO:0043169|	catalytic activity|phosphoprotein phosphatase activity|protein serine/threonine phosphatase activity|protein dephosphorylation|protein binding|cation binding|	-	-	-	-	-	-	-
At02	At_S0002	p4	AAATAAATAAATAAATAAAT	2999294	GOBAR_AA18470	2998705	3000087	-	-	-	-	-	-	-	At_S0002_2999294_3;	At_S0002_2999294_1;At_S0002_2999294_2;	-
At02	At_S0002	p3	AATAATAATAATAATAATAAT	2999415	GOBAR_AA18470	2998705	3000087	-	-	-	-	-	-	-	At_S0002_2999415_1;At_S0002_2999415_2;At_S0002_2999415_3;	-	-
At02	At_S0002	p3	TTCTTCTTCTTCTTCTTCTTCTTCTTCTTCTTCTTCTTCTTC	3024268	GOBAR_AA18471	3022666	3025419	+	GO:0004672|GO:0005524|GO:0006468|GO:0004672|GO:0006468|	protein kinase activity|ATP binding|protein phosphorylation|protein kinase activity|protein phosphorylation|	-	-	K12132	At_S0002_3024268_1;At_S0002_3024268_2;At_S0002_3024268_3;	-	-	-
At02	At_S0002	p6	TAAAAATAAAAATAAAAA	3068569	GOBAR_AA24774	3067578	3073809	-	GO:0000148|GO:0003843|GO:0006075|GO:0016020|	1,3-beta-D-glucan synthase complex|1,3-beta-D-glucan synthase activity|(1->3)-beta-D-glucan biosynthetic process|membrane|	-	-	K11000	-	-	At_S0002_3068569_1;At_S0002_3068569_2;At_S0002_3068569_3;	-
At02	At_S0002	p6	TTAAATTTAAATTTAAAT	3244209	GOBAR_AA38858	3243399	3245765	+	GO:0016491|GO:0055114|	oxidoreductase activity|oxidation-reduction process|	-	-	-	-	-	-	-
At02	At_S0002	p6	TTAGTTTTAGTTTTAGTT	3257192	GOBAR_AA22758	3256389	3258081	+	GO:0016491|GO:0055114|	oxidoreductase activity|oxidation-reduction process|	-	-	-	-	-	-	-
At02	At_S0002	p6	AAAATAAAAATAAAAATA	3377737	GOBAR_AA22779	3377441	3381224	-	GO:0000166|GO:0003677|GO:0005524|GO:0005634|GO:0007131|GO:0008094|GO:0003677|GO:0005524|GO:0006259|GO:0008094|GO:0003677|GO:0005524|GO:0006281|GO:0008094|	nucleotide binding|DNA binding|ATP binding|nucleus|reciprocal meiotic recombination|DNA-dependent ATPase activity|DNA binding|ATP binding|DNA metabolic process|DNA-dependent ATPase activity|DNA binding|ATP binding|DNA repair|DNA-dependent ATPase activity|	ko04113|	Meiosis - yeast |	K10872	At_S0002_3377737_1;At_S0002_3377737_2;At_S0002_3377737_3;	-	-	-
At02	At_S0002	p3	TGATGATGATGATGATGATGA	3398505	GOBAR_AA22781	3397975	3402932	+	-	-	-	-	-	-	At_S0002_3398505_1;At_S0002_3398505_2;At_S0002_3398505_3;	-	-
At02	At_S0002	p3	TGGTGGTGGTGGTGGTGG	3443178	GOBAR_AA09894	3442226	3444313	+	GO:0004672|GO:0005524|GO:0006468|GO:0004672|GO:0006468|GO:0005524|GO:0007165|	protein kinase activity|ATP binding|protein phosphorylation|protein kinase activity|protein phosphorylation|ATP binding|signal transduction|	-	-	-	At_S0002_3443178_1;At_S0002_3443178_2;	-	At_S0002_3443178_3;	-
At02	At_S0002	p3	GGTGGTGGTGGTGGTGGT	3475592	GOBAR_AA09891	3475496	3479142	+	GO:0005515|GO:0005634|GO:0006355|	protein binding|nucleus|regulation of transcription, DNA-templated|	ko04075|	Plant hormone signal transduction |	-	-	At_S0002_3475592_1;At_S0002_3475592_2;At_S0002_3475592_3;	-	-
At02	At_S0002	p3	ATAATAATAATAATAATAATAATAATAATAATAATA	3492832	GOBAR_AA09888	3491921	3493207	-	GO:0003723|GO:0003735|GO:0005840|GO:0006412|GO:0003735|GO:0006412|GO:0015935|	RNA binding|structural constituent of ribosome|ribosome|translation|structural constituent of ribosome|translation|small ribosomal subunit|	ko03010|	Ribosome |	K02958	At_S0002_3492832_1;At_S0002_3492832_2;At_S0002_3492832_3;	-	-	-
At02	At_S0002	p4	TATGTATGTATGTATGTATGTATGTATGTATGTATGTATG	3494755	GOBAR_AA09887	3493958	3495371	+	GO:0003676|	nucleic acid binding|	-	-	-	-	At_S0002_3494755_1;At_S0002_3494755_2;At_S0002_3494755_3;	-	-
At02	At_S0002	p6	GTTAAGGTTAAGGTTAAG	3793415	GOBAR_AA31062	3792842	3793636	-	GO:0003676|GO:0046872|	nucleic acid binding|metal ion binding|	-	-	-	At_S0002_3793415_1;At_S0002_3793415_2;At_S0002_3793415_3;	-	-	-
At02	At_S0002	p1	CCCCCCCCCCCCCCCCCCCCCCCCCCCCCCC	4277079	GOBAR_AA36396	4273961	4277781	+	GO:0008168|	methyltransferase activity|	-	-	-	At_S0002_4277079_2;	At_S0002_4277079_1;At_S0002_4277079_3;	-	-
At02	At_S0002	p2	TCTCTCTCTCTCTCTCTCTCTCTCTCTCTCTC	4367339	GOBAR_AA27628	4366743	4368523	+	GO:0008080|	N-acetyltransferase activity|	-	-	-	-	At_S0002_4367339_1;At_S0002_4367339_2;At_S0002_4367339_3;	-	-
At02	At_S0002	p3	ACAACAACAACAACAACA	4380142	GOBAR_AA27626	4378983	4381526	-	GO:0004672|GO:0005524|GO:0006468|GO:0004672|GO:0006468|GO:0005524|	protein kinase activity|ATP binding|protein phosphorylation|protein kinase activity|protein phosphorylation|ATP binding|	-	-	-	-	At_S0002_4380142_1;At_S0002_4380142_2;At_S0002_4380142_3;	-	-
At02	At_S0002	p3	TTCTTCTTCTTCTTCTTCTTC	4435226	GOBAR_AA27622	4433932	4440830	+	GO:0004672|GO:0005524|GO:0006468|GO:0004672|GO:0006468|GO:0006355|	protein kinase activity|ATP binding|protein phosphorylation|protein kinase activity|protein phosphorylation|regulation of transcription, DNA-templated|	-	-	-	-	-	-	At_S0002_4435226_1;At_S0002_4435226_2;At_S0002_4435226_3;
At02	At_S0002	p6	AAAAAGAAAAAGAAAAAG	4443028	GOBAR_AA27621	4441458	4443239	-	-	-	-	-	-	-	-	At_S0002_4443028_1;At_S0002_4443028_2;At_S0002_4443028_3;	-
At02	At_S0002	p3	AATAATAATAATAATAAT	4664163	GOBAR_AA25385	4656061	4666110	-	GO:0016021|	integral component of membrane|	-	-	-	-	-	At_S0002_4664163_2;	At_S0002_4664163_1;At_S0002_4664163_3;
At02	At_S0002	p6	CCAGTTCCAGTTCCAGTT	4847464	GOBAR_AA26051	4847316	4847763	-	-	-	-	-	-	At_S0002_4847464_1;At_S0002_4847464_2;At_S0002_4847464_3;	-	-	-
At02	At_S0002	p2	ATATATATATATATATATATATATATATATATAT	4962939	GOBAR_AA28691	4961441	4975766	+	GO:0016491|GO:0055114|	oxidoreductase activity|oxidation-reduction process|	-	-	-	At_S0002_4962939_1;At_S0002_4962939_2;At_S0002_4962939_3;	-	-	-
At02	At_S0002	p6	CATTAACATTAACATTAA	4966990	GOBAR_AA28691	4961441	4975766	+	GO:0016491|GO:0055114|	oxidoreductase activity|oxidation-reduction process|	-	-	-	-	-	-	At_S0002_4966990_1;At_S0002_4966990_2;At_S0002_4966990_3;
At02	At_S0002	p2	TATATATATATATATATA	5123348	GOBAR_AA25844	5123004	5125720	-	GO:0005515|	protein binding|	-	-	-	At_S0002_5123348_1;At_S0002_5123348_2;At_S0002_5123348_3;	-	-	-
At02	At_S0002	p6	AAAAATAAAAATAAAAAT	5125382	GOBAR_AA25844	5123004	5125720	-	GO:0005515|	protein binding|	-	-	-	-	At_S0002_5125382_1;At_S0002_5125382_2;At_S0002_5125382_3;	-	-
At02	At_S0002	p2	ACACACACACACACACAC	5163245	GOBAR_AA25848	5161330	5163752	+	GO:0000166|GO:0003676|	nucleotide binding|nucleic acid binding|	-	-	-	-	At_S0002_5163245_1;At_S0002_5163245_2;At_S0002_5163245_3;	-	-
At02	At_S0002	p6	TTTTCTTTTTCTTTTTCT	5967468	GOBAR_AA22000	5964298	5971292	+	GO:0005515|GO:0008270|	protein binding|zinc ion binding|	-	-	-	-	At_S0002_5967468_1;At_S0002_5967468_2;	At_S0002_5967468_3;	-
At02	At_S0002	p6	TACATTTACATTTACATTTACATT	6219572	GOBAR_AA36234	6218398	6221587	-	GO:0006629|	lipid metabolic process|	-	-	-	-	At_S0002_6219572_1;At_S0002_6219572_2;At_S0002_6219572_3;	-	-
At02	At_S0002	p6	CAAGCTCAAGCTCAAGCT	6328260	GOBAR_AA33352	6328255	6328662	-	GO:0004672|GO:0005524|GO:0006468|GO:0004672|GO:0006468|	protein kinase activity|ATP binding|protein phosphorylation|protein kinase activity|protein phosphorylation|	-	-	-	-	At_S0002_6328260_1;At_S0002_6328260_2;At_S0002_6328260_3;	-	-
At02	At_S0002	p1	TTTTTTTTTTTTTTTTTT	6629280	GOBAR_AA39345	6628388	6630794	-	-	-	-	-	-	At_S0002_6629280_1;At_S0002_6629280_2;At_S0002_6629280_3;	-	-	-
At02	At_S0002	p6	AAAAAGAAAAAGAAAAAG	7206654	GOBAR_AA26264	7206026	7210862	-	GO:0051276|	chromosome organization|	-	-	K11490	At_S0002_7206654_1;At_S0002_7206654_2;At_S0002_7206654_3;	-	-	-
At02	At_S0002	p5	TGCAATGCAATGCAATGCAA	7403160	GOBAR_AA11819	7400189	7403714	+	GO:0005488|	binding|	-	-	-	-	At_S0002_7403160_1;At_S0002_7403160_2;At_S0002_7403160_3;	-	-
At02	At_S0002	p2	ATATATATATATATATAT	7948889	GOBAR_AA03700	7944849	7959860	+	-	-	-	-	-	-	At_S0002_7948889_1;At_S0002_7948889_2;At_S0002_7948889_3;	-	-
At02	At_S0002	p6	GAGAAAGAGAAAGAGAAA	7953751	GOBAR_AA03700	7944849	7959860	+	-	-	-	-	-	-	At_S0002_7953751_1;At_S0002_7953751_2;At_S0002_7953751_3;	-	-
At02	At_S0002	p3	ATGATGATGATGATGATG	8211200	GOBAR_AA12620	8210875	8215643	+	GO:0003677|GO:0005634|	DNA binding|nucleus|	-	-	-	-	At_S0002_8211200_1;At_S0002_8211200_2;At_S0002_8211200_3;	-	-
At02	At_S0002	p6	GCATTGGCATTGGCATTG	8599505	GOBAR_AA08186	8599202	8601828	+	GO:0001522|GO:0003723|GO:0009451|GO:0009982|	pseudouridine synthesis|RNA binding|RNA modification|pseudouridine synthase activity|	-	-	K06173	-	At_S0002_8599505_1;At_S0002_8599505_2;At_S0002_8599505_3;	-	-
At02	At_S0002	p6	TTTTTCTTTTTCTTTTTC	8804629	GOBAR_AA32443	8789353	8809438	+	-	-	-	-	-	At_S0002_8804629_1;At_S0002_8804629_2;At_S0002_8804629_3;	-	-	-
At02	At_S0002	p6	TTCTTTTTCTTTTTCTTT	8967610	GOBAR_AA12254	8967330	8974947	+	-	-	-	-	-	At_S0002_8967610_1;At_S0002_8967610_2;At_S0002_8967610_3;	-	-	-
At02	At_S0002	p3	GGCGGCGGCGGCGGCGGC	9833907	GOBAR_AA05292	9831139	9835060	-	GO:0003677|GO:0003700|GO:0006355|	DNA binding|transcription factor activity, sequence-specific DNA binding|regulation of transcription, DNA-templated|	-	-	-	-	At_S0002_9833907_1;At_S0002_9833907_2;At_S0002_9833907_3;	-	-
At02	At_S0002	p6	TATTTTTATTTTTATTTT	9927924	GOBAR_AA05287	9926126	9928866	+	-	-	-	-	-	-	At_S0002_9927924_1;At_S0002_9927924_2;At_S0002_9927924_3;	-	-
At02	At_S0002	p4	TTTATTTATTTATTTATTTA	10058233	GOBAR_AA21984	10056074	10062142	+	GO:0003700|GO:0006355|GO:0043565|	transcription factor activity, sequence-specific DNA binding|regulation of transcription, DNA-templated|sequence-specific DNA binding|	-	-	-	-	-	At_S0002_10058233_1;At_S0002_10058233_2;At_S0002_10058233_3;	-
At02	At_S0002	p6	CTTTGTCTTTGTCTTTGT	10141815	GOBAR_AA21989	10140479	10145921	+	GO:0004672|GO:0005524|GO:0006468|GO:0004672|GO:0006468|GO:0008152|GO:0016597|	protein kinase activity|ATP binding|protein phosphorylation|protein kinase activity|protein phosphorylation|metabolic process|amino acid binding|	-	-	-	-	At_S0002_10141815_1;At_S0002_10141815_2;At_S0002_10141815_3;	-	-
At02	At_S0002	p6	TTATTTTTATTTTTATTTTTATTT	10637428	GOBAR_AA09497	10636216	10641199	+	GO:0008270|GO:0016491|GO:0055114|GO:0055114|	zinc ion binding|oxidoreductase activity|oxidation-reduction process|oxidation-reduction process|	ko00010|ko00071|ko00592|ko00350|	Glycolysis / Gluconeogenesis |Fatty acid degradation |alpha-Linolenic acid metabolism |Tyrosine metabolism |	K00001	-	-	-	At_S0002_10637428_1;At_S0002_10637428_2;At_S0002_10637428_3;
At02	At_S0002	p3	TCTTCTTCTTCTTCTTCT	10662618	GOBAR_AA09500	10662361	10662945	-	-	-	-	-	-	-	At_S0002_10662618_1;At_S0002_10662618_2;At_S0002_10662618_3;	-	-
At02	At_S0002	p3	CCACCACCACCACCACCA	11160297	GOBAR_AA37013	11159832	11160803	+	GO:0005199|GO:0009664|	structural constituent of cell wall|plant-type cell wall organization|	-	-	-	-	-	-	At_S0002_11160297_1;At_S0002_11160297_2;At_S0002_11160297_3;
At02	At_S0002	p6	TTTTAATTTTAATTTTAA	11630683	GOBAR_AA10164	11625546	11632071	-	-	-	-	-	-	At_S0002_11630683_1;At_S0002_11630683_2;At_S0002_11630683_3;	-	-	-
At02	At_S0002	p5	AGGGGAGGGGAGGGGAGGGG	12135253	GOBAR_AA25808	12129273	12140789	+	GO:0005515|GO:0005634|GO:0018024|GO:0008270|	protein binding|nucleus|histone-lysine N-methyltransferase activity|zinc ion binding|	ko00310|	Lysine degradation |	-	-	At_S0002_12135253_1;At_S0002_12135253_2;At_S0002_12135253_3;	-	-
At02	At_S0002	p6	CATCAACATCAACATCAA	12356853	GOBAR_AA10996	12356248	12357544	-	GO:0016491|GO:0055114|	oxidoreductase activity|oxidation-reduction process|	ko00270|	Cysteine and methionine metabolism |	K05933	-	At_S0002_12356853_1;At_S0002_12356853_2;At_S0002_12356853_3;	-	-
At02	At_S0002	p5	AAATAAAATAAAATAAAATA	12628386	GOBAR_AA12188	12627942	12632106	-	GO:0004672|GO:0005524|GO:0006468|GO:0005515|GO:0005515|GO:0008270|	protein kinase activity|ATP binding|protein phosphorylation|protein binding|protein binding|zinc ion binding|	-	-	K03070	-	At_S0002_12628386_1;At_S0002_12628386_2;At_S0002_12628386_3;	-	-
At02	At_S0002	p5	TGTCATGTCATGTCATGTCA	12787148	GOBAR_AA12192	12785919	12791421	+	GO:0003677|GO:0005515|	DNA binding|protein binding|	-	-	K11649	At_S0002_12787148_1;At_S0002_12787148_2;At_S0002_12787148_3;	-	-	-
At02	At_S0002	p3	TTATTATTATTATTATTATTATTATTATTA	12911233	GOBAR_AA28290	12908406	12914230	-	GO:0004190|GO:0006508|	aspartic-type endopeptidase activity|proteolysis|	-	-	-	At_S0002_12911233_1;At_S0002_12911233_2;At_S0002_12911233_3;	-	-	-
At02	At_S0002	p2	ATATATATATATATATATAT	12976692	GOBAR_AA28289	12975852	12977516	-	GO:0045454|	cell redox homeostasis|	-	-	K09580	At_S0002_12976692_1;At_S0002_12976692_2;At_S0002_12976692_3;	-	-	-
At02	At_S0002	p6	ATTTTTATTTTTATTTTT	13018700	GOBAR_AA38909	13018139	13021596	+	GO:0004175|GO:0005839|GO:0051603|GO:0004298|GO:0004298|GO:0005839|GO:0051603|	endopeptidase activity|proteasome core complex|proteolysis involved in cellular protein catabolic process|threonine-type endopeptidase activity|threonine-type endopeptidase activity|proteasome core complex|proteolysis involved in cellular protein catabolic process|	ko03050|	Proteasome |	K02735	-	At_S0002_13018700_1;At_S0002_13018700_2;At_S0002_13018700_3;	-	-
At02	At_S0002	p6	CACATTCACATTCACATT	13020541	GOBAR_AA38909	13018139	13021596	+	GO:0004175|GO:0005839|GO:0051603|GO:0004298|GO:0004298|GO:0005839|GO:0051603|	endopeptidase activity|proteasome core complex|proteolysis involved in cellular protein catabolic process|threonine-type endopeptidase activity|threonine-type endopeptidase activity|proteasome core complex|proteolysis involved in cellular protein catabolic process|	ko03050|	Proteasome |	K02735	-	At_S0002_13020541_1;At_S0002_13020541_2;At_S0002_13020541_3;	-	-
At02	At_S0002	p5	TTATTTTATTTTATTTTATT	13254235	GOBAR_AA26848	13253068	13254573	-	-	-	-	-	-	-	-	-	At_S0002_13254235_1;At_S0002_13254235_2;At_S0002_13254235_3;
At02	At_S0002	p3	TTATTATTATTATTATTA	13788858	GOBAR_AA22413	13787688	13789928	+	-	-	-	-	-	At_S0002_13788858_1;At_S0002_13788858_2;At_S0002_13788858_3;	-	-	-
At02	At_S0002	p3	AGAAGAAGAAGAAGAAGA	13886894	GOBAR_AA07445	13879312	13887961	-	GO:0004672|GO:0005524|GO:0006468|GO:0004672|GO:0006468|GO:0005524|	protein kinase activity|ATP binding|protein phosphorylation|protein kinase activity|protein phosphorylation|ATP binding|	ko04626|	Plant-pathogen interaction |	K13414	-	At_S0002_13886894_1;At_S0002_13886894_2;At_S0002_13886894_3;	-	-
At02	At_S0002	p2	ATATATATATATATATAT	13887824	GOBAR_AA07445	13879312	13887961	-	GO:0004672|GO:0005524|GO:0006468|GO:0004672|GO:0006468|GO:0005524|	protein kinase activity|ATP binding|protein phosphorylation|protein kinase activity|protein phosphorylation|ATP binding|	ko04626|	Plant-pathogen interaction |	K13414	At_S0002_13887824_1;At_S0002_13887824_2;At_S0002_13887824_3;	-	-	-
At02	At_S0002	p2	TATATATATATATATATA	14091499	GOBAR_AA07449	14090783	14093313	-	-	-	-	-	-	-	At_S0002_14091499_1;At_S0002_14091499_2;At_S0002_14091499_3;	-	-
At02	At_S0002	p2	ATATATATATATATATATAT	14590058	GOBAR_AA14162	14589208	14592229	-	GO:0003677|GO:0046983|GO:0003700|GO:0005634|GO:0006355|	DNA binding|protein dimerization activity|transcription factor activity, sequence-specific DNA binding|nucleus|regulation of transcription, DNA-templated|	-	-	-	At_S0002_14590058_1;At_S0002_14590058_2;At_S0002_14590058_3;	-	-	-
At02	At_S0002	p6	ATATGTATATGTATATGTATATGT	14939867	GOBAR_AA13410	14939131	14940756	-	GO:0004672|GO:0005524|GO:0006468|GO:0004672|GO:0006468|	protein kinase activity|ATP binding|protein phosphorylation|protein kinase activity|protein phosphorylation|	-	-	K14498	At_S0002_14939867_1;At_S0002_14939867_2;At_S0002_14939867_3;	-	-	-
At02	At_S0002	p3	TCCTCCTCCTCCTCCTCC	15097006	GOBAR_AA11187	15096321	15097781	+	GO:0003676|	nucleic acid binding|	-	-	-	-	-	At_S0002_15097006_2;At_S0002_15097006_3;	At_S0002_15097006_1;
At02	At_S0002	p6	TTCACTTTCACTTTCACTTTCACTTTCACT	16289198	GOBAR_AA32518	16287403	16291717	-	GO:0007165|	signal transduction|	-	-	-	At_S0002_16289198_1;At_S0002_16289198_2;At_S0002_16289198_3;	-	-	-
At02	At_S0002	p2	TCTCTCTCTCTCTCTCTC	17468386	GOBAR_AA25029	17441231	17470942	+	GO:0005488|GO:0005515|	binding|protein binding|	-	-	-	-	-	-	At_S0002_17468386_1;At_S0002_17468386_2;At_S0002_17468386_3;
At02	At_S0002	p5	CTTCTCTTCTCTTCTCTTCT	17487613	GOBAR_AA25031	17485959	17492326	+	GO:0003824|GO:0004372|GO:0006544|GO:0006563|GO:0030170|GO:0016740|	catalytic activity|glycine hydroxymethyltransferase activity|glycine metabolic process|L-serine metabolic process|pyridoxal phosphate binding|transferase activity|	ko01200|ko01230|ko00630|ko00680|ko00260|ko00460|ko00670|	Carbon metabolism |Biosynthesis of amino acids |Glyoxylate and dicarboxylate metabolism |Methane metabolism |Glycine, serine and threonine metabolism |Cyanoamino acid metabolism |One carbon pool by folate |	K00600	-	At_S0002_17487613_1;At_S0002_17487613_2;At_S0002_17487613_3;	-	-
At02	At_S0002	p5	CTTCTCTTCTCTTCTCTTCT	17489143	GOBAR_AA25031	17485959	17492326	+	GO:0003824|GO:0004372|GO:0006544|GO:0006563|GO:0030170|GO:0016740|	catalytic activity|glycine hydroxymethyltransferase activity|glycine metabolic process|L-serine metabolic process|pyridoxal phosphate binding|transferase activity|	ko01200|ko01230|ko00630|ko00680|ko00260|ko00460|ko00670|	Carbon metabolism |Biosynthesis of amino acids |Glyoxylate and dicarboxylate metabolism |Methane metabolism |Glycine, serine and threonine metabolism |Cyanoamino acid metabolism |One carbon pool by folate |	K00600	-	At_S0002_17489143_1;At_S0002_17489143_2;At_S0002_17489143_3;	-	-
At02	At_S0002	p2	TCTCTCTCTCTCTCTCTCTCTCTCTCTC	17490044	GOBAR_AA25031	17485959	17492326	+	GO:0003824|GO:0004372|GO:0006544|GO:0006563|GO:0030170|GO:0016740|	catalytic activity|glycine hydroxymethyltransferase activity|glycine metabolic process|L-serine metabolic process|pyridoxal phosphate binding|transferase activity|	ko01200|ko01230|ko00630|ko00680|ko00260|ko00460|ko00670|	Carbon metabolism |Biosynthesis of amino acids |Glyoxylate and dicarboxylate metabolism |Methane metabolism |Glycine, serine and threonine metabolism |Cyanoamino acid metabolism |One carbon pool by folate |	K00600	At_S0002_17490044_1;At_S0002_17490044_2;At_S0002_17490044_3;	-	-	-
At02	At_S0002	p2	TCTCTCTCTCTCTCTCTCTCTCTCTCTCTC	17490939	GOBAR_AA25031	17485959	17492326	+	GO:0003824|GO:0004372|GO:0006544|GO:0006563|GO:0030170|GO:0016740|	catalytic activity|glycine hydroxymethyltransferase activity|glycine metabolic process|L-serine metabolic process|pyridoxal phosphate binding|transferase activity|	ko01200|ko01230|ko00630|ko00680|ko00260|ko00460|ko00670|	Carbon metabolism |Biosynthesis of amino acids |Glyoxylate and dicarboxylate metabolism |Methane metabolism |Glycine, serine and threonine metabolism |Cyanoamino acid metabolism |One carbon pool by folate |	K00600	At_S0002_17490939_1;At_S0002_17490939_3;	At_S0002_17490939_2;	-	-
At02	At_S0002	p3	AATAATAATAATAATAATAATAAT	19651664	GOBAR_AA05465	19649114	19653393	+	GO:0003824|GO:0008152|GO:0004084|GO:0009081|	catalytic activity|metabolic process|branched-chain-amino-acid transaminase activity|branched-chain amino acid metabolic process|	ko01210|ko01230|ko00270|ko00280|ko00290|ko00770|	2-Oxocarboxylic acid metabolism |Biosynthesis of amino acids |Cysteine and methionine metabolism |Valine, leucine and isoleucine degradation |Valine, leucine and isoleucine biosynthesis |Pantothenate and CoA biosynthesis |	K00826	At_S0002_19651664_2;At_S0002_19651664_3;	At_S0002_19651664_1;	-	-
At02	At_S0002	p6	ATTATCATTATCATTATC	21155628	GOBAR_AA12326	21154413	21155753	-	GO:0005634|	nucleus|	ko04075|	Plant hormone signal transduction |	K14505	-	At_S0002_21155628_1;At_S0002_21155628_2;At_S0002_21155628_3;	-	-
At02	At_S0002	p2	GAGAGAGAGAGAGAGAGAGAGAGA	23160456	GOBAR_AA01219	23157092	23162812	-	GO:0016757|GO:0047262|	transferase activity, transferring glycosyl groups|polygalacturonate 4-alpha-galacturonosyltransferase activity|	ko00500|ko00520|	Starch and sucrose metabolism |Amino sugar and nucleotide sugar metabolism |	K13648	At_S0002_23160456_1;At_S0002_23160456_2;At_S0002_23160456_3;	-	-	-
At02	At_S0002	p6	CTGCACCTGCACCTGCAC	23390412	GOBAR_AA01222	23388614	23398089	+	GO:0004672|GO:0005524|GO:0006468|GO:0004672|GO:0006468|GO:0005515|GO:0005524|	protein kinase activity|ATP binding|protein phosphorylation|protein kinase activity|protein phosphorylation|protein binding|ATP binding|	-	-	-	-	At_S0002_23390412_1;At_S0002_23390412_2;At_S0002_23390412_3;	-	-
At02	At_S0002	p2	ACACACACACACACACACAC	24596874	GOBAR_AA08851	24591494	24606798	+	GO:0004571|GO:0005509|GO:0016020|	mannosyl-oligosaccharide 1,2-alpha-mannosidase activity|calcium ion binding|membrane|	ko00510|ko00513|ko04141|	N-Glycan biosynthesis |Various types of N-glycan biosynthesis |Protein processing in endoplasmic reticulum |	K01230	-	At_S0002_24596874_1;At_S0002_24596874_2;At_S0002_24596874_3;	-	-
At02	At_S0002	p1	TTTTTTTTTTTTTTTTTTTTTTTTT	24749688	GOBAR_AA08852	24744159	24750475	+	GO:0010181|GO:0016491|GO:0055114|	FMN binding|oxidoreductase activity|oxidation-reduction process|	-	-	-	-	-	-	-
At02	At_S0002	p6	ACAATTACAATTACAATT	27076288	GOBAR_AA08499	27069426	27077714	-	GO:0005198|GO:0006890|GO:0005515|	structural molecule activity|retrograde vesicle-mediated transport, Golgi to ER|protein binding|	-	-	-	-	At_S0002_27076288_1;At_S0002_27076288_2;At_S0002_27076288_3;	-	-
At02	At_S0002	p3	CCTCCTCCTCCTCCTCCTCCT	28019768	GOBAR_AA03540	28019257	28019905	-	-	-	-	-	-	-	At_S0002_28019768_1;At_S0002_28019768_2;At_S0002_28019768_3;	-	-
At02	At_S0002	p2	GTGTGTGTGTGTGTGTGTGTGTGTGTGT	28891940	GOBAR_AA32614	28888114	28892137	+	GO:0046872|	metal ion binding|	-	-	-	At_S0002_28891940_1;At_S0002_28891940_2;At_S0002_28891940_3;	-	-	-
At02	At_S0002	p6	TATTCCTATTCCTATTCCTATTCC	28962712	GOBAR_AA28648	28961132	28964067	-	GO:0003824|GO:0008152|	catalytic activity|metabolic process|	ko00592|	alpha-Linolenic acid metabolism |	K10526	At_S0002_28962712_1;At_S0002_28962712_2;At_S0002_28962712_3;	-	-	-
At02	At_S0002	p6	GGATGAGGATGAGGATGA	29510028	GOBAR_AA05039	29505869	29510160	+	-	-	-	-	-	-	At_S0002_29510028_1;At_S0002_29510028_2;At_S0002_29510028_3;	-	-
At02	At_S0002	p6	GAAACAGAAACAGAAACA	29929088	GOBAR_AA29467	29925435	29931990	-	GO:0006396|	RNA processing|	ko03040|ko04139|ko05322|	Spliceosome |Regulation of mitophagy - yeast |Systemic lupus erythematosus |	K11088	-	-	-	At_S0002_29929088_1;At_S0002_29929088_2;At_S0002_29929088_3;
At02	At_S0002	p2	CTCTCTCTCTCTCTCTCTCTCTCTCTCTCTCTCTCTCTCTCT	30654017	GOBAR_AA05843	30653186	30656207	+	-	-	-	-	-	At_S0002_30654017_1;At_S0002_30654017_2;At_S0002_30654017_3;	-	-	-
At02	At_S0002	p3	TGATGATGATGATGATGA	30940102	GOBAR_AA05847	30939896	30944919	+	GO:0005515|	protein binding|	-	-	-	At_S0002_30940102_2;	-	At_S0002_30940102_1;At_S0002_30940102_3;	-
At02	At_S0002	p6	ATATTTATATTTATATTT	32180603	GOBAR_AA02544	32179447	32185012	+	GO:0005215|GO:0006810|GO:0016020|GO:0005215|GO:0006857|GO:0016020|	transporter activity|transport|membrane|transporter activity|oligopeptide transport|membrane|	-	-	-	-	At_S0002_32180603_1;At_S0002_32180603_2;At_S0002_32180603_3;	-	-
At02	At_S0002	p5	TTTTCTTTTCTTTTCTTTTC	32585606	GOBAR_AA28373	32582471	32592973	-	GO:0003677|GO:0003899|GO:0006351|	DNA binding|DNA-directed RNA polymerase activity|transcription, DNA-templated|	-	-	K03046	At_S0002_32585606_1;At_S0002_32585606_2;At_S0002_32585606_3;	-	-	-
At02	At_S0002	p6	ATTTTAATTTTAATTTTA	32585748	GOBAR_AA28373	32582471	32592973	-	GO:0003677|GO:0003899|GO:0006351|	DNA binding|DNA-directed RNA polymerase activity|transcription, DNA-templated|	-	-	K03046	At_S0002_32585748_1;At_S0002_32585748_2;At_S0002_32585748_3;	-	-	-
At02	At_S0002	p3	TAATAATAATAATAATAATAATAA	33232121	GOBAR_AA02764	33230593	33234331	-	-	-	-	-	-	-	At_S0002_33232121_1;At_S0002_33232121_2;At_S0002_33232121_3;	-	-
At02	At_S0002	p6	AAAAAGAAAAAGAAAAAG	36357165	GOBAR_AA15748	36355428	36358574	+	GO:0004252|GO:0016021|	serine-type endopeptidase activity|integral component of membrane|	-	-	-	At_S0002_36357165_1;At_S0002_36357165_2;	At_S0002_36357165_3;	-	-
At02	At_S0002	p2	GAGAGAGAGAGAGAGAGAGA	38725415	GOBAR_AA25621	38724667	38725813	-	GO:0003735|GO:0005622|GO:0005840|GO:0006412|GO:0003735|GO:0005840|GO:0006412|GO:0019843|	structural constituent of ribosome|intracellular|ribosome|translation|structural constituent of ribosome|ribosome|translation|rRNA binding|	ko03010|	Ribosome |	K02940	-	At_S0002_38725415_1;At_S0002_38725415_2;At_S0002_38725415_3;	-	-
At02	At_S0002	p6	TTTTATTTTTATTTTTAT	39692294	GOBAR_AA16837	39691563	39694563	+	GO:0016021|	integral component of membrane|	-	-	K15382	At_S0002_39692294_1;At_S0002_39692294_2;At_S0002_39692294_3;	-	-	-
At02	At_S0002	p3	AAGAAGAAGAAGAAGAAGAAG	41794389	GOBAR_AA12497	41794193	41795975	+	GO:0003677|GO:0003677|GO:0003713|GO:0006355|GO:0003677|GO:0006355|	DNA binding|DNA binding|transcription coactivator activity|regulation of transcription, DNA-templated|DNA binding|regulation of transcription, DNA-templated|	-	-	-	-	-	At_S0002_41794389_1;At_S0002_41794389_2;At_S0002_41794389_3;	-
At02	At_S0002	p5	TTTCTTTTCTTTTCTTTTCTTTTCT	43112334	GOBAR_AA01049	43110833	43113769	-	GO:0003824|GO:0004553|GO:0005975|GO:0030246|	catalytic activity|hydrolase activity, hydrolyzing O-glycosyl compounds|carbohydrate metabolic process|carbohydrate binding|	-	-	-	-	At_S0002_43112334_1;At_S0002_43112334_2;At_S0002_43112334_3;	-	-
At02	At_S0002	p6	TCTGATTCTGATTCTGAT	43268150	GOBAR_AA01055	43265558	43268259	-	-	-	-	-	-	-	At_S0002_43268150_1;At_S0002_43268150_2;At_S0002_43268150_3;	-	-
At02	At_S0002	p6	TTTCCTTTTCCTTTTCCT	43310320	GOBAR_AA01059	43308873	43312864	-	-	-	-	-	-	-	At_S0002_43310320_1;At_S0002_43310320_2;	At_S0002_43310320_3;	-
At02	At_S0002	p6	TTTCCTTTTCCTTTTCCT	43312010	GOBAR_AA01059	43308873	43312864	-	-	-	-	-	-	-	At_S0002_43312010_1;At_S0002_43312010_2;	At_S0002_43312010_3;	-
At02	At_S0002	p5	TATTTTATTTTATTTTATTT	43412789	GOBAR_AA01063	43409650	43419461	+	-	-	-	-	-	At_S0002_43412789_1;At_S0002_43412789_2;At_S0002_43412789_3;	-	-	-
At02	At_S0002	p2	AGAGAGAGAGAGAGAGAG	49174412	GOBAR_AA22449	49173828	49178236	-	GO:0005524|GO:0016308|GO:0016307|GO:0046488|	ATP binding|1-phosphatidylinositol-4-phosphate 5-kinase activity|phosphatidylinositol phosphate kinase activity|phosphatidylinositol metabolic process|	ko00562|ko04011|ko04070|ko04072|ko04144|ko04139|ko04810|ko04666|ko05231|	Inositol phosphate metabolism |MAPK signaling pathway - yeast |Phosphatidylinositol signaling system |Phospholipase D signaling pathway |Endocytosis |Regulation of mitophagy - yeast |Regulation of actin cytoskeleton |Fc gamma R-mediated phagocytosis |Choline metabolism in cancer |	K00889	At_S0002_49174412_1;At_S0002_49174412_2;At_S0002_49174412_3;	-	-	-
At02	At_S0002	p6	CTTTTGCTTTTGCTTTTG	55052188	GOBAR_AA09519	55051879	55053002	+	-	-	-	-	-	-	-	-	At_S0002_55052188_1;At_S0002_55052188_2;At_S0002_55052188_3;
At02	At_S0002	p6	TTTTTATTTTTATTTTTA	55260377	GOBAR_AA09518	55259404	55260592	+	-	-	-	-	-	-	-	-	At_S0002_55260377_1;At_S0002_55260377_2;At_S0002_55260377_3;
At02	At_S0002	p4	ACAAACAAACAAACAAACAA	57143115	GOBAR_AA32995	57141645	57144499	-	GO:0016787|	hydrolase activity|	ko03015|ko04390|ko04024|ko04022|ko04810|ko04113|ko04114|ko04510|ko04611|ko04910|ko04921|ko04261|ko04270|ko04728|ko04720|ko04750|ko05205|ko05031|ko05034|ko04931|ko05168|	mRNA surveillance pathway |Hippo signaling pathway |cAMP signaling pathway |cGMP - PKG signaling pathway |Regulation of actin cytoskeleton |Meiosis - yeast |Oocyte meiosis |Focal adhesion |Platelet activation |Insulin signaling pathway |Oxytocin signaling pathway |Adrenergic signaling in cardiomyocytes |Vascular smooth muscle contraction |Dopaminergic synapse |Long-term potentiation |Inflammatory…	K06269	At_S0002_57143115_1;At_S0002_57143115_2;At_S0002_57143115_3;	-	-	-
At02	At_S0002	p2	CTCTCTCTCTCTCTCTCTCTCTCTCTCTCTCTCTCTCTCT	57252081	GOBAR_AA19145	57251637	57255564	+	GO:0003676|	nucleic acid binding|	-	-	K11135	-	At_S0002_57252081_1;At_S0002_57252081_2;At_S0002_57252081_3;	-	-
At02	At_S0002	p6	CTCTTCCTCTTCCTCTTC	59006713	GOBAR_AA12708	59005993	59008570	-	GO:0003700|GO:0005634|GO:0006355|GO:0043565|	transcription factor activity, sequence-specific DNA binding|nucleus|regulation of transcription, DNA-templated|sequence-specific DNA binding|	-	-	-	-	At_S0002_59006713_1;At_S0002_59006713_2;At_S0002_59006713_3;	-	-
At02	At_S0002	p3	ATTATTATTATTATTATT	60241333	GOBAR_AA17559	60240805	60249153	+	GO:0000166|GO:0003676|	nucleotide binding|nucleic acid binding|	-	-	K13093	At_S0002_60241333_1;At_S0002_60241333_2;	At_S0002_60241333_3;	-	-
At02	At_S0002	p6	AGGGTGAGGGTGAGGGTG	61032304	GOBAR_AA16414	61031395	61032861	+	-	-	-	-	-	-	At_S0002_61032304_1;	-	At_S0002_61032304_2;At_S0002_61032304_3;
At02	At_S0002	p6	TAAAAATAAAAATAAAAA	62383166	GOBAR_AA23926	62379598	62384410	-	GO:0005515|	protein binding|	-	-	-	-	-	-	-
At02	At_S0002	p2	TATATATATATATATATATA	63313221	GOBAR_AA29958	63310403	63318314	+	GO:0005509|GO:0005509|GO:0005515|GO:0005509|GO:0005783|GO:0006457|GO:0051082|	calcium ion binding|calcium ion binding|protein binding|calcium ion binding|endoplasmic reticulum|protein folding|unfolded protein binding|	ko04141|ko04145|ko04612|ko05166|ko05142|	Protein processing in endoplasmic reticulum |Phagosome |Antigen processing and presentation |HTLV-I infection |Chagas disease (American trypanosomiasis) |	K08057	-	At_S0002_63313221_1;At_S0002_63313221_2;At_S0002_63313221_3;	-	-
At02	At_S0002	p3	TTATTATTATTATTATTATTA	68478314	GOBAR_AA22462	68472649	68479340	+	-	-	-	-	-	-	-	-	At_S0002_68478314_1;At_S0002_68478314_2;At_S0002_68478314_3;
At02	At_S0002	p3	TTATTATTATTATTATTATTA	68478939	GOBAR_AA22462	68472649	68479340	+	-	-	-	-	-	-	-	-	At_S0002_68478939_1;At_S0002_68478939_2;At_S0002_68478939_3;
At02	At_S0002	p2	TCTCTCTCTCTCTCTCTCTCTCTCTC	69060974	GOBAR_AA17635	69054301	69062486	+	-	-	-	-	K10728	-	At_S0002_69060974_1;At_S0002_69060974_2;At_S0002_69060974_3;	-	-
At02	At_S0002	p6	TAAAAATAAAAATAAAAATAAAAA	69556291	GOBAR_AA28439	69547291	69557349	-	-	-	-	-	-	-	-	-	At_S0002_69556291_1;At_S0002_69556291_2;At_S0002_69556291_3;
At02	At_S0002	p6	TTATTTTTATTTTTATTT	72188680	GOBAR_AA22682	72187477	72189052	+	-	-	-	-	-	-	-	-	At_S0002_72188680_1;At_S0002_72188680_2;At_S0002_72188680_3;
At02	At_S0002	p3	TCATCATCATCATCATCA	72724092	GOBAR_AA05076	72723102	72724892	+	-	-	-	-	-	-	At_S0002_72724092_1;At_S0002_72724092_2;At_S0002_72724092_3;	-	-
At02	At_S0002	p5	TCGCATCGCATCGCATCGCA	73016156	GOBAR_AA05081	73016144	73017816	+	GO:0005525|	GTP binding|	-	-	-	-	-	At_S0002_73016156_1;At_S0002_73016156_2;At_S0002_73016156_3;	-
At02	At_S0002	p6	TAAATATAAATATAAATA	73893621	GOBAR_AA20559	73892099	73895728	-	-	-	-	-	K01079	-	-	-	At_S0002_73893621_1;At_S0002_73893621_2;At_S0002_73893621_3;
At02	At_S0002	p6	TAAAAATAAAAATAAAAA	74007798	GOBAR_AA20564	74005676	74010396	-	GO:0003824|GO:0008152|	catalytic activity|metabolic process|	-	-	-	-	-	-	At_S0002_74007798_1;At_S0002_74007798_2;At_S0002_74007798_3;
At02	At_S0002	p6	TAAAAATAAAAATAAAAA	74009134	GOBAR_AA20564	74005676	74010396	-	GO:0003824|GO:0008152|	catalytic activity|metabolic process|	-	-	-	-	-	-	At_S0002_74009134_1;At_S0002_74009134_2;At_S0002_74009134_3;
At02	At_S0002	p6	TAAAAATAAAAATAAAAA	74010321	GOBAR_AA20564	74005676	74010396	-	GO:0003824|GO:0008152|	catalytic activity|metabolic process|	-	-	-	-	-	-	At_S0002_74010321_1;At_S0002_74010321_2;At_S0002_74010321_3;
At02	At_S0002	p6	TATTTTTATTTTTATTTT	75993264	GOBAR_AA03482	75990439	75996524	-	GO:0003779|	actin binding|	ko04015|ko04810|ko05132|ko05131|	Rap1 signaling pathway |Regulation of actin cytoskeleton |Salmonella infection |Shigellosis |	K05759	-	-	-	-
At02	At_S0002	p6	TATTTTTATTTTTATTTT	75993583	GOBAR_AA03482	75990439	75996524	-	GO:0003779|	actin binding|	ko04015|ko04810|ko05132|ko05131|	Rap1 signaling pathway |Regulation of actin cytoskeleton |Salmonella infection |Shigellosis |	K05759	-	-	-	-
At02	At_S0002	p1	AAAAAAAAAAAAAAAAAAAAAAA	75993843	GOBAR_AA03482	75990439	75996524	-	GO:0003779|	actin binding|	ko04015|ko04810|ko05132|ko05131|	Rap1 signaling pathway |Regulation of actin cytoskeleton |Salmonella infection |Shigellosis |	K05759	-	At_S0002_75993843_1;At_S0002_75993843_2;At_S0002_75993843_3;	-	-
At02	At_S0002	p2	TATATATATATATATATA	76065457	GOBAR_AA03484	76064122	76069948	+	GO:0003872|GO:0006002|GO:0006096|GO:0003872|GO:0006096|	6-phosphofructokinase activity|fructose 6-phosphate metabolic process|glycolytic process|6-phosphofructokinase activity|glycolytic process|	ko01200|ko01230|ko00010|ko00030|ko00051|ko00052|ko00680|ko03018|ko04152|ko05230|	Carbon metabolism |Biosynthesis of amino acids |Glycolysis / Gluconeogenesis |Pentose phosphate pathway |Fructose and mannose metabolism |Galactose metabolism |Methane metabolism |RNA degradation |AMPK signaling pathway |Central carbon metabolism in cancer |	K00850	At_S0002_76065457_1;At_S0002_76065457_2;At_S0002_76065457_3;	-	-	-
At02	At_S0002	p1	AAAAAAAAAAAAAAAAAAAA	77277759	GOBAR_AA01703	77277154	77277914	-	GO:0005515|	protein binding|	-	-	-	-	At_S0002_77277759_1;At_S0002_77277759_2;At_S0002_77277759_3;	-	-
At02	At_S0002	p2	TCTCTCTCTCTCTCTCTCTCTCTCTCTC	77637545	GOBAR_AA01709	77632346	77641725	-	GO:0004470|GO:0004471|GO:0006108|GO:0055114|GO:0004471|GO:0051287|GO:0055114|GO:0004471|GO:0055114|	malic enzyme activity|malate dehydrogenase (decarboxylating) (NAD+) activity|malate metabolic process|oxidation-reduction process|malate dehydrogenase (decarboxylating) (NAD+) activity|NAD binding|oxidation-reduction process|malate dehydrogenase (decarboxylating) (NAD+) activity|oxidation-reduction process|	ko01200|ko00620|ko00710|	Carbon metabolism |Pyruvate metabolism |Carbon fixation in photosynthetic organisms |	K00029	At_S0002_77637545_1;At_S0002_77637545_2;At_S0002_77637545_3;	-	-	-
At02	At_S0002	p2	ATATATATATATATATAT	79125777	GOBAR_AA35957	79110151	79133385	+	GO:0003676|GO:0003723|	nucleic acid binding|RNA binding|	-	-	-	-	-	-	-
At02	At_S0002	p4	ATTTATTTATTTATTTATTT	79132825	GOBAR_AA35957	79110151	79133385	+	GO:0003676|GO:0003723|	nucleic acid binding|RNA binding|	-	-	-	-	At_S0002_79132825_1;At_S0002_79132825_2;	At_S0002_79132825_3;	-
At02	At_S0002	p3	CATCATCATCATCATCATCAT	79429832	GOBAR_AA34316	79429593	79435977	-	-	-	-	-	K15216	-	At_S0002_79429832_1;At_S0002_79429832_2;At_S0002_79429832_3;	-	-
At02	At_S0002	p3	AATAATAATAATAATAATAATAAT	79635533	GOBAR_AA12915	79626085	79639688	+	GO:0005524|GO:0016887|GO:0016020|	ATP binding|ATPase activity|membrane|	-	-	-	-	-	-	At_S0002_79635533_1;At_S0002_79635533_2;At_S0002_79635533_3;
At02	At_S0002	p3	AATAATAATAATAATAATAATAAT	79637187	GOBAR_AA12915	79626085	79639688	+	GO:0005524|GO:0016887|GO:0016020|	ATP binding|ATPase activity|membrane|	-	-	-	-	-	-	At_S0002_79637187_1;At_S0002_79637187_2;At_S0002_79637187_3;
At02	At_S0002	p6	GTATATGTATATGTATAT	79639372	GOBAR_AA12915	79626085	79639688	+	GO:0005524|GO:0016887|GO:0016020|	ATP binding|ATPase activity|membrane|	-	-	-	-	At_S0002_79639372_1;At_S0002_79639372_2;At_S0002_79639372_3;	-	-
At02	At_S0002	p2	TCTCTCTCTCTCTCTCTC	79906065	GOBAR_AA23227	79898738	79908411	+	GO:0035091|	phosphatidylinositol binding|	-	-	-	At_S0002_79906065_1;At_S0002_79906065_2;At_S0002_79906065_3;	-	-	-
At02	At_S0002	p3	GGAGGAGGAGGAGGAGGA	80164904	GOBAR_AA15593	80164407	80168962	+	-	-	-	-	-	-	At_S0002_80164904_1;At_S0002_80164904_2;At_S0002_80164904_3;	-	-
At02	At_S0002	p3	TATTATTATTATTATTATTATTATTAT	80166505	GOBAR_AA15593	80164407	80168962	+	-	-	-	-	-	-	At_S0002_80166505_1;At_S0002_80166505_2;At_S0002_80166505_3;	-	-
At02	At_S0002	p3	ATGATGATGATGATGATGATG	80265947	GOBAR_AA15596	80265721	80266566	+	-	-	-	-	-	-	At_S0002_80265947_1;At_S0002_80265947_2;At_S0002_80265947_3;	-	-
At02	At_S0002	p6	TTTTTGTTTTTGTTTTTG	80497473	GOBAR_AA14955	80497172	80501954	+	GO:0005198|GO:0006886|GO:0016192|GO:0030117|GO:0005515|	structural molecule activity|intracellular protein transport|vesicle-mediated transport|membrane coat|protein binding|	-	-	-	-	At_S0002_80497473_1;At_S0002_80497473_2;At_S0002_80497473_3;	-	-
At02	At_S0002	p2	TGTGTGTGTGTGTGTGTGTG	80602798	GOBAR_AA09476	80598755	80604888	+	-	-	-	-	-	-	-	-	At_S0002_80602798_1;At_S0002_80602798_2;At_S0002_80602798_3;
At02	At_S0002	p2	TGTGTGTGTGTGTGTGTGTG	80603507	GOBAR_AA09476	80598755	80604888	+	-	-	-	-	-	-	-	-	At_S0002_80603507_1;At_S0002_80603507_2;At_S0002_80603507_3;
At02	At_S0002	p1	AAAAAAAAAAAAAAAAAA	80766482	GOBAR_AA09483	80763271	80767226	+	-	-	ko03410|	Base excision repair |	K10803	At_S0002_80766482_1;At_S0002_80766482_2;At_S0002_80766482_3;	-	-	-
At02	At_S0002	p2	TCTCTCTCTCTCTCTCTC	80892359	GOBAR_AA13594	80881567	80900639	+	GO:0005515|	protein binding|	-	-	K00670	At_S0002_80892359_1;At_S0002_80892359_2;At_S0002_80892359_3;	-	-	-
At02	At_S0002	p1	AAAAAAAAAAAAAAAAAAA	81237794	GOBAR_AA07692	81235618	81240214	-	-	-	ko01200|ko00630|ko00561|ko00260|	Carbon metabolism |Glyoxylate and dicarboxylate metabolism |Glycerolipid metabolism |Glycine, serine and threonine metabolism |	-	-	At_S0002_81237794_1;At_S0002_81237794_2;At_S0002_81237794_3;	-	-
At02	At_S0002	p4	CTCCCTCCCTCCCTCCCTCCCTCCCTCC	81277621	GOBAR_AA07693	81274974	81280304	+	GO:0005524|GO:0008017|GO:0008568|GO:0051013|	ATP binding|microtubule binding|microtubule-severing ATPase activity|microtubule severing|	-	-	K07767	-	-	At_S0002_81277621_1;At_S0002_81277621_2;At_S0002_81277621_3;	-
At02	At_S0002	p4	CTCCCTCCCTCCCTCCCTCCCTCCCTCC	81278944	GOBAR_AA07693	81274974	81280304	+	GO:0005524|GO:0008017|GO:0008568|GO:0051013|	ATP binding|microtubule binding|microtubule-severing ATPase activity|microtubule severing|	-	-	K07767	-	-	At_S0002_81278944_1;At_S0002_81278944_2;At_S0002_81278944_3;	-
At02	At_S0002	p5	AATTAAATTAAATTAAATTA	81328258	GOBAR_AA07696	81323641	81328528	-	-	-	-	-	-	At_S0002_81328258_1;At_S0002_81328258_2;At_S0002_81328258_3;	-	-	-
At02	At_S0002	p6	TTTTTATTTTTATTTTTA	81493293	GOBAR_AA07698	81492702	81498309	+	GO:0004650|GO:0005975|GO:0005215|GO:0006810|GO:0016020|GO:0055085|	polygalacturonase activity|carbohydrate metabolic process|transporter activity|transport|membrane|transmembrane transport|	-	-	K14611	-	-	-	At_S0002_81493293_1;At_S0002_81493293_2;At_S0002_81493293_3;
At02	At_S0002	p1	AAAAAAAAAAAAAAAAAAAAAAAAAAAA	85053642	GOBAR_AA02761	85051655	85056426	+	GO:0005524|GO:0005634|GO:0006355|GO:0005634|GO:0006351|GO:0032502|	ATP binding|nucleus|regulation of transcription, DNA-templated|nucleus|transcription, DNA-templated|developmental process|	-	-	-	-	At_S0002_85053642_1;At_S0002_85053642_2;At_S0002_85053642_3;	-	-
At02	At_S0002	p5	AAAATAAAATAAAATAAAAT	87845103	GOBAR_AA26719	87842168	87849897	-	GO:0000221|GO:0015991|GO:0016820|GO:0000221|GO:0015991|GO:0046961|GO:0005488|GO:0005515|GO:0020037|	vacuolar proton-transporting V-type ATPase, V1 domain|ATP hydrolysis coupled proton transport|hydrolase activity, acting on acid anhydrides, catalyzing transmembrane movement of substances|vacuolar proton-transporting V-type ATPase, V1 domain|ATP hydrolysis coupled proton transport|proton-transporting ATPase activity, rotational mechanism|binding|protein binding|heme binding|	ko00190|ko04145|ko04142|ko04721|ko05323|ko05110|ko05120|ko05152|	Oxidative phosphorylation |Phagosome |Lysosome |Synaptic vesicle cycle |Rheumatoid arthritis |Vibrio cholerae infection |Epithelial cell signaling in Helicobacter pylori infection |Tuberculosis |	K02144	At_S0002_87845103_1;At_S0002_87845103_2;At_S0002_87845103_3;	-	-	-
At02	At_S0002	p4	CCACCCACCCACCCACCCAC	87848474	GOBAR_AA26719	87842168	87849897	-	GO:0000221|GO:0015991|GO:0016820|GO:0000221|GO:0015991|GO:0046961|GO:0005488|GO:0005515|GO:0020037|	vacuolar proton-transporting V-type ATPase, V1 domain|ATP hydrolysis coupled proton transport|hydrolase activity, acting on acid anhydrides, catalyzing transmembrane movement of substances|vacuolar proton-transporting V-type ATPase, V1 domain|ATP hydrolysis coupled proton transport|proton-transporting ATPase activity, rotational mechanism|binding|protein binding|heme binding|	ko00190|ko04145|ko04142|ko04721|ko05323|ko05110|ko05120|ko05152|	Oxidative phosphorylation |Phagosome |Lysosome |Synaptic vesicle cycle |Rheumatoid arthritis |Vibrio cholerae infection |Epithelial cell signaling in Helicobacter pylori infection |Tuberculosis |	K02144	-	At_S0002_87848474_1;At_S0002_87848474_2;At_S0002_87848474_3;	-	-
At02	At_S0002	p1	TTTTTTTTTTTTTTTTTTTT	87859261	GOBAR_AA26720	87852865	87861356	+	GO:0016773|	phosphotransferase activity, alcohol group as acceptor|	-	-	-	At_S0002_87859261_1;At_S0002_87859261_2;At_S0002_87859261_3;	-	-	-
At02	At_S0002	p5	AGAACAGAACAGAACAGAAC	88372896	GOBAR_AA14980	88369759	88373299	-	-	-	-	-	-	-	At_S0002_88372896_1;At_S0002_88372896_2;At_S0002_88372896_3;	-	-
At02	At_S0002	p3	AATAATAATAATAATAATAAT	89086668	GOBAR_AA00970	89086589	89089176	-	GO:0008152|GO:0016787|	metabolic process|hydrolase activity|	-	-	-	-	At_S0002_89086668_1;At_S0002_89086668_2;At_S0002_89086668_3;	-	-
At02	At_S0002	p5	TTTTATTTTATTTTATTTTA	89106916	GOBAR_AA00968	89106517	89107693	-	-	-	-	-	-	At_S0002_89106916_1;At_S0002_89106916_2;At_S0002_89106916_3;	-	-	-
At02	At_S0002	p3	CAGCAGCAGCAGCAGCAGCAG	90144811	GOBAR_AA01737	90144685	90145404	+	GO:0003677|	DNA binding|	-	-	-	-	At_S0002_90144811_1;At_S0002_90144811_2;At_S0002_90144811_3;	-	-
At02	At_S0002	p1	TTTTTTTTTTTTTTTTTT	90599738	GOBAR_AA01751	90597802	90603172	+	GO:0004553|GO:0005975|GO:0005975|GO:0007015|GO:0051015|	hydrolase activity, hydrolyzing O-glycosyl compounds|carbohydrate metabolic process|carbohydrate metabolic process|actin filament organization|actin filament binding|	-	-	-	-	At_S0002_90599738_1;At_S0002_90599738_2;At_S0002_90599738_3;	-	-
At02	At_S0002	p5	TAAATTAAATTAAATTAAAT	90600600	GOBAR_AA01751	90597802	90603172	+	GO:0004553|GO:0005975|GO:0005975|GO:0007015|GO:0051015|	hydrolase activity, hydrolyzing O-glycosyl compounds|carbohydrate metabolic process|carbohydrate metabolic process|actin filament organization|actin filament binding|	-	-	-	-	-	-	-
At02	At_S0002	p2	AGAGAGAGAGAGAGAGAG	90607014	GOBAR_AA01752	90605827	90609935	+	GO:0005737|GO:0006633|GO:0016836|	cytoplasm|fatty acid biosynthetic process|hydro-lyase activity|	ko01212|ko00061|ko00780|	Fatty acid metabolism |Fatty acid biosynthesis |Biotin metabolism |	K02372	-	At_S0002_90607014_1;At_S0002_90607014_2;At_S0002_90607014_3;	-	-
At02	At_S0002	p2	CACACACACACACACACA	90936256	GOBAR_AA33104	90935284	90939388	-	-	-	-	-	K09140	At_S0002_90936256_2;At_S0002_90936256_3;	At_S0002_90936256_1;	-	-
At02	At_S0002	p3	TGGTGGTGGTGGTGGTGG	91148832	GOBAR_AA19685	91148338	91148979	-	GO:0005515|GO:0008270|	protein binding|zinc ion binding|	-	-	-	-	At_S0002_91148832_1;At_S0002_91148832_2;At_S0002_91148832_3;	-	-
At02	At_S0002	p6	TGATGGTGATGGTGATGGTGATGG	91287587	GOBAR_AA19569	91287280	91287993	-	GO:0005634|GO:0006355|GO:0043565|GO:0046982|	nucleus|regulation of transcription, DNA-templated|sequence-specific DNA binding|protein heterodimerization activity|	-	-	-	-	At_S0002_91287587_1;At_S0002_91287587_2;At_S0002_91287587_3;	-	-
At02	At_S0002	p3	TTCTTCTTCTTCTTCTTC	91758847	GOBAR_AA21933	91758587	91759759	+	GO:0003700|GO:0006355|GO:0043565|	transcription factor activity, sequence-specific DNA binding|regulation of transcription, DNA-templated|sequence-specific DNA binding|	-	-	-	At_S0002_91758847_1;At_S0002_91758847_2;At_S0002_91758847_3;	-	-	-
At02	At_S0002	p1	TTTTTTTTTTTTTTTTTTTTTTT	91766265	GOBAR_AA21935	91765455	91770187	-	GO:0005524|GO:0016887|	ATP binding|ATPase activity|	-	-	-	At_S0002_91766265_1;At_S0002_91766265_2;At_S0002_91766265_3;	-	-	-
At02	At_S0002	p6	GAAAGGGAAAGGGAAAGG	92140426	GOBAR_AA16273	92140177	92147311	+	GO:0000166|GO:0003676|GO:0003723|GO:0005634|GO:0006397|	nucleotide binding|nucleic acid binding|RNA binding|nucleus|mRNA processing|	-	-	K13091	-	-	At_S0002_92140426_1;At_S0002_92140426_2;At_S0002_92140426_3;	-
At02	At_S0002	p6	GAGAAAGAGAAAGAGAAA	92140549	GOBAR_AA16273	92140177	92147311	+	GO:0000166|GO:0003676|GO:0003723|GO:0005634|GO:0006397|	nucleotide binding|nucleic acid binding|RNA binding|nucleus|mRNA processing|	-	-	K13091	-	-	-	At_S0002_92140549_1;At_S0002_92140549_2;At_S0002_92140549_3;
At02	At_S0002	p6	GAGAAAGAGAAAGAGAAA	92141373	GOBAR_AA16273	92140177	92147311	+	GO:0000166|GO:0003676|GO:0003723|GO:0005634|GO:0006397|	nucleotide binding|nucleic acid binding|RNA binding|nucleus|mRNA processing|	-	-	K13091	-	-	-	At_S0002_92141373_1;At_S0002_92141373_2;At_S0002_92141373_3;
At02	At_S0002	p2	ACACACACACACACACACACACAC	92227278	GOBAR_AA16276	92227137	92234400	-	GO:0005515|GO:0008270|GO:0016020|GO:0016760|GO:0030244|	protein binding|zinc ion binding|membrane|cellulose synthase (UDP-forming) activity|cellulose biosynthetic process|	-	-	K10999	-	At_S0002_92227278_1;At_S0002_92227278_2;At_S0002_92227278_3;	-	-
At02	At_S0002	p2	AGAGAGAGAGAGAGAGAGAGAGAGAGAGAGAGAGAGAGAGAGAG	92234025	GOBAR_AA16276	92227137	92234400	-	GO:0005515|GO:0008270|GO:0016020|GO:0016760|GO:0030244|	protein binding|zinc ion binding|membrane|cellulose synthase (UDP-forming) activity|cellulose biosynthetic process|	-	-	K10999	At_S0002_92234025_1;At_S0002_92234025_2;At_S0002_92234025_3;	-	-	-
At02	At_S0002	p6	ATAAATATAAATATAAAT	93513152	GOBAR_AA06962	93512754	93517733	+	GO:0000166|GO:0003676|	nucleotide binding|nucleic acid binding|	-	-	-	At_S0002_93513152_1;At_S0002_93513152_2;At_S0002_93513152_3;	-	-	-
At02	At_S0002	p6	ATTTTTATTTTTATTTTT	93536712	GOBAR_AA06963	93535638	93543520	-	GO:0004045|	aminoacyl-tRNA hydrolase activity|	-	-	K04794	At_S0002_93536712_1;	At_S0002_93536712_2;At_S0002_93536712_3;	-	-
At02	At_S0002	p3	TAATAATAATAATAATAA	93540746	GOBAR_AA06963	93535638	93543520	-	GO:0004045|	aminoacyl-tRNA hydrolase activity|	-	-	K04794	-	At_S0002_93540746_1;At_S0002_93540746_2;At_S0002_93540746_3;	-	-
At02	At_S0002	p6	GGCGGAGGCGGAGGCGGA	93810228	GOBAR_AA06976	93810026	93810875	-	GO:0005515|	protein binding|	-	-	-	At_S0002_93810228_1;At_S0002_93810228_2;At_S0002_93810228_3;	-	-	-
At02	At_S0002	p6	TTTTATTTTTATTTTTAT	93940891	GOBAR_AA31940	93933332	93944373	+	-	-	-	-	-	-	At_S0002_93940891_1;	-	At_S0002_93940891_2;At_S0002_93940891_3;
At02	At_S0002	p6	AAATCCAAATCCAAATCC	94152104	GOBAR_AA13249	94146686	94161123	+	-	-	-	-	K14015	-	-	-	At_S0002_94152104_1;At_S0002_94152104_2;At_S0002_94152104_3;
At02	At_S0002	p6	TGGCAATGGCAATGGCAATGGCAA	94399366	GOBAR_AA30755	94398945	94402163	+	-	-	-	-	-	-	-	At_S0002_94399366_1;At_S0002_94399366_2;At_S0002_94399366_3;	-
At02	At_S0002	p6	TAAATTTAAATTTAAATT	94416738	GOBAR_AA30754	94416642	94418246	+	GO:0003677|GO:0003700|GO:0006355|	DNA binding|transcription factor activity, sequence-specific DNA binding|regulation of transcription, DNA-templated|	-	-	K09286	At_S0002_94416738_1;At_S0002_94416738_2;At_S0002_94416738_3;	-	-	-
At02	At_S0002	p2	AGAGAGAGAGAGAGAGAG	94416921	GOBAR_AA30754	94416642	94418246	+	GO:0003677|GO:0003700|GO:0006355|	DNA binding|transcription factor activity, sequence-specific DNA binding|regulation of transcription, DNA-templated|	-	-	K09286	-	At_S0002_94416921_1;At_S0002_94416921_2;At_S0002_94416921_3;	-	-
At02	At_S0002	p3	TCATCATCATCATCATCATCATCA	94418070	GOBAR_AA30754	94416642	94418246	+	GO:0003677|GO:0003700|GO:0006355|	DNA binding|transcription factor activity, sequence-specific DNA binding|regulation of transcription, DNA-templated|	-	-	K09286	-	At_S0002_94418070_1;At_S0002_94418070_2;At_S0002_94418070_3;	-	-
At02	At_S0002	p6	TAAAAATAAAAATAAAAATAAAAA	94622932	GOBAR_AA01381	94620760	94625449	-	GO:0003824|GO:0005975|GO:0030246|GO:0030246|	catalytic activity|carbohydrate metabolic process|carbohydrate binding|carbohydrate binding|	-	-	-	-	At_S0002_94622932_1;At_S0002_94622932_2;At_S0002_94622932_3;	-	-
At02	At_S0002	p6	GCAACAGCAACAGCAACA	95155922	GOBAR_AA18043	95155916	95157004	+	-	-	-	-	-	-	At_S0002_95155922_1;At_S0002_95155922_2;At_S0002_95155922_3;	-	-
At02	At_S0002	p3	ATAATAATAATAATAATA	95487904	GOBAR_AA17712	95487818	95491836	+	GO:0004506|GO:0016021|GO:0050660|GO:0055114|GO:0016491|GO:0055114|	squalene monooxygenase activity|integral component of membrane|flavin adenine dinucleotide binding|oxidation-reduction process|oxidoreductase activity|oxidation-reduction process|	ko00100|ko00909|	Steroid biosynthesis |Sesquiterpenoid and triterpenoid biosynthesis |	K00511	-	At_S0002_95487904_1;At_S0002_95487904_2;At_S0002_95487904_3;	-	-
At02	At_S0002	p3	GAAGAAGAAGAAGAAGAAGAAGAAGAA	95497884	GOBAR_AA17714	95495889	95498122	-	-	-	-	-	-	-	-	At_S0002_95497884_1;At_S0002_95497884_2;At_S0002_95497884_3;	-
At02	At_S0002	p6	AAAATAAAAATAAAAATA	95507776	GOBAR_AA17715	95504647	95511022	+	-	-	-	-	-	-	At_S0002_95507776_1;At_S0002_95507776_2;At_S0002_95507776_3;	-	-
At02	At_S0002	p3	GACGACGACGACGACGAC	95678209	GOBAR_AA21902	95677953	95681289	+	-	-	-	-	-	-	At_S0002_95678209_1;At_S0002_95678209_2;At_S0002_95678209_3;	-	-
At02	At_S0002	p3	GTGGTGGTGGTGGTGGTGGTGGTGGTGGTGGTG	95810775	GOBAR_AA35503	95808785	95810899	+	-	-	-	-	-	-	At_S0002_95810775_1;At_S0002_95810775_2;At_S0002_95810775_3;	-	-
At02	At_S0002	p3	TGGTGGTGGTGGTGGTGGTGG	95814261	GOBAR_AA35502	95814181	95817223	-	GO:0000166|GO:0003676|GO:0046872|	nucleotide binding|nucleic acid binding|metal ion binding|	ko03040|	Spliceosome |	K12872	-	At_S0002_95814261_1;At_S0002_95814261_2;At_S0002_95814261_3;	-	-
At02	At_S0002	p6	CATCAGCATCAGCATCAG	96008899	GOBAR_AA37886	96008534	96009224	-	-	-	-	-	-	-	-	At_S0002_96008899_1;At_S0002_96008899_2;At_S0002_96008899_3;	-
At02	At_S0002	p6	TCAAACTCAAACTCAAAC	96189430	GOBAR_AA12268	96186559	96194828	-	GO:0005515|	protein binding|	ko04310|	Wnt signaling pathway |	K04508	-	-	At_S0002_96189430_1;At_S0002_96189430_2;At_S0002_96189430_3;	-
At02	At_S0002	p2	AGAGAGAGAGAGAGAGAGAGAG	96192598	GOBAR_AA12268	96186559	96194828	-	GO:0005515|	protein binding|	ko04310|	Wnt signaling pathway |	K04508	-	At_S0002_96192598_1;At_S0002_96192598_2;At_S0002_96192598_3;	-	-
At02	At_S0002	p6	TCTTTATCTTTATCTTTA	96193206	GOBAR_AA12268	96186559	96194828	-	GO:0005515|	protein binding|	ko04310|	Wnt signaling pathway |	K04508	-	At_S0002_96193206_1;At_S0002_96193206_2;At_S0002_96193206_3;	-	-
At02	At_S0002	p2	ATATATATATATATATAT	96259764	GOBAR_AA12275	96257847	96260367	+	GO:0005515|	protein binding|	-	-	-	-	At_S0002_96259764_1;At_S0002_96259764_2;At_S0002_96259764_3;	-	-
At02	At_S0002	p3	CATCATCATCATCATCATCATCATCATCATCATCAT	96366354	GOBAR_AA32043	96366006	96366515	+	GO:0003677|GO:0003700|GO:0006355|	DNA binding|transcription factor activity, sequence-specific DNA binding|regulation of transcription, DNA-templated|	-	-	-	-	At_S0002_96366354_1;At_S0002_96366354_2;At_S0002_96366354_3;	-	-
At02	At_S0002	p2	ACACACACACACACACAC	96378654	GOBAR_AA32042	96376128	96379562	-	-	-	-	-	-	At_S0002_96378654_1;At_S0002_96378654_2;At_S0002_96378654_3;	-	-	-
At02	At_S0002	p6	TATATGTATATGTATATG	96447869	GOBAR_AA38229	96444847	96448307	-	-	-	-	-	-	-	At_S0002_96447869_1;At_S0002_96447869_2;At_S0002_96447869_3;	-	-
At02	At_S0002	p6	TACTGTTACTGTTACTGT	96732768	GOBAR_AA18071	96721607	96736474	+	GO:0005634|	nucleus|	-	-	K14774	-	-	-	At_S0002_96732768_1;At_S0002_96732768_2;At_S0002_96732768_3;
At02	At_S0002	p3	GAAGAAGAAGAAGAAGAAGAAGAAGAAGAAGAAGAAGAAGAAGAA	97177255	GOBAR_AA37970	97176680	97178144	+	GO:0003677|	DNA binding|	-	-	-	-	At_S0002_97177255_1;At_S0002_97177255_2;At_S0002_97177255_3;	-	-
At02	At_S0002	p6	GAGGGCGAGGGCGAGGGCGAGGGC	97210776	GOBAR_AA36120	97210244	97211116	-	GO:0003677|	DNA binding|	-	-	-	-	At_S0002_97210776_1;At_S0002_97210776_2;At_S0002_97210776_3;	-	-
At02	At_S0002	p3	TTCTTCTTCTTCTTCTTC	97324469	GOBAR_AA24563	97322587	97324883	-	GO:0005515|	protein binding|	-	-	-	-	At_S0002_97324469_1;At_S0002_97324469_2;At_S0002_97324469_3;	-	-
At02	At_S0002	p3	CAACAACAACAACAACAACAA	97324604	GOBAR_AA24563	97322587	97324883	-	GO:0005515|	protein binding|	-	-	-	At_S0002_97324604_1;At_S0002_97324604_2;At_S0002_97324604_3;	-	-	-
At02	At_S0002	p6	GGCCTTGGCCTTGGCCTTGGCCTTGGCCTT	97459495	GOBAR_AA24576	97457696	97460095	-	GO:0003677|GO:0003677|GO:0006355|	DNA binding|DNA binding|regulation of transcription, DNA-templated|	-	-	-	-	At_S0002_97459495_1;At_S0002_97459495_2;At_S0002_97459495_3;	-	-
At02	At_S0002	p6	TTTATTTTTATTTTTATTTTTATT	97497668	GOBAR_AA28874	97495641	97497999	+	-	-	-	-	-	-	At_S0002_97497668_1;At_S0002_97497668_2;At_S0002_97497668_3;	-	-
At02	At_S0002	p1	TTTTTTTTTTTTTTTTTT	97542183	GOBAR_AA28871	97540327	97543344	-	-	-	-	-	-	At_S0002_97542183_1;At_S0002_97542183_2;At_S0002_97542183_3;	-	-	-
At02	At_S0002	p6	CCAGAACCAGAACCAGAA	97698326	GOBAR_AA35927	97697709	97700884	+	-	-	-	-	-	-	At_S0002_97698326_1;At_S0002_97698326_2;At_S0002_97698326_3;	-	-
At02	At_S0002	p6	GAATTTGAATTTGAATTTGAATTT	97731563	GOBAR_AA19971	97731370	97735275	+	-	-	-	-	-	-	At_S0002_97731563_1;At_S0002_97731563_2;At_S0002_97731563_3;	-	-
At02	At_S0002	p6	TTCTTTTTCTTTTTCTTT	97784263	GOBAR_AA19976	97783101	97793227	+	GO:0005515|	protein binding|	-	-	-	At_S0002_97784263_1;At_S0002_97784263_2;At_S0002_97784263_3;	-	-	-
At02	At_S0002	p6	ATATCTATATCTATATCT	97838437	GOBAR_AA19981	97837977	97838765	+	GO:0003700|GO:0006355|GO:0008270|GO:0043565|GO:0006355|GO:0008270|	transcription factor activity, sequence-specific DNA binding|regulation of transcription, DNA-templated|zinc ion binding|sequence-specific DNA binding|regulation of transcription, DNA-templated|zinc ion binding|	-	-	-	-	At_S0002_97838437_1;At_S0002_97838437_2;At_S0002_97838437_3;	-	-
At02	At_S0002	p3	TCTTCTTCTTCTTCTTCT	97885540	GOBAR_AA19987	97885408	97889862	+	-	-	-	-	-	-	At_S0002_97885540_1;At_S0002_97885540_2;At_S0002_97885540_3;	-	-
At02	At_S0002	p3	GGTGGTGGTGGTGGTGGT	98036679	GOBAR_AA23355	98035453	98037522	+	-	-	-	-	-	-	-	At_S0002_98036679_1;At_S0002_98036679_2;At_S0002_98036679_3;	-
At02	At_S0002	p2	ATATATATATATATATAT	98049364	GOBAR_AA23354	98045638	98051536	-	GO:0008152|GO:0016491|GO:0016620|GO:0055114|GO:0008152|GO:0016491|GO:0055114|	metabolic process|oxidoreductase activity|oxidoreductase activity, acting on the aldehyde or oxo group of donors, NAD or NADP as acceptor|oxidation-reduction process|metabolic process|oxidoreductase activity|oxidation-reduction process|	-	-	K00128	At_S0002_98049364_1;At_S0002_98049364_2;At_S0002_98049364_3;	-	-	-
At02	At_S0002	p3	TAATAATAATAATAATAATAATAATAA	98050366	GOBAR_AA23354	98045638	98051536	-	GO:0008152|GO:0016491|GO:0016620|GO:0055114|GO:0008152|GO:0016491|GO:0055114|	metabolic process|oxidoreductase activity|oxidoreductase activity, acting on the aldehyde or oxo group of donors, NAD or NADP as acceptor|oxidation-reduction process|metabolic process|oxidoreductase activity|oxidation-reduction process|	-	-	K00128	-	At_S0002_98050366_1;At_S0002_98050366_2;At_S0002_98050366_3;	-	-
At02	At_S0002	p4	TGTATGTATGTATGTATGTATGTATGTATGTATGTATGTA	98051303	GOBAR_AA23354	98045638	98051536	-	GO:0008152|GO:0016491|GO:0016620|GO:0055114|GO:0008152|GO:0016491|GO:0055114|	metabolic process|oxidoreductase activity|oxidoreductase activity, acting on the aldehyde or oxo group of donors, NAD or NADP as acceptor|oxidation-reduction process|metabolic process|oxidoreductase activity|oxidation-reduction process|	-	-	K00128	-	At_S0002_98051303_1;At_S0002_98051303_2;At_S0002_98051303_3;	-	-
At02	At_S0002	p6	CCTAAGCCTAAGCCTAAGCCTAAG	98142024	GOBAR_AA23341	98141963	98145161	-	GO:0003723|GO:0003735|GO:0006412|GO:0015934|GO:0003735|GO:0005622|GO:0005840|GO:0006412|GO:0003735|GO:0005840|GO:0006412|	RNA binding|structural constituent of ribosome|translation|large ribosomal subunit|structural constituent of ribosome|intracellular|ribosome|translation|structural constituent of ribosome|ribosome|translation|	ko03010|	Ribosome |	K02938	-	At_S0002_98142024_1;At_S0002_98142024_2;At_S0002_98142024_3;	-	-
At02	At_S0002	p2	ATATATATATATATATAT	98174728	GOBAR_AA30653	98171969	98174931	-	GO:0008152|GO:0016491|GO:0016620|GO:0055114|GO:0008152|GO:0016491|GO:0055114|	metabolic process|oxidoreductase activity|oxidoreductase activity, acting on the aldehyde or oxo group of donors, NAD or NADP as acceptor|oxidation-reduction process|metabolic process|oxidoreductase activity|oxidation-reduction process|	ko00010|ko00040|ko00053|ko00620|ko00071|ko00561|ko00280|ko00310|ko00330|ko00340|ko00380|ko00410|ko00903|ko00625|	Glycolysis / Gluconeogenesis |Pentose and glucuronate interconversions |Ascorbate and aldarate metabolism |Pyruvate metabolism |Fatty acid degradation |Glycerolipid metabolism |Valine, leucine and isoleucine degradation |Lysine degradation |Arginine and proline metabolism |Histidine metabolism |Tryptophan metabolism |beta-Alanine metabolism |Limonene and pinene degradation |Chloroalkane and chlor…	K00128	-	-	At_S0002_98174728_1;At_S0002_98174728_2;At_S0002_98174728_3;	-
At02	At_S0002	p6	CACCGCCACCGCCACCGC	98264609	GOBAR_AA30646	98263002	98270452	+	GO:0005515|	protein binding|	ko03015|	mRNA surveillance pathway |	K14962	At_S0002_98264609_1;At_S0002_98264609_2;At_S0002_98264609_3;	-	-	-
At02	At_S0002	p1	TTTTTTTTTTTTTTTTTTTTTTTTTTTTT	98295610	GOBAR_AA20850	98294012	98298819	-	-	-	-	-	-	-	-	-	-
At02	At_S0002	p1	TTTTTTTTTTTTTTTTTTT	98296960	GOBAR_AA20850	98294012	98298819	-	-	-	-	-	-	-	At_S0002_98296960_1;At_S0002_98296960_2;At_S0002_98296960_3;	-	-
At02	At_S0002	p4	GTATGTATGTATGTATGTATGTATGTATGTATGTATGTAT	98304910	GOBAR_AA20851	98304297	98307106	+	GO:0004601|GO:0006979|GO:0020037|GO:0055114|GO:0004601|GO:0055114|	peroxidase activity|response to oxidative stress|heme binding|oxidation-reduction process|peroxidase activity|oxidation-reduction process|	ko00053|ko00480|	Ascorbate and aldarate metabolism |Glutathione metabolism |	K00434	-	At_S0002_98304910_1;At_S0002_98304910_2;At_S0002_98304910_3;	-	-
At02	At_S0002	p3	AAGAAGAAGAAGAAGAAG	98330251	GOBAR_AA20854	98324639	98331418	-	-	-	ko04144|	Endocytosis |	-	-	-	At_S0002_98330251_1;At_S0002_98330251_2;At_S0002_98330251_3;	-
At02	At_S0002	p2	ACACACACACACACACACACACAC	98337042	GOBAR_AA20855	98332754	98340805	-	GO:0003824|GO:0005975|GO:0003824|GO:0005975|GO:0030246|GO:0004553|GO:0008270|GO:0004559|GO:0005975|GO:0006013|GO:0015923|	catalytic activity|carbohydrate metabolic process|catalytic activity|carbohydrate metabolic process|carbohydrate binding|hydrolase activity, hydrolyzing O-glycosyl compounds|zinc ion binding|alpha-mannosidase activity|carbohydrate metabolic process|mannose metabolic process|mannosidase activity|	ko00511|	Other glycan degradation |	-	At_S0002_98337042_1;	-	At_S0002_98337042_2;At_S0002_98337042_3;	-
At02	At_S0002	p5	AATTCAATTCAATTCAATTC	98352242	GOBAR_AA20858	98349802	98353017	-	GO:0005515|GO:0008270|	protein binding|zinc ion binding|	-	-	-	-	At_S0002_98352242_1;At_S0002_98352242_2;At_S0002_98352242_3;	-	-
At02	At_S0002	p4	TATGTATGTATGTATGTATGTATG	98390557	GOBAR_AA20864	98390387	98392290	+	GO:0046983|	protein dimerization activity|	-	-	-	-	At_S0002_98390557_2;	At_S0002_98390557_1;At_S0002_98390557_3;	-
At02	At_S0002	p5	AAAAGAAAAGAAAAGAAAAG	98480092	GOBAR_AA36435	98477341	98481750	-	GO:0004190|GO:0006508|	aspartic-type endopeptidase activity|proteolysis|	-	-	-	At_S0002_98480092_1;At_S0002_98480092_2;At_S0002_98480092_3;	-	-	-
At02	At_S0002	p3	TGTTGTTGTTGTTGTTGT	98501807	GOBAR_AA36437	98500751	98505166	+	-	-	-	-	-	-	-	-	-
At02	At_S0002	p3	TGTTGTTGTTGTTGTTGT	98503036	GOBAR_AA36437	98500751	98505166	+	-	-	-	-	-	-	-	-	At_S0002_98503036_1;At_S0002_98503036_2;At_S0002_98503036_3;
At02	At_S0002	p5	GTTTTGTTTTGTTTTGTTTTGTTTT	98506771	GOBAR_AA36438	98505593	98511771	-	GO:0004672|GO:0005524|GO:0006468|GO:0004672|GO:0006468|GO:0005524|	protein kinase activity|ATP binding|protein phosphorylation|protein kinase activity|protein phosphorylation|ATP binding|	ko04064|ko04620|ko04722|ko05133|ko05152|ko05162|ko05169|ko05145|ko05140|ko05142|	NF-kappa B signaling pathway |Toll-like receptor signaling pathway |Neurotrophin signaling pathway |Pertussis |Tuberculosis |Measles |Epstein-Barr virus infection |Toxoplasmosis |Leishmaniasis |Chagas disease (American trypanosomiasis) |	-	-	-	-	At_S0002_98506771_1;At_S0002_98506771_2;At_S0002_98506771_3;
At02	At_S0002	p5	GTTTTGTTTTGTTTTGTTTT	98507495	GOBAR_AA36438	98505593	98511771	-	GO:0004672|GO:0005524|GO:0006468|GO:0004672|GO:0006468|GO:0005524|	protein kinase activity|ATP binding|protein phosphorylation|protein kinase activity|protein phosphorylation|ATP binding|	ko04064|ko04620|ko04722|ko05133|ko05152|ko05162|ko05169|ko05145|ko05140|ko05142|	NF-kappa B signaling pathway |Toll-like receptor signaling pathway |Neurotrophin signaling pathway |Pertussis |Tuberculosis |Measles |Epstein-Barr virus infection |Toxoplasmosis |Leishmaniasis |Chagas disease (American trypanosomiasis) |	-	-	-	-	At_S0002_98507495_1;At_S0002_98507495_2;At_S0002_98507495_3;
At02	At_S0002	p2	TGTGTGTGTGTGTGTGTGTGTGTGTGTG	98508529	GOBAR_AA36438	98505593	98511771	-	GO:0004672|GO:0005524|GO:0006468|GO:0004672|GO:0006468|GO:0005524|	protein kinase activity|ATP binding|protein phosphorylation|protein kinase activity|protein phosphorylation|ATP binding|	ko04064|ko04620|ko04722|ko05133|ko05152|ko05162|ko05169|ko05145|ko05140|ko05142|	NF-kappa B signaling pathway |Toll-like receptor signaling pathway |Neurotrophin signaling pathway |Pertussis |Tuberculosis |Measles |Epstein-Barr virus infection |Toxoplasmosis |Leishmaniasis |Chagas disease (American trypanosomiasis) |	-	-	-	At_S0002_98508529_1;At_S0002_98508529_2;At_S0002_98508529_3;	-
At02	At_S0002	p2	TGTGTGTGTGTGTGTGTGTGTGTGTGTG	98509787	GOBAR_AA36438	98505593	98511771	-	GO:0004672|GO:0005524|GO:0006468|GO:0004672|GO:0006468|GO:0005524|	protein kinase activity|ATP binding|protein phosphorylation|protein kinase activity|protein phosphorylation|ATP binding|	ko04064|ko04620|ko04722|ko05133|ko05152|ko05162|ko05169|ko05145|ko05140|ko05142|	NF-kappa B signaling pathway |Toll-like receptor signaling pathway |Neurotrophin signaling pathway |Pertussis |Tuberculosis |Measles |Epstein-Barr virus infection |Toxoplasmosis |Leishmaniasis |Chagas disease (American trypanosomiasis) |	-	At_S0002_98509787_1;At_S0002_98509787_2;At_S0002_98509787_3;	-	-	-
At02	At_S0002	p4	TGTATGTATGTATGTATGTATGTATGTATGTA	98554989	GOBAR_AA09362	98550345	98561439	+	GO:0003824|GO:0004630|GO:0005509|GO:0016020|GO:0046470|GO:0005515|	catalytic activity|phospholipase D activity|calcium ion binding|membrane|phosphatidylcholine metabolic process|protein binding|	ko00564|ko00565|ko04014|ko04072|ko04071|ko04024|ko04144|ko04666|ko04912|ko04724|ko05231|	Glycerophospholipid metabolism |Ether lipid metabolism |Ras signaling pathway |Phospholipase D signaling pathway |Sphingolipid signaling pathway |cAMP signaling pathway |Endocytosis |Fc gamma R-mediated phagocytosis |GnRH signaling pathway |Glutamatergic synapse |Choline metabolism in cancer |	K01115	At_S0002_98554989_1;At_S0002_98554989_2;At_S0002_98554989_3;	-	-	-
At02	At_S0002	p6	CTAGGTCTAGGTCTAGGT	98556711	GOBAR_AA09362	98550345	98561439	+	GO:0003824|GO:0004630|GO:0005509|GO:0016020|GO:0046470|GO:0005515|	catalytic activity|phospholipase D activity|calcium ion binding|membrane|phosphatidylcholine metabolic process|protein binding|	ko00564|ko00565|ko04014|ko04072|ko04071|ko04024|ko04144|ko04666|ko04912|ko04724|ko05231|	Glycerophospholipid metabolism |Ether lipid metabolism |Ras signaling pathway |Phospholipase D signaling pathway |Sphingolipid signaling pathway |cAMP signaling pathway |Endocytosis |Fc gamma R-mediated phagocytosis |GnRH signaling pathway |Glutamatergic synapse |Choline metabolism in cancer |	K01115	-	-	-	At_S0002_98556711_1;At_S0002_98556711_2;At_S0002_98556711_3;
At02	At_S0002	p4	GTTTGTTTGTTTGTTTGTTTGTTT	98556961	GOBAR_AA09362	98550345	98561439	+	GO:0003824|GO:0004630|GO:0005509|GO:0016020|GO:0046470|GO:0005515|	catalytic activity|phospholipase D activity|calcium ion binding|membrane|phosphatidylcholine metabolic process|protein binding|	ko00564|ko00565|ko04014|ko04072|ko04071|ko04024|ko04144|ko04666|ko04912|ko04724|ko05231|	Glycerophospholipid metabolism |Ether lipid metabolism |Ras signaling pathway |Phospholipase D signaling pathway |Sphingolipid signaling pathway |cAMP signaling pathway |Endocytosis |Fc gamma R-mediated phagocytosis |GnRH signaling pathway |Glutamatergic synapse |Choline metabolism in cancer |	K01115	-	-	-	At_S0002_98556961_1;At_S0002_98556961_2;At_S0002_98556961_3;
At02	At_S0002	p6	CTAGGTCTAGGTCTAGGT	98557748	GOBAR_AA09362	98550345	98561439	+	GO:0003824|GO:0004630|GO:0005509|GO:0016020|GO:0046470|GO:0005515|	catalytic activity|phospholipase D activity|calcium ion binding|membrane|phosphatidylcholine metabolic process|protein binding|	ko00564|ko00565|ko04014|ko04072|ko04071|ko04024|ko04144|ko04666|ko04912|ko04724|ko05231|	Glycerophospholipid metabolism |Ether lipid metabolism |Ras signaling pathway |Phospholipase D signaling pathway |Sphingolipid signaling pathway |cAMP signaling pathway |Endocytosis |Fc gamma R-mediated phagocytosis |GnRH signaling pathway |Glutamatergic synapse |Choline metabolism in cancer |	K01115	-	-	-	At_S0002_98557748_1;At_S0002_98557748_2;At_S0002_98557748_3;
At02	At_S0002	p4	GTTTGTTTGTTTGTTTGTTTGTTT	98557998	GOBAR_AA09362	98550345	98561439	+	GO:0003824|GO:0004630|GO:0005509|GO:0016020|GO:0046470|GO:0005515|	catalytic activity|phospholipase D activity|calcium ion binding|membrane|phosphatidylcholine metabolic process|protein binding|	ko00564|ko00565|ko04014|ko04072|ko04071|ko04024|ko04144|ko04666|ko04912|ko04724|ko05231|	Glycerophospholipid metabolism |Ether lipid metabolism |Ras signaling pathway |Phospholipase D signaling pathway |Sphingolipid signaling pathway |cAMP signaling pathway |Endocytosis |Fc gamma R-mediated phagocytosis |GnRH signaling pathway |Glutamatergic synapse |Choline metabolism in cancer |	K01115	-	-	-	At_S0002_98557998_1;At_S0002_98557998_2;At_S0002_98557998_3;
At02	At_S0002	p5	AAAAGAAAAGAAAAGAAAAG	98623514	GOBAR_AA31929	98621715	98624094	-	GO:0003824|GO:0008152|	catalytic activity|metabolic process|	-	-	-	At_S0002_98623514_3;	At_S0002_98623514_1;At_S0002_98623514_2;	-	-
At02	At_S0002	p2	ATATATATATATATATAT	98630669	GOBAR_AA31930	98629503	98631839	+	GO:0003677|GO:0005634|	DNA binding|nucleus|	-	-	-	At_S0002_98630669_1;At_S0002_98630669_2;At_S0002_98630669_3;	-	-	-
At02	At_S0002	p5	AAAAGAAAAGAAAAGAAAAGAAAAG	98677929	GOBAR_AA31475	98677319	98686692	-	GO:0005515|	protein binding|	-	-	-	-	-	-	At_S0002_98677929_1;At_S0002_98677929_2;At_S0002_98677929_3;
At03	At_S0003	p5	AGAGAAGAGAAGAGAAGAGA	3312	GOBAR_AA23654	53	3352	-	GO:0004672|GO:0005524|GO:0006468|GO:0004672|GO:0006468|GO:0005524|	protein kinase activity|ATP binding|protein phosphorylation|protein kinase activity|protein phosphorylation|ATP binding|	-	-	K08829	At_S0003_3312_1;At_S0003_3312_2;At_S0003_3312_3;	-	-	-
At03	At_S0288	p4	TAAATAAATAAATAAATAAA	6338	GOBAR_AA10878	3625	6735	-	GO:0055085|	transmembrane transport|	-	-	K15276	-	At_S0288_6338_1;At_S0288_6338_2;At_S0288_6338_3;	-	-
At03	At_S0163	p6	ACCATCACCATCACCATCACCATC	13908	GOBAR_AA06037	13542	15755	-	GO:0005515|GO:0051087|	protein binding|chaperone binding|	-	-	-	-	At_S0163_13908_1;At_S0163_13908_2;At_S0163_13908_3;	-	-
At03	At_S0311	p6	TTTTCTTTTTCTTTTTCT	21860	GOBAR_AA11919	18757	28501	+	GO:0005488|GO:0005515|GO:0006886|GO:0008536|	binding|protein binding|intracellular protein transport|Ran GTPase binding|	-	-	-	-	At_S0311_21860_1;At_S0311_21860_2;At_S0311_21860_3;	-	-
At03	At_S0003	p1	TTTTTTTTTTTTTTTTTTT	23127	GOBAR_AA23656	18886	30390	+	GO:0008289|	lipid binding|	-	-	-	-	At_S0003_23127_1;At_S0003_23127_2;At_S0003_23127_3;	-	-
At03	At_S0536	p6	ATTTTTATTTTTATTTTT	25488	GOBAR_AA21100	18789	33867	+	GO:0000166|GO:0000398|GO:0003723|GO:0089701|GO:0003676|GO:0046872|	nucleotide binding|mRNA splicing, via spliceosome|RNA binding|U2AF|nucleic acid binding|metal ion binding|	-	-	-	-	At_S0536_25488_1;At_S0536_25488_2;At_S0536_25488_3;	-	-
At03	At_S0172	p6	CCACAACCACAACCACAACCACAA	25630	GOBAR_AA06231	22761	45373	+	GO:0003779|	actin binding|	-	-	-	-	At_S0172_25630_1;At_S0172_25630_2;At_S0172_25630_3;	-	-
At03	At_S0192	p2	AGAGAGAGAGAGAGAGAGAG	26814	GOBAR_AA07221	26231	27990	-	-	-	-	-	-	-	At_S0192_26814_1;At_S0192_26814_2;At_S0192_26814_3;	-	-
At03	At_S0258	p4	GGTGGGTGGGTGGGTGGGTGGGTG	27239	GOBAR_AA10255	24442	27698	-	GO:0008289|	lipid binding|	-	-	-	-	At_S0258_27239_1;At_S0258_27239_2;At_S0258_27239_3;	-	-
At03	At_S0258	p3	AAGAAGAAGAAGAAGAAG	31680	GOBAR_AA10256	30501	31866	-	GO:0008289|	lipid binding|	-	-	-	At_S0258_31680_1;At_S0258_31680_2;At_S0258_31680_3;	-	-	-
At03	At_S0035	p6	ATTTTTATTTTTATTTTT	40803	GOBAR_AA01018	38641	42496	+	-	-	-	-	K00472	-	At_S0035_40803_1;At_S0035_40803_2;At_S0035_40803_3;	-	-
At03	At_S0003	p6	CAAAAACAAAAACAAAAA	44279	GOBAR_AA23658	40395	47608	+	-	-	-	-	-	-	-	At_S0003_44279_1;At_S0003_44279_2;At_S0003_44279_3;	-
At03	At_S0310	p2	ATATATATATATATATATATATAT	51772	GOBAR_AA11906	50698	53922	-	GO:0004568|GO:0006032|GO:0016998|GO:0008061|	chitinase activity|chitin catabolic process|cell wall macromolecule catabolic process|chitin binding|	-	-	K01183	-	-	At_S0310_51772_1;At_S0310_51772_2;	At_S0310_51772_3;
At03	At_S0310	p2	ATATATATATATATATATATATAT	52410	GOBAR_AA11906	50698	53922	-	GO:0004568|GO:0006032|GO:0016998|GO:0008061|	chitinase activity|chitin catabolic process|cell wall macromolecule catabolic process|chitin binding|	-	-	K01183	At_S0310_52410_1;At_S0310_52410_2;At_S0310_52410_3;	-	-	-
At03	At_S0134	p2	GAGAGAGAGAGAGAGAGA	52793	GOBAR_AA05220	50235	54655	+	GO:0006629|GO:0008081|	lipid metabolic process|phosphoric diester hydrolase activity|	-	-	-	-	-	At_S0134_52793_1;At_S0134_52793_2;At_S0134_52793_3;	-
At03	At_S0727	p6	AATGATAATGATAATGAT	63666	GOBAR_AA28282	59561	63847	-	GO:0005215|GO:0006810|GO:0016020|GO:0055085|	transporter activity|transport|membrane|transmembrane transport|	-	-	-	-	-	-	At_S0727_63666_1;At_S0727_63666_2;At_S0727_63666_3;
At03	At_S0003	p6	TGTGCCTGTGCCTGTGCC	69627	GOBAR_AA23662	68266	70786	-	-	-	-	-	-	-	-	-	At_S0003_69627_1;At_S0003_69627_2;At_S0003_69627_3;
At03	At_S0003	p6	TGTGCCTGTGCCTGTGCCTGTGCC	75510	GOBAR_AA23663	75423	82517	-	-	-	-	-	-	-	-	-	At_S0003_75510_1;At_S0003_75510_2;At_S0003_75510_3;
At03	At_S0003	p2	TCTCTCTCTCTCTCTCTC	79501	GOBAR_AA23663	75423	82517	-	-	-	-	-	-	-	-	-	-
At03	At_S0346	p2	GTGTGTGTGTGTGTGTGTGTGTGTGTGT	83873	GOBAR_AA13145	82543	88065	-	-	-	-	-	K13099	-	At_S0346_83873_1;At_S0346_83873_2;At_S0346_83873_3;	-	-
At03	At_S0346	p2	AGAGAGAGAGAGAGAGAGAG	87845	GOBAR_AA13145	82543	88065	-	-	-	-	-	K13099	-	At_S0346_87845_1;At_S0346_87845_2;At_S0346_87845_3;	-	-
At03	At_S0003	p3	AATAATAATAATAATAAT	101807	GOBAR_AA23666	101280	102893	+	-	-	ko04144|	Endocytosis |	K12189	-	At_S0003_101807_1;At_S0003_101807_2;At_S0003_101807_3;	-	-
At03	At_S0346	p4	TTTATTTATTTATTTATTTA	108505	GOBAR_AA13147	99290	111208	+	GO:0000166|GO:0000166|GO:0046872|GO:0006812|GO:0016021|GO:0019829|GO:0016021|GO:0030001|GO:0046872|	nucleotide binding|nucleotide binding|metal ion binding|cation transport|integral component of membrane|cation-transporting ATPase activity|integral component of membrane|metal ion transport|metal ion binding|	-	-	-	-	-	-	-
At03	At_S0346	p6	ACCGCCACCGCCACCGCC	111106	GOBAR_AA13147	99290	111208	+	GO:0000166|GO:0000166|GO:0046872|GO:0006812|GO:0016021|GO:0019829|GO:0016021|GO:0030001|GO:0046872|	nucleotide binding|nucleotide binding|metal ion binding|cation transport|integral component of membrane|cation-transporting ATPase activity|integral component of membrane|metal ion transport|metal ion binding|	-	-	-	-	-	At_S0346_111106_1;At_S0346_111106_2;At_S0346_111106_3;	-
At03	At_S0192	p3	TATTATTATTATTATTATTATTATTATTATTATTATTATTATTATTATTATTATTATTATTAT	111604	GOBAR_AA07222	111146	113253	-	-	-	-	-	-	At_S0192_111604_1;At_S0192_111604_2;At_S0192_111604_3;	-	-	-
At03	At_S0156	p4	TTCATTCATTCATTCATTCA	118766	GOBAR_AA05941	117729	119892	+	GO:0016021|GO:0055085|	integral component of membrane|transmembrane transport|	-	-	K13947	At_S0156_118766_1;At_S0156_118766_2;At_S0156_118766_3;	-	-	-
At03	At_S0156	p3	AATAATAATAATAATAATAATAATAAT	119579	GOBAR_AA05941	117729	119892	+	GO:0016021|GO:0055085|	integral component of membrane|transmembrane transport|	-	-	K13947	At_S0156_119579_1;At_S0156_119579_2;At_S0156_119579_3;	-	-	-
At03	At_S0060	p1	AAAAAAAAAAAAAAAAAAAAAA	129420	GOBAR_AA02132	125820	132917	-	-	-	-	-	-	-	-	-	-
At03	At_S0003	p6	TGGAGATGGAGATGGAGA	157555	GOBAR_AA23674	153565	158183	-	-	-	-	-	-	At_S0003_157555_1;At_S0003_157555_2;At_S0003_157555_3;	-	-	-
At03	At_S0105	p3	GCTGCTGCTGCTGCTGCTGCTGCTGCT	163296	GOBAR_AA03952	163171	174564	-	-	-	-	-	K15168	-	-	-	At_S0105_163296_1;At_S0105_163296_2;At_S0105_163296_3;
At03	At_S0192	p1	AAAAAAAAAAAAAAAAAA	176158	GOBAR_AA07227	174871	176452	-	GO:0006952|GO:0009607|	defense response|response to biotic stimulus|	-	-	-	-	-	At_S0192_176158_1;At_S0192_176158_2;At_S0192_176158_3;	-
At03	At_S0324	p2	AGAGAGAGAGAGAGAGAGAG	188494	GOBAR_AA12398	181893	189044	-	GO:0005515|	protein binding|	-	-	K11274	-	-	At_S0324_188494_1;At_S0324_188494_2;At_S0324_188494_3;	-
At03	At_S0324	p2	AGAGAGAGAGAGAGAGAGAG	188703	GOBAR_AA12398	181893	189044	-	GO:0005515|	protein binding|	-	-	K11274	At_S0324_188703_1;At_S0324_188703_2;At_S0324_188703_3;	-	-	-
At03	At_S0163	p5	ATAAAATAAAATAAAATAAA	220128	GOBAR_AA06045	215473	221612	-	-	-	-	-	-	-	-	At_S0163_220128_2;	At_S0163_220128_1;At_S0163_220128_3;
At03	At_S0163	p3	TTCTTCTTCTTCTTCTTC	260056	GOBAR_AA06048	257669	262136	+	GO:0003824|GO:0009058|GO:0030170|	catalytic activity|biosynthetic process|pyridoxal phosphate binding|	ko00780|	Biotin metabolism |	K00652	-	At_S0163_260056_1;At_S0163_260056_2;At_S0163_260056_3;	-	-
At03	At_S0134	p6	TCTTTTTCTTTTTCTTTT	284274	GOBAR_AA05233	284153	285850	+	-	-	ko04075|	Plant hormone signal transduction |	K13464	-	At_S0134_284274_1;At_S0134_284274_2;At_S0134_284274_3;	-	-
At03	At_S0003	p6	CATATACATATACATATACATATACATATACATATACATATACATATACATATACATATACATATACATATACATATACATATACATATACATATACATATA	296405	GOBAR_AA26226	289414	297905	+	GO:0005524|GO:0006810|GO:0016021|GO:0042626|GO:0055085|GO:0005524|GO:0016887|	ATP binding|transport|integral component of membrane|ATPase activity, coupled to transmembrane movement of substances|transmembrane transport|ATP binding|ATPase activity|	ko02010|ko04976|ko05206|	ABC transporters |Bile secretion |MicroRNAs in cancer |	K05658	-	At_S0003_296405_1;At_S0003_296405_2;At_S0003_296405_3;	-	-
At03	At_S0003	p6	ACATATACATATACATAT	296812	GOBAR_AA26226	289414	297905	+	GO:0005524|GO:0006810|GO:0016021|GO:0042626|GO:0055085|GO:0005524|GO:0016887|	ATP binding|transport|integral component of membrane|ATPase activity, coupled to transmembrane movement of substances|transmembrane transport|ATP binding|ATPase activity|	ko02010|ko04976|ko05206|	ABC transporters |Bile secretion |MicroRNAs in cancer |	K05658	-	At_S0003_296812_1;At_S0003_296812_2;At_S0003_296812_3;	-	-
At03	At_S0003	p6	ACACATACACATACACATACACATACACATACACATACACATACACATACACATACACATACACAT	471276	GOBAR_AA18193	467252	471933	-	GO:0003677|GO:0003899|GO:0005634|GO:0006351|	DNA binding|DNA-directed RNA polymerase activity|nucleus|transcription, DNA-templated|	ko00230|ko00240|ko03020|	Purine metabolism |Pyrimidine metabolism |RNA polymerase |	K03005	-	-	-	-
At03	At_S0003	p6	GTGTATGTGTATGTGTATGTGTATGTGTAT	473870	GOBAR_AA18194	473076	476421	+	GO:0006511|GO:0036459|GO:0016579|GO:0036459|	ubiquitin-dependent protein catabolic process|thiol-dependent ubiquitinyl hydrolase activity|protein deubiquitination|thiol-dependent ubiquitinyl hydrolase activity|	-	-	K12493	-	At_S0003_473870_1;At_S0003_473870_2;At_S0003_473870_3;	-	-
At03	At_S0003	p6	TATGTGTATGTGTATGTG	474183	GOBAR_AA18194	473076	476421	+	GO:0006511|GO:0036459|GO:0016579|GO:0036459|	ubiquitin-dependent protein catabolic process|thiol-dependent ubiquitinyl hydrolase activity|protein deubiquitination|thiol-dependent ubiquitinyl hydrolase activity|	-	-	K12493	-	-	-	At_S0003_474183_1;At_S0003_474183_2;At_S0003_474183_3;
At03	At_S0003	p2	ACACACACACACACACACACAC	709710	GOBAR_AA36203	709238	712671	+	GO:0005215|GO:0006810|GO:0016020|	transporter activity|transport|membrane|	-	-	-	-	At_S0003_709710_1;At_S0003_709710_2;At_S0003_709710_3;	-	-
At03	At_S0003	p3	GAAGAAGAAGAAGAAGAAGAAGAAGAA	913888	GOBAR_AA20784	913298	914099	-	-	-	-	-	-	-	At_S0003_913888_1;At_S0003_913888_2;At_S0003_913888_3;	-	-
At03	At_S0003	p4	GTATGTATGTATGTATGTATGTAT	1051897	GOBAR_AA39407	1050088	1056893	+	GO:0004252|GO:0006508|	serine-type endopeptidase activity|proteolysis|	-	-	-	-	-	At_S0003_1051897_1;At_S0003_1051897_2;At_S0003_1051897_3;	-
At03	At_S0003	p4	GTATGTATGTATGTATGTATGTAT	1053896	GOBAR_AA39407	1050088	1056893	+	GO:0004252|GO:0006508|	serine-type endopeptidase activity|proteolysis|	-	-	-	-	-	At_S0003_1053896_1;At_S0003_1053896_2;At_S0003_1053896_3;	-
At03	At_S0003	p4	TATGTATGTATGTATGTATGTATGTATGTATGTATGTATGTATGTATGTATG	1054046	GOBAR_AA39407	1050088	1056893	+	GO:0004252|GO:0006508|	serine-type endopeptidase activity|proteolysis|	-	-	-	-	-	-	At_S0003_1054046_1;At_S0003_1054046_2;At_S0003_1054046_3;
At03	At_S0003	p6	TGAAGGTGAAGGTGAAGG	1184427	GOBAR_AA33763	1184018	1186438	+	GO:0003735|GO:0005622|GO:0005840|GO:0006412|	structural constituent of ribosome|intracellular|ribosome|translation|	ko03010|	Ribosome |	-	At_S0003_1184427_1;At_S0003_1184427_2;At_S0003_1184427_3;	-	-	-
At03	At_S0003	p4	ATGTATGTATGTATGTATGTATGTATGT	1189460	GOBAR_AA33764	1189174	1191431	+	GO:0005789|	endoplasmic reticulum membrane|	-	-	-	-	At_S0003_1189460_2;At_S0003_1189460_3;	-	At_S0003_1189460_1;
At03	At_S0003	p4	ATGTATGTATGTATGTATGTATGTATGTATGTATGTATGTATGTATGT	1189607	GOBAR_AA33764	1189174	1191431	+	GO:0005789|	endoplasmic reticulum membrane|	-	-	-	-	At_S0003_1189607_1;At_S0003_1189607_2;	-	At_S0003_1189607_3;
At03	At_S0003	p4	GTATGTATGTATGTATGTATGTATGTATGTATGTATGTAT	1435432	GOBAR_AA07534	1432489	1436065	+	GO:0016787|	hydrolase activity|	-	-	-	At_S0003_1435432_1;At_S0003_1435432_2;At_S0003_1435432_3;	-	-	-
At03	At_S0003	p5	TAATTTAATTTAATTTAATTTAATT	1771975	GOBAR_AA30701	1765059	1773035	+	GO:0048208|	COPII vesicle coating|	-	-	-	-	-	At_S0003_1771975_1;At_S0003_1771975_2;At_S0003_1771975_3;	-
At03	At_S0003	p2	ATATATATATATATATATATATAT	1896958	GOBAR_AA26011	1895610	1899033	+	GO:0003824|GO:0005975|GO:0016616|GO:0055114|GO:0004459|GO:0005737|GO:0055114|GO:0004459|GO:0055114|GO:0016491|GO:0055114|GO:0016616|GO:0019752|GO:0055114|GO:0016616|GO:0055114|	catalytic activity|carbohydrate metabolic process|oxidoreductase activity, acting on the CH-OH group of donors, NAD or NADP as acceptor|oxidation-reduction process|L-lactate dehydrogenase activity|cytoplasm|oxidation-reduction process|L-lactate dehydrogenase activity|oxidation-reduction process|oxidoreductase activity|oxidation-reduction process|oxidoreductase activity, acting on the CH-OH group …	ko00010|ko00620|ko00640|ko00270|ko04922|	Glycolysis / Gluconeogenesis |Pyruvate metabolism |Propanoate metabolism |Cysteine and methionine metabolism |Glucagon signaling pathway |	K00016	At_S0003_1896958_1;At_S0003_1896958_2;At_S0003_1896958_3;	-	-	-
At03	At_S0003	p2	TGTGTGTGTGTGTGTGTGTG	2145632	GOBAR_AA37354	2143374	2146201	-	GO:0003824|GO:0005975|	catalytic activity|carbohydrate metabolic process|	ko01200|ko01230|ko00030|	Carbon metabolism |Biosynthesis of amino acids |Pentose phosphate pathway |	K00616	At_S0003_2145632_1;At_S0003_2145632_2;At_S0003_2145632_3;	-	-	-
At03	At_S0003	p6	CAGCATCAGCATCAGCATCAGCAT	2285525	GOBAR_AA13358	2285444	2288127	+	-	-	-	-	-	-	-	At_S0003_2285525_1;At_S0003_2285525_2;At_S0003_2285525_3;	-
At03	At_S0003	p6	CCAATCCCAATCCCAATC	2286436	GOBAR_AA13358	2285444	2288127	+	-	-	-	-	-	-	At_S0003_2286436_1;At_S0003_2286436_2;At_S0003_2286436_3;	-	-
At03	At_S0003	p6	CAGCATCAGCATCAGCATCAGCAT	2286707	GOBAR_AA13358	2285444	2288127	+	-	-	-	-	-	-	-	At_S0003_2286707_1;At_S0003_2286707_2;At_S0003_2286707_3;	-
At03	At_S0003	p3	TAATAATAATAATAATAATAA	2522103	GOBAR_AA11541	2520557	2526602	-	GO:0003700|GO:0005634|GO:0006355|	transcription factor activity, sequence-specific DNA binding|nucleus|regulation of transcription, DNA-templated|	-	-	-	-	At_S0003_2522103_1;At_S0003_2522103_2;At_S0003_2522103_3;	-	-
At03	At_S0003	p3	CCGCCGCCGCCGCCGCCGCCG	2696043	GOBAR_AA11526	2695792	2696322	-	GO:0003677|GO:0003700|GO:0006355|	DNA binding|transcription factor activity, sequence-specific DNA binding|regulation of transcription, DNA-templated|	-	-	-	At_S0003_2696043_2;At_S0003_2696043_3;	At_S0003_2696043_1;	-	-
At03	At_S0003	p3	AATAATAATAATAATAATAATAAT	3011444	GOBAR_AA29085	3006913	3014229	-	-	-	-	-	-	-	At_S0003_3011444_1;At_S0003_3011444_2;At_S0003_3011444_3;	-	-
At03	At_S0003	p4	CATACATACATACATACATACATA	3166143	GOBAR_AA13440	3164282	3166471	-	GO:0003677|	DNA binding|	-	-	K09422	-	At_S0003_3166143_1;At_S0003_3166143_2;At_S0003_3166143_3;	-	-
At03	At_S0003	p4	TTATTTATTTATTTATTTAT	3287662	GOBAR_AA13435	3286191	3289114	+	GO:0008152|GO:0016787|	metabolic process|hydrolase activity|	-	-	-	-	-	-	At_S0003_3287662_1;At_S0003_3287662_2;At_S0003_3287662_3;
At03	At_S0003	p4	ATTTATTTATTTATTTATTT	3303912	GOBAR_AA13434	3303480	3305876	+	GO:0003924|GO:0005200|GO:0005525|GO:0005874|GO:0007017|GO:0005525|GO:0005874|GO:0007017|GO:0005874|GO:0007017|	GTPase activity|structural constituent of cytoskeleton|GTP binding|microtubule|microtubule-based process|GTP binding|microtubule|microtubule-based process|microtubule|microtubule-based process|	ko04145|ko04540|ko05130|	Phagosome |Gap junction |Pathogenic Escherichia coli infection |	K07375	-	At_S0003_3303912_1;At_S0003_3303912_2;At_S0003_3303912_3;	-	-
At03	At_S0003	p6	TTATCATTATCATTATCA	3313631	GOBAR_AA13433	3310514	3313791	-	-	-	-	-	-	At_S0003_3313631_1;At_S0003_3313631_2;	At_S0003_3313631_3;	-	-
At03	At_S0003	p1	TTTTTTTTTTTTTTTTTTTTT	3470025	GOBAR_AA13953	3467507	3470641	+	GO:0008152|GO:0016491|	metabolic process|oxidoreductase activity|	-	-	-	At_S0003_3470025_1;At_S0003_3470025_2;At_S0003_3470025_3;	-	-	-
At03	At_S0003	p3	CACCACCACCACCACCACCAC	3770110	GOBAR_AA33961	3769769	3773095	+	GO:0003677|GO:0003677|GO:0006355|	DNA binding|DNA binding|regulation of transcription, DNA-templated|	-	-	-	-	At_S0003_3770110_1;At_S0003_3770110_2;At_S0003_3770110_3;	-	-
At03	At_S0003	p4	AATTAATTAATTAATTAATTAATTAATT	3999586	GOBAR_AA06601	3998243	4000660	-	-	-	-	-	-	-	-	-	-
At03	At_S0003	p6	GATAGGGATAGGGATAGG	4045864	GOBAR_AA06599	4045447	4046535	+	GO:0005515|GO:0008270|	protein binding|zinc ion binding|	-	-	-	At_S0003_4045864_1;At_S0003_4045864_2;At_S0003_4045864_3;	-	-	-
At03	At_S0003	p3	ATAATAATAATAATAATAATAATAATA	4102528	GOBAR_AA06593	4099675	4117770	-	GO:0004198|GO:0005622|GO:0006508|	calcium-dependent cysteine-type endopeptidase activity|intracellular|proteolysis|	-	-	-	-	At_S0003_4102528_1;At_S0003_4102528_2;At_S0003_4102528_3;	-	-
At03	At_S0003	p3	AGAAGAAGAAGAAGAAGA	4258576	GOBAR_AA12714	4258428	4258749	-	-	-	-	-	-	-	At_S0003_4258576_1;At_S0003_4258576_2;At_S0003_4258576_3;	-	-
At03	At_S0003	p5	GGGAAGGGAAGGGAAGGGAA	4283172	GOBAR_AA12717	4282811	4284077	-	-	-	-	-	-	-	At_S0003_4283172_1;At_S0003_4283172_2;At_S0003_4283172_3;	-	-
At03	At_S0003	p3	AACAACAACAACAACAACAACAAC	4317016	GOBAR_AA12719	4312954	4323601	-	GO:0003824|GO:0046872|GO:0004222|GO:0006508|GO:0046872|	catalytic activity|metal ion binding|metalloendopeptidase activity|proteolysis|metal ion binding|	-	-	K01411	-	At_S0003_4317016_1;At_S0003_4317016_2;At_S0003_4317016_3;	-	-
At03	At_S0003	p6	GTTTTTGTTTTTGTTTTT	4365131	GOBAR_AA12722	4364294	4366037	+	-	-	-	-	-	At_S0003_4365131_1;At_S0003_4365131_2;At_S0003_4365131_3;	-	-	-
At03	At_S0003	p6	GGAGAGGGAGAGGGAGAGGGAGAG	4371957	GOBAR_AA12723	4370607	4377873	-	GO:0004672|GO:0005524|GO:0006468|GO:0005515|GO:0005524|	protein kinase activity|ATP binding|protein phosphorylation|protein binding|ATP binding|	-	-	-	-	At_S0003_4371957_1;At_S0003_4371957_2;At_S0003_4371957_3;	-	-
At03	At_S0003	p6	CTCACACTCACACTCACACTCACACTCACA	4568490	GOBAR_AA16734	4567757	4568704	+	-	-	-	-	-	-	At_S0003_4568490_1;At_S0003_4568490_2;At_S0003_4568490_3;	-	-
At03	At_S0003	p2	ATATATATATATATATAT	4628286	GOBAR_AA16736	4627844	4630043	+	GO:0004601|GO:0006979|GO:0020037|GO:0055114|GO:0004601|GO:0055114|	peroxidase activity|response to oxidative stress|heme binding|oxidation-reduction process|peroxidase activity|oxidation-reduction process|	ko00940|	Phenylpropanoid biosynthesis |	K00430	At_S0003_4628286_1;At_S0003_4628286_2;At_S0003_4628286_3;	-	-	-
At03	At_S0003	p4	CATGCATGCATGCATGCATG	4639110	GOBAR_AA16737	4638675	4643128	+	GO:0004601|GO:0006979|GO:0020037|GO:0055114|GO:0004601|GO:0055114|	peroxidase activity|response to oxidative stress|heme binding|oxidation-reduction process|peroxidase activity|oxidation-reduction process|	ko00940|	Phenylpropanoid biosynthesis |	K00430	-	At_S0003_4639110_1;At_S0003_4639110_2;At_S0003_4639110_3;	-	-
At03	At_S0003	p6	CTCTTCCTCTTCCTCTTC	4765949	GOBAR_AA30169	4765721	4766359	-	-	-	-	-	K15113	At_S0003_4765949_1;	At_S0003_4765949_2;At_S0003_4765949_3;	-	-
At03	At_S0003	p3	TGATGATGATGATGATGA	4787381	GOBAR_AA30166	4784469	4787862	-	-	-	-	-	-	At_S0003_4787381_1;At_S0003_4787381_2;At_S0003_4787381_3;	-	-	-
At03	At_S0003	p2	ATATATATATATATATATATATATAT	5105583	GOBAR_AA30984	5105371	5107513	-	GO:0003824|GO:0004722|GO:0006470|GO:0043169|	catalytic activity|protein serine/threonine phosphatase activity|protein dephosphorylation|cation binding|	-	-	-	-	At_S0003_5105583_1;At_S0003_5105583_2;At_S0003_5105583_3;	-	-
At03	At_S0003	p3	GTGGTGGTGGTGGTGGTG	5232914	GOBAR_AA16305	5232832	5233598	-	-	-	-	-	-	-	At_S0003_5232914_1;At_S0003_5232914_2;At_S0003_5232914_3;	-	-
At03	At_S0003	p3	ACCACCACCACCACCACC	5392032	GOBAR_AA26824	5391831	5392826	-	GO:0030001|GO:0046872|	metal ion transport|metal ion binding|	-	-	-	-	At_S0003_5392032_1;At_S0003_5392032_2;At_S0003_5392032_3;	-	-
At03	At_S0003	p6	ATATACATATACATATAC	5770366	GOBAR_AA13982	5765779	5770861	+	-	-	-	-	-	-	-	At_S0003_5770366_1;At_S0003_5770366_2;At_S0003_5770366_3;	-
At03	At_S0003	p3	AACAACAACAACAACAAC	5879017	GOBAR_AA26582	5877310	5879596	+	GO:0003700|GO:0005634|	transcription factor activity, sequence-specific DNA binding|nucleus|	ko04075|	Plant hormone signal transduction |	K14514	At_S0003_5879017_1;At_S0003_5879017_2;At_S0003_5879017_3;	-	-	-
At03	At_S0003	p6	TAGGGTTAGGGTTAGGGT	6070676	GOBAR_AA28474	6070365	6070967	-	GO:0003676|GO:0046872|	nucleic acid binding|metal ion binding|	-	-	-	At_S0003_6070676_3;	At_S0003_6070676_1;At_S0003_6070676_2;	-	-
At03	At_S0003	p2	ATATATATATATATATAT	6097185	GOBAR_AA28473	6095806	6097829	-	GO:0005515|	protein binding|	-	-	-	At_S0003_6097185_1;At_S0003_6097185_2;At_S0003_6097185_3;	-	-	-
At03	At_S0003	p2	AGAGAGAGAGAGAGAGAGAGAG	6630379	GOBAR_AA12850	6621765	6630567	-	GO:0004672|GO:0005524|GO:0006468|GO:0004672|GO:0006468|GO:0005524|	protein kinase activity|ATP binding|protein phosphorylation|protein kinase activity|protein phosphorylation|ATP binding|	-	-	-	-	-	At_S0003_6630379_1;At_S0003_6630379_2;At_S0003_6630379_3;	-
At03	At_S0003	p2	GAGAGAGAGAGAGAGAGAGAGAGAGAGAGAGAGAGAGAGAGAGAGAGAGAGAGAGAGAGAGAGAGAGAGAGAGA	6793916	GOBAR_AA27785	6793088	6795575	-	-	-	-	-	-	-	-	-	-
At03	At_S0003	p2	GAGAGAGAGAGAGAGAGAGAGAGAGAGAGAGAGAGAGAGAGAGAGAGAGAGAGAGAGAGAGAGAGAGAGAGAGAGAGAGAGAGAGAGAGAGAGAGAGAGAGAGAGAGAGAGAGAGAGAGAGAGAGAGAGAGAGAGAGAGAGAGAGAGAGAGAGAGAGAGAGAGAGAGAGAGAGAGAGAGAGAGAGAGAGAGAGAGAGAGAGAGAGAGAGAGAGAGAGAGAGAGAGAGAGAGAGAGAGAGAGAGAGAGAGAGAGAGAGAGAGAGAGAGAGAGAGAGAGAGAGAGAGAGAGAGAGAGAGAGAGAGAGAGAGAGAGAGAGAGAGA	6794505	GOBAR_AA27785	6793088	6795575	-	-	-	-	-	-	-	-	-	-
At03	At_S0003	p3	GATGATGATGATGATGATGATGATGATGATGATGATGATGATGAT	6795058	GOBAR_AA27785	6793088	6795575	-	-	-	-	-	-	-	-	-	At_S0003_6795058_1;At_S0003_6795058_2;At_S0003_6795058_3;
At03	At_S0003	p3	TCATCATCATCATCATCA	7063923	GOBAR_AA02145	7057023	7068124	-	GO:0005634|GO:0042254|	nucleus|ribosome biogenesis|	ko03008|	Ribosome biogenesis in eukaryotes |	K14569	-	-	At_S0003_7063923_1;At_S0003_7063923_2;At_S0003_7063923_3;	-
At03	At_S0003	p3	AACAACAACAACAACAAC	7133613	GOBAR_AA02146	7131769	7133732	+	GO:0003677|GO:0006355|	DNA binding|regulation of transcription, DNA-templated|	-	-	-	-	At_S0003_7133613_1;At_S0003_7133613_2;At_S0003_7133613_3;	-	-
At03	At_S0003	p6	AAAAATAAAAATAAAAAT	7698262	GOBAR_AA27965	7697656	7699452	-	-	-	-	-	-	-	-	At_S0003_7698262_1;At_S0003_7698262_2;At_S0003_7698262_3;	-
At03	At_S0003	p1	AAAAAAAAAAAAAAAAAA	8425727	GOBAR_AA12922	8421376	8429914	+	-	-	-	-	-	-	At_S0003_8425727_1;At_S0003_8425727_2;At_S0003_8425727_3;	-	-
At03	At_S0003	p2	TATATATATATATATATA	8611920	GOBAR_AA26362	8611352	8612784	+	GO:0005515|	protein binding|	ko00480|ko00980|ko00982|ko05204|	Glutathione metabolism |Metabolism of xenobiotics by cytochrome P450 |Drug metabolism - cytochrome P450 |Chemical carcinogenesis |	K00799	At_S0003_8611920_1;At_S0003_8611920_2;At_S0003_8611920_3;	-	-	-
At03	At_S0003	p2	TGTGTGTGTGTGTGTGTG	9157409	GOBAR_AA30868	9154555	9165934	+	GO:0016021|GO:0055085|	integral component of membrane|transmembrane transport|	-	-	-	-	At_S0003_9157409_1;At_S0003_9157409_2;At_S0003_9157409_3;	-	-
At03	At_S0003	p3	AATAATAATAATAATAAT	9163139	GOBAR_AA30868	9154555	9165934	+	GO:0016021|GO:0055085|	integral component of membrane|transmembrane transport|	-	-	-	-	At_S0003_9163139_1;At_S0003_9163139_2;At_S0003_9163139_3;	-	-
At03	At_S0003	p6	CACGAGCACGAGCACGAGCACGAG	9285150	GOBAR_AA27348	9278780	9285615	-	-	-	-	-	-	-	At_S0003_9285150_1;At_S0003_9285150_2;At_S0003_9285150_3;	-	-
At03	At_S0003	p6	ATAAAAATAAAAATAAAAATAAAA	10130794	GOBAR_AA16321	10130489	10131980	+	GO:0005524|GO:0019538|	ATP binding|protein metabolic process|	-	-	-	At_S0003_10130794_3;	-	-	At_S0003_10130794_1;At_S0003_10130794_2;
At03	At_S0003	p3	GATGATGATGATGATGATGATGATGAT	10653500	GOBAR_AA07918	10650802	10653920	-	-	-	-	-	K09131	-	At_S0003_10653500_1;At_S0003_10653500_2;At_S0003_10653500_3;	-	-
At03	At_S0003	p6	TAGTCGTAGTCGTAGTCG	11020992	GOBAR_AA20792	11017772	11021016	-	GO:0000145|GO:0006887|	exocyst|exocytosis|	ko04910|	Insulin signaling pathway |	K07195	-	At_S0003_11020992_1;At_S0003_11020992_2;At_S0003_11020992_3;	-	-
At03	At_S0003	p2	AGAGAGAGAGAGAGAGAGAGAGAGAGAGAGAGAGAGAGAGAGAGAGAGAGAGAGAG	11105970	GOBAR_AA35254	11104266	11106431	-	GO:0005506|GO:0016705|GO:0020037|GO:0055114|	iron ion binding|oxidoreductase activity, acting on paired donors, with incorporation or reduction of molecular oxygen|heme binding|oxidation-reduction process|	-	-	-	At_S0003_11105970_1;At_S0003_11105970_2;At_S0003_11105970_3;	-	-	-
At03	At_S0003	p3	TTATTATTATTATTATTATTATTATTATTA	11267158	GOBAR_AA25837	11266831	11270477	+	GO:0004672|GO:0005524|GO:0006468|GO:0004672|GO:0006468|GO:0004674|GO:0004674|GO:0005524|	protein kinase activity|ATP binding|protein phosphorylation|protein kinase activity|protein phosphorylation|protein serine/threonine kinase activity|protein serine/threonine kinase activity|ATP binding|	ko03008|	Ribosome biogenesis in eukaryotes |	K07178	At_S0003_11267158_1;At_S0003_11267158_2;At_S0003_11267158_3;	-	-	-
At03	At_S0003	p3	CACCACCACCACCACCACCAC	11430818	GOBAR_AA14634	11429223	11440296	-	GO:0000166|GO:0004812|GO:0005524|GO:0006418|GO:0000166|GO:0004815|GO:0005524|GO:0005737|GO:0006422|GO:0004812|GO:0006418|	nucleotide binding|aminoacyl-tRNA ligase activity|ATP binding|tRNA aminoacylation for protein translation|nucleotide binding|aspartate-tRNA ligase activity|ATP binding|cytoplasm|aspartyl-tRNA aminoacylation|aminoacyl-tRNA ligase activity|tRNA aminoacylation for protein translation|	-	-	K01876	At_S0003_11430818_2;	At_S0003_11430818_3;	-	At_S0003_11430818_1;
At03	At_S0003	p5	ATGTTATGTTATGTTATGTT	11437831	GOBAR_AA14634	11429223	11440296	-	GO:0000166|GO:0004812|GO:0005524|GO:0006418|GO:0000166|GO:0004815|GO:0005524|GO:0005737|GO:0006422|GO:0004812|GO:0006418|	nucleotide binding|aminoacyl-tRNA ligase activity|ATP binding|tRNA aminoacylation for protein translation|nucleotide binding|aspartate-tRNA ligase activity|ATP binding|cytoplasm|aspartyl-tRNA aminoacylation|aminoacyl-tRNA ligase activity|tRNA aminoacylation for protein translation|	-	-	K01876	-	-	-	At_S0003_11437831_1;At_S0003_11437831_2;At_S0003_11437831_3;
At03	At_S0003	p3	AATAATAATAATAATAAT	11475510	GOBAR_AA14636	11474940	11476537	+	GO:0008152|GO:0016491|GO:0016491|	metabolic process|oxidoreductase activity|oxidoreductase activity|	-	-	-	At_S0003_11475510_1;At_S0003_11475510_2;At_S0003_11475510_3;	-	-	-
At03	At_S0003	p3	TTATTATTATTATTATTATTATTATTA	11514261	GOBAR_AA14642	11514157	11516511	+	GO:0001522|GO:0003723|GO:0009451|GO:0009982|GO:0003723|	pseudouridine synthesis|RNA binding|RNA modification|pseudouridine synthase activity|RNA binding|	-	-	-	-	At_S0003_11514261_1;At_S0003_11514261_2;At_S0003_11514261_3;	-	-
At03	At_S0003	p2	AGAGAGAGAGAGAGAGAGAGAGAGAG	11593687	GOBAR_AA14645	11592968	11620580	-	GO:0005515|	protein binding|	-	-	K14829	-	At_S0003_11593687_1;At_S0003_11593687_2;At_S0003_11593687_3;	-	-
At03	At_S0003	p2	ATATATATATATATATATATATATATATAT	11630296	GOBAR_AA01573	11630161	11631107	-	GO:0004672|GO:0005524|GO:0006468|GO:0004672|GO:0006468|GO:0005524|	protein kinase activity|ATP binding|protein phosphorylation|protein kinase activity|protein phosphorylation|ATP binding|	-	-	-	-	-	At_S0003_11630296_1;At_S0003_11630296_2;At_S0003_11630296_3;	-
At03	At_S0003	p2	ATATATATATATATATAT	11721171	GOBAR_AA01568	11716536	11723266	+	GO:0004601|GO:0050664|GO:0055114|GO:0005509|GO:0016020|GO:0016491|GO:0055114|GO:0016491|GO:0055114|	peroxidase activity|oxidoreductase activity, acting on NAD(P)H, oxygen as acceptor|oxidation-reduction process|calcium ion binding|membrane|oxidoreductase activity|oxidation-reduction process|oxidoreductase activity|oxidation-reduction process|	-	-	K13447	-	-	-	-
At03	At_S0003	p1	AAAAAAAAAAAAAAAAAA	12042000	GOBAR_AA01555	12040295	12049404	-	GO:0003824|GO:0005975|GO:0003824|GO:0005975|GO:0030246|GO:0004553|GO:0008270|GO:0004559|GO:0005975|GO:0006013|GO:0015923|	catalytic activity|carbohydrate metabolic process|catalytic activity|carbohydrate metabolic process|carbohydrate binding|hydrolase activity, hydrolyzing O-glycosyl compounds|zinc ion binding|alpha-mannosidase activity|carbohydrate metabolic process|mannose metabolic process|mannosidase activity|	ko00511|	Other glycan degradation |	K12311	-	At_S0003_12042000_1;At_S0003_12042000_2;At_S0003_12042000_3;	-	-
At03	At_S0003	p6	TAAAAATAAAAATAAAAA	12560607	GOBAR_AA11833	12556938	12565286	+	-	-	-	-	-	At_S0003_12560607_1;At_S0003_12560607_2;At_S0003_12560607_3;	-	-	-
At03	At_S0003	p6	GGAGGCGGAGGCGGAGGCGGAGGC	12625171	GOBAR_AA11836	12616131	12625691	-	GO:0005507|GO:0008131|GO:0009308|GO:0048038|GO:0055114|	copper ion binding|primary amine oxidase activity|amine metabolic process|quinone binding|oxidation-reduction process|	ko00260|ko00350|ko00360|ko00410|ko00950|ko00960|	Glycine, serine and threonine metabolism |Tyrosine metabolism |Phenylalanine metabolism |beta-Alanine metabolism |Isoquinoline alkaloid biosynthesis |Tropane, piperidine and pyridine alkaloid biosynthesis |	K00276	At_S0003_12625171_1;At_S0003_12625171_2;At_S0003_12625171_3;	-	-	-
At03	At_S0003	p2	TATATATATATATATATA	13302997	GOBAR_AA35312	13294270	13303967	+	-	-	-	-	-	-	At_S0003_13302997_1;At_S0003_13302997_2;At_S0003_13302997_3;	-	-
At03	At_S0003	p1	CCCCCCCCCCCCCCCCCCCC	14196578	GOBAR_AA05694	14194473	14197107	+	GO:0006520|GO:0016491|GO:0055114|GO:0016639|GO:0055114|	cellular amino acid metabolic process|oxidoreductase activity|oxidation-reduction process|oxidoreductase activity, acting on the CH-NH2 group of donors, NAD or NADP as acceptor|oxidation-reduction process|	ko01200|ko00910|ko00250|ko00220|ko00471|ko04964|	Carbon metabolism |Nitrogen metabolism |Alanine, aspartate and glutamate metabolism |Arginine biosynthesis |D-Glutamine and D-glutamate metabolism |Proximal tubule bicarbonate reclamation |	K00261	At_S0003_14196578_1;At_S0003_14196578_2;At_S0003_14196578_3;	-	-	-
At03	At_S0003	p6	AATACAAATACAAATACA	15929697	GOBAR_AA07964	15929379	15935611	-	-	-	-	-	-	-	At_S0003_15929697_1;At_S0003_15929697_2;At_S0003_15929697_3;	-	-
At03	At_S0003	p6	GGAGAAGGAGAAGGAGAA	16273315	GOBAR_AA34420	16272527	16273531	+	-	-	-	-	-	At_S0003_16273315_1;At_S0003_16273315_2;At_S0003_16273315_3;	-	-	-
At03	At_S0003	p3	TCTTCTTCTTCTTCTTCT	16325811	GOBAR_AA14903	16325442	16326737	+	-	-	-	-	-	At_S0003_16325811_1;	At_S0003_16325811_3;	At_S0003_16325811_2;	-
At03	At_S0003	p3	TTGTTGTTGTTGTTGTTG	17036319	GOBAR_AA19809	17025642	17039468	+	-	-	-	-	-	At_S0003_17036319_2;At_S0003_17036319_3;	At_S0003_17036319_1;	-	-
At03	At_S0003	p6	AAAAAGAAAAAGAAAAAG	17425189	GOBAR_AA11566	17424229	17426342	-	GO:0046983|	protein dimerization activity|	-	-	-	-	At_S0003_17425189_1;At_S0003_17425189_2;At_S0003_17425189_3;	-	-
At03	At_S0003	p6	AATCAAAATCAAAATCAA	17804935	GOBAR_AA24969	17804054	17807819	-	-	-	-	-	-	-	At_S0003_17804935_1;At_S0003_17804935_2;At_S0003_17804935_3;	-	-
At03	At_S0003	p2	AGAGAGAGAGAGAGAGAG	17892447	GOBAR_AA33517	17888719	17892828	-	GO:0015986|GO:0045261|GO:0046933|GO:0046961|	ATP synthesis coupled proton transport|proton-transporting ATP synthase complex, catalytic core F(1)|proton-transporting ATP synthase activity, rotational mechanism|proton-transporting ATPase activity, rotational mechanism|	ko00190|ko05010|ko05012|ko05016|	Oxidative phosphorylation |Alzheimer's disease |Parkinson's disease |Huntington's disease |	K02136	At_S0003_17892447_1;At_S0003_17892447_2;	At_S0003_17892447_3;	-	-
At03	At_S0003	p3	ATGATGATGATGATGATGATG	20740980	GOBAR_AA04915	20740015	20748515	-	GO:0003676|GO:0005524|	nucleic acid binding|ATP binding|	-	-	K13179	-	At_S0003_20740980_1;At_S0003_20740980_2;At_S0003_20740980_3;	-	-
At03	At_S0003	p6	TGATACTGATACTGATACTGATAC	20864948	GOBAR_AA04918	20855222	20869216	+	GO:0003723|GO:0006396|GO:0006397|	RNA binding|RNA processing|mRNA processing|	-	-	K13123	-	At_S0003_20864948_1;At_S0003_20864948_2;At_S0003_20864948_3;	-	-
At03	At_S0003	p2	AGAGAGAGAGAGAGAGAG	21287671	GOBAR_AA35302	21281616	21290678	-	GO:0004371|GO:0005524|GO:0006071|GO:0004371|GO:0006071|	glycerone kinase activity|ATP binding|glycerol metabolic process|glycerone kinase activity|glycerol metabolic process|	ko01200|ko00051|ko00680|ko00561|ko04622|	Carbon metabolism |Fructose and mannose metabolism |Methane metabolism |Glycerolipid metabolism |RIG-I-like receptor signaling pathway |	K00863	-	-	-	At_S0003_21287671_1;At_S0003_21287671_2;At_S0003_21287671_3;
At03	At_S0003	p2	AGAGAGAGAGAGAGAGAG	21288548	GOBAR_AA35302	21281616	21290678	-	GO:0004371|GO:0005524|GO:0006071|GO:0004371|GO:0006071|	glycerone kinase activity|ATP binding|glycerol metabolic process|glycerone kinase activity|glycerol metabolic process|	ko01200|ko00051|ko00680|ko00561|ko04622|	Carbon metabolism |Fructose and mannose metabolism |Methane metabolism |Glycerolipid metabolism |RIG-I-like receptor signaling pathway |	K00863	-	-	-	At_S0003_21288548_1;At_S0003_21288548_2;At_S0003_21288548_3;
At03	At_S0003	p2	TATATATATATATATATATA	21342041	GOBAR_AA35297	21331365	21343188	-	GO:0005216|GO:0006811|GO:0016020|GO:0055085|GO:0005515|	ion channel activity|ion transport|membrane|transmembrane transport|protein binding|	-	-	-	At_S0003_21342041_1;At_S0003_21342041_2;At_S0003_21342041_3;	-	-	-
At03	At_S0003	p6	TTTTTATTTTTATTTTTATTTTTA	22368160	GOBAR_AA11729	22367218	22369822	+	GO:0005515|	protein binding|	-	-	K03035	-	-	-	At_S0003_22368160_1;At_S0003_22368160_2;At_S0003_22368160_3;
At03	At_S0003	p1	AAAAAAAAAAAAAAAAAAAAA	22577999	GOBAR_AA14595	22572581	22579987	+	GO:0004672|GO:0005524|GO:0006468|GO:0004672|GO:0006468|GO:0005524|	protein kinase activity|ATP binding|protein phosphorylation|protein kinase activity|protein phosphorylation|ATP binding|	-	-	K08856	At_S0003_22577999_1;At_S0003_22577999_2;At_S0003_22577999_3;	-	-	-
At03	At_S0003	p1	AAAAAAAAAAAAAAAAAAAAAAAAAAAAAAAAAAAAAAAAAAAAAAAAAAAAAAAAAAAAAAAAAAAAAAAAAAAAAAAAAAAAAA	22579155	GOBAR_AA14595	22572581	22579987	+	GO:0004672|GO:0005524|GO:0006468|GO:0004672|GO:0006468|GO:0005524|	protein kinase activity|ATP binding|protein phosphorylation|protein kinase activity|protein phosphorylation|ATP binding|	-	-	K08856	-	-	-	-
At03	At_S0003	p2	TATATATATATATATATA	23425410	GOBAR_AA03640	23424697	23428824	+	-	-	-	-	K10734	-	-	-	At_S0003_23425410_1;At_S0003_23425410_2;At_S0003_23425410_3;
At03	At_S0003	p6	AAAATAAAAATAAAAATA	23489873	GOBAR_AA03641	23489475	23491179	+	GO:0003677|GO:0003677|GO:0003917|GO:0005694|GO:0006265|GO:0003677|GO:0003917|GO:0006265|GO:0003677|GO:0003918|GO:0006265|GO:0003917|	DNA binding|DNA binding|DNA topoisomerase type I activity|chromosome|DNA topological change|DNA binding|DNA topoisomerase type I activity|DNA topological change|DNA binding|DNA topoisomerase type II (ATP-hydrolyzing) activity|DNA topological change|DNA topoisomerase type I activity|	-	-	K03163	-	-	-	At_S0003_23489873_1;At_S0003_23489873_2;At_S0003_23489873_3;
At03	At_S0003	p6	AAAAATAAAAATAAAAATAAAAATAAAAATAAAAATAAAAATAAAAATAAAAATAAAAATAAAAATAAAAATAAAAATAAAAATAAAAAT	24895580	GOBAR_AA12571	24888666	24904137	-	GO:0003676|GO:0015074|	nucleic acid binding|DNA integration|	-	-	-	At_S0003_24895580_2;	-	-	At_S0003_24895580_1;At_S0003_24895580_3;
At03	At_S0003	p6	TTTATTTTTATTTTTATT	24895979	GOBAR_AA12571	24888666	24904137	-	GO:0003676|GO:0015074|	nucleic acid binding|DNA integration|	-	-	-	-	-	-	At_S0003_24895979_1;At_S0003_24895979_2;At_S0003_24895979_3;
At03	At_S0003	p3	AAGAAGAAGAAGAAGAAGAAGAAGAAGAAGAAG	30057262	GOBAR_AA26695	30056537	30057985	-	GO:0003677|	DNA binding|	-	-	-	At_S0003_30057262_1;At_S0003_30057262_2;At_S0003_30057262_3;	-	-	-
At03	At_S0003	p2	GTGTGTGTGTGTGTGTGT	30168840	GOBAR_AA31254	30166646	30169615	+	GO:0005737|	cytoplasm|	-	-	K06287	-	At_S0003_30168840_1;At_S0003_30168840_2;At_S0003_30168840_3;	-	-
At03	At_S0003	p3	ATAATAATAATAATAATAATAATAATAATAATAATAATAATAATAATAATA	32387503	GOBAR_AA16049	32385975	32391329	+	-	-	-	-	-	-	At_S0003_32387503_2;At_S0003_32387503_3;	At_S0003_32387503_1;	-
At03	At_S0003	p4	CCCTCCCTCCCTCCCTCCCT	34596297	GOBAR_AA16342	34594849	34597071	+	GO:0004616|GO:0055114|GO:0008442|GO:0051287|GO:0055114|GO:0016491|GO:0055114|GO:0051287|GO:0055114|	phosphogluconate dehydrogenase (decarboxylating) activity|oxidation-reduction process|3-hydroxyisobutyrate dehydrogenase activity|NAD binding|oxidation-reduction process|oxidoreductase activity|oxidation-reduction process|NAD binding|oxidation-reduction process|	ko00280|	Valine, leucine and isoleucine degradation |	K00020	-	At_S0003_34596297_1;At_S0003_34596297_2;At_S0003_34596297_3;	-	-
At03	At_S0003	p6	AATATTAATATTAATATT	35254593	GOBAR_AA17973	35249089	35255818	-	GO:0005515|GO:0005515|GO:0008270|GO:0006355|GO:0042393|	protein binding|protein binding|zinc ion binding|regulation of transcription, DNA-templated|histone binding|	-	-	-	At_S0003_35254593_1;At_S0003_35254593_2;At_S0003_35254593_3;	-	-	-
At03	At_S0003	p1	TTTTTTTTTTTTTTTTTTT	35611811	GOBAR_AA04625	35607745	35625161	-	GO:0005488|	binding|	-	-	-	-	-	-	-
At03	At_S0003	p2	TCTCTCTCTCTCTCTCTCTCTC	35624631	GOBAR_AA04625	35607745	35625161	-	GO:0005488|	binding|	-	-	-	At_S0003_35624631_1;At_S0003_35624631_2;At_S0003_35624631_3;	-	-	-
At03	At_S0003	p6	TTAAAATTAAAATTAAAA	37367127	GOBAR_AA01905	37362463	37367289	+	-	-	-	-	-	At_S0003_37367127_1;At_S0003_37367127_2;At_S0003_37367127_3;	-	-	-
At03	At_S0003	p6	TTTTCTTTTTCTTTTTCT	38097644	GOBAR_AA28076	38097456	38102154	+	-	-	-	-	-	-	At_S0003_38097644_1;At_S0003_38097644_2;	At_S0003_38097644_3;	-
At03	At_S0003	p2	AGAGAGAGAGAGAGAGAGAGAGAGAGAGAGAGAGAGAGAGAGAGAGAG	38239493	GOBAR_AA20839	38239138	38242667	-	GO:0004672|GO:0005524|GO:0006468|GO:0004672|GO:0006468|GO:0004707|GO:0005524|GO:0006468|GO:0005524|	protein kinase activity|ATP binding|protein phosphorylation|protein kinase activity|protein phosphorylation|MAP kinase activity|ATP binding|protein phosphorylation|ATP binding|	ko04075|	Plant hormone signal transduction |	K14512	-	At_S0003_38239493_1;At_S0003_38239493_2;At_S0003_38239493_3;	-	-
At03	At_S0003	p2	CTCTCTCTCTCTCTCTCTCTCTCTCT	40598886	GOBAR_AA36728	40594319	40611934	+	-	-	-	-	-	At_S0003_40598886_1;At_S0003_40598886_2;At_S0003_40598886_3;	-	-	-
At03	At_S0003	p3	GAAGAAGAAGAAGAAGAAGAAGAAGAA	40870664	GOBAR_AA24666	40870376	40898648	+	GO:0005515|	protein binding|	-	-	-	-	At_S0003_40870664_1;At_S0003_40870664_2;At_S0003_40870664_3;	-	-
At03	At_S0003	p3	AATAATAATAATAATAATAAT	41043823	GOBAR_AA18061	41042592	41044300	+	-	-	-	-	K09313	At_S0003_41043823_3;	At_S0003_41043823_1;At_S0003_41043823_2;	-	-
At03	At_S0003	p2	TCTCTCTCTCTCTCTCTCTCTCTC	42525797	GOBAR_AA03679	42518091	42527684	-	GO:0005524|GO:0006457|GO:0009408|GO:0051082|GO:0006457|GO:0051082|GO:0031072|GO:0051082|	ATP binding|protein folding|response to heat|unfolded protein binding|protein folding|unfolded protein binding|heat shock protein binding|unfolded protein binding|	-	-	-	At_S0003_42525797_2;At_S0003_42525797_3;	At_S0003_42525797_1;	-	-
At03	At_S0003	p6	CCCATTCCCATTCCCATT	43051070	GOBAR_AA25302	43049504	43052047	-	GO:0004672|GO:0005524|GO:0006468|GO:0005524|	protein kinase activity|ATP binding|protein phosphorylation|ATP binding|	-	-	-	-	At_S0003_43051070_1;At_S0003_43051070_2;At_S0003_43051070_3;	-	-
At03	At_S0003	p6	TTTAGTTTTAGTTTTAGT	43267115	GOBAR_AA29307	43264484	43270593	-	GO:0005515|GO:0009055|GO:0015035|GO:0045454|GO:0009055|GO:0045454|	protein binding|electron carrier activity|protein disulfide oxidoreductase activity|cell redox homeostasis|electron carrier activity|cell redox homeostasis|	ko00590|	Arachidonic acid metabolism |	K05309	At_S0003_43267115_1;At_S0003_43267115_2;At_S0003_43267115_3;	-	-	-
At03	At_S0003	p5	TTACATTACATTACATTACA	46721736	GOBAR_AA21940	46721600	46721994	+	GO:0003735|GO:0005840|GO:0006412|	structural constituent of ribosome|ribosome|translation|	-	-	K02955	-	-	-	At_S0003_46721736_1;At_S0003_46721736_2;At_S0003_46721736_3;
At03	At_S0003	p2	ATATATATATATATATAT	46731555	GOBAR_AA21939	46728188	46733424	+	GO:0005515|	protein binding|	-	-	-	At_S0003_46731555_1;At_S0003_46731555_2;At_S0003_46731555_3;	-	-	-
At03	At_S0003	p2	ATATATATATATATATATATAT	47095714	GOBAR_AA07521	47095369	47097879	-	GO:0004190|GO:0016021|	aspartic-type endopeptidase activity|integral component of membrane|	-	-	K09597	-	At_S0003_47095714_1;At_S0003_47095714_2;At_S0003_47095714_3;	-	-
At03	At_S0003	p2	ATATATATATATATATAT	48217513	GOBAR_AA11559	48217134	48217984	-	-	-	-	-	-	-	At_S0003_48217513_1;At_S0003_48217513_2;At_S0003_48217513_3;	-	-
At03	At_S0003	p6	TGTTTTTGTTTTTGTTTT	48217871	GOBAR_AA11559	48217134	48217984	-	-	-	-	-	-	At_S0003_48217871_1;At_S0003_48217871_2;At_S0003_48217871_3;	-	-	-
At03	At_S0003	p4	GTTTGTTTGTTTGTTTGTTTGTTTGTTT	48223881	GOBAR_AA11560	48222937	48227662	-	GO:0004222|GO:0006508|GO:0008237|	metalloendopeptidase activity|proteolysis|metallopeptidase activity|	-	-	K01414	-	At_S0003_48223881_1;At_S0003_48223881_2;At_S0003_48223881_3;	-	-
At03	At_S0003	p6	TTTTTATTTTTATTTTTA	50046579	GOBAR_AA17843	50043207	50052897	+	GO:0003676|GO:0008270|GO:0016818|GO:0016788|	nucleic acid binding|zinc ion binding|hydrolase activity, acting on acid anhydrides, in phosphorus-containing anhydrides|hydrolase activity, acting on ester bonds|	ko03460|	Fanconi anemia pathway |	K15363	-	At_S0003_50046579_1;At_S0003_50046579_2;At_S0003_50046579_3;	-	-
At03	At_S0003	p2	ATATATATATATATATATATATATAT	54647164	GOBAR_AA07625	54643457	54648851	-	GO:0005887|GO:0008515|GO:0015770|	integral component of plasma membrane|sucrose transmembrane transporter activity|sucrose transport|	-	-	K15378	-	At_S0003_54647164_1;At_S0003_54647164_2;At_S0003_54647164_3;	-	-
At03	At_S0003	p2	GAGAGAGAGAGAGAGAGA	54647523	GOBAR_AA07625	54643457	54648851	-	GO:0005887|GO:0008515|GO:0015770|	integral component of plasma membrane|sucrose transmembrane transporter activity|sucrose transport|	-	-	K15378	At_S0003_54647523_1;At_S0003_54647523_2;At_S0003_54647523_3;	-	-	-
At03	At_S0003	p6	TTATTTTTATTTTTATTT	56318131	GOBAR_AA06254	56315998	56321404	-	GO:0005215|GO:0006810|GO:0016020|	transporter activity|transport|membrane|	-	-	-	-	At_S0003_56318131_1;At_S0003_56318131_2;At_S0003_56318131_3;	-	-
At03	At_S0003	p5	AAAATAAAATAAAATAAAATAAAAT	56319742	GOBAR_AA06254	56315998	56321404	-	GO:0005215|GO:0006810|GO:0016020|	transporter activity|transport|membrane|	-	-	-	At_S0003_56319742_1;At_S0003_56319742_2;At_S0003_56319742_3;	-	-	-
At03	At_S0003	p6	AAAATAAAAATAAAAATA	56565859	GOBAR_AA23541	56565159	56566518	-	GO:0003677|GO:0006355|	DNA binding|regulation of transcription, DNA-templated|	-	-	-	-	At_S0003_56565859_1;At_S0003_56565859_2;At_S0003_56565859_3;	-	-
At03	At_S0003	p2	CACACACACACACACACACACACACA	57817826	GOBAR_AA29091	57817695	57821935	+	GO:0000413|GO:0003755|GO:0006457|GO:0003755|GO:0006457|	protein peptidyl-prolyl isomerization|peptidyl-prolyl cis-trans isomerase activity|protein folding|peptidyl-prolyl cis-trans isomerase activity|protein folding|	-	-	-	At_S0003_57817826_1;At_S0003_57817826_2;At_S0003_57817826_3;	-	-	-
At03	At_S0003	p1	TTTTTTTTTTTTTTTTTTTTTTTTTTT	59841552	GOBAR_AA30252	59841216	59841706	+	GO:0016021|GO:0055085|	integral component of membrane|transmembrane transport|	-	-	K13947	At_S0003_59841552_1;At_S0003_59841552_2;At_S0003_59841552_3;	-	-	-
At03	At_S0003	p6	TCATACTCATACTCATAC	61975386	GOBAR_AA04507	61974591	61978014	+	-	-	-	-	-	At_S0003_61975386_1;At_S0003_61975386_3;	At_S0003_61975386_2;	-	-
At03	At_S0003	p6	TCATACTCATACTCATAC	61976667	GOBAR_AA04507	61974591	61978014	+	-	-	-	-	-	-	-	-	-
At03	At_S0003	p3	AGTAGTAGTAGTAGTAGTAGTAGTAGTAGT	61990911	GOBAR_AA04508	61990011	61990998	+	GO:0003723|GO:0003746|GO:0006452|GO:0043022|GO:0045901|GO:0045905|GO:0003723|GO:0003746|GO:0043022|GO:0045901|GO:0045905|	RNA binding|translation elongation factor activity|translational frameshifting|ribosome binding|positive regulation of translational elongation|positive regulation of translational termination|RNA binding|translation elongation factor activity|ribosome binding|positive regulation of translational elongation|positive regulation of translational termination|	-	-	K03263	-	At_S0003_61990911_1;At_S0003_61990911_2;At_S0003_61990911_3;	-	-
At03	At_S0003	p3	TGATGATGATGATGATGATGATGATGATGA	62364538	GOBAR_AA11596	62362227	62366305	+	-	-	-	-	-	-	At_S0003_62364538_1;At_S0003_62364538_2;At_S0003_62364538_3;	-	-
At03	At_S0003	p2	TCTCTCTCTCTCTCTCTCTCTCTCTC	66385703	GOBAR_AA36709	66380608	66388367	+	GO:0008152|	metabolic process|	ko01200|ko01210|ko01230|ko00020|ko00630|ko00720|	Carbon metabolism |2-Oxocarboxylic acid metabolism |Biosynthesis of amino acids |Citrate cycle (TCA cycle) |Glyoxylate and dicarboxylate metabolism |Carbon fixation pathways in prokaryotes |	K01681	At_S0003_66385703_1;At_S0003_66385703_2;At_S0003_66385703_3;	-	-	-
At03	At_S0003	p6	ATATGTATATGTATATGTATATGT	66653371	GOBAR_AA31558	66650760	66654117	+	GO:0006855|GO:0015238|GO:0015297|GO:0016020|GO:0055085|	drug transmembrane transport|drug transmembrane transporter activity|antiporter activity|membrane|transmembrane transport|	-	-	K03327	-	At_S0003_66653371_1;At_S0003_66653371_2;At_S0003_66653371_3;	-	-
At03	At_S0003	p3	CAACAACAACAACAACAACAA	67760860	GOBAR_AA24889	67756049	67763025	-	GO:0005096|	GTPase activator activity|	ko04144|	Endocytosis |	K12489	At_S0003_67760860_2;At_S0003_67760860_3;	At_S0003_67760860_1;	-	-
At03	At_S0003	p3	TTATTATTATTATTATTATTATTATTATTATTATTATTATTATTATTATTATTATTA	67777986	GOBAR_AA24890	67773678	67779474	-	-	-	-	-	K12489	At_S0003_67777986_1;At_S0003_67777986_2;At_S0003_67777986_3;	-	-	-
At03	At_S0003	p3	ATTATTATTATTATTATTATTATTATTATTATTATTATTATT	68160187	GOBAR_AA13108	68154861	68161636	-	-	-	-	-	-	At_S0003_68160187_1;At_S0003_68160187_2;At_S0003_68160187_3;	-	-	-
At03	At_S0003	p2	GAGAGAGAGAGAGAGAGAGAGAGAGAGAGAGAGAGAGAGAGAGAGAGAGAGAGAGAGA	69191387	GOBAR_AA09657	69188645	69194905	-	GO:0008152|	metabolic process|	ko01230|ko00400|	Biosynthesis of amino acids |Phenylalanine, tyrosine and tryptophan biosynthesis |	K01658	At_S0003_69191387_1;At_S0003_69191387_2;At_S0003_69191387_3;	-	-	-
At03	At_S0003	p6	GCGGGCGCGGGCGCGGGC	70055436	GOBAR_AA08120	70052248	70056112	+	-	-	-	-	-	At_S0003_70055436_1;At_S0003_70055436_2;At_S0003_70055436_3;	-	-	-
At03	At_S0003	p2	CACACACACACACACACACACACACA	70676021	GOBAR_AA02119	70670943	70693745	-	GO:0006812|GO:0015299|GO:0016021|GO:0006812|GO:0015299|GO:0016021|GO:0055085|	cation transport|solute:proton antiporter activity|integral component of membrane|cation transport|solute:proton antiporter activity|integral component of membrane|transmembrane transport|	-	-	-	At_S0003_70676021_1;At_S0003_70676021_2;At_S0003_70676021_3;	-	-	-
At03	At_S0003	p6	TTGGGTTTGGGTTTGGGT	72173086	GOBAR_AA24472	72169330	72173261	-	GO:0016491|GO:0055114|	oxidoreductase activity|oxidation-reduction process|	-	-	-	At_S0003_72173086_1;At_S0003_72173086_2;At_S0003_72173086_3;	-	-	-
At03	At_S0003	p3	TTATTATTATTATTATTATTA	72351385	GOBAR_AA33430	72350097	72351659	-	-	-	-	-	-	-	At_S0003_72351385_1;At_S0003_72351385_2;At_S0003_72351385_3;	-	-
At03	At_S0003	p1	AAAAAAAAAAAAAAAAAAAA	73321377	GOBAR_AA13586	73309426	73323133	+	GO:0005643|GO:0006913|GO:0017056|	nuclear pore|nucleocytoplasmic transport|structural constituent of nuclear pore|	ko03013|	RNA transport |	K14312	At_S0003_73321377_1;At_S0003_73321377_2;At_S0003_73321377_3;	-	-	-
At03	At_S0003	p3	GAAGAAGAAGAAGAAGAAGAAGAAGAA	73324566	GOBAR_AA13587	73323737	73326481	-	GO:0005515|GO:0008270|	protein binding|zinc ion binding|	-	-	K13148	At_S0003_73324566_1;At_S0003_73324566_2;At_S0003_73324566_3;	-	-	-
At03	At_S0003	p2	AGAGAGAGAGAGAGAGAGAGAGAGAGAGAGAGAGAGAGAGAGAGAGAGAGAG	75169596	GOBAR_AA36228	75168209	75172801	-	GO:0003676|GO:0046872|	nucleic acid binding|metal ion binding|	-	-	-	-	-	-	-
At03	At_S0003	p2	AGAGAGAGAGAGAGAGAGAGAGAGAGAGAGAGAGAGAGAGAGAGAGAGAGAGAG	75171655	GOBAR_AA36228	75168209	75172801	-	GO:0003676|GO:0046872|	nucleic acid binding|metal ion binding|	-	-	-	-	-	-	-
At03	At_S0003	p3	AATAATAATAATAATAAT	76149672	GOBAR_AA03706	76148799	76154431	+	GO:0005515|	protein binding|	-	-	-	-	-	At_S0003_76149672_1;At_S0003_76149672_2;At_S0003_76149672_3;	-
At03	At_S0003	p3	AATAATAATAATAATAAT	76151367	GOBAR_AA03706	76148799	76154431	+	GO:0005515|	protein binding|	-	-	-	-	-	At_S0003_76151367_1;At_S0003_76151367_2;At_S0003_76151367_3;	-
At03	At_S0003	p6	ATTTTTATTTTTATTTTT	76151733	GOBAR_AA03706	76148799	76154431	+	GO:0005515|	protein binding|	-	-	-	-	-	-	At_S0003_76151733_1;At_S0003_76151733_2;At_S0003_76151733_3;
At03	At_S0003	p5	TCGAATCGAATCGAATCGAA	76154147	GOBAR_AA03706	76148799	76154431	+	GO:0005515|	protein binding|	-	-	-	At_S0003_76154147_1;At_S0003_76154147_2;At_S0003_76154147_3;	-	-	-
At03	At_S0003	p2	CACACACACACACACACACACA	76234654	GOBAR_AA03705	76233815	76234764	-	-	-	-	-	-	At_S0003_76234654_1;At_S0003_76234654_2;At_S0003_76234654_3;	-	-	-
At03	At_S0003	p4	CATTCATTCATTCATTCATT	79184133	GOBAR_AA33619	79174960	79186438	+	-	-	-	-	K14416	-	-	-	At_S0003_79184133_1;At_S0003_79184133_2;At_S0003_79184133_3;
At03	At_S0003	p6	GGGGGAGGGGGAGGGGGA	79546234	GOBAR_AA31360	79545102	79556289	-	GO:0005543|GO:0005545|GO:0030136|GO:0030276|GO:0048268|	phospholipid binding|1-phosphatidylinositol binding|clathrin-coated vesicle|clathrin binding|clathrin coat assembly|	-	-	-	-	-	At_S0003_79546234_1;At_S0003_79546234_2;At_S0003_79546234_3;	-
At03	At_S0003	p6	TGTTTTTGTTTTTGTTTT	81089591	GOBAR_AA32668	81085141	81101710	+	GO:0005524|GO:0008152|GO:0016301|	ATP binding|metabolic process|kinase activity|	-	-	-	-	At_S0003_81089591_1;At_S0003_81089591_2;At_S0003_81089591_3;	-	-
At03	At_S0003	p1	TTTTTTTTTTTTTTTTTTTT	81100613	GOBAR_AA32668	81085141	81101710	+	GO:0005524|GO:0008152|GO:0016301|	ATP binding|metabolic process|kinase activity|	-	-	-	-	At_S0003_81100613_1;At_S0003_81100613_2;At_S0003_81100613_3;	-	-
At03	At_S0003	p4	TTTATTTATTTATTTATTTA	82093389	GOBAR_AA29971	82090691	82097195	+	-	-	-	-	-	At_S0003_82093389_1;At_S0003_82093389_2;At_S0003_82093389_3;	-	-	-
At03	At_S0003	p3	TCTTCTTCTTCTTCTTCTTCTTCT	83911861	GOBAR_AA13744	83911412	83913163	-	-	-	-	-	-	At_S0003_83911861_1;At_S0003_83911861_2;At_S0003_83911861_3;	-	-	-
At03	At_S0003	p3	AATAATAATAATAATAAT	83927629	GOBAR_AA13745	83926982	83929452	+	GO:0005507|GO:0005507|GO:0016491|GO:0055114|GO:0016491|GO:0055114|	copper ion binding|copper ion binding|oxidoreductase activity|oxidation-reduction process|oxidoreductase activity|oxidation-reduction process|	-	-	-	-	At_S0003_83927629_1;At_S0003_83927629_2;At_S0003_83927629_3;	-	-
At03	At_S0003	p4	TAGATAGATAGATAGATAGA	84415076	GOBAR_AA21137	84414055	84426891	+	GO:0016972|GO:0055114|GO:0045454|	thiol oxidase activity|oxidation-reduction process|cell redox homeostasis|	-	-	-	-	-	-	At_S0003_84415076_1;At_S0003_84415076_2;At_S0003_84415076_3;
At03	At_S0003	p6	TTAAAATTAAAATTAAAA	85941700	GOBAR_AA26689	85941483	85945712	-	-	-	-	-	-	-	-	-	At_S0003_85941700_1;At_S0003_85941700_2;At_S0003_85941700_3;
At03	At_S0003	p5	TAAAATAAAATAAAATAAAA	85943447	GOBAR_AA26689	85941483	85945712	-	-	-	-	-	-	At_S0003_85943447_1;At_S0003_85943447_2;At_S0003_85943447_3;	-	-	-
At03	At_S0003	p6	TCTTCCTCTTCCTCTTCC	86295099	GOBAR_AA22997	86295071	86300235	+	GO:0004672|GO:0005524|GO:0006468|GO:0004672|GO:0006468|GO:0005515|	protein kinase activity|ATP binding|protein phosphorylation|protein kinase activity|protein phosphorylation|protein binding|	-	-	-	-	At_S0003_86295099_1;At_S0003_86295099_2;At_S0003_86295099_3;	-	-
At03	At_S0003	p6	GAGAGGGAGAGGGAGAGG	87128603	GOBAR_AA23916	87123689	87134250	-	GO:0004222|GO:0006508|GO:0008237|	metalloendopeptidase activity|proteolysis|metallopeptidase activity|	ko04614|ko05143|	Renin-angiotensin system |African trypanosomiasis |	K01392	-	-	-	At_S0003_87128603_1;At_S0003_87128603_2;At_S0003_87128603_3;
At03	At_S0003	p6	GAGAGGGAGAGGGAGAGG	87129400	GOBAR_AA23916	87123689	87134250	-	GO:0004222|GO:0006508|GO:0008237|	metalloendopeptidase activity|proteolysis|metallopeptidase activity|	ko04614|ko05143|	Renin-angiotensin system |African trypanosomiasis |	K01392	-	-	-	At_S0003_87129400_1;At_S0003_87129400_2;At_S0003_87129400_3;
At03	At_S0003	p4	ATTTATTTATTTATTTATTT	90513946	GOBAR_AA15165	90512976	90515537	+	GO:0005315|GO:0006817|GO:0016020|	inorganic phosphate transmembrane transporter activity|phosphate ion transport|membrane|	-	-	K14640	-	At_S0003_90513946_1;At_S0003_90513946_3;	At_S0003_90513946_2;	-
At03	At_S0003	p2	ATATATATATATATATATAT	91361531	GOBAR_AA24005	91360024	91364894	+	GO:0006810|GO:0006886|GO:0016192|GO:0030131|	transport|intracellular protein transport|vesicle-mediated transport|clathrin adaptor complex|	ko04142|	Lysosome |	K12393	-	At_S0003_91361531_1;At_S0003_91361531_2;At_S0003_91361531_3;	-	-
At03	At_S0003	p3	TTCTTCTTCTTCTTCTTCTTCTTCTTC	91633004	GOBAR_AA07982	91629973	91633747	-	-	-	-	-	-	-	At_S0003_91633004_1;At_S0003_91633004_2;At_S0003_91633004_3;	-	-
At03	At_S0003	p6	TTTTTCTTTTTCTTTTTC	92047558	GOBAR_AA34298	92046444	92049867	+	GO:0008152|GO:0016491|GO:0016620|GO:0055114|GO:0008152|GO:0016491|GO:0055114|	metabolic process|oxidoreductase activity|oxidoreductase activity, acting on the aldehyde or oxo group of donors, NAD or NADP as acceptor|oxidation-reduction process|metabolic process|oxidoreductase activity|oxidation-reduction process|	ko00010|ko00040|ko00053|ko00620|ko00071|ko00561|ko00280|ko00310|ko00330|ko00340|ko00380|ko00410|ko00903|ko00625|	Glycolysis / Gluconeogenesis |Pentose and glucuronate interconversions |Ascorbate and aldarate metabolism |Pyruvate metabolism |Fatty acid degradation |Glycerolipid metabolism |Valine, leucine and isoleucine degradation |Lysine degradation |Arginine and proline metabolism |Histidine metabolism |Tryptophan metabolism |beta-Alanine metabolism |Limonene and pinene degradation |Chloroalkane and chlor…	K00128	-	At_S0003_92047558_1;At_S0003_92047558_2;At_S0003_92047558_3;	-	-
At03	At_S0003	p6	TATTTTTATTTTTATTTT	92156836	GOBAR_AA23628	92156746	92159022	+	GO:0000166|GO:0003676|GO:0003676|GO:0008270|	nucleotide binding|nucleic acid binding|nucleic acid binding|zinc ion binding|	ko03040|ko05168|	Spliceosome |Herpes simplex infection |	K12896	-	At_S0003_92156836_1;At_S0003_92156836_2;At_S0003_92156836_3;	-	-
At03	At_S0003	p5	AATAAAATAAAATAAAATAAAATAA	92173498	GOBAR_AA23630	92168468	92173899	-	GO:0003824|GO:0006595|	catalytic activity|polyamine metabolic process|	ko00270|ko00330|ko00410|ko00480|	Cysteine and methionine metabolism |Arginine and proline metabolism |beta-Alanine metabolism |Glutathione metabolism |	K00797	-	-	At_S0003_92173498_1;At_S0003_92173498_2;At_S0003_92173498_3;	-
At03	At_S0003	p3	CTTCTTCTTCTTCTTCTTCTTCTTCTT	92963435	GOBAR_AA11971	92962977	92964718	+	GO:0005794|GO:0010411|GO:0016413|	Golgi apparatus|xyloglucan metabolic process|O-acetyltransferase activity|	-	-	-	At_S0003_92963435_1;At_S0003_92963435_2;At_S0003_92963435_3;	-	-	-
At03	At_S0003	p3	TATTATTATTATTATTAT	92989562	GOBAR_AA11972	92988078	92991762	-	GO:0005515|	protein binding|	-	-	-	At_S0003_92989562_1;At_S0003_92989562_2;At_S0003_92989562_3;	-	-	-
At03	At_S0003	p4	ATTTATTTATTTATTTATTTATTT	93242185	GOBAR_AA01888	93241323	93246092	+	-	-	-	-	-	-	-	-	At_S0003_93242185_1;At_S0003_93242185_2;At_S0003_93242185_3;
At03	At_S0003	p6	GAAGATGAAGATGAAGAT	93871826	GOBAR_AA21864	93871623	93874933	+	-	-	ko00561|ko04923|ko04723|	Glycerolipid metabolism |Regulation of lipolysis in adipocyte |Retrograde endocannabinoid signaling |	-	-	At_S0003_93871826_1;At_S0003_93871826_2;At_S0003_93871826_3;	-	-
At03	At_S0003	p3	ACCACCACCACCACCACCACCACCACCACC	94021766	GOBAR_AA12388	94020588	94023078	-	GO:0003676|GO:0046872|	nucleic acid binding|metal ion binding|	-	-	-	-	-	At_S0003_94021766_1;At_S0003_94021766_2;At_S0003_94021766_3;	-
At03	At_S0003	p2	CTCTCTCTCTCTCTCTCTCT	94282082	GOBAR_AA14048	94281881	94283930	+	-	-	-	-	-	-	At_S0003_94282082_2;	At_S0003_94282082_1;At_S0003_94282082_3;	-
At03	At_S0003	p2	TCTCTCTCTCTCTCTCTCTCTCTCTCTCTCTC	94282867	GOBAR_AA14048	94281881	94283930	+	-	-	-	-	-	At_S0003_94282867_1;At_S0003_94282867_2;At_S0003_94282867_3;	-	-	-
At03	At_S0003	p4	TTTATTTATTTATTTATTTATTTA	94987593	GOBAR_AA10206	94986253	95000829	+	GO:0005515|	protein binding|	-	-	-	-	-	-	-
At03	At_S0003	p1	TTTTTTTTTTTTTTTTTTT	95224697	GOBAR_AA10214	95221652	95226575	+	-	-	-	-	-	-	-	At_S0003_95224697_1;At_S0003_95224697_2;At_S0003_95224697_3;	-
At03	At_S0003	p6	AAAATGAAAATGAAAATG	95534209	GOBAR_AA34789	95533788	95535458	-	-	-	-	-	-	-	-	-	At_S0003_95534209_1;At_S0003_95534209_2;At_S0003_95534209_3;
At03	At_S0003	p2	ATATATATATATATATAT	95534610	GOBAR_AA34789	95533788	95535458	-	-	-	-	-	-	-	-	-	At_S0003_95534610_1;At_S0003_95534610_2;At_S0003_95534610_3;
At03	At_S0003	p6	CTGTTGCTGTTGCTGTTG	95748087	GOBAR_AA16182	95725927	95748299	-	GO:0003676|GO:0005524|GO:0004386|	nucleic acid binding|ATP binding|helicase activity|	ko03018|	RNA degradation |	-	-	At_S0003_95748087_1;At_S0003_95748087_2;At_S0003_95748087_3;	-	-
At03	At_S0003	p3	CATCATCATCATCATCAT	96058715	GOBAR_AA20011	96058332	96065941	-	-	-	-	-	-	-	At_S0003_96058715_1;At_S0003_96058715_2;At_S0003_96058715_3;	-	-
At03	At_S0003	p3	CATCATCATCATCATCAT	96060155	GOBAR_AA20011	96058332	96065941	-	-	-	-	-	-	-	At_S0003_96060155_1;At_S0003_96060155_2;At_S0003_96060155_3;	-	-
At03	At_S0003	p3	GAGGAGGAGGAGGAGGAG	96209573	GOBAR_AA20009	96208701	96211618	-	-	-	-	-	-	-	At_S0003_96209573_1;At_S0003_96209573_2;At_S0003_96209573_3;	-	-
At03	At_S0003	p6	CTTTGACTTTGACTTTGA	96783843	GOBAR_AA13850	96783426	96783848	+	GO:0009055|GO:0015035|GO:0045454|	electron carrier activity|protein disulfide oxidoreductase activity|cell redox homeostasis|	-	-	-	At_S0003_96783843_3;	At_S0003_96783843_1;At_S0003_96783843_2;	-	-
At03	At_S0003	p6	CCAGCACCAGCACCAGCA	96846112	GOBAR_AA13854	96845965	96846729	+	-	-	-	-	-	-	At_S0003_96846112_1;At_S0003_96846112_2;At_S0003_96846112_3;	-	-
At03	At_S0003	p2	TATATATATATATATATATATATATA	96856920	GOBAR_AA13855	96856829	96861655	+	GO:0005515|	protein binding|	-	-	K11806	-	At_S0003_96856920_1;At_S0003_96856920_2;At_S0003_96856920_3;	-	-
At03	At_S0003	p5	TCACTTCACTTCACTTCACTTCACTTCACTTCACT	97040923	GOBAR_AA39310	97040294	97041850	+	GO:0004672|GO:0005524|GO:0006468|GO:0004672|GO:0006468|GO:0005524|	protein kinase activity|ATP binding|protein phosphorylation|protein kinase activity|protein phosphorylation|ATP binding|	-	-	-	-	At_S0003_97040923_1;At_S0003_97040923_2;At_S0003_97040923_3;	-	-
At03	At_S0003	p3	TCTTCTTCTTCTTCTTCTTCTTCTTCTTCTTCTTCTTCTTCTTCTTCT	97194196	GOBAR_AA25366	97193950	97195188	+	GO:0003677|GO:0003700|GO:0006355|	DNA binding|transcription factor activity, sequence-specific DNA binding|regulation of transcription, DNA-templated|	-	-	-	-	At_S0003_97194196_1;At_S0003_97194196_2;At_S0003_97194196_3;	-	-
At03	At_S0003	p6	TTCGATTTCGATTTCGAT	97203821	GOBAR_AA25367	97199047	97204819	-	GO:0000398|GO:0005515|GO:0006396|	mRNA splicing, via spliceosome|protein binding|RNA processing|	ko03040|	Spliceosome |	K12855	-	-	-	At_S0003_97203821_1;At_S0003_97203821_2;At_S0003_97203821_3;
At03	At_S0003	p6	ATTTTCATTTTCATTTTC	97204102	GOBAR_AA25367	97199047	97204819	-	GO:0000398|GO:0005515|GO:0006396|	mRNA splicing, via spliceosome|protein binding|RNA processing|	ko03040|	Spliceosome |	K12855	-	-	-	-
At03	At_S0003	p6	TTAAAATTAAAATTAAAA	97410996	GOBAR_AA18183	97409752	97414549	+	GO:0008168|GO:0008171|GO:0046983|	methyltransferase activity|O-methyltransferase activity|protein dimerization activity|	-	-	-	-	-	-	-
At03	At_S0003	p6	TTAAAATTAAAATTAAAA	97412055	GOBAR_AA18183	97409752	97414549	+	GO:0008168|GO:0008171|GO:0046983|	methyltransferase activity|O-methyltransferase activity|protein dimerization activity|	-	-	-	-	-	-	-
At03	At_S0003	p6	TTAAAATTAAAATTAAAA	97512717	GOBAR_AA18180	97510962	97514944	+	GO:0008168|GO:0008171|GO:0046983|	methyltransferase activity|O-methyltransferase activity|protein dimerization activity|	-	-	-	-	-	-	-
At03	At_S0003	p6	ATATTTATATTTATATTTATATTT	97691184	GOBAR_AA17913	97690798	97695182	-	GO:0005819|GO:0005874|GO:0032147|GO:0060236|	spindle|microtubule|activation of protein kinase activity|regulation of mitotic spindle organization|	-	-	-	-	At_S0003_97691184_1;At_S0003_97691184_2;At_S0003_97691184_3;	-	-
At03	At_S0003	p2	AGAGAGAGAGAGAGAGAGAG	97868779	GOBAR_AA22747	97866970	97868906	-	-	-	-	-	-	At_S0003_97868779_1;At_S0003_97868779_2;	-	-	At_S0003_97868779_3;
At03	At_S0003	p4	TATTTATTTATTTATTTATT	98279974	GOBAR_AA11421	98279844	98281219	+	-	-	-	-	-	-	-	At_S0003_98279974_1;At_S0003_98279974_2;At_S0003_98279974_3;	-
At03	At_S0003	p6	CTGAGCCTGAGCCTGAGC	98432281	GOBAR_AA09327	98432102	98432608	-	GO:0048544|	recognition of pollen|	-	-	-	At_S0003_98432281_1;At_S0003_98432281_2;At_S0003_98432281_3;	-	-	-
At03	At_S0003	p3	CAGCAGCAGCAGCAGCAGCAG	98829267	GOBAR_AA09790	98829030	98846982	+	GO:0005515|	protein binding|	-	-	-	At_S0003_98829267_1;At_S0003_98829267_2;At_S0003_98829267_3;	-	-	-
At03	At_S0003	p3	AGCAGCAGCAGCAGCAGCAGCAGC	98829395	GOBAR_AA09790	98829030	98846982	+	GO:0005515|	protein binding|	-	-	-	At_S0003_98829395_1;At_S0003_98829395_2;At_S0003_98829395_3;	-	-	-
At03	At_S0003	p6	AGAAAAAGAAAAAGAAAA	98866606	GOBAR_AA09793	98864767	98867495	-	GO:0000272|GO:0016161|GO:0005975|	polysaccharide catabolic process|beta-amylase activity|carbohydrate metabolic process|	-	-	-	-	At_S0003_98866606_1;At_S0003_98866606_2;At_S0003_98866606_3;	-	-
At03	At_S0003	p6	CAGCCGCAGCCGCAGCCG	98926597	GOBAR_AA18644	98925742	98927532	+	-	-	-	-	-	-	At_S0003_98926597_1;At_S0003_98926597_2;	-	At_S0003_98926597_3;
At03	At_S0003	p2	AGAGAGAGAGAGAGAGAG	99047518	GOBAR_AA18638	99039706	99049699	-	GO:0004672|GO:0005524|GO:0006468|GO:0004672|GO:0006468|GO:0005488|GO:0005515|GO:0005524|	protein kinase activity|ATP binding|protein phosphorylation|protein kinase activity|protein phosphorylation|binding|protein binding|ATP binding|	-	-	-	At_S0003_99047518_1;At_S0003_99047518_2;At_S0003_99047518_3;	-	-	-
At03	At_S0003	p3	GAAGAAGAAGAAGAAGAA	99208696	GOBAR_AA28594	99205202	99208860	-	-	-	-	-	-	At_S0003_99208696_1;At_S0003_99208696_2;At_S0003_99208696_3;	-	-	-
At03	At_S0003	p6	TTATTTTTATTTTTATTT	99639002	GOBAR_AA35274	99637357	99639928	+	-	-	-	-	-	At_S0003_99639002_1;At_S0003_99639002_2;At_S0003_99639002_3;	-	-	-
At03	At_S0003	p6	GCAAAAGCAAAAGCAAAA	100074655	GOBAR_AA21019	100074225	100075417	-	GO:0006869|GO:0008289|	lipid transport|lipid binding|	-	-	-	-	At_S0003_100074655_1;At_S0003_100074655_2;At_S0003_100074655_3;	-	-
At03	At_S0003	p5	AAAAGAAAAGAAAAGAAAAG	100088972	GOBAR_AA21020	100081103	100089240	-	GO:0003824|	catalytic activity|	-	-	-	-	At_S0003_100088972_1;At_S0003_100088972_2;At_S0003_100088972_3;	-	-
At03	At_S0003	p5	AAAAGAAAAGAAAAGAAAAG	100093404	GOBAR_AA21021	100092600	100094085	-	GO:0046983|	protein dimerization activity|	-	-	-	At_S0003_100093404_1;At_S0003_100093404_2;At_S0003_100093404_3;	-	-	-
At03	At_S0003	p3	TCTTCTTCTTCTTCTTCTTCT	100516411	GOBAR_AA29256	100516304	100517572	-	-	-	-	-	-	-	At_S0003_100516411_1;At_S0003_100516411_2;At_S0003_100516411_3;	-	-
At03	At_S0003	p3	TTATTATTATTATTATTATTATTA	100584543	GOBAR_AA34473	100584277	100585385	+	-	-	-	-	-	-	-	-	At_S0003_100584543_1;At_S0003_100584543_2;At_S0003_100584543_3;
At03	At_S0003	p3	ATTATTATTATTATTATTATTATT	100584941	GOBAR_AA34473	100584277	100585385	+	-	-	-	-	-	-	-	-	At_S0003_100584941_1;At_S0003_100584941_2;At_S0003_100584941_3;
At03	At_S0003	p6	TTATTTTTATTTTTATTT	100705067	GOBAR_AA29985	100695397	100707458	+	GO:0004491|GO:0055114|GO:0008152|GO:0016491|GO:0016620|GO:0055114|GO:0008152|GO:0016491|GO:0055114|	methylmalonate-semialdehyde dehydrogenase (acylating) activity|oxidation-reduction process|metabolic process|oxidoreductase activity|oxidoreductase activity, acting on the aldehyde or oxo group of donors, NAD or NADP as acceptor|oxidation-reduction process|metabolic process|oxidoreductase activity|oxidation-reduction process|	ko01200|ko00640|ko00562|ko00280|ko00410|	Carbon metabolism |Propanoate metabolism |Inositol phosphate metabolism |Valine, leucine and isoleucine degradation |beta-Alanine metabolism |	K00140	At_S0003_100705067_2;	At_S0003_100705067_1;At_S0003_100705067_3;	-	-
At03	At_S0003	p1	TTTTTTTTTTTTTTTTTTTTTT	100766695	GOBAR_AA29992	100763565	100771093	-	GO:0005515|GO:0008289|	protein binding|lipid binding|	-	-	-	At_S0003_100766695_1;At_S0003_100766695_2;At_S0003_100766695_3;	-	-	-
At03	At_S0003	p2	ATATATATATATATATAT	100973664	GOBAR_AA09278	100965852	100976481	+	GO:0005488|GO:0016773|GO:0046854|GO:0048015|	binding|phosphotransferase activity, alcohol group as acceptor|phosphatidylinositol phosphorylation|phosphatidylinositol-mediated signaling|	ko00562|ko04011|ko04070|	Inositol phosphate metabolism |MAPK signaling pathway - yeast |Phosphatidylinositol signaling system |	K00888	-	At_S0003_100973664_1;At_S0003_100973664_2;At_S0003_100973664_3;	-	-
At03	At_S0003	p2	ATATATATATATATATAT	100975537	GOBAR_AA09278	100965852	100976481	+	GO:0005488|GO:0016773|GO:0046854|GO:0048015|	binding|phosphotransferase activity, alcohol group as acceptor|phosphatidylinositol phosphorylation|phosphatidylinositol-mediated signaling|	ko00562|ko04011|ko04070|	Inositol phosphate metabolism |MAPK signaling pathway - yeast |Phosphatidylinositol signaling system |	K00888	-	At_S0003_100975537_1;At_S0003_100975537_2;At_S0003_100975537_3;	-	-
At03	At_S0003	p4	TAGTTAGTTAGTTAGTTAGT	100992029	GOBAR_AA09276	100990064	100994803	+	GO:0005488|GO:0016773|GO:0046854|GO:0048015|	binding|phosphotransferase activity, alcohol group as acceptor|phosphatidylinositol phosphorylation|phosphatidylinositol-mediated signaling|	ko00562|ko04011|ko04070|	Inositol phosphate metabolism |MAPK signaling pathway - yeast |Phosphatidylinositol signaling system |	K00888	-	At_S0003_100992029_1;At_S0003_100992029_2;At_S0003_100992029_3;	-	-
At03	At_S0003	p6	ATAAAAATAAAAATAAAA	101187622	GOBAR_AA16951	101185330	101188757	-	GO:0016798|	hydrolase activity, acting on glycosyl bonds|	-	-	-	-	-	-	-
At03	At_S0003	p2	ATATATATATATATATAT	101210842	GOBAR_AA16948	101208004	101211535	-	GO:0003723|GO:0003723|GO:0003735|GO:0006412|GO:0015934|	RNA binding|RNA binding|structural constituent of ribosome|translation|large ribosomal subunit|	-	-	-	At_S0003_101210842_1;At_S0003_101210842_2;At_S0003_101210842_3;	-	-	-
At03	At_S0003	p3	CCGCCGCCGCCGCCGCCG	101262617	GOBAR_AA16941	101262473	101263288	+	GO:0046872|	metal ion binding|	-	-	-	-	At_S0003_101262617_1;At_S0003_101262617_2;At_S0003_101262617_3;	-	-
At03	At_S0003	p3	CAACAACAACAACAACAA	101263048	GOBAR_AA16941	101262473	101263288	+	GO:0046872|	metal ion binding|	-	-	-	-	At_S0003_101263048_1;At_S0003_101263048_2;At_S0003_101263048_3;	-	-
At03	At_S0003	p2	TGTGTGTGTGTGTGTGTGTGTGTGTGTGTGTGTGTGTGTG	101459696	GOBAR_AA35367	101458672	101460597	-	GO:0045454|	cell redox homeostasis|	-	-	-	At_S0003_101459696_1;At_S0003_101459696_2;At_S0003_101459696_3;	-	-	-
At03	At_S0003	p4	AAATAAATAAATAAATAAAT	101481466	GOBAR_AA34288	101480477	101490516	-	GO:0004725|GO:0016311|GO:0016791|GO:0005515|	protein tyrosine phosphatase activity|dephosphorylation|phosphatase activity|protein binding|	ko00562|ko04068|ko04070|ko04071|ko04151|ko04150|ko04115|ko04510|ko04530|ko04212|ko05200|ko05230|ko05206|ko05214|ko05218|ko05215|ko05213|ko05222|ko04931|ko05161|	Inositol phosphate metabolism |FoxO signaling pathway |Phosphatidylinositol signaling system |Sphingolipid signaling pathway |PI3K-Akt signaling pathway |mTOR signaling pathway |p53 signaling pathway |Focal adhesion |Tight junction |Longevity regulating pathway - worm |Pathways in cancer |Central carbon metabolism in cancer |MicroRNAs in cancer |Glioma |Melanoma |Prostate cancer |Endometrial canc…	K01110	-	At_S0003_101481466_1;At_S0003_101481466_2;At_S0003_101481466_3;	-	-
At03	At_S0003	p4	AAATAAATAAATAAATAAAT	101482984	GOBAR_AA34288	101480477	101490516	-	GO:0004725|GO:0016311|GO:0016791|GO:0005515|	protein tyrosine phosphatase activity|dephosphorylation|phosphatase activity|protein binding|	ko00562|ko04068|ko04070|ko04071|ko04151|ko04150|ko04115|ko04510|ko04530|ko04212|ko05200|ko05230|ko05206|ko05214|ko05218|ko05215|ko05213|ko05222|ko04931|ko05161|	Inositol phosphate metabolism |FoxO signaling pathway |Phosphatidylinositol signaling system |Sphingolipid signaling pathway |PI3K-Akt signaling pathway |mTOR signaling pathway |p53 signaling pathway |Focal adhesion |Tight junction |Longevity regulating pathway - worm |Pathways in cancer |Central carbon metabolism in cancer |MicroRNAs in cancer |Glioma |Melanoma |Prostate cancer |Endometrial canc…	K01110	-	At_S0003_101482984_1;At_S0003_101482984_2;At_S0003_101482984_3;	-	-
At03	At_S0003	p2	ACACACACACACACACACAC	101489671	GOBAR_AA34288	101480477	101490516	-	GO:0004725|GO:0016311|GO:0016791|GO:0005515|	protein tyrosine phosphatase activity|dephosphorylation|phosphatase activity|protein binding|	ko00562|ko04068|ko04070|ko04071|ko04151|ko04150|ko04115|ko04510|ko04530|ko04212|ko05200|ko05230|ko05206|ko05214|ko05218|ko05215|ko05213|ko05222|ko04931|ko05161|	Inositol phosphate metabolism |FoxO signaling pathway |Phosphatidylinositol signaling system |Sphingolipid signaling pathway |PI3K-Akt signaling pathway |mTOR signaling pathway |p53 signaling pathway |Focal adhesion |Tight junction |Longevity regulating pathway - worm |Pathways in cancer |Central carbon metabolism in cancer |MicroRNAs in cancer |Glioma |Melanoma |Prostate cancer |Endometrial canc…	K01110	-	At_S0003_101489671_1;At_S0003_101489671_2;At_S0003_101489671_3;	-	-
At03	At_S0003	p6	TTGTATTTGTATTTGTAT	101574200	GOBAR_AA32034	101573545	101577355	+	GO:0016021|GO:0055085|	integral component of membrane|transmembrane transport|	-	-	-	-	At_S0003_101574200_1;At_S0003_101574200_2;At_S0003_101574200_3;	-	-
At03	At_S0003	p1	TTTTTTTTTTTTTTTTTTTTTT	101729551	GOBAR_AA20278	101728756	101731490	-	GO:0004144|GO:0004144|GO:0045017|	diacylglycerol O-acyltransferase activity|diacylglycerol O-acyltransferase activity|glycerolipid biosynthetic process|	-	-	-	At_S0003_101729551_1;At_S0003_101729551_2;At_S0003_101729551_3;	-	-	-
At03	At_S0003	p6	TCACCATCACCATCACCA	101744586	GOBAR_AA20275	101742619	101744929	-	GO:0004144|GO:0004144|GO:0045017|	diacylglycerol O-acyltransferase activity|diacylglycerol O-acyltransferase activity|glycerolipid biosynthetic process|	-	-	-	-	At_S0003_101744586_1;At_S0003_101744586_2;At_S0003_101744586_3;	-	-
At03	At_S0003	p6	TATTTATATTTATATTTATATTTA	101752016	GOBAR_AA20273	101751707	101754220	+	-	-	-	-	-	At_S0003_101752016_1;At_S0003_101752016_2;At_S0003_101752016_3;	-	-	-
At03	At_S0003	p3	TTCTTCTTCTTCTTCTTC	101923541	GOBAR_AA28885	101923365	101924225	+	GO:0003677|GO:0003700|GO:0006355|	DNA binding|transcription factor activity, sequence-specific DNA binding|regulation of transcription, DNA-templated|	-	-	-	-	At_S0003_101923541_1;At_S0003_101923541_3;	At_S0003_101923541_2;	-
At03	At_S0003	p3	CTTCTTCTTCTTCTTCTTCTTCTT	101927798	GOBAR_AA28884	101925914	101929660	-	GO:0005515|	protein binding|	-	-	-	-	At_S0003_101927798_1;At_S0003_101927798_2;	-	At_S0003_101927798_3;
At03	At_S0003	p3	AATAATAATAATAATAATAAT	102319419	GOBAR_AA08503	102315945	102323809	-	GO:0005216|GO:0006811|GO:0016020|GO:0055085|GO:0005249|GO:0006813|GO:0016020|GO:0005515|	ion channel activity|ion transport|membrane|transmembrane transport|voltage-gated potassium channel activity|potassium ion transport|membrane|protein binding|	-	-	-	-	At_S0003_102319419_1;At_S0003_102319419_2;At_S0003_102319419_3;	-	-
At03	At_S0003	p4	ATACATACATACATACATACATACATACATACATACATACATACATACATACATACATAC	102390879	GOBAR_AA25702	102385255	102391390	-	GO:0005515|GO:0007165|	protein binding|signal transduction|	ko04014|ko04011|ko04151|ko04062|ko04724|ko04727|ko04725|ko04728|ko04726|ko04723|ko04744|ko04740|ko04713|ko05200|ko05032|ko05034|	Ras signaling pathway |MAPK signaling pathway - yeast |PI3K-Akt signaling pathway |Chemokine signaling pathway |Glutamatergic synapse |GABAergic synapse |Cholinergic synapse |Dopaminergic synapse |Serotonergic synapse |Retrograde endocannabinoid signaling |Phototransduction |Olfactory transduction |Circadian entrainment |Pathways in cancer |Morphine addiction |Alcoholism |	K04536	-	-	At_S0003_102390879_1;At_S0003_102390879_2;At_S0003_102390879_3;	-
At03	At_S0003	p3	AATAATAATAATAATAATAAT	102417881	GOBAR_AA25697	102416692	102419839	-	GO:0004672|GO:0005524|GO:0006468|GO:0004672|GO:0006468|GO:0005524|	protein kinase activity|ATP binding|protein phosphorylation|protein kinase activity|protein phosphorylation|ATP binding|	-	-	-	-	At_S0003_102417881_1;At_S0003_102417881_2;At_S0003_102417881_3;	-	-
At03	At_S0003	p4	TATGTATGTATGTATGTATGTATG	102485937	GOBAR_AA25689	102484607	102486654	+	GO:0046983|	protein dimerization activity|	-	-	-	At_S0003_102485937_1;At_S0003_102485937_2;At_S0003_102485937_3;	-	-	-
At03	At_S0003	p6	ACCATTACCATTACCATT	102537255	GOBAR_AA36025	102533036	102537416	-	GO:0000166|GO:0003676|GO:0003723|GO:0005634|GO:0006396|GO:0030529|	nucleotide binding|nucleic acid binding|RNA binding|nucleus|RNA processing|intracellular ribonucleoprotein complex|	-	-	K15191	At_S0003_102537255_1;At_S0003_102537255_2;At_S0003_102537255_3;	-	-	-
At03	At_S0003	p6	ATATACATATACATATAC	102543137	GOBAR_AA36026	102542433	102547500	-	GO:0005515|	protein binding|	-	-	K15223	-	At_S0003_102543137_1;At_S0003_102543137_2;At_S0003_102543137_3;	-	-
At03	At_S0003	p4	AAATAAATAAATAAATAAAT	102572514	GOBAR_AA14720	102570896	102573200	-	-	-	-	-	-	At_S0003_102572514_1;At_S0003_102572514_2;At_S0003_102572514_3;	-	-	-
At03	At_S0003	p2	TATATATATATATATATATA	102639698	GOBAR_AA14712	102637263	102640457	+	GO:0005215|GO:0005622|GO:0006810|	transporter activity|intracellular|transport|	-	-	-	-	At_S0003_102639698_1;At_S0003_102639698_2;At_S0003_102639698_3;	-	-
At03	At_S0003	p6	ATAAAAATAAAAATAAAA	102700674	GOBAR_AA14704	102696184	102701530	-	GO:0008641|GO:0016925|GO:0019948|	small protein activating enzyme activity|protein sumoylation|SUMO activating enzyme activity|	ko04120|	Ubiquitin mediated proteolysis |	K10685	-	At_S0003_102700674_1;At_S0003_102700674_2;At_S0003_102700674_3;	-	-
At03	At_S0003	p3	TTGTTGTTGTTGTTGTTG	102723425	GOBAR_AA14702	102722709	102727768	+	GO:0000166|GO:0003676|	nucleotide binding|nucleic acid binding|	-	-	K14573	At_S0003_102723425_1;At_S0003_102723425_2;	At_S0003_102723425_3;	-	-
At03	At_S0003	p4	ATGTATGTATGTATGTATGT	102735606	GOBAR_AA14701	102734871	102738828	+	GO:0004553|GO:0005975|GO:0005975|	hydrolase activity, hydrolyzing O-glycosyl compounds|carbohydrate metabolic process|carbohydrate metabolic process|	-	-	-	-	At_S0003_102735606_1;At_S0003_102735606_2;At_S0003_102735606_3;	-	-
At03	At_S0003	p2	ACACACACACACACACACACACAC	102736063	GOBAR_AA14701	102734871	102738828	+	GO:0004553|GO:0005975|GO:0005975|	hydrolase activity, hydrolyzing O-glycosyl compounds|carbohydrate metabolic process|carbohydrate metabolic process|	-	-	-	-	At_S0003_102736063_1;At_S0003_102736063_2;At_S0003_102736063_3;	-	-
At03	At_S0003	p4	ACATACATACATACATACAT	102736256	GOBAR_AA14701	102734871	102738828	+	GO:0004553|GO:0005975|GO:0005975|	hydrolase activity, hydrolyzing O-glycosyl compounds|carbohydrate metabolic process|carbohydrate metabolic process|	-	-	-	-	At_S0003_102736256_1;At_S0003_102736256_2;At_S0003_102736256_3;	-	-
At03	At_S0003	p6	CGGCTCCGGCTCCGGCTCCGGCTCCGGCTC	102874260	GOBAR_AA04571	102874039	102885110	-	GO:0003677|GO:0003677|GO:0005634|GO:0006352|GO:0016570|GO:0005515|GO:0005515|GO:0008270|GO:0046872|	DNA binding|DNA binding|nucleus|DNA-templated transcription, initiation|histone modification|protein binding|protein binding|zinc ion binding|metal ion binding|	-	-	-	-	At_S0003_102874260_1;At_S0003_102874260_2;At_S0003_102874260_3;	-	-
At03	At_S0003	p2	TGTGTGTGTGTGTGTGTGTG	102877317	GOBAR_AA04571	102874039	102885110	-	GO:0003677|GO:0003677|GO:0005634|GO:0006352|GO:0016570|GO:0005515|GO:0005515|GO:0008270|GO:0046872|	DNA binding|DNA binding|nucleus|DNA-templated transcription, initiation|histone modification|protein binding|protein binding|zinc ion binding|metal ion binding|	-	-	-	-	-	At_S0003_102877317_1;At_S0003_102877317_2;At_S0003_102877317_3;	-
At03	At_S0003	p2	TGTGTGTGTGTGTGTGTGTG	102878571	GOBAR_AA04571	102874039	102885110	-	GO:0003677|GO:0003677|GO:0005634|GO:0006352|GO:0016570|GO:0005515|GO:0005515|GO:0008270|GO:0046872|	DNA binding|DNA binding|nucleus|DNA-templated transcription, initiation|histone modification|protein binding|protein binding|zinc ion binding|metal ion binding|	-	-	-	-	-	At_S0003_102878571_1;At_S0003_102878571_2;At_S0003_102878571_3;	-
At03	At_S0003	p5	GGGTTGGGTTGGGTTGGGTT	103150865	GOBAR_AA04611	103147860	103152125	+	GO:0046983|	protein dimerization activity|	-	-	-	-	-	-	At_S0003_103150865_1;At_S0003_103150865_2;At_S0003_103150865_3;
At03	At_S0003	p2	ATATATATATATATATAT	103166191	GOBAR_AA04613	103164414	103170033	+	GO:0006621|GO:0016021|GO:0046923|	protein retention in ER lumen|integral component of membrane|ER retention sequence binding|	-	-	-	-	-	-	At_S0003_103166191_1;At_S0003_103166191_2;At_S0003_103166191_3;
At03	At_S0003	p6	ATGGAGATGGAGATGGAG	103579520	GOBAR_AA04219	103568806	103579732	+	-	-	-	-	K10706	At_S0003_103579520_3;	At_S0003_103579520_1;At_S0003_103579520_2;	-	-
At03	At_S0003	p4	GTATGTATGTATGTATGTATGTAT	103626817	GOBAR_AA04211	103626646	103628201	-	-	-	-	-	-	At_S0003_103626817_1;At_S0003_103626817_2;At_S0003_103626817_3;	-	-	-
At03	At_S0003	p2	TATATATATATATATATATATA	103732200	GOBAR_AA04195	103732020	103734698	+	GO:0004506|GO:0016021|GO:0050660|GO:0055114|GO:0016491|GO:0055114|	squalene monooxygenase activity|integral component of membrane|flavin adenine dinucleotide binding|oxidation-reduction process|oxidoreductase activity|oxidation-reduction process|	ko00100|ko00909|	Steroid biosynthesis |Sesquiterpenoid and triterpenoid biosynthesis |	K00511	At_S0003_103732200_1;At_S0003_103732200_2;At_S0003_103732200_3;	-	-	-
At03	At_S0003	p4	AAACAAACAAACAAACAAAC	103769684	GOBAR_AA04189	103769025	103770051	-	GO:0003677|GO:0046983|	DNA binding|protein dimerization activity|	-	-	-	-	At_S0003_103769684_1;At_S0003_103769684_2;At_S0003_103769684_3;	-	-
At03	At_S0003	p6	ATGGCAATGGCAATGGCA	103770050	GOBAR_AA04189	103769025	103770051	-	GO:0003677|GO:0046983|	DNA binding|protein dimerization activity|	-	-	-	-	-	-	At_S0003_103770050_1;At_S0003_103770050_2;At_S0003_103770050_3;
At03	At_S0003	p4	TAAATAAATAAATAAATAAATAAATAAATAAA	103997458	GOBAR_AA29823	103996824	104005366	+	GO:0005215|GO:0006811|GO:0016020|GO:0006810|GO:0016020|GO:0055085|GO:0006811|GO:0015377|GO:0016021|	transporter activity|ion transport|membrane|transport|membrane|transmembrane transport|ion transport|cation:chloride symporter activity|integral component of membrane|	-	-	K14427	-	-	At_S0003_103997458_1;At_S0003_103997458_2;At_S0003_103997458_3;	-
At03	At_S0003	p6	GCAATTGCAATTGCAATT	104016586	GOBAR_AA29826	104015962	104019345	-	GO:0009055|GO:0020037|	electron carrier activity|heme binding|	ko00920|ko02020|ko04210|ko04214|ko04115|ko05200|ko05210|ko05222|ko05010|ko05012|ko05014|ko05016|ko05416|ko04932|ko05134|ko05152|ko05164|ko05161|ko05168|ko05145|	Sulfur metabolism |Two-component system |Apoptosis |Apoptosis -fly |p53 signaling pathway |Pathways in cancer |Colorectal cancer |Small cell lung cancer |Alzheimer's disease |Parkinson's disease |Amyotrophic lateral sclerosis (ALS) |Huntington's disease |Viral myocarditis |Non-alcoholic fatty liver disease (NAFLD) |Legionellosis |Tuberculosis |Influenza A |Hepatitis B |Herpes simplex infection |T…	K08738	-	-	-	At_S0003_104016586_1;At_S0003_104016586_2;At_S0003_104016586_3;
At03	At_S0003	p2	AGAGAGAGAGAGAGAGAG	104031947	GOBAR_AA29829	104031477	104034495	+	GO:0003924|GO:0005525|GO:0006886|GO:0006913|GO:0007165|GO:0005525|GO:0005525|GO:0005622|GO:0007264|GO:0005525|GO:0007165|GO:0016020|GO:0005525|GO:0007264|GO:0005525|GO:0007264|GO:0015031|	GTPase activity|GTP binding|intracellular protein transport|nucleocytoplasmic transport|signal transduction|GTP binding|GTP binding|intracellular|small GTPase mediated signal transduction|GTP binding|signal transduction|membrane|GTP binding|small GTPase mediated signal transduction|GTP binding|small GTPase mediated signal transduction|protein transport|	ko05134|	Legionellosis |	-	At_S0003_104031947_1;At_S0003_104031947_2;At_S0003_104031947_3;	-	-	-
At03	At_S0003	p6	GAAAGAGAAAGAGAAAGA	104046517	GOBAR_AA29832	104043540	104048010	+	GO:0000166|	nucleotide binding|	ko03013|ko03015|	RNA transport |mRNA surveillance pathway |	K14328	-	-	At_S0003_104046517_1;At_S0003_104046517_2;At_S0003_104046517_3;	-
At03	At_S0003	p4	ATGTATGTATGTATGTATGTATGTATGTATGTATGTATGTATGTATGTATGTATGTATGT	104054630	GOBAR_AA29834	104054309	104054865	+	-	-	-	-	-	At_S0003_104054630_1;At_S0003_104054630_2;At_S0003_104054630_3;	-	-	-
At03	At_S0003	p6	TGAGGCTGAGGCTGAGGC	104105035	GOBAR_AA31244	104105004	104106137	-	GO:0005215|GO:0016021|	transporter activity|integral component of membrane|	-	-	-	-	At_S0003_104105035_1;At_S0003_104105035_2;At_S0003_104105035_3;	-	-
At03	At_S0003	p3	GAAGAAGAAGAAGAAGAA	104133036	GOBAR_AA31242	104129645	104135776	-	GO:0004672|GO:0005524|GO:0006468|GO:0004672|GO:0006468|GO:0005515|	protein kinase activity|ATP binding|protein phosphorylation|protein kinase activity|protein phosphorylation|protein binding|	-	-	-	-	-	At_S0003_104133036_1;At_S0003_104133036_2;At_S0003_104133036_3;	-
At03	At_S0003	p3	GAAGAAGAAGAAGAAGAA	104134290	GOBAR_AA31242	104129645	104135776	-	GO:0004672|GO:0005524|GO:0006468|GO:0004672|GO:0006468|GO:0005515|	protein kinase activity|ATP binding|protein phosphorylation|protein kinase activity|protein phosphorylation|protein binding|	-	-	-	-	-	At_S0003_104134290_1;At_S0003_104134290_2;At_S0003_104134290_3;	-
At03	At_S0003	p5	GAGATGAGATGAGATGAGATGAGAT	104137463	GOBAR_AA31241	104136873	104145894	+	GO:0008152|GO:0070569|	metabolic process|uridylyltransferase activity|	ko00520|	Amino sugar and nucleotide sugar metabolism |	K00972	-	-	At_S0003_104137463_1;At_S0003_104137463_2;At_S0003_104137463_3;	-
At03	At_S0003	p6	AAAAGCAAAAGCAAAAGC	104137952	GOBAR_AA31241	104136873	104145894	+	GO:0008152|GO:0070569|	metabolic process|uridylyltransferase activity|	ko00520|	Amino sugar and nucleotide sugar metabolism |	K00972	-	-	At_S0003_104137952_1;At_S0003_104137952_2;At_S0003_104137952_3;	-
At03	At_S0003	p4	TACATACATACATACATACATACATACATACATACATACATACATACATACA	104139171	GOBAR_AA31241	104136873	104145894	+	GO:0008152|GO:0070569|	metabolic process|uridylyltransferase activity|	ko00520|	Amino sugar and nucleotide sugar metabolism |	K00972	-	At_S0003_104139171_1;At_S0003_104139171_2;At_S0003_104139171_3;	-	-
At03	At_S0003	p3	GAGGAGGAGGAGGAGGAG	104183651	GOBAR_AA31235	104183098	104185293	+	-	-	-	-	-	-	At_S0003_104183651_1;At_S0003_104183651_3;	At_S0003_104183651_2;	-
At04	At_S0175	p6	GGGAGAGGGAGAGGGAGAGGGAGA	8445	GOBAR_AA06468	3545	9824	-	GO:0004506|GO:0016021|GO:0050660|GO:0055114|GO:0016491|GO:0055114|	squalene monooxygenase activity|integral component of membrane|flavin adenine dinucleotide binding|oxidation-reduction process|oxidoreductase activity|oxidation-reduction process|	-	-	K00511	At_S0175_8445_1;At_S0175_8445_3;	At_S0175_8445_2;	-	-
At04	At_S0175	p6	TAAAAATAAAAATAAAAA	8669	GOBAR_AA06468	3545	9824	-	GO:0004506|GO:0016021|GO:0050660|GO:0055114|GO:0016491|GO:0055114|	squalene monooxygenase activity|integral component of membrane|flavin adenine dinucleotide binding|oxidation-reduction process|oxidoreductase activity|oxidation-reduction process|	-	-	K00511	-	At_S0175_8669_1;At_S0175_8669_3;	At_S0175_8669_2;	-
At04	At_S0175	p3	AATAATAATAATAATAAT	8877	GOBAR_AA06468	3545	9824	-	GO:0004506|GO:0016021|GO:0050660|GO:0055114|GO:0016491|GO:0055114|	squalene monooxygenase activity|integral component of membrane|flavin adenine dinucleotide binding|oxidation-reduction process|oxidoreductase activity|oxidation-reduction process|	-	-	K00511	At_S0175_8877_1;At_S0175_8877_2;At_S0175_8877_3;	-	-	-
At04	At_S0563	p3	TGCTGCTGCTGCTGCTGC	12940	GOBAR_AA22226	11242	14178	+	GO:0006511|GO:0008540|	ubiquitin-dependent protein catabolic process|proteasome regulatory particle, base subcomplex|	ko03050|ko05169|	Proteasome |Epstein-Barr virus infection |	K03029	At_S0563_12940_1;At_S0563_12940_2;At_S0563_12940_3;	-	-	-
At04	At_S0209	p1	AAAAAAAAAAAAAAAAAAAA	15212	GOBAR_AA08088	12729	32087	-	GO:0005488|GO:0016773|GO:0046854|GO:0048015|	binding|phosphotransferase activity, alcohol group as acceptor|phosphatidylinositol phosphorylation|phosphatidylinositol-mediated signaling|	ko00562|ko04011|ko04070|	Inositol phosphate metabolism |MAPK signaling pathway - yeast |Phosphatidylinositol signaling system |	K00888	At_S0209_15212_1;At_S0209_15212_2;At_S0209_15212_3;	-	-	-
At04	At_S0175	p6	CACCCTCACCCTCACCCT	17069	GOBAR_AA06469	12740	22788	-	GO:0004506|GO:0016021|GO:0050660|GO:0055114|GO:0016491|GO:0055114|	squalene monooxygenase activity|integral component of membrane|flavin adenine dinucleotide binding|oxidation-reduction process|oxidoreductase activity|oxidation-reduction process|	ko00100|ko00909|	Steroid biosynthesis |Sesquiterpenoid and triterpenoid biosynthesis |	K00511	-	-	-	At_S0175_17069_1;At_S0175_17069_2;At_S0175_17069_3;
At04	At_S0562	p6	TATTTTTATTTTTATTTT	19402	GOBAR_AA22212	19157	25683	+	GO:0005515|	protein binding|	-	-	-	-	At_S0562_19402_1;At_S0562_19402_2;At_S0562_19402_3;	-	-
At04	At_S0562	p6	GAGCTGGAGCTGGAGCTGGAGCTG	27405	GOBAR_AA22213	26550	27709	-	GO:0006950|GO:0009415|	response to stress|response to water|	-	-	-	At_S0562_27405_1;At_S0562_27405_2;At_S0562_27405_3;	-	-	-
At04	At_S0209	p2	AGAGAGAGAGAGAGAGAGAGAGAGAGAG	30184	GOBAR_AA08088	12729	32087	-	GO:0005488|GO:0016773|GO:0046854|GO:0048015|	binding|phosphotransferase activity, alcohol group as acceptor|phosphatidylinositol phosphorylation|phosphatidylinositol-mediated signaling|	ko00562|ko04011|ko04070|	Inositol phosphate metabolism |MAPK signaling pathway - yeast |Phosphatidylinositol signaling system |	K00888	-	At_S0209_30184_1;At_S0209_30184_2;At_S0209_30184_3;	-	-
At04	At_S0185	p2	AGAGAGAGAGAGAGAGAG	37119	GOBAR_AA06832	28427	37486	-	GO:0005215|GO:0006810|GO:0016020|	transporter activity|transport|membrane|	-	-	K14513	-	At_S0185_37119_1;At_S0185_37119_2;At_S0185_37119_3;	-	-
At04	At_S0004	p6	TCTTTTTCTTTTTCTTTT	40871	GOBAR_AA34274	40517	48231	-	GO:0005515|	protein binding|	ko04146|	Peroxisome |	K13342	-	At_S0004_40871_1;At_S0004_40871_2;At_S0004_40871_3;	-	-
At04	At_S0209	p6	GGGACAGGGACAGGGACAGGGACA	41130	GOBAR_AA08089	40568	41539	-	-	-	-	-	-	At_S0209_41130_1;At_S0209_41130_3;	At_S0209_41130_2;	-	-
At04	At_S0563	p3	ATAATAATAATAATAATAATAATAATA	45326	GOBAR_AA22232	42493	46742	-	GO:0016491|GO:0055114|GO:0071949|	oxidoreductase activity|oxidation-reduction process|FAD binding|	-	-	-	-	-	-	At_S0563_45326_1;At_S0563_45326_2;At_S0563_45326_3;
At04	At_S0563	p3	ATAATAATAATAATAATAATAATAATA	46611	GOBAR_AA22232	42493	46742	-	GO:0016491|GO:0055114|GO:0071949|	oxidoreductase activity|oxidation-reduction process|FAD binding|	-	-	-	-	-	-	At_S0563_46611_1;At_S0563_46611_2;At_S0563_46611_3;
At04	At_S0562	p4	ATGTATGTATGTATGTATGTATGTATGTATGTATGTATGTATGTATGTATGT	48922	GOBAR_AA22216	48763	54937	-	GO:0005215|GO:0005622|GO:0006810|	transporter activity|intracellular|transport|	-	-	-	-	At_S0562_48922_1;At_S0562_48922_2;At_S0562_48922_3;	-	-
At04	At_S0562	p4	ATGTATGTATGTATGTATGTATGTATGTATGTATGTATGTATGTATGTATGT	49987	GOBAR_AA22216	48763	54937	-	GO:0005215|GO:0005622|GO:0006810|	transporter activity|intracellular|transport|	-	-	-	-	At_S0562_49987_1;At_S0562_49987_2;At_S0562_49987_3;	-	-
At04	At_S0562	p2	ACACACACACACACACACACAC	52484	GOBAR_AA22216	48763	54937	-	GO:0005215|GO:0005622|GO:0006810|	transporter activity|intracellular|transport|	-	-	-	At_S0562_52484_1;At_S0562_52484_2;At_S0562_52484_3;	-	-	-
At04	At_S0562	p2	ACACACACACACACACACACAC	53848	GOBAR_AA22216	48763	54937	-	GO:0005215|GO:0005622|GO:0006810|	transporter activity|intracellular|transport|	-	-	-	-	-	At_S0562_53848_1;At_S0562_53848_2;At_S0562_53848_3;	-
At04	At_S0054	p3	TGATGATGATGATGATGATGATGATGA	58354	GOBAR_AA01877	57698	58642	+	-	-	-	-	-	-	-	-	At_S0054_58354_1;At_S0054_58354_2;At_S0054_58354_3;
At04	At_S0152	p3	CTACTACTACTACTACTACTACTA	81917	GOBAR_AA05797	81073	82250	+	GO:0003677|	DNA binding|	-	-	K09422	At_S0152_81917_1;At_S0152_81917_2;At_S0152_81917_3;	-	-	-
At04	At_S0054	p4	ATTCATTCATTCATTCATTC	85130	GOBAR_AA01880	81351	85544	-	GO:0007275|	multicellular organism development|	-	-	-	-	At_S0054_85130_1;At_S0054_85130_2;At_S0054_85130_3;	-	-
At04	At_S0077	p1	TTTTTTTTTTTTTTTTTTTT	137559	GOBAR_AA02967	136098	140870	-	-	-	-	-	-	At_S0077_137559_1;At_S0077_137559_2;At_S0077_137559_3;	-	-	-
At04	At_S0152	p2	ATATATATATATATATAT	146307	GOBAR_AA05798	145334	146609	+	GO:0004089|GO:0006730|GO:0008270|	carbonate dehydratase activity|one-carbon metabolic process|zinc ion binding|	-	-	K01674	-	At_S0152_146307_1;At_S0152_146307_2;At_S0152_146307_3;	-	-
At04	At_S0152	p2	AGAGAGAGAGAGAGAGAGAGAGAGAGAG	148876	GOBAR_AA05799	147043	148982	-	GO:0005515|GO:0008270|GO:0008270|	protein binding|zinc ion binding|zinc ion binding|	ko04120|ko04115|ko05162|	Ubiquitin mediated proteolysis |p53 signaling pathway |Measles |	K10144	-	At_S0152_148876_1;At_S0152_148876_2;At_S0152_148876_3;	-	-
At04	At_S0185	p6	AAAAATAAAAATAAAAAT	157550	GOBAR_AA06834	148600	157955	-	-	-	-	-	-	-	-	-	At_S0185_157550_1;At_S0185_157550_2;At_S0185_157550_3;
At04	At_S0004	p2	TCTCTCTCTCTCTCTCTCTCTCTC	175462	GOBAR_AA29036	175287	189077	+	GO:0005488|	binding|	ko03050|	Proteasome |	K06699	-	At_S0004_175462_1;At_S0004_175462_2;At_S0004_175462_3;	-	-
At04	At_S0004	p1	TTTTTTTTTTTTTTTTTT	179016	GOBAR_AA29036	175287	189077	+	GO:0005488|	binding|	ko03050|	Proteasome |	K06699	-	At_S0004_179016_1;At_S0004_179016_2;At_S0004_179016_3;	-	-
At04	At_S0039	p3	GAAGAAGAAGAAGAAGAA	205058	GOBAR_AA01145	204278	205183	+	-	-	-	-	-	At_S0039_205058_3;	At_S0039_205058_1;At_S0039_205058_2;	-	-
At04	At_S0026	p3	AATAATAATAATAATAATAAT	229225	GOBAR_AA00448	227474	232853	-	GO:0005515|	protein binding|	ko03050|ko05169|	Proteasome |Epstein-Barr virus infection |	K03038	-	-	At_S0026_229225_1;At_S0026_229225_2;At_S0026_229225_3;	-
At04	At_S0026	p3	AATAATAATAATAATAATAAT	230435	GOBAR_AA00448	227474	232853	-	GO:0005515|	protein binding|	ko03050|ko05169|	Proteasome |Epstein-Barr virus infection |	K03038	-	-	At_S0026_230435_1;At_S0026_230435_2;At_S0026_230435_3;	-
At04	At_S0026	p3	AATAATAATAATAATAATAAT	232440	GOBAR_AA00448	227474	232853	-	GO:0005515|	protein binding|	ko03050|ko05169|	Proteasome |Epstein-Barr virus infection |	K03038	-	-	At_S0026_232440_1;At_S0026_232440_2;At_S0026_232440_3;	-
At04	At_S0053	p3	TCTTCTTCTTCTTCTTCT	279785	GOBAR_AA01868	279689	280122	+	-	-	-	-	-	At_S0053_279785_1;At_S0053_279785_2;At_S0053_279785_3;	-	-	-
At04	At_S0004	p2	TGTGTGTGTGTGTGTGTGTGTGTGTGTG	358365	GOBAR_AA19546	357001	360593	+	GO:0003824|	catalytic activity|	ko00052|	Galactose metabolism |	K06617	-	-	At_S0004_358365_1;At_S0004_358365_2;At_S0004_358365_3;	-
At04	At_S0004	p6	CTGCTACTGCTACTGCTA	430226	GOBAR_AA30266	429822	431467	+	-	-	-	-	-	-	-	At_S0004_430226_1;At_S0004_430226_2;At_S0004_430226_3;	-
At04	At_S0004	p2	ATATATATATATATATATAT	462696	GOBAR_AA30272	460441	466155	-	GO:0004252|GO:0006508|	serine-type endopeptidase activity|proteolysis|	-	-	-	-	At_S0004_462696_1;At_S0004_462696_2;At_S0004_462696_3;	-	-
At04	At_S0004	p3	GGTGGTGGTGGTGGTGGTGGT	466014	GOBAR_AA30272	460441	466155	-	GO:0004252|GO:0006508|	serine-type endopeptidase activity|proteolysis|	-	-	-	-	At_S0004_466014_1;At_S0004_466014_2;At_S0004_466014_3;	-	-
At04	At_S0004	p2	AGAGAGAGAGAGAGAGAGAGAGAGAGAG	475878	GOBAR_AA30274	471723	476324	-	GO:0005515|	protein binding|	-	-	-	-	At_S0004_475878_1;At_S0004_475878_2;At_S0004_475878_3;	-	-
At04	At_S0004	p6	ATATCTATATCTATATCT	684094	GOBAR_AA34909	681145	690724	+	GO:0003777|GO:0005524|GO:0007018|GO:0008017|GO:0003777|GO:0007018|GO:0005515|	microtubule motor activity|ATP binding|microtubule-based movement|microtubule binding|microtubule motor activity|microtubule-based movement|protein binding|	-	-	-	-	-	At_S0004_684094_1;At_S0004_684094_2;At_S0004_684094_3;	-
At04	At_S0004	p3	GAAGAAGAAGAAGAAGAAGAAGAAGAAGAAGAA	719843	GOBAR_AA34904	718819	722000	-	GO:0006810|GO:0016021|GO:0016192|	transport|integral component of membrane|vesicle-mediated transport|	-	-	-	-	At_S0004_719843_1;At_S0004_719843_2;At_S0004_719843_3;	-	-
At04	At_S0004	p6	TATGTATATGTATATGTA	811534	GOBAR_AA30884	810044	813158	-	GO:0004185|GO:0006508|	serine-type carboxypeptidase activity|proteolysis|	-	-	-	-	At_S0004_811534_1;At_S0004_811534_2;At_S0004_811534_3;	-	-
At04	At_S0004	p2	TATATATATATATATATA	812364	GOBAR_AA30884	810044	813158	-	GO:0004185|GO:0006508|	serine-type carboxypeptidase activity|proteolysis|	-	-	-	-	At_S0004_812364_1;At_S0004_812364_2;At_S0004_812364_3;	-	-
At04	At_S0004	p3	ATAATAATAATAATAATA	812955	GOBAR_AA30884	810044	813158	-	GO:0004185|GO:0006508|	serine-type carboxypeptidase activity|proteolysis|	-	-	-	At_S0004_812955_1;At_S0004_812955_2;At_S0004_812955_3;	-	-	-
At04	At_S0004	p3	ATAATAATAATAATAATA	888465	GOBAR_AA00888	888143	889662	-	GO:0009055|	electron carrier activity|	-	-	-	At_S0004_888465_1;At_S0004_888465_2;At_S0004_888465_3;	-	-	-
At04	At_S0004	p2	TCTCTCTCTCTCTCTCTCTC	1238791	GOBAR_AA06864	1238048	1239785	+	GO:0003677|GO:0003700|GO:0006355|	DNA binding|transcription factor activity, sequence-specific DNA binding|regulation of transcription, DNA-templated|	-	-	K09286	-	-	At_S0004_1238791_1;At_S0004_1238791_2;At_S0004_1238791_3;	-
At04	At_S0004	p3	GTCGTCGTCGTCGTCGTC	1319839	GOBAR_AA06856	1314135	1320285	-	GO:0003677|GO:0003677|GO:0003917|GO:0005694|GO:0006265|GO:0003677|GO:0003917|GO:0006265|GO:0003677|GO:0003918|GO:0006265|GO:0003917|	DNA binding|DNA binding|DNA topoisomerase type I activity|chromosome|DNA topological change|DNA binding|DNA topoisomerase type I activity|DNA topological change|DNA binding|DNA topoisomerase type II (ATP-hydrolyzing) activity|DNA topological change|DNA topoisomerase type I activity|	-	-	K03163	-	At_S0004_1319839_1;At_S0004_1319839_2;At_S0004_1319839_3;	-	-
At04	At_S0004	p6	GGTGTGGGTGTGGGTGTG	1561953	GOBAR_AA06835	1561841	1563933	-	-	-	-	-	-	-	-	At_S0004_1561953_1;At_S0004_1561953_2;At_S0004_1561953_3;	-
At04	At_S0004	p5	TTGTTTTGTTTTGTTTTGTT	1753908	GOBAR_AA11624	1753198	1757415	+	GO:0002143|GO:0004792|GO:0005829|GO:0008641|	tRNA wobble position uridine thiolation|thiosulfate sulfurtransferase activity|cytosol|small protein activating enzyme activity|	ko04122|	Sulfur relay system |	K11996	At_S0004_1753908_1;At_S0004_1753908_2;At_S0004_1753908_3;	-	-	-
At04	At_S0004	p6	TGAAAATGAAAATGAAAA	1815858	GOBAR_AA11619	1801068	1818755	-	GO:0003824|GO:0003824|GO:0005975|GO:0003824|GO:0005975|GO:0043169|GO:0004553|GO:0005975|GO:0005975|	catalytic activity|catalytic activity|carbohydrate metabolic process|catalytic activity|carbohydrate metabolic process|cation binding|hydrolase activity, hydrolyzing O-glycosyl compounds|carbohydrate metabolic process|carbohydrate metabolic process|	-	-	-	-	-	At_S0004_1815858_1;At_S0004_1815858_2;At_S0004_1815858_3;	-
At04	At_S0004	p6	TAAGGGTAAGGGTAAGGG	2661611	GOBAR_AA08990	2660393	2663305	-	GO:0043531|	ADP binding|	-	-	-	-	-	-	At_S0004_2661611_1;At_S0004_2661611_2;At_S0004_2661611_3;
At04	At_S0004	p3	TCCTCCTCCTCCTCCTCCTCCTCCTCCTCCTCCTCCTCC	2746648	GOBAR_AA08997	2743847	2746895	-	-	-	-	-	-	-	At_S0004_2746648_1;At_S0004_2746648_2;At_S0004_2746648_3;	-	-
At04	At_S0004	p3	GAAGAAGAAGAAGAAGAAGAAGAA	2916990	GOBAR_AA17580	2912661	2917957	-	-	-	-	-	-	-	-	At_S0004_2916990_1;At_S0004_2916990_2;At_S0004_2916990_3;	-
At04	At_S0004	p3	ATCATCATCATCATCATC	3451519	GOBAR_AA25428	3450456	3451607	-	GO:0009055|	electron carrier activity|	-	-	-	-	At_S0004_3451519_1;At_S0004_3451519_2;At_S0004_3451519_3;	-	-
At04	At_S0004	p2	ATATATATATATATATATAT	4491781	GOBAR_AA15247	4490618	4493371	+	GO:0000287|GO:0010333|GO:0016829|GO:0008152|GO:0010333|GO:0016829|	magnesium ion binding|terpene synthase activity|lyase activity|metabolic process|terpene synthase activity|lyase activity|	-	-	-	-	At_S0004_4491781_3;	At_S0004_4491781_2;	At_S0004_4491781_1;
At04	At_S0004	p3	TCTTCTTCTTCTTCTTCT	4530239	GOBAR_AA15244	4529200	4530389	-	-	-	-	-	-	-	At_S0004_4530239_1;At_S0004_4530239_2;At_S0004_4530239_3;	-	-
At04	At_S0004	p2	CTCTCTCTCTCTCTCTCTCTCTCTCTCTCTCTCTCTCTCTCTCT	4840527	GOBAR_AA28973	4840405	4843056	+	-	-	-	-	-	-	At_S0004_4840527_1;At_S0004_4840527_2;At_S0004_4840527_3;	-	-
At04	At_S0004	p3	GGCGGCGGCGGCGGCGGCGGC	4932958	GOBAR_AA28964	4932505	4933631	+	GO:0005622|GO:0008270|	intracellular|zinc ion binding|	-	-	-	-	At_S0004_4932958_1;At_S0004_4932958_2;At_S0004_4932958_3;	-	-
At04	At_S0004	p6	GCGAATGCGAATGCGAAT	5644552	GOBAR_AA18119	5643231	5644777	+	GO:0008152|GO:0016491|GO:0016630|GO:0055114|	metabolic process|oxidoreductase activity|protochlorophyllide reductase activity|oxidation-reduction process|	ko00860|	Porphyrin and chlorophyll metabolism |	K00218	-	At_S0004_5644552_1;At_S0004_5644552_2;At_S0004_5644552_3;	-	-
At04	At_S0004	p6	TAATTATAATTATAATTA	5726226	GOBAR_AA18122	5725367	5727555	-	GO:0006952|GO:0009607|	defense response|response to biotic stimulus|	-	-	-	-	-	-	At_S0004_5726226_1;At_S0004_5726226_2;At_S0004_5726226_3;
At04	At_S0004	p3	GATGATGATGATGATGATGAT	5914810	GOBAR_AA10482	5911080	5915404	+	GO:0005525|GO:0005730|	GTP binding|nucleolus|	ko03008|	Ribosome biogenesis in eukaryotes |	K14537	-	At_S0004_5914810_1;At_S0004_5914810_2;At_S0004_5914810_3;	-	-
At04	At_S0004	p5	TAAAATAAAATAAAATAAAA	6659965	GOBAR_AA35940	6659873	6670165	+	GO:0005515|	protein binding|	-	-	-	-	-	-	At_S0004_6659965_1;At_S0004_6659965_2;At_S0004_6659965_3;
At04	At_S0004	p5	AATAAAATAAAATAAAATAAAATAA	7123455	GOBAR_AA07092	7120413	7129522	+	GO:0005525|	GTP binding|	-	-	-	-	-	At_S0004_7123455_1;At_S0004_7123455_2;At_S0004_7123455_3;	-
At04	At_S0004	p5	AATAAAATAAAATAAAATAAAATAA	7124371	GOBAR_AA07092	7120413	7129522	+	GO:0005525|	GTP binding|	-	-	-	-	-	At_S0004_7124371_1;At_S0004_7124371_2;At_S0004_7124371_3;	-
At04	At_S0004	p1	TTTTTTTTTTTTTTTTTTTTTTTTTT	7985604	GOBAR_AA20479	7981600	7992702	+	GO:0004672|GO:0005524|GO:0006468|GO:0005524|	protein kinase activity|ATP binding|protein phosphorylation|ATP binding|	-	-	-	At_S0004_7985604_1;At_S0004_7985604_2;At_S0004_7985604_3;	-	-	-
At04	At_S0004	p3	TTCTTCTTCTTCTTCTTC	8110239	GOBAR_AA35141	8110194	8112436	+	GO:0003824|GO:0008152|	catalytic activity|metabolic process|	ko00790|	Folate biosynthesis |	K00826	-	At_S0004_8110239_1;At_S0004_8110239_2;At_S0004_8110239_3;	-	-
At04	At_S0004	p2	TATATATATATATATATATATA	8508923	GOBAR_AA08206	8507437	8510479	+	GO:0005515|GO:0043531|	protein binding|ADP binding|	-	-	-	-	-	-	-
At04	At_S0004	p2	TGTGTGTGTGTGTGTGTGTG	8661203	GOBAR_AA13661	8660639	8666321	-	-	-	-	-	-	-	At_S0004_8661203_1;At_S0004_8661203_2;At_S0004_8661203_3;	-	-
At04	At_S0004	p2	GAGAGAGAGAGAGAGAGA	8662993	GOBAR_AA13661	8660639	8666321	-	-	-	-	-	-	-	At_S0004_8662993_1;At_S0004_8662993_2;At_S0004_8662993_3;	-	-
At04	At_S0004	p2	TGTGTGTGTGTGTGTGTGTG	8663804	GOBAR_AA13661	8660639	8666321	-	-	-	-	-	-	-	At_S0004_8663804_1;At_S0004_8663804_2;At_S0004_8663804_3;	-	-
At04	At_S0004	p6	AATTAGAATTAGAATTAG	9106306	GOBAR_AA29974	9106088	9107457	-	-	-	-	-	-	-	At_S0004_9106306_1;At_S0004_9106306_2;At_S0004_9106306_3;	-	-
At04	At_S0004	p3	ATAATAATAATAATAATAATA	9327865	GOBAR_AA03352	9319743	9330305	-	GO:0003824|GO:0016491|	catalytic activity|oxidoreductase activity|	-	-	K11517	-	-	-	-
At04	At_S0004	p5	AAGAAAAGAAAAGAAAAGAAAAGAA	9550582	GOBAR_AA03367	9546146	9550779	-	-	-	ko04120|	Ubiquitin mediated proteolysis |	K10580	-	At_S0004_9550582_1;At_S0004_9550582_2;At_S0004_9550582_3;	-	-
At04	At_S0004	p6	TAATTCTAATTCTAATTC	9755099	GOBAR_AA40647	9753970	9755339	+	-	-	-	-	-	-	At_S0004_9755099_1;At_S0004_9755099_2;At_S0004_9755099_3;	-	-
At04	At_S0004	p3	GAAGAAGAAGAAGAAGAAGAAGAAGAAGAAGAA	10773149	GOBAR_AA17639	10771979	10773523	-	GO:0006508|GO:0008234|GO:0008234|	proteolysis|cysteine-type peptidase activity|cysteine-type peptidase activity|	-	-	K01365	At_S0004_10773149_1;At_S0004_10773149_2;At_S0004_10773149_3;	-	-	-
At04	At_S0004	p2	ACACACACACACACACACACACACACAC	10852884	GOBAR_AA15268	10850009	10856254	-	GO:0004672|GO:0005524|GO:0006468|GO:0004672|GO:0006468|GO:0005515|	protein kinase activity|ATP binding|protein phosphorylation|protein kinase activity|protein phosphorylation|protein binding|	-	-	-	-	At_S0004_10852884_1;At_S0004_10852884_2;At_S0004_10852884_3;	-	-
At04	At_S0004	p6	TCCCCTTCCCCTTCCCCT	10933266	GOBAR_AA15271	10932040	10933746	+	-	-	-	-	-	At_S0004_10933266_1;At_S0004_10933266_3;	-	At_S0004_10933266_2;	-
At04	At_S0004	p2	AGAGAGAGAGAGAGAGAG	11997876	GOBAR_AA07635	11991945	11998171	-	GO:0005096|GO:0007021|GO:0007023|GO:0048487|GO:0005488|	GTPase activator activity|tubulin complex assembly|post-chaperonin tubulin folding pathway|beta-tubulin binding|binding|	-	-	-	-	At_S0004_11997876_1;At_S0004_11997876_2;At_S0004_11997876_3;	-	-
At04	At_S0004	p6	CTGTTCCTGTTCCTGTTC	12681790	GOBAR_AA00277	12680516	12684768	+	GO:0006511|GO:0036459|GO:0016579|GO:0036459|	ubiquitin-dependent protein catabolic process|thiol-dependent ubiquitinyl hydrolase activity|protein deubiquitination|thiol-dependent ubiquitinyl hydrolase activity|	-	-	-	-	At_S0004_12681790_1;At_S0004_12681790_2;At_S0004_12681790_3;	-	-
At04	At_S0004	p6	ACAGTTACAGTTACAGTT	12682322	GOBAR_AA00277	12680516	12684768	+	GO:0006511|GO:0036459|GO:0016579|GO:0036459|	ubiquitin-dependent protein catabolic process|thiol-dependent ubiquitinyl hydrolase activity|protein deubiquitination|thiol-dependent ubiquitinyl hydrolase activity|	-	-	-	At_S0004_12682322_1;At_S0004_12682322_2;At_S0004_12682322_3;	-	-	-
At04	At_S0004	p6	TATTTTTATTTTTATTTT	12682970	GOBAR_AA00277	12680516	12684768	+	GO:0006511|GO:0036459|GO:0016579|GO:0036459|	ubiquitin-dependent protein catabolic process|thiol-dependent ubiquitinyl hydrolase activity|protein deubiquitination|thiol-dependent ubiquitinyl hydrolase activity|	-	-	-	At_S0004_12682970_1;At_S0004_12682970_2;At_S0004_12682970_3;	-	-	-
At04	At_S0004	p6	AAAAATAAAAATAAAAAT	13115478	GOBAR_AA23542	13110433	13134611	-	GO:0005515|GO:0016491|GO:0055114|GO:0016702|GO:0046872|GO:0055114|	protein binding|oxidoreductase activity|oxidation-reduction process|oxidoreductase activity, acting on single donors with incorporation of molecular oxygen, incorporation of two atoms of oxygen|metal ion binding|oxidation-reduction process|	ko00591|	Linoleic acid metabolism |	K15718	-	At_S0004_13115478_1;At_S0004_13115478_2;At_S0004_13115478_3;	-	-
At04	At_S0004	p6	AAAAATAAAAATAAAAAT	13131599	GOBAR_AA23542	13110433	13134611	-	GO:0005515|GO:0016491|GO:0055114|GO:0016702|GO:0046872|GO:0055114|	protein binding|oxidoreductase activity|oxidation-reduction process|oxidoreductase activity, acting on single donors with incorporation of molecular oxygen, incorporation of two atoms of oxygen|metal ion binding|oxidation-reduction process|	ko00591|	Linoleic acid metabolism |	K15718	-	At_S0004_13131599_1;At_S0004_13131599_2;At_S0004_13131599_3;	-	-
At04	At_S0004	p6	TCTCCATCTCCATCTCCATCTCCA	14425675	GOBAR_AA16616	14425357	14426377	+	-	-	-	-	-	-	At_S0004_14425675_1;At_S0004_14425675_2;At_S0004_14425675_3;	-	-
At04	At_S0004	p1	TTTTTTTTTTTTTTTTTTTTT	15167183	GOBAR_AA32928	15159195	15175847	-	GO:0000902|	cell morphogenesis|	-	-	-	-	At_S0004_15167183_1;At_S0004_15167183_2;At_S0004_15167183_3;	-	-
At04	At_S0004	p5	TTAAATTAAATTAAATTAAA	15674699	GOBAR_AA02664	15673751	15676572	+	GO:0003735|GO:0005622|GO:0005840|GO:0006412|	structural constituent of ribosome|intracellular|ribosome|translation|	ko03010|	Ribosome |	K02934	-	At_S0004_15674699_1;At_S0004_15674699_2;At_S0004_15674699_3;	-	-
At04	At_S0004	p4	TTTATTTATTTATTTATTTATTTATTTA	18169437	GOBAR_AA39488	18162228	18171886	+	GO:0003735|GO:0005622|GO:0005840|GO:0006412|GO:0003735|GO:0005840|GO:0006412|	structural constituent of ribosome|intracellular|ribosome|translation|structural constituent of ribosome|ribosome|translation|	ko03010|	Ribosome |	K02948	-	-	-	At_S0004_18169437_1;At_S0004_18169437_2;At_S0004_18169437_3;
At04	At_S0004	p4	GTATGTATGTATGTATGTAT	21096287	GOBAR_AA16670	21092012	21097053	-	GO:0006812|GO:0008324|GO:0016021|GO:0055085|	cation transport|cation transmembrane transporter activity|integral component of membrane|transmembrane transport|	-	-	-	-	At_S0004_21096287_2;	At_S0004_21096287_1;At_S0004_21096287_3;	-
At04	At_S0004	p6	CTTCTACTTCTACTTCTA	22279433	GOBAR_AA34784	22278768	22280271	-	-	-	-	-	-	-	At_S0004_22279433_3;	At_S0004_22279433_1;At_S0004_22279433_2;	-
At04	At_S0004	p1	AAAAAAAAAAAAAAAAAAAAAAAAAAAAAAA	26359914	GOBAR_AA11085	26356352	26362002	-	-	-	-	-	-	At_S0004_26359914_1;At_S0004_26359914_2;At_S0004_26359914_3;	-	-	-
At04	At_S0004	p3	TAATAATAATAATAATAA	26803927	GOBAR_AA00679	26803057	26805470	-	GO:0001522|GO:0003723|GO:0009451|GO:0009982|	pseudouridine synthesis|RNA binding|RNA modification|pseudouridine synthase activity|	-	-	-	At_S0004_26803927_1;At_S0004_26803927_2;At_S0004_26803927_3;	-	-	-
At04	At_S0004	p4	AAATAAATAAATAAATAAATAAAT	29413156	GOBAR_AA14002	29406947	29413486	-	-	-	ko03018|	RNA degradation |	K12603	-	At_S0004_29413156_1;At_S0004_29413156_2;At_S0004_29413156_3;	-	-
At04	At_S0004	p6	TTTTGATTTTGATTTTGA	30507323	GOBAR_AA04288	30507051	30523998	+	-	-	-	-	-	-	At_S0004_30507323_1;At_S0004_30507323_2;At_S0004_30507323_3;	-	-
At04	At_S0004	p2	CTCTCTCTCTCTCTCTCT	30515925	GOBAR_AA04288	30507051	30523998	+	-	-	-	-	-	-	At_S0004_30515925_1;At_S0004_30515925_2;At_S0004_30515925_3;	-	-
At04	At_S0004	p3	TTATTATTATTATTATTATTA	30728492	GOBAR_AA04290	30722492	30731233	+	GO:0004386|	helicase activity|	ko03018|	RNA degradation |	K14442	-	At_S0004_30728492_1;At_S0004_30728492_2;At_S0004_30728492_3;	-	-
At04	At_S0004	p6	AATTATAATTATAATTAT	31672810	GOBAR_AA32553	31672506	31678514	+	GO:0000166|GO:0003676|	nucleotide binding|nucleic acid binding|	-	-	-	-	-	-	-
At04	At_S0004	p2	AGAGAGAGAGAGAGAGAGAGAG	33033392	GOBAR_AA22536	33018332	33039474	-	GO:0005515|GO:0006511|GO:0036459|GO:0016579|GO:0036459|	protein binding|ubiquitin-dependent protein catabolic process|thiol-dependent ubiquitinyl hydrolase activity|protein deubiquitination|thiol-dependent ubiquitinyl hydrolase activity|	ko04068|ko05203|ko05168|ko05169|	FoxO signaling pathway |Viral carcinogenesis |Herpes simplex infection |Epstein-Barr virus infection |	K11838	-	At_S0004_33033392_1;At_S0004_33033392_2;At_S0004_33033392_3;	-	-
At04	At_S0004	p2	AGAGAGAGAGAGAGAGAGAGAG	33035269	GOBAR_AA22536	33018332	33039474	-	GO:0005515|GO:0006511|GO:0036459|GO:0016579|GO:0036459|	protein binding|ubiquitin-dependent protein catabolic process|thiol-dependent ubiquitinyl hydrolase activity|protein deubiquitination|thiol-dependent ubiquitinyl hydrolase activity|	ko04068|ko05203|ko05168|ko05169|	FoxO signaling pathway |Viral carcinogenesis |Herpes simplex infection |Epstein-Barr virus infection |	K11838	-	At_S0004_33035269_1;At_S0004_33035269_2;At_S0004_33035269_3;	-	-
At04	At_S0004	p2	AGAGAGAGAGAGAGAGAGAGAG	33038202	GOBAR_AA22536	33018332	33039474	-	GO:0005515|GO:0006511|GO:0036459|GO:0016579|GO:0036459|	protein binding|ubiquitin-dependent protein catabolic process|thiol-dependent ubiquitinyl hydrolase activity|protein deubiquitination|thiol-dependent ubiquitinyl hydrolase activity|	ko04068|ko05203|ko05168|ko05169|	FoxO signaling pathway |Viral carcinogenesis |Herpes simplex infection |Epstein-Barr virus infection |	K11838	-	At_S0004_33038202_1;At_S0004_33038202_2;At_S0004_33038202_3;	-	-
At04	At_S0004	p6	AGGGGAAGGGGAAGGGGA	40489741	GOBAR_AA14157	40484799	40490583	-	-	-	-	-	-	At_S0004_40489741_1;At_S0004_40489741_2;At_S0004_40489741_3;	-	-	-
At04	At_S0004	p4	ATACATACATACATACATACATACATACATACATACATACATACATACATACATACATAC	42155788	GOBAR_AA33226	42154204	42156230	+	GO:0004553|GO:0005975|	hydrolase activity, hydrolyzing O-glycosyl compounds|carbohydrate metabolic process|	ko00052|ko00500|	Galactose metabolism |Starch and sucrose metabolism |	K01193	At_S0004_42155788_1;At_S0004_42155788_2;	At_S0004_42155788_3;	-	-
At04	At_S0004	p2	AGAGAGAGAGAGAGAGAGAGAG	45856922	GOBAR_AA25581	45853587	45860568	-	-	-	-	-	K06966	-	-	At_S0004_45856922_1;At_S0004_45856922_2;At_S0004_45856922_3;	-
At04	At_S0004	p2	AGAGAGAGAGAGAGAGAGAGAG	45858227	GOBAR_AA25581	45853587	45860568	-	-	-	-	-	K06966	-	-	At_S0004_45858227_1;At_S0004_45858227_2;At_S0004_45858227_3;	-
At04	At_S0004	p2	AGAGAGAGAGAGAGAGAGAGAG	45859600	GOBAR_AA25581	45853587	45860568	-	-	-	-	-	K06966	-	-	At_S0004_45859600_1;At_S0004_45859600_2;At_S0004_45859600_3;	-
At04	At_S0004	p3	TTATTATTATTATTATTATTA	46634738	GOBAR_AA32584	46633432	46639172	+	-	-	-	-	-	-	At_S0004_46634738_1;At_S0004_46634738_2;At_S0004_46634738_3;	-	-
At04	At_S0004	p3	AATAATAATAATAATAATAATAATAATAAT	47534909	GOBAR_AA31821	47531695	47535172	+	GO:0000166|GO:0003676|	nucleotide binding|nucleic acid binding|	-	-	-	At_S0004_47534909_1;At_S0004_47534909_2;At_S0004_47534909_3;	-	-	-
At04	At_S0004	p3	TTATTATTATTATTATTATTATTATTATTATTA	47866767	GOBAR_AA04667	47866330	47867189	+	GO:0005515|	protein binding|	-	-	K12129	-	At_S0004_47866767_1;At_S0004_47866767_2;At_S0004_47866767_3;	-	-
At04	At_S0004	p6	ATAATTATAATTATAATT	48282427	GOBAR_AA14350	48281633	48286126	-	-	-	-	-	-	-	-	-	-
At04	At_S0004	p1	TTTTTTTTTTTTTTTTTTTTTT	51298104	GOBAR_AA28144	51296146	51300826	+	GO:0003824|GO:0003824|GO:0005975|GO:0003824|GO:0005975|GO:0043169|GO:0003844|GO:0005978|GO:0004553|GO:0005975|GO:0005975|	catalytic activity|catalytic activity|carbohydrate metabolic process|catalytic activity|carbohydrate metabolic process|cation binding|1,4-alpha-glucan branching enzyme activity|glycogen biosynthetic process|hydrolase activity, hydrolyzing O-glycosyl compounds|carbohydrate metabolic process|carbohydrate metabolic process|	ko00500|	Starch and sucrose metabolism |	K00700	-	-	-	-
At04	At_S0004	p2	GAGAGAGAGAGAGAGAGA	53223075	GOBAR_AA23551	53220579	53225561	-	GO:0004794|GO:0009097|GO:0006520|GO:0030170|	L-threonine ammonia-lyase activity|isoleucine biosynthetic process|cellular amino acid metabolic process|pyridoxal phosphate binding|	ko01200|ko01230|ko00260|ko00290|	Carbon metabolism |Biosynthesis of amino acids |Glycine, serine and threonine metabolism |Valine, leucine and isoleucine biosynthesis |	K01754	At_S0004_53223075_1;At_S0004_53223075_2;At_S0004_53223075_3;	-	-	-
At04	At_S0004	p5	GTTTGGTTTGGTTTGGTTTG	56188872	GOBAR_AA33259	56188762	56190212	-	-	-	-	-	-	-	-	-	At_S0004_56188872_1;At_S0004_56188872_2;At_S0004_56188872_3;
At04	At_S0004	p1	CCCCCCCCCCCCCCCCCCC	56568700	GOBAR_AA27986	56562201	56578203	+	GO:0005515|	protein binding|	-	-	-	At_S0004_56568700_1;At_S0004_56568700_2;At_S0004_56568700_3;	-	-	-
At04	At_S0004	p3	AGAAGAAGAAGAAGAAGAAGAAGA	56653029	GOBAR_AA27987	56652788	56653783	+	GO:0003677|GO:0006355|GO:0043565|	DNA binding|regulation of transcription, DNA-templated|sequence-specific DNA binding|	-	-	-	At_S0004_56653029_1;At_S0004_56653029_2;At_S0004_56653029_3;	-	-	-
At04	At_S0004	p6	TCCTCTTCCTCTTCCTCT	57874491	GOBAR_AA30501	57874362	57875783	+	-	-	-	-	K03457	-	At_S0004_57874491_1;At_S0004_57874491_2;At_S0004_57874491_3;	-	-
At04	At_S0004	p3	CTCCTCCTCCTCCTCCTC	58116869	GOBAR_AA13723	58116692	58124347	+	GO:0003824|GO:0004356|GO:0006542|GO:0006807|GO:0004356|GO:0006807|GO:0016787|	catalytic activity|glutamate-ammonia ligase activity|glutamine biosynthetic process|nitrogen compound metabolic process|glutamate-ammonia ligase activity|nitrogen compound metabolic process|hydrolase activity|	-	-	-	-	At_S0004_58116869_1;At_S0004_58116869_2;At_S0004_58116869_3;	-	-
At04	At_S0004	p6	ATGTTTATGTTTATGTTT	59383641	GOBAR_AA04641	59383205	59385122	+	GO:0000166|GO:0003676|	nucleotide binding|nucleic acid binding|	ko05130|	Pathogenic Escherichia coli infection |	-	-	At_S0004_59383641_1;At_S0004_59383641_2;At_S0004_59383641_3;	-	-
At04	At_S0004	p3	AATAATAATAATAATAATAATAATAATAATAATAATAATAATAAT	59642545	GOBAR_AA27630	59640890	59642720	-	-	-	-	-	-	-	At_S0004_59642545_1;At_S0004_59642545_2;At_S0004_59642545_3;	-	-
At04	At_S0004	p4	ATTAATTAATTAATTAATTAATTA	60073098	GOBAR_AA01290	60071611	60073339	-	GO:0003676|GO:0046872|	nucleic acid binding|metal ion binding|	-	-	-	At_S0004_60073098_2;	At_S0004_60073098_1;At_S0004_60073098_3;	-	-
At04	At_S0004	p5	CAATACAATACAATACAATA	62261259	GOBAR_AA04518	62254856	62264854	-	-	-	-	-	-	-	-	-	At_S0004_62261259_1;At_S0004_62261259_2;At_S0004_62261259_3;
At04	At_S0004	p6	CTCATTCTCATTCTCATT	62361434	GOBAR_AA04521	62356239	62362541	+	-	-	-	-	-	-	At_S0004_62361434_1;At_S0004_62361434_2;At_S0004_62361434_3;	-	-
At04	At_S0004	p6	CCGTCGCCGTCGCCGTCG	62620152	GOBAR_AA04528	62620130	62622453	+	-	-	-	-	-	-	At_S0004_62620152_1;At_S0004_62620152_2;At_S0004_62620152_3;	-	-
At04	At_S0004	p6	CTAACCCTAACCCTAACC	62768057	GOBAR_AA20306	62767837	62768622	+	-	-	-	-	-	-	-	At_S0004_62768057_1;At_S0004_62768057_2;At_S0004_62768057_3;	-
At04	At_S0004	p6	ATATACATATACATATAC	64071728	GOBAR_AA26864	64071046	64072509	-	-	-	-	-	-	At_S0004_64071728_1;At_S0004_64071728_2;At_S0004_64071728_3;	-	-	-
At04	At_S0004	p3	TTGTTGTTGTTGTTGTTGTTGTTGTTG	64846705	GOBAR_AA38964	64841876	64852342	-	GO:0003676|GO:0015074|	nucleic acid binding|DNA integration|	-	-	-	-	-	-	At_S0004_64846705_1;At_S0004_64846705_2;At_S0004_64846705_3;
At04	At_S0004	p3	TTGTTGTTGTTGTTGTTGTTGTTGTTG	64848341	GOBAR_AA38964	64841876	64852342	-	GO:0003676|GO:0015074|	nucleic acid binding|DNA integration|	-	-	-	-	-	-	At_S0004_64848341_1;At_S0004_64848341_2;At_S0004_64848341_3;
At04	At_S0004	p3	CATCATCATCATCATCATCATCATCATCAT	65140687	GOBAR_AA37908	65140469	65140963	-	-	-	-	-	-	At_S0004_65140687_1;At_S0004_65140687_2;At_S0004_65140687_3;	-	-	-
At04	At_S0004	p2	TGTGTGTGTGTGTGTGTGTGTG	65870806	GOBAR_AA04887	65870278	65876210	+	GO:0003824|GO:0006561|GO:0055114|GO:0004349|GO:0006561|GO:0004350|GO:0006561|GO:0055114|GO:0005737|GO:0006561|GO:0006561|GO:0008152|GO:0016491|GO:0016620|GO:0055114|GO:0008152|GO:0016491|GO:0055114|	catalytic activity|proline biosynthetic process|oxidation-reduction process|glutamate 5-kinase activity|proline biosynthetic process|glutamate-5-semialdehyde dehydrogenase activity|proline biosynthetic process|oxidation-reduction process|cytoplasm|proline biosynthetic process|proline biosynthetic process|metabolic process|oxidoreductase activity|oxidoreductase activity, acting on the aldehyde or …	ko01230|ko00330|	Biosynthesis of amino acids |Arginine and proline metabolism |	K12657	-	At_S0004_65870806_1;At_S0004_65870806_2;At_S0004_65870806_3;	-	-
At04	At_S0004	p2	AGAGAGAGAGAGAGAGAGAGAGAG	66553724	GOBAR_AA03987	66553143	66554257	-	GO:0003700|GO:0006355|GO:0043565|	transcription factor activity, sequence-specific DNA binding|regulation of transcription, DNA-templated|sequence-specific DNA binding|	-	-	-	-	At_S0004_66553724_1;At_S0004_66553724_2;At_S0004_66553724_3;	-	-
At04	At_S0004	p4	AATAAATAAATAAATAAATA	67353494	GOBAR_AA27656	67349635	67355125	-	GO:0004672|GO:0005524|GO:0006468|GO:0004672|GO:0006468|GO:0005524|	protein kinase activity|ATP binding|protein phosphorylation|protein kinase activity|protein phosphorylation|ATP binding|	ko04150|ko04140|ko04139|ko04211|ko04212|	mTOR signaling pathway |Regulation of autophagy |Regulation of mitophagy - yeast |Longevity regulating pathway - mammal |Longevity regulating pathway - worm |	K08269	-	At_S0004_67353494_1;At_S0004_67353494_2;At_S0004_67353494_3;	-	-
At04	At_S0004	p5	TTTGATTTGATTTGATTTGA	67807042	GOBAR_AA01578	67806954	67811535	+	-	-	-	-	-	-	At_S0004_67807042_1;At_S0004_67807042_2;At_S0004_67807042_3;	-	-
At04	At_S0004	p3	AATAATAATAATAATAATAATAATAATAATAATAATAATAATAATAATAATAATAATAATAATAAT	68182148	GOBAR_AA01586	68178687	68182428	-	-	-	-	-	-	-	At_S0004_68182148_1;At_S0004_68182148_2;At_S0004_68182148_3;	-	-
At04	At_S0004	p5	TATTTTATTTTATTTTATTTTATTT	69206730	GOBAR_AA08227	69202948	69213074	-	GO:0003677|GO:0005515|GO:0008270|	DNA binding|protein binding|zinc ion binding|	-	-	K11649	-	-	At_S0004_69206730_2;At_S0004_69206730_3;	At_S0004_69206730_1;
At04	At_S0004	p5	TATTTTATTTTATTTTATTTTATTT	69207580	GOBAR_AA08227	69202948	69213074	-	GO:0003677|GO:0005515|GO:0008270|	DNA binding|protein binding|zinc ion binding|	-	-	K11649	-	-	At_S0004_69207580_2;At_S0004_69207580_3;	At_S0004_69207580_1;
At04	At_S0004	p5	TATTTTATTTTATTTTATTT	69211975	GOBAR_AA08227	69202948	69213074	-	GO:0003677|GO:0005515|GO:0008270|	DNA binding|protein binding|zinc ion binding|	-	-	K11649	At_S0004_69211975_1;At_S0004_69211975_2;At_S0004_69211975_3;	-	-	-
At04	At_S0004	p3	ATCATCATCATCATCATC	69226723	GOBAR_AA08224	69224061	69226818	-	-	-	-	-	-	At_S0004_69226723_1;At_S0004_69226723_2;At_S0004_69226723_3;	-	-	-
At04	At_S0004	p3	TATTATTATTATTATTATTATTATTAT	69249400	GOBAR_AA08222	69249004	69252325	-	GO:0006812|GO:0008324|GO:0016021|GO:0055085|GO:0006816|GO:0015369|GO:0016021|GO:0055085|	cation transport|cation transmembrane transporter activity|integral component of membrane|transmembrane transport|calcium ion transport|calcium:proton antiporter activity|integral component of membrane|transmembrane transport|	-	-	K07300	-	At_S0004_69249400_1;At_S0004_69249400_2;At_S0004_69249400_3;	-	-
At04	At_S0004	p2	CACACACACACACACACACACACACACACACA	69925289	GOBAR_AA02098	69924350	69933314	+	-	-	-	-	K07152	At_S0004_69925289_1;At_S0004_69925289_2;At_S0004_69925289_3;	-	-	-
At04	At_S0004	p3	TTATTATTATTATTATTA	71247401	GOBAR_AA14022	71246880	71247467	+	-	-	-	-	-	At_S0004_71247401_1;At_S0004_71247401_2;At_S0004_71247401_3;	-	-	-
At04	At_S0004	p2	AGAGAGAGAGAGAGAGAG	71300643	GOBAR_AA27372	71299378	71300842	-	-	-	-	-	-	-	At_S0004_71300643_2;At_S0004_71300643_3;	At_S0004_71300643_1;	-
At04	At_S0004	p2	TATATATATATATATATA	72021749	GOBAR_AA08003	72020713	72022193	-	GO:0006950|	response to stress|	-	-	-	-	At_S0004_72021749_1;At_S0004_72021749_2;At_S0004_72021749_3;	-	-
At04	At_S0004	p1	GGGGGGGGGGGGGGGGGGG	72936847	GOBAR_AA14438	72935154	72940545	-	-	-	-	-	-	At_S0004_72936847_1;At_S0004_72936847_2;At_S0004_72936847_3;	-	-	-
At04	At_S0004	p3	CAACAACAACAACAACAA	73220643	GOBAR_AA18551	73220313	73221806	-	-	-	-	-	-	-	At_S0004_73220643_1;At_S0004_73220643_2;At_S0004_73220643_3;	-	-
At04	At_S0004	p5	ATAAAATAAAATAAAATAAA	73221744	GOBAR_AA18551	73220313	73221806	-	-	-	-	-	-	At_S0004_73221744_1;At_S0004_73221744_2;At_S0004_73221744_3;	-	-	-
At04	At_S0004	p3	CACCACCACCACCACCACCACCAC	73473249	GOBAR_AA00741	73471972	73473345	-	-	-	-	-	-	-	At_S0004_73473249_1;At_S0004_73473249_2;At_S0004_73473249_3;	-	-
At04	At_S0004	p6	AATAAAAATAAAAATAAA	73939018	GOBAR_AA00758	73928877	73944234	-	GO:0004970|GO:0016020|	ionotropic glutamate receptor activity|membrane|	-	-	-	-	-	-	At_S0004_73939018_1;At_S0004_73939018_2;At_S0004_73939018_3;
At04	At_S0004	p5	ATAAAATAAAATAAAATAAA	73974794	GOBAR_AA00760	73974091	73975015	+	GO:0005506|GO:0016705|GO:0020037|GO:0055114|GO:0016705|GO:0055114|	iron ion binding|oxidoreductase activity, acting on paired donors, with incorporation or reduction of molecular oxygen|heme binding|oxidation-reduction process|oxidoreductase activity, acting on paired donors, with incorporation or reduction of molecular oxygen|oxidation-reduction process|	-	-	-	-	-	-	-
At04	At_S0004	p4	TAAATAAATAAATAAATAAA	74002349	GOBAR_AA00761	74001407	74004311	-	GO:0004144|GO:0004144|GO:0045017|	diacylglycerol O-acyltransferase activity|diacylglycerol O-acyltransferase activity|glycerolipid biosynthetic process|	-	-	-	-	-	-	-
At04	At_S0004	p2	TATATATATATATATATA	74181802	GOBAR_AA21766	74175272	74182003	+	GO:0004144|GO:0004144|GO:0045017|	diacylglycerol O-acyltransferase activity|diacylglycerol O-acyltransferase activity|glycerolipid biosynthetic process|	-	-	-	-	At_S0004_74181802_1;At_S0004_74181802_2;At_S0004_74181802_3;	-	-
At04	At_S0004	p2	CTCTCTCTCTCTCTCTCTCT	74517952	GOBAR_AA02302	74517699	74519310	+	GO:0006662|GO:0015035|GO:0045454|GO:0045454|	glycerol ether metabolic process|protein disulfide oxidoreductase activity|cell redox homeostasis|cell redox homeostasis|	-	-	-	At_S0004_74517952_1;At_S0004_74517952_2;At_S0004_74517952_3;	-	-	-
At04	At_S0004	p3	GCTGCTGCTGCTGCTGCTGCT	74685872	GOBAR_AA02314	74685237	74686205	-	GO:0003677|GO:0003700|GO:0006355|	DNA binding|transcription factor activity, sequence-specific DNA binding|regulation of transcription, DNA-templated|	-	-	-	-	At_S0004_74685872_1;At_S0004_74685872_2;At_S0004_74685872_3;	-	-
At04	At_S0004	p4	TTATTTATTTATTTATTTAT	74801783	GOBAR_AA02319	74800558	74806365	-	-	-	-	-	-	-	At_S0004_74801783_1;At_S0004_74801783_2;At_S0004_74801783_3;	-	-
At04	At_S0004	p4	ATTTATTTATTTATTTATTT	74802512	GOBAR_AA02319	74800558	74806365	-	-	-	-	-	-	At_S0004_74802512_1;At_S0004_74802512_2;At_S0004_74802512_3;	-	-	-
At04	At_S0004	p6	ACACATACACATACACATACACAT	75352868	GOBAR_AA17944	75350509	75353762	-	GO:0004618|GO:0006096|GO:0008152|GO:0016791|	phosphoglycerate kinase activity|glycolytic process|metabolic process|phosphatase activity|	-	-	K01079	-	-	-	At_S0004_75352868_1;At_S0004_75352868_2;At_S0004_75352868_3;
At04	At_S0004	p3	CTCCTCCTCCTCCTCCTCCTC	75493499	GOBAR_AA17949	75493165	75493593	+	-	-	-	-	-	-	At_S0004_75493499_1;At_S0004_75493499_2;At_S0004_75493499_3;	-	-
At04	At_S0004	p2	TATATATATATATATATATA	75596575	GOBAR_AA16914	75594939	75600252	+	GO:0004185|GO:0006508|	serine-type carboxypeptidase activity|proteolysis|	-	-	K13289	At_S0004_75596575_1;At_S0004_75596575_2;At_S0004_75596575_3;	-	-	-
At04	At_S0004	p3	TTATTATTATTATTATTA	75596867	GOBAR_AA16914	75594939	75600252	+	GO:0004185|GO:0006508|	serine-type carboxypeptidase activity|proteolysis|	-	-	K13289	At_S0004_75596867_2;At_S0004_75596867_3;	At_S0004_75596867_1;	-	-
At04	At_S0004	p2	ATATATATATATATATATAT	75670866	GOBAR_AA16921	75666659	75675580	-	GO:0004185|GO:0006508|	serine-type carboxypeptidase activity|proteolysis|	-	-	K13289	At_S0004_75670866_1;At_S0004_75670866_2;At_S0004_75670866_3;	-	-	-
At04	At_S0004	p4	ATGTATGTATGTATGTATGTATGTATGT	75706651	GOBAR_AA16922	75706345	75710002	-	GO:0004185|GO:0006508|	serine-type carboxypeptidase activity|proteolysis|	-	-	-	-	At_S0004_75706651_1;At_S0004_75706651_2;At_S0004_75706651_3;	-	-
At04	At_S0004	p5	TCTTTTCTTTTCTTTTCTTT	76028010	GOBAR_AA21762	76027560	76029123	+	GO:0006952|GO:0009607|	defense response|response to biotic stimulus|	-	-	-	-	At_S0004_76028010_1;At_S0004_76028010_2;	At_S0004_76028010_3;	-
At04	At_S0004	p5	TCTTTTCTTTTCTTTTCTTT	76028010	GOBAR_AA21761	76027560	76030598	+	GO:0006952|GO:0009607|	defense response|response to biotic stimulus|	-	-	-	-	At_S0004_76028010_1;At_S0004_76028010_2;	At_S0004_76028010_3;	-
At04	At_S0004	p5	TCTTTTCTTTTCTTTTCTTT	76029485	GOBAR_AA21761	76027560	76030598	+	GO:0006952|GO:0009607|	defense response|response to biotic stimulus|	-	-	-	-	At_S0004_76029485_1;At_S0004_76029485_2;	At_S0004_76029485_3;	-
At04	At_S0004	p3	ATCATCATCATCATCATCATC	76123120	GOBAR_AA21750	76117402	76124942	-	GO:0005515|GO:0008270|GO:0005524|GO:0046872|	protein binding|zinc ion binding|ATP binding|metal ion binding|	-	-	-	-	-	At_S0004_76123120_1;At_S0004_76123120_2;At_S0004_76123120_3;	-
At04	At_S0004	p6	TTTTGGTTTTGGTTTTGG	76445870	GOBAR_AA39733	76444501	76450680	-	-	-	-	-	-	-	-	At_S0004_76445870_1;At_S0004_76445870_2;At_S0004_76445870_3;	-
At04	At_S0004	p6	ATTTTTATTTTTATTTTTATTTTT	76565393	GOBAR_AA17830	76562163	76567890	-	GO:0004553|GO:0004553|GO:0005975|	hydrolase activity, hydrolyzing O-glycosyl compounds|hydrolase activity, hydrolyzing O-glycosyl compounds|carbohydrate metabolic process|	ko00500|ko00520|	Starch and sucrose metabolism |Amino sugar and nucleotide sugar metabolism |	-	At_S0004_76565393_1;At_S0004_76565393_2;At_S0004_76565393_3;	-	-	-
At04	At_S0004	p6	TTTTTCTTTTTCTTTTTC	76589139	GOBAR_AA17831	76586782	76593215	+	GO:0004672|GO:0005524|GO:0006468|GO:0004672|GO:0006468|GO:0005515|GO:0005524|GO:0019199|	protein kinase activity|ATP binding|protein phosphorylation|protein kinase activity|protein phosphorylation|protein binding|ATP binding|transmembrane receptor protein kinase activity|	ko04075|ko04626|	Plant hormone signal transduction |Plant-pathogen interaction |	K13416	At_S0004_76589139_1;At_S0004_76589139_2;At_S0004_76589139_3;	-	-	-
At04	At_S0004	p6	TTTATTTTTATTTTTATT	76675122	GOBAR_AA17838	76672262	76677438	+	-	-	-	-	-	-	At_S0004_76675122_1;At_S0004_76675122_2;At_S0004_76675122_3;	-	-
At04	At_S0004	p3	GACGACGACGACGACGAC	76675696	GOBAR_AA17838	76672262	76677438	+	-	-	-	-	-	-	At_S0004_76675696_1;At_S0004_76675696_2;At_S0004_76675696_3;	-	-
At04	At_S0004	p1	TTTTTTTTTTTTTTTTTT	76722860	GOBAR_AA18298	76720552	76728297	+	GO:0015079|GO:0016020|GO:0071805|	potassium ion transmembrane transporter activity|membrane|potassium ion transmembrane transport|	-	-	-	-	-	At_S0004_76722860_1;At_S0004_76722860_2;At_S0004_76722860_3;	-
At04	At_S0004	p3	CCGCCGCCGCCGCCGCCG	76735267	GOBAR_AA18300	76732360	76735317	-	GO:0009916|GO:0055114|	alternative oxidase activity|oxidation-reduction process|	-	-	K00540	-	At_S0004_76735267_1;At_S0004_76735267_2;At_S0004_76735267_3;	-	-
At04	At_S0004	p2	TATATATATATATATATATATATATATA	77013835	GOBAR_AA32987	77013045	77016266	+	GO:0008270|	zinc ion binding|	-	-	K09377	-	At_S0004_77013835_3;	-	At_S0004_77013835_1;At_S0004_77013835_2;
At04	At_S0004	p6	AAAAAGAAAAAGAAAAAG	77061044	GOBAR_AA32990	77046495	77063916	-	GO:0005515|	protein binding|	ko03040|	Spliceosome |	K12821	-	At_S0004_77061044_1;At_S0004_77061044_2;At_S0004_77061044_3;	-	-
At04	At_S0004	p5	GAAAAGAAAAGAAAAGAAAA	77085528	GOBAR_AA32992	77083681	77086409	-	-	-	-	-	-	At_S0004_77085528_1;At_S0004_77085528_2;At_S0004_77085528_3;	-	-	-
At04	At_S0004	p6	ATTTTTATTTTTATTTTT	77169793	GOBAR_AA21144	77167004	77170628	-	GO:0016972|GO:0055114|	thiol oxidase activity|oxidation-reduction process|	-	-	-	At_S0004_77169793_1;At_S0004_77169793_2;At_S0004_77169793_3;	-	-	-
At04	At_S0004	p6	TTGTTCTTGTTCTTGTTC	77289453	GOBAR_AA32266	77287320	77289783	-	GO:0005634|	nucleus|	-	-	K14505	At_S0004_77289453_2;At_S0004_77289453_3;	At_S0004_77289453_1;	-	-
At04	At_S0004	p3	TAATAATAATAATAATAATAATAA	77322305	GOBAR_AA32261	77321167	77322816	-	GO:0008171|	O-methyltransferase activity|	ko00360|ko00940|ko00945|ko00941|	Phenylalanine metabolism |Phenylpropanoid biosynthesis |Stilbenoid, diarylheptanoid and gingerol biosynthesis |Flavonoid biosynthesis |	K00588	At_S0004_77322305_1;At_S0004_77322305_2;At_S0004_77322305_3;	-	-	-
At04	At_S0004	p4	ATACATACATACATACATAC	77394896	GOBAR_AA21724	77394356	77396085	-	GO:0003677|	DNA binding|	-	-	-	-	At_S0004_77394896_1;At_S0004_77394896_2;At_S0004_77394896_3;	-	-
At04	At_S0004	p3	ATAATAATAATAATAATAATA	77894182	GOBAR_AA36869	77892004	77897568	-	-	-	-	-	-	At_S0004_77894182_1;At_S0004_77894182_2;At_S0004_77894182_3;	-	-	-
At04	At_S0004	p6	TTTTTGTTTTTGTTTTTG	77919320	GOBAR_AA36870	77911638	77921903	+	GO:0008152|GO:0016746|	metabolic process|transferase activity, transferring acyl groups|	ko00561|ko00564|	Glycerolipid metabolism |Glycerophospholipid metabolism |	K13506	At_S0004_77919320_1;At_S0004_77919320_2;At_S0004_77919320_3;	-	-	-
At04	At_S0004	p3	CATCATCATCATCATCATCAT	78038439	GOBAR_AA20970	78038026	78039375	-	-	-	-	-	-	At_S0004_78038439_2;At_S0004_78038439_3;	At_S0004_78038439_1;	-	-
At04	At_S0004	p6	TCCCGTTCCCGTTCCCGT	78038744	GOBAR_AA20970	78038026	78039375	-	-	-	-	-	-	-	At_S0004_78038744_1;At_S0004_78038744_2;At_S0004_78038744_3;	-	-
At04	At_S0004	p4	CATACATACATACATACATACATACATA	78136186	GOBAR_AA31130	78135574	78136290	+	GO:0005515|GO:0008270|	protein binding|zinc ion binding|	-	-	K11982	-	At_S0004_78136186_1;At_S0004_78136186_2;At_S0004_78136186_3;	-	-
At04	At_S0004	p6	AAAAATAAAAATAAAAAT	78140483	GOBAR_AA31129	78138109	78140959	-	-	-	-	-	-	-	At_S0004_78140483_1;At_S0004_78140483_2;At_S0004_78140483_3;	-	-
At04	At_S0004	p3	TCATCATCATCATCATCA	78354801	GOBAR_AA16980	78353218	78357590	-	-	-	-	-	-	-	At_S0004_78354801_1;At_S0004_78354801_2;At_S0004_78354801_3;	-	-
At04	At_S0004	p3	TCATCATCATCATCATCA	78356220	GOBAR_AA16980	78353218	78357590	-	-	-	-	-	-	-	At_S0004_78356220_1;At_S0004_78356220_2;At_S0004_78356220_3;	-	-
At04	At_S0004	p3	TTCTTCTTCTTCTTCTTC	78625219	GOBAR_AA14072	78625001	78626464	+	-	-	-	-	-	-	At_S0004_78625219_1;At_S0004_78625219_2;At_S0004_78625219_3;	-	-
At04	At_S0004	p6	GCTTCAGCTTCAGCTTCA	78861350	GOBAR_AA06309	78861109	78861741	-	GO:0003677|	DNA binding|	-	-	-	At_S0004_78861350_1;At_S0004_78861350_2;	-	At_S0004_78861350_3;	-
At04	At_S0004	p4	AATCAATCAATCAATCAATC	79101708	GOBAR_AA06343	79098505	79102403	-	GO:0015079|GO:0016020|GO:0071805|	potassium ion transmembrane transporter activity|membrane|potassium ion transmembrane transport|	-	-	-	-	At_S0004_79101708_1;At_S0004_79101708_2;At_S0004_79101708_3;	-	-
At04	At_S0004	p1	GGGGGGGGGGGGGGGGGG	79168347	GOBAR_AA28728	79161968	79170075	+	GO:0005643|GO:0016973|	nuclear pore|poly(A)+ mRNA export from nucleus|	-	-	-	-	At_S0004_79168347_1;At_S0004_79168347_2;At_S0004_79168347_3;	-	-
At04	At_S0004	p2	ATATATATATATATATATAT	79329301	GOBAR_AA10132	79327008	79335327	+	GO:0004553|GO:0005975|GO:0005975|	hydrolase activity, hydrolyzing O-glycosyl compounds|carbohydrate metabolic process|carbohydrate metabolic process|	-	-	-	At_S0004_79329301_1;At_S0004_79329301_2;At_S0004_79329301_3;	-	-	-
At04	At_S0004	p3	TTCTTCTTCTTCTTCTTCTTCTTC	79344774	GOBAR_AA10131	79343710	79346784	+	GO:0000166|GO:0003676|	nucleotide binding|nucleic acid binding|	ko03015|	mRNA surveillance pathway |	-	-	-	At_S0004_79344774_1;At_S0004_79344774_2;At_S0004_79344774_3;	-
At04	At_S0004	p1	AAAAAAAAAAAAAAAAAA	79500390	GOBAR_AA10115	79491735	79501418	-	GO:0006807|GO:0009039|GO:0016151|GO:0009039|GO:0016151|GO:0016151|GO:0043419|GO:0016787|GO:0016810|	nitrogen compound metabolic process|urease activity|nickel cation binding|urease activity|nickel cation binding|nickel cation binding|urea catabolic process|hydrolase activity|hydrolase activity, acting on carbon-nitrogen (but not peptide) bonds|	ko00230|ko00220|ko00791|	Purine metabolism |Arginine biosynthesis |Atrazine degradation |	K01427	At_S0004_79500390_1;At_S0004_79500390_2;At_S0004_79500390_3;	-	-	-
At04	At_S0004	p2	TGTGTGTGTGTGTGTGTGTGTG	79505230	GOBAR_AA10114	79504683	79507916	+	GO:0004175|GO:0005839|GO:0051603|GO:0004298|GO:0004298|GO:0005839|GO:0051603|	endopeptidase activity|proteasome core complex|proteolysis involved in cellular protein catabolic process|threonine-type endopeptidase activity|threonine-type endopeptidase activity|proteasome core complex|proteolysis involved in cellular protein catabolic process|	ko03050|	Proteasome |	K02737	At_S0004_79505230_1;At_S0004_79505230_2;At_S0004_79505230_3;	-	-	-
At04	At_S0004	p3	AACAACAACAACAACAAC	79575217	GOBAR_AA10104	79575122	79579143	+	-	-	-	-	-	-	-	At_S0004_79575217_1;At_S0004_79575217_2;At_S0004_79575217_3;	-
At04	At_S0004	p6	TACACATACACATACACA	79577787	GOBAR_AA10104	79575122	79579143	+	-	-	-	-	-	-	At_S0004_79577787_1;At_S0004_79577787_2;At_S0004_79577787_3;	-	-
At04	At_S0004	p6	TACACATACACATACACA	79579002	GOBAR_AA10104	79575122	79579143	+	-	-	-	-	-	-	At_S0004_79579002_1;At_S0004_79579002_2;At_S0004_79579002_3;	-	-
At04	At_S0004	p6	ATATCTATATCTATATCT	79691539	GOBAR_AA19877	79690971	79696189	-	GO:0008152|GO:0016491|	metabolic process|oxidoreductase activity|	-	-	-	-	-	At_S0004_79691539_2;At_S0004_79691539_3;	At_S0004_79691539_1;
At04	At_S0004	p6	CTGTTGCTGTTGCTGTTG	79699405	GOBAR_AA19878	79697952	79699521	-	-	-	-	-	-	-	At_S0004_79699405_1;At_S0004_79699405_2;At_S0004_79699405_3;	-	-
At04	At_S0004	p4	GTATGTATGTATGTATGTATGTATGTATGTATGTAT	79735174	GOBAR_AA19883	79731592	79737689	+	GO:0004185|GO:0006508|	serine-type carboxypeptidase activity|proteolysis|	-	-	K09645	At_S0004_79735174_1;At_S0004_79735174_3;	At_S0004_79735174_2;	-	-
At04	At_S0004	p6	ATTTTTATTTTTATTTTT	79767663	GOBAR_AA19887	79767114	79770140	-	-	-	ko00073|	Cutin, suberine and wax biosynthesis |	-	At_S0004_79767663_1;At_S0004_79767663_2;At_S0004_79767663_3;	-	-	-
At04	At_S0004	p3	TATTATTATTATTATTAT	79786182	GOBAR_AA19889	79781984	79786723	+	-	-	-	-	-	-	-	At_S0004_79786182_1;At_S0004_79786182_2;At_S0004_79786182_3;	-
At04	At_S0004	p2	TCTCTCTCTCTCTCTCTCTCTCTCTCTC	79812336	GOBAR_AA19893	79808018	79816224	-	-	-	-	-	K13148	-	-	At_S0004_79812336_1;At_S0004_79812336_2;At_S0004_79812336_3;	-
At04	At_S0004	p2	TCTCTCTCTCTCTCTCTCTCTCTCTCTC	79813384	GOBAR_AA19893	79808018	79816224	-	-	-	-	-	K13148	-	-	At_S0004_79813384_1;At_S0004_79813384_2;At_S0004_79813384_3;	-
At04	At_S0004	p2	ATATATATATATATATAT	80022537	GOBAR_AA19244	80021159	80024914	+	GO:0003824|GO:0006281|GO:0006284|GO:0008725|	catalytic activity|DNA repair|base-excision repair|DNA-3-methyladenine glycosylase activity|	ko03410|	Base excision repair |	K01246	-	-	-	-
At04	At_S0004	p2	TATATATATATATATATA	80070478	GOBAR_AA24923	80062457	80072285	-	GO:0003677|GO:0046983|GO:0003700|GO:0005634|GO:0006355|	DNA binding|protein dimerization activity|transcription factor activity, sequence-specific DNA binding|nucleus|regulation of transcription, DNA-templated|	-	-	K09264	-	At_S0004_80070478_1;At_S0004_80070478_2;At_S0004_80070478_3;	-	-
At04	At_S0004	p6	TTTATTTTTATTTTTATT	80145823	GOBAR_AA24930	80141436	80147337	+	GO:0005515|	protein binding|	-	-	K12176	-	At_S0004_80145823_1;At_S0004_80145823_2;At_S0004_80145823_3;	-	-
At04	At_S0004	p1	TTTTTTTTTTTTTTTTTTT	80249734	GOBAR_AA29140	80239348	80252579	+	GO:0000148|GO:0003843|GO:0006075|GO:0016020|	1,3-beta-D-glucan synthase complex|1,3-beta-D-glucan synthase activity|(1->3)-beta-D-glucan biosynthetic process|membrane|	-	-	K11000	-	At_S0004_80249734_1;At_S0004_80249734_2;At_S0004_80249734_3;	-	-
At05	At_S0037	p6	AAGAAAAAGAAAAAGAAA	26611	GOBAR_AA01095	24047	26802	-	GO:0005515|	protein binding|	-	-	-	-	At_S0037_26611_1;At_S0037_26611_2;At_S0037_26611_3;	-	-
At05	At_S0496	p5	AGGCTAGGCTAGGCTAGGCT	27228	GOBAR_AA19427	25017	29746	-	GO:0003824|GO:0050662|	catalytic activity|coenzyme binding|	-	-	-	-	At_S0496_27228_1;At_S0496_27228_2;At_S0496_27228_3;	-	-
At05	At_S0037	p2	ATATATATATATATATAT	69661	GOBAR_AA01096	68744	70851	-	GO:0003677|GO:0003700|GO:0006355|GO:0003700|GO:0006355|GO:0007275|	DNA binding|transcription factor activity, sequence-specific DNA binding|regulation of transcription, DNA-templated|transcription factor activity, sequence-specific DNA binding|regulation of transcription, DNA-templated|multicellular organism development|	-	-	-	At_S0037_69661_1;At_S0037_69661_2;At_S0037_69661_3;	-	-	-
At05	At_S0037	p6	GTAGCAGTAGCAGTAGCA	70670	GOBAR_AA01096	68744	70851	-	GO:0003677|GO:0003700|GO:0006355|GO:0003700|GO:0006355|GO:0007275|	DNA binding|transcription factor activity, sequence-specific DNA binding|regulation of transcription, DNA-templated|transcription factor activity, sequence-specific DNA binding|regulation of transcription, DNA-templated|multicellular organism development|	-	-	-	At_S0037_70670_1;At_S0037_70670_2;At_S0037_70670_3;	-	-	-
At05	At_S0489	p6	TTTTATTTTTATTTTTAT	86398	GOBAR_AA18982	79537	90878	+	GO:0016702|GO:0055114|	oxidoreductase activity, acting on single donors with incorporation of molecular oxygen, incorporation of two atoms of oxygen|oxidation-reduction process|	ko00430|	Taurine and hypotaurine metabolism |	K10712	-	At_S0489_86398_1;At_S0489_86398_2;At_S0489_86398_3;	-	-
At05	At_S0489	p3	TTATTATTATTATTATTA	87750	GOBAR_AA18982	79537	90878	+	GO:0016702|GO:0055114|	oxidoreductase activity, acting on single donors with incorporation of molecular oxygen, incorporation of two atoms of oxygen|oxidation-reduction process|	ko00430|	Taurine and hypotaurine metabolism |	K10712	At_S0489_87750_1;At_S0489_87750_2;At_S0489_87750_3;	-	-	-
At05	At_S0005	p6	CGTCATCGTCATCGTCAT	121134	GOBAR_AA28017	121150	123607	+	GO:0004672|GO:0005524|GO:0006468|GO:0005515|	protein kinase activity|ATP binding|protein phosphorylation|protein binding|	-	-	-	At_S0005_121134_1;At_S0005_121134_2;At_S0005_121134_3;	-	-	-
At05	At_S0005	p6	CAAGGTCAAGGTCAAGGT	277055	GOBAR_AA27264	276543	278135	-	GO:0004335|GO:0005524|GO:0006012|GO:0046835|GO:0005524|GO:0005524|GO:0005737|GO:0008152|GO:0016301|GO:0016773|	galactokinase activity|ATP binding|galactose metabolic process|carbohydrate phosphorylation|ATP binding|ATP binding|cytoplasm|metabolic process|kinase activity|phosphotransferase activity, alcohol group as acceptor|	ko00520|	Amino sugar and nucleotide sugar metabolism |	K00849	-	-	At_S0005_277055_1;At_S0005_277055_2;At_S0005_277055_3;	-
At05	At_S0005	p6	GGAGGCGGAGGCGGAGGC	315471	GOBAR_AA27268	314004	315744	+	GO:0005515|	protein binding|	-	-	-	-	At_S0005_315471_1;At_S0005_315471_2;At_S0005_315471_3;	-	-
At05	At_S0005	p6	ATTTTTATTTTTATTTTT	323091	GOBAR_AA27270	322982	325764	+	GO:0005543|GO:0005545|GO:0030136|GO:0030276|GO:0048268|	phospholipid binding|1-phosphatidylinositol binding|clathrin-coated vesicle|clathrin binding|clathrin coat assembly|	-	-	-	At_S0005_323091_1;At_S0005_323091_2;At_S0005_323091_3;	-	-	-
At05	At_S0005	p6	GGATATGGATATGGATAT	325495	GOBAR_AA27270	322982	325764	+	GO:0005543|GO:0005545|GO:0030136|GO:0030276|GO:0048268|	phospholipid binding|1-phosphatidylinositol binding|clathrin-coated vesicle|clathrin binding|clathrin coat assembly|	-	-	-	-	-	At_S0005_325495_1;At_S0005_325495_2;At_S0005_325495_3;	-
At05	At_S0005	p6	TCCATATCCATATCCATA	350359	GOBAR_AA27273	342567	350666	-	GO:0005543|GO:0005545|GO:0030136|GO:0030276|GO:0048268|	phospholipid binding|1-phosphatidylinositol binding|clathrin-coated vesicle|clathrin binding|clathrin coat assembly|	-	-	-	At_S0005_350359_1;At_S0005_350359_2;At_S0005_350359_3;	-	-	-
At05	At_S0005	p3	ATTATTATTATTATTATT	414251	GOBAR_AA36541	411112	417288	-	GO:0000166|GO:0000166|GO:0046872|GO:0006812|GO:0016021|GO:0019829|GO:0016021|GO:0030001|GO:0046872|	nucleotide binding|nucleotide binding|metal ion binding|cation transport|integral component of membrane|cation-transporting ATPase activity|integral component of membrane|metal ion transport|metal ion binding|	-	-	K01534	At_S0005_414251_1;At_S0005_414251_2;At_S0005_414251_3;	-	-	-
At05	At_S0005	p6	ATCAATATCAATATCAAT	424533	GOBAR_AA36542	423425	424719	-	GO:0003723|GO:0005622|GO:0019843|	RNA binding|intracellular|rRNA binding|	ko03008|	Ribosome biogenesis in eukaryotes |	K14560	-	-	At_S0005_424533_1;At_S0005_424533_2;At_S0005_424533_3;	-
At05	At_S0070	p6	ATAATTATAATTATAATT	447475	GOBAR_AA02461	447218	450336	+	GO:0004672|GO:0005524|GO:0006468|GO:0004672|GO:0006468|GO:0005524|GO:0030246|	protein kinase activity|ATP binding|protein phosphorylation|protein kinase activity|protein phosphorylation|ATP binding|carbohydrate binding|	-	-	-	At_S0070_447475_1;At_S0070_447475_2;At_S0070_447475_3;	-	-	-
At05	At_S0062	p6	GAGCAGGAGCAGGAGCAGGAGCAG	467513	GOBAR_AA02165	467066	468500	+	GO:0003677|	DNA binding|	-	-	-	-	At_S0062_467513_1;At_S0062_467513_2;At_S0062_467513_3;	-	-
At05	At_S0005	p2	ATATATATATATATATAT	506140	GOBAR_AA31486	504590	507014	+	GO:0000160|GO:0003677|	phosphorelay signal transduction system|DNA binding|	ko04075|	Plant hormone signal transduction |	K14491	-	At_S0005_506140_1;At_S0005_506140_2;At_S0005_506140_3;	-	-
At05	At_S0005	p6	AAATGTAAATGTAAATGT	525047	GOBAR_AA31490	519680	526522	-	GO:0003824|GO:0008152|	catalytic activity|metabolic process|	ko00360|ko00130|ko00940|	Phenylalanine metabolism |Ubiquinone and other terpenoid-quinone biosynthesis |Phenylpropanoid biosynthesis |	K01904	-	-	At_S0005_525047_1;At_S0005_525047_2;At_S0005_525047_3;	-
At05	At_S0005	p1	TTTTTTTTTTTTTTTTTT	549240	GOBAR_AA31492	545406	552476	+	GO:0003958|GO:0055114|GO:0005506|GO:0010181|GO:0055114|GO:0010181|GO:0016491|GO:0055114|	NADPH-hemoprotein reductase activity|oxidation-reduction process|iron ion binding|FMN binding|oxidation-reduction process|FMN binding|oxidoreductase activity|oxidation-reduction process|	-	-	K00327	-	At_S0005_549240_1;At_S0005_549240_2;At_S0005_549240_3;	-	-
At05	At_S0005	p1	TTTTTTTTTTTTTTTTTTTTTTTTTT	550823	GOBAR_AA31492	545406	552476	+	GO:0003958|GO:0055114|GO:0005506|GO:0010181|GO:0055114|GO:0010181|GO:0016491|GO:0055114|	NADPH-hemoprotein reductase activity|oxidation-reduction process|iron ion binding|FMN binding|oxidation-reduction process|FMN binding|oxidoreductase activity|oxidation-reduction process|	-	-	K00327	-	-	-	-
At05	At_S0005	p5	TTTTATTTTATTTTATTTTA	601589	GOBAR_AA24009	596773	601987	+	GO:0003677|GO:0005634|GO:0006260|GO:0006281|GO:0006310|	DNA binding|nucleus|DNA replication|DNA repair|DNA recombination|	ko03030|ko03420|ko03430|ko03440|ko03460|	DNA replication |Nucleotide excision repair |Mismatch repair |Homologous recombination |Fanconi anemia pathway |	K10739	-	At_S0005_601589_1;At_S0005_601589_2;At_S0005_601589_3;	-	-
At05	At_S0005	p2	CTCTCTCTCTCTCTCTCT	617919	GOBAR_AA24010	616216	619731	+	GO:0005515|	protein binding|	-	-	-	At_S0005_617919_1;At_S0005_617919_2;	At_S0005_617919_3;	-	-
At05	At_S0005	p2	AGAGAGAGAGAGAGAGAGAG	743572	GOBAR_AA24022	741856	743776	-	GO:0005506|GO:0016226|GO:0051536|	iron ion binding|iron-sulfur cluster assembly|iron-sulfur cluster binding|	-	-	-	-	At_S0005_743572_1;At_S0005_743572_2;At_S0005_743572_3;	-	-
At05	At_S0005	p1	TTTTTTTTTTTTTTTTTT	871606	GOBAR_AA35407	870586	874522	+	GO:0015031|GO:0016020|	protein transport|membrane|	ko03060|ko04141|ko04145|ko05110|	Protein export |Protein processing in endoplasmic reticulum |Phagosome |Vibrio cholerae infection |	K10956	At_S0005_871606_1;At_S0005_871606_2;At_S0005_871606_3;	-	-	-
At05	At_S0005	p3	AGAAGAAGAAGAAGAAGA	883169	GOBAR_AA35409	882305	883231	-	-	-	-	-	-	-	At_S0005_883169_1;At_S0005_883169_2;At_S0005_883169_3;	-	-
At05	At_S0005	p6	CCATACCCATACCCATACCCATAC	910184	GOBAR_AA35414	906727	911762	-	-	-	-	-	-	-	At_S0005_910184_1;At_S0005_910184_3;	At_S0005_910184_2;	-
At05	At_S0005	p4	CATACATACATACATACATA	914827	GOBAR_AA35416	914395	917380	-	GO:0004672|GO:0005524|GO:0006468|GO:0004672|GO:0006468|GO:0005515|GO:0005524|	protein kinase activity|ATP binding|protein phosphorylation|protein kinase activity|protein phosphorylation|protein binding|ATP binding|	-	-	-	At_S0005_914827_1;At_S0005_914827_2;At_S0005_914827_3;	-	-	-
At05	At_S0005	p1	CCCCCCCCCCCCCCCCCCCCCCCC	1036881	GOBAR_AA25285	1034422	1038373	+	GO:0055085|	transmembrane transport|	-	-	-	-	At_S0005_1036881_1;At_S0005_1036881_2;At_S0005_1036881_3;	-	-
At05	At_S0005	p6	CCAGCTCCAGCTCCAGCTCCAGCTCCAGCT	1243692	GOBAR_AA28343	1241738	1245008	+	GO:0005515|GO:0008270|GO:0008270|	protein binding|zinc ion binding|zinc ion binding|	-	-	-	At_S0005_1243692_1;At_S0005_1243692_2;At_S0005_1243692_3;	-	-	-
At05	At_S0005	p6	CCAGCTCCAGCTCCAGCTCCAGCTCCAGCT	1244698	GOBAR_AA28343	1241738	1245008	+	GO:0005515|GO:0008270|GO:0008270|	protein binding|zinc ion binding|zinc ion binding|	-	-	-	-	At_S0005_1244698_1;At_S0005_1244698_2;At_S0005_1244698_3;	-	-
At05	At_S0005	p3	TGATGATGATGATGATGATGA	1255110	GOBAR_AA28342	1250913	1255683	+	GO:0005634|GO:0006351|GO:0008270|GO:0006351|	nucleus|transcription, DNA-templated|zinc ion binding|transcription, DNA-templated|	-	-	-	-	At_S0005_1255110_1;At_S0005_1255110_2;At_S0005_1255110_3;	-	-
At05	At_S0005	p3	ATCATCATCATCATCATCATCATCATCATCATCATCATC	1334979	GOBAR_AA27729	1333958	1336442	-	GO:0003824|GO:0030151|GO:0030170|GO:0005515|	catalytic activity|molybdenum ion binding|pyridoxal phosphate binding|protein binding|	-	-	-	-	-	At_S0005_1334979_1;At_S0005_1334979_2;At_S0005_1334979_3;	-
At05	At_S0005	p2	TATATATATATATATATA	1511499	GOBAR_AA36342	1511408	1512284	-	GO:0006810|GO:0016021|GO:0016192|	transport|integral component of membrane|vesicle-mediated transport|	ko04130|	SNARE interactions in vesicular transport |	K08515	At_S0005_1511499_1;At_S0005_1511499_2;At_S0005_1511499_3;	-	-	-
At05	At_S0005	p5	CTTTTCTTTTCTTTTCTTTTCTTTT	1610515	GOBAR_AA33856	1608851	1611910	+	GO:0007275|	multicellular organism development|	-	-	-	-	-	-	At_S0005_1610515_1;At_S0005_1610515_2;At_S0005_1610515_3;
At05	At_S0005	p5	CTTTTCTTTTCTTTTCTTTTCTTTT	1611157	GOBAR_AA33856	1608851	1611910	+	GO:0007275|	multicellular organism development|	-	-	-	-	-	-	At_S0005_1611157_1;At_S0005_1611157_2;At_S0005_1611157_3;
At05	At_S0005	p6	ATATTTATATTTATATTT	1684310	GOBAR_AA31394	1681165	1685116	-	-	-	-	-	-	At_S0005_1684310_1;At_S0005_1684310_2;At_S0005_1684310_3;	-	-	-
At05	At_S0005	p2	TGTGTGTGTGTGTGTGTGTGTGTGTGTG	1985511	GOBAR_AA18832	1984378	1985934	+	-	-	-	-	-	-	At_S0005_1985511_1;At_S0005_1985511_2;At_S0005_1985511_3;	-	-
At05	At_S0005	p3	GAAGAAGAAGAAGAAGAAGAA	1988400	GOBAR_AA18831	1986702	1990051	-	GO:0016787|	hydrolase activity|	ko00564|	Glycerophospholipid metabolism |	K06130	-	At_S0005_1988400_1;At_S0005_1988400_2;At_S0005_1988400_3;	-	-
At05	At_S0005	p4	CTCCCTCCCTCCCTCCCTCC	2058361	GOBAR_AA18822	2055938	2060795	+	GO:0005515|	protein binding|	ko03013|	RNA transport |	K13137	-	-	At_S0005_2058361_1;At_S0005_2058361_2;At_S0005_2058361_3;	-
At05	At_S0005	p3	TGATGATGATGATGATGATGA	2081730	GOBAR_AA18816	2081297	2084976	-	GO:0005515|	protein binding|	-	-	-	-	At_S0005_2081730_1;At_S0005_2081730_2;At_S0005_2081730_3;	-	-
At05	At_S0005	p2	TGTGTGTGTGTGTGTGTGTGTG	2241147	GOBAR_AA34688	2231575	2246819	+	GO:0005488|	binding|	-	-	K09533	-	At_S0005_2241147_1;At_S0005_2241147_2;At_S0005_2241147_3;	-	-
At05	At_S0005	p2	TGTGTGTGTGTGTGTGTGTGTG	2331443	GOBAR_AA23530	2330265	2333924	+	GO:0000166|GO:0005524|GO:0005737|GO:0008033|GO:0016879|	nucleotide binding|ATP binding|cytoplasm|tRNA processing|ligase activity, forming carbon-nitrogen bonds|	-	-	-	-	At_S0005_2331443_1;At_S0005_2331443_2;At_S0005_2331443_3;	-	-
At05	At_S0005	p2	CTCTCTCTCTCTCTCTCTCT	2614868	GOBAR_AA11022	2614586	2616702	+	GO:0046983|	protein dimerization activity|	-	-	-	At_S0005_2614868_1;At_S0005_2614868_2;At_S0005_2614868_3;	-	-	-
At05	At_S0005	p3	TTATTATTATTATTATTA	2713482	GOBAR_AA11026	2712883	2719584	+	GO:0005215|GO:0016021|GO:0055085|GO:0016020|GO:0022891|GO:0055085|GO:0016021|GO:0022857|GO:0055085|	transporter activity|integral component of membrane|transmembrane transport|membrane|substrate-specific transmembrane transporter activity|transmembrane transport|integral component of membrane|transmembrane transporter activity|transmembrane transport|	-	-	-	At_S0005_2713482_1;At_S0005_2713482_2;At_S0005_2713482_3;	-	-	-
At05	At_S0005	p2	AGAGAGAGAGAGAGAGAGAGAG	2842672	GOBAR_AA32530	2840261	2847316	+	GO:0004672|GO:0005524|GO:0006468|GO:0004672|GO:0006468|GO:0005524|	protein kinase activity|ATP binding|protein phosphorylation|protein kinase activity|protein phosphorylation|ATP binding|	-	-	-	-	At_S0005_2842672_1;At_S0005_2842672_2;At_S0005_2842672_3;	-	-
At05	At_S0005	p2	AGAGAGAGAGAGAGAGAGAGAG	2843841	GOBAR_AA32530	2840261	2847316	+	GO:0004672|GO:0005524|GO:0006468|GO:0004672|GO:0006468|GO:0005524|	protein kinase activity|ATP binding|protein phosphorylation|protein kinase activity|protein phosphorylation|ATP binding|	-	-	-	-	At_S0005_2843841_1;At_S0005_2843841_2;At_S0005_2843841_3;	-	-
At05	At_S0005	p6	CTTCCGCTTCCGCTTCCGCTTCCGCTTCCG	2931327	GOBAR_AA28267	2931101	2935704	+	-	-	-	-	-	-	At_S0005_2931327_1;At_S0005_2931327_2;At_S0005_2931327_3;	-	-
At05	At_S0005	p6	AAAATTAAAATTAAAATT	2950624	GOBAR_AA28270	2949473	2952287	-	GO:0003700|GO:0006355|GO:0008270|GO:0043565|GO:0006355|GO:0008270|	transcription factor activity, sequence-specific DNA binding|regulation of transcription, DNA-templated|zinc ion binding|sequence-specific DNA binding|regulation of transcription, DNA-templated|zinc ion binding|	-	-	-	-	-	-	-
At05	At_S0005	p4	TGTTTGTTTGTTTGTTTGTT	3096373	GOBAR_AA29713	3089002	3099165	+	-	-	-	-	-	At_S0005_3096373_1;At_S0005_3096373_2;At_S0005_3096373_3;	-	-	-
At05	At_S0005	p2	CTCTCTCTCTCTCTCTCT	3165518	GOBAR_AA26325	3163573	3168567	+	GO:0000166|GO:0004812|GO:0005524|GO:0006418|GO:0000166|GO:0004814|GO:0005524|GO:0005737|GO:0006420|GO:0004814|GO:0005524|GO:0006420|	nucleotide binding|aminoacyl-tRNA ligase activity|ATP binding|tRNA aminoacylation for protein translation|nucleotide binding|arginine-tRNA ligase activity|ATP binding|cytoplasm|arginyl-tRNA aminoacylation|arginine-tRNA ligase activity|ATP binding|arginyl-tRNA aminoacylation|	ko00970|	Aminoacyl-tRNA biosynthesis |	K01887	-	-	At_S0005_3165518_1;At_S0005_3165518_2;At_S0005_3165518_3;	-
At05	At_S0005	p1	TTTTTTTTTTTTTTTTTTT	3185689	GOBAR_AA26322	3185229	3186611	-	GO:0003779|	actin binding|	ko04015|ko04810|ko05132|ko05131|	Rap1 signaling pathway |Regulation of actin cytoskeleton |Salmonella infection |Shigellosis |	K05759	-	-	At_S0005_3185689_1;At_S0005_3185689_2;At_S0005_3185689_3;	-
At05	At_S0005	p5	TGACCTGACCTGACCTGACC	3199431	GOBAR_AA26320	3198449	3200568	+	-	-	-	-	-	-	-	At_S0005_3199431_1;At_S0005_3199431_2;At_S0005_3199431_3;	-
At05	At_S0005	p2	TATATATATATATATATA	3226012	GOBAR_AA26317	3225306	3231290	-	GO:0003677|GO:0006355|	DNA binding|regulation of transcription, DNA-templated|	-	-	-	At_S0005_3226012_1;At_S0005_3226012_2;At_S0005_3226012_3;	-	-	-
At05	At_S0005	p3	GATGATGATGATGATGAT	3227188	GOBAR_AA26317	3225306	3231290	-	GO:0003677|GO:0006355|	DNA binding|regulation of transcription, DNA-templated|	-	-	-	-	-	At_S0005_3227188_1;At_S0005_3227188_2;At_S0005_3227188_3;	-
At05	At_S0005	p5	TATGATATGATATGATATGATATGA	3274663	GOBAR_AA38199	3271111	3274976	+	-	-	-	-	-	-	-	At_S0005_3274663_1;At_S0005_3274663_2;At_S0005_3274663_3;	-
At05	At_S0005	p3	AGAAGAAGAAGAAGAAGAAGAAGAAGAAGAAGAAGAAGAAGA	3426598	GOBAR_AA32937	3425383	3426867	-	GO:0003824|GO:0003824|GO:0008152|	catalytic activity|catalytic activity|metabolic process|	-	-	-	-	At_S0005_3426598_1;At_S0005_3426598_2;At_S0005_3426598_3;	-	-
At05	At_S0005	p3	GAAGAAGAAGAAGAAGAA	3440095	GOBAR_AA32938	3439029	3440216	-	GO:0003700|GO:0006355|GO:0008270|GO:0043565|GO:0006355|GO:0008270|	transcription factor activity, sequence-specific DNA binding|regulation of transcription, DNA-templated|zinc ion binding|sequence-specific DNA binding|regulation of transcription, DNA-templated|zinc ion binding|	-	-	-	-	At_S0005_3440095_1;At_S0005_3440095_2;At_S0005_3440095_3;	-	-
At05	At_S0005	p3	AATAATAATAATAATAATAAT	3465573	GOBAR_AA32940	3461013	3466131	-	GO:0005515|	protein binding|	-	-	K10752	-	At_S0005_3465573_1;At_S0005_3465573_2;At_S0005_3465573_3;	-	-
At05	At_S0005	p6	TAAAAATAAAAATAAAAA	3523059	GOBAR_AA30154	3522926	3526809	-	-	-	-	-	-	-	-	At_S0005_3523059_1;At_S0005_3523059_2;At_S0005_3523059_3;	-
At05	At_S0005	p2	ATATATATATATATATAT	3538880	GOBAR_AA30152	3534868	3553568	-	GO:0003774|GO:0005524|GO:0016459|GO:0005515|	motor activity|ATP binding|myosin complex|protein binding|	-	-	-	-	At_S0005_3538880_1;At_S0005_3538880_2;At_S0005_3538880_3;	-	-
At05	At_S0005	p3	TGGTGGTGGTGGTGGTGG	3581670	GOBAR_AA30149	3581166	3582998	-	-	-	-	-	-	-	At_S0005_3581670_1;At_S0005_3581670_2;At_S0005_3581670_3;	-	-
At05	At_S0005	p3	GGCGGCGGCGGCGGCGGC	3581854	GOBAR_AA30149	3581166	3582998	-	-	-	-	-	-	-	At_S0005_3581854_1;At_S0005_3581854_2;At_S0005_3581854_3;	-	-
At05	At_S0005	p6	CCTTTCCCTTTCCCTTTC	3827367	GOBAR_AA35241	3825795	3828445	+	GO:0004650|GO:0005975|	polygalacturonase activity|carbohydrate metabolic process|	-	-	-	-	At_S0005_3827367_1;At_S0005_3827367_2;At_S0005_3827367_3;	-	-
At05	At_S0005	p3	CTGCTGCTGCTGCTGCTG	3854422	GOBAR_AA37228	3850002	3857607	-	GO:0003677|GO:0003677|GO:0005634|GO:0006355|GO:0009725|GO:0005515|GO:0005634|GO:0006355|	DNA binding|DNA binding|nucleus|regulation of transcription, DNA-templated|response to hormone|protein binding|nucleus|regulation of transcription, DNA-templated|	ko04075|	Plant hormone signal transduction |	K14486	-	At_S0005_3854422_1;At_S0005_3854422_2;At_S0005_3854422_3;	-	-
At05	At_S0005	p2	TCTCTCTCTCTCTCTCTCTCTC	3913542	GOBAR_AA29314	3912457	3916355	+	GO:0004499|GO:0050660|GO:0050661|GO:0055114|GO:0016491|GO:0055114|	N,N-dimethylaniline monooxygenase activity|flavin adenine dinucleotide binding|NADP binding|oxidation-reduction process|oxidoreductase activity|oxidation-reduction process|	ko00982|	Drug metabolism - cytochrome P450 |	-	At_S0005_3913542_1;At_S0005_3913542_2;At_S0005_3913542_3;	-	-	-
At05	At_S0005	p6	CAAAGGCAAAGGCAAAGG	3968749	GOBAR_AA29323	3968639	3970119	+	GO:0004842|GO:0016567|GO:0005515|GO:0008270|	ubiquitin-protein transferase activity|protein ubiquitination|protein binding|zinc ion binding|	-	-	-	At_S0005_3968749_1;At_S0005_3968749_2;At_S0005_3968749_3;	-	-	-
At05	At_S0005	p6	TGGAGCTGGAGCTGGAGCTGGAGC	4051651	GOBAR_AA34255	4049793	4052061	-	GO:0004857|GO:0005618|GO:0030599|GO:0042545|	enzyme inhibitor activity|cell wall|pectinesterase activity|cell wall modification|	-	-	-	-	-	At_S0005_4051651_3;	At_S0005_4051651_1;At_S0005_4051651_2;
At05	At_S0005	p6	CAAATTCAAATTCAAATT	4070406	GOBAR_AA34258	4067699	4083536	-	GO:0005086|GO:0032012|GO:0005488|	ARF guanyl-nucleotide exchange factor activity|regulation of ARF protein signal transduction|binding|	-	-	K13462	-	At_S0005_4070406_1;At_S0005_4070406_2;At_S0005_4070406_3;	-	-
At05	At_S0005	p6	AGTCTCAGTCTCAGTCTC	4209103	GOBAR_AA22058	4204339	4211481	+	GO:0003676|GO:0046872|	nucleic acid binding|metal ion binding|	-	-	-	-	-	At_S0005_4209103_1;At_S0005_4209103_2;At_S0005_4209103_3;	-
At05	At_S0005	p6	AGTCTCAGTCTCAGTCTC	4209834	GOBAR_AA22058	4204339	4211481	+	GO:0003676|GO:0046872|	nucleic acid binding|metal ion binding|	-	-	-	-	-	At_S0005_4209834_1;At_S0005_4209834_2;At_S0005_4209834_3;	-
At05	At_S0005	p2	GTGTGTGTGTGTGTGTGTGT	4411983	GOBAR_AA27699	4410346	4413181	+	GO:0016020|GO:0055085|	membrane|transmembrane transport|	-	-	-	At_S0005_4411983_1;	-	At_S0005_4411983_2;At_S0005_4411983_3;	-
At05	At_S0005	p5	TCAAATCAAATCAAATCAAATCAAA	4567602	GOBAR_AA37247	4565946	4567853	-	GO:0008610|	lipid biosynthetic process|	-	-	-	-	-	At_S0005_4567602_1;At_S0005_4567602_2;At_S0005_4567602_3;	-
At05	At_S0005	p3	AAGAAGAAGAAGAAGAAG	4690539	GOBAR_AA36679	4688880	4691114	-	GO:0005506|GO:0016491|GO:0055114|GO:0016491|GO:0055114|	iron ion binding|oxidoreductase activity|oxidation-reduction process|oxidoreductase activity|oxidation-reduction process|	-	-	-	At_S0005_4690539_1;At_S0005_4690539_2;At_S0005_4690539_3;	-	-	-
At05	At_S0005	p6	TAAAATTAAAATTAAAAT	4908788	GOBAR_AA33719	4906344	4908991	-	-	-	ko04141|	Protein processing in endoplasmic reticulum |	K13989	-	At_S0005_4908788_1;At_S0005_4908788_2;At_S0005_4908788_3;	-	-
At05	At_S0005	p6	TTCCGCTTCCGCTTCCGC	4929509	GOBAR_AA33722	4922634	4935674	-	-	-	-	-	-	-	At_S0005_4929509_1;At_S0005_4929509_2;At_S0005_4929509_3;	-	-
At05	At_S0005	p2	AGAGAGAGAGAGAGAGAGAG	4955743	GOBAR_AA34091	4954560	4962162	-	GO:0003676|GO:0003682|	nucleic acid binding|chromatin binding|	-	-	-	-	-	At_S0005_4955743_1;At_S0005_4955743_2;At_S0005_4955743_3;	-
At05	At_S0005	p2	TCTCTCTCTCTCTCTCTCTC	5019030	GOBAR_AA34094	5017713	5020606	+	GO:0004499|GO:0050660|GO:0050661|GO:0055114|GO:0016491|GO:0055114|	N,N-dimethylaniline monooxygenase activity|flavin adenine dinucleotide binding|NADP binding|oxidation-reduction process|oxidoreductase activity|oxidation-reduction process|	ko00380|	Tryptophan metabolism |	K11816	-	At_S0005_5019030_1;At_S0005_5019030_2;At_S0005_5019030_3;	-	-
At05	At_S0005	p3	GATGATGATGATGATGATGAT	5038494	GOBAR_AA14865	5034833	5038790	+	-	-	-	-	-	-	At_S0005_5038494_1;At_S0005_5038494_2;At_S0005_5038494_3;	-	-
At05	At_S0005	p6	TTTAAGTTTAAGTTTAAG	5129717	GOBAR_AA14871	5116790	5131491	+	GO:0003677|GO:0005524|GO:0016787|GO:0003723|GO:0004525|GO:0006396|GO:0005515|GO:0016891|	DNA binding|ATP binding|hydrolase activity|RNA binding|ribonuclease III activity|RNA processing|protein binding|endoribonuclease activity, producing 5'-phosphomonoesters|	ko05206|	MicroRNAs in cancer |	K11592	-	At_S0005_5129717_1;At_S0005_5129717_2;At_S0005_5129717_3;	-	-
At05	At_S0005	p6	AAAAAGAAAAAGAAAAAG	5173718	GOBAR_AA14874	5173282	5177323	-	GO:0000166|GO:0000166|GO:0046872|GO:0006754|GO:0016021|GO:0016887|GO:0016021|	nucleotide binding|nucleotide binding|metal ion binding|ATP biosynthetic process|integral component of membrane|ATPase activity|integral component of membrane|	ko00190|	Oxidative phosphorylation |	K01535	At_S0005_5173718_1;At_S0005_5173718_2;At_S0005_5173718_3;	-	-	-
At05	At_S0005	p6	TGATGGTGATGGTGATGG	5539248	GOBAR_AA16463	5538460	5542051	+	-	-	-	-	-	-	-	At_S0005_5539248_1;At_S0005_5539248_2;At_S0005_5539248_3;	-
At05	At_S0005	p5	TTTAATTTAATTTAATTTAA	5569112	GOBAR_AA16465	5567590	5569771	+	GO:0004129|GO:0005739|	cytochrome-c oxidase activity|mitochondrion|	-	-	-	-	At_S0005_5569112_1;At_S0005_5569112_2;At_S0005_5569112_3;	-	-
At05	At_S0005	p5	ATGATATGATATGATATGAT	5572079	GOBAR_AA16466	5570788	5573481	-	GO:0046983|	protein dimerization activity|	-	-	-	-	At_S0005_5572079_1;At_S0005_5572079_2;At_S0005_5572079_3;	-	-
At05	At_S0005	p3	GGAGGAGGAGGAGGAGGA	6074249	GOBAR_AA17656	6068248	6077075	-	GO:0005515|	protein binding|	-	-	-	-	-	At_S0005_6074249_1;At_S0005_6074249_2;At_S0005_6074249_3;	-
At05	At_S0005	p6	GGGGGAGGGGGAGGGGGA	6188419	GOBAR_AA40941	6182945	6191561	-	GO:0005515|	protein binding|	-	-	-	-	-	-	At_S0005_6188419_1;At_S0005_6188419_2;At_S0005_6188419_3;
At05	At_S0005	p3	GGAGGAGGAGGAGGAGGA	6188737	GOBAR_AA40941	6182945	6191561	-	GO:0005515|	protein binding|	-	-	-	-	-	At_S0005_6188737_1;At_S0005_6188737_2;At_S0005_6188737_3;	-
At05	At_S0005	p2	CACACACACACACACACA	6222495	GOBAR_AA29947	6222256	6223526	-	-	-	ko03018|	RNA degradation |	K12592	-	-	At_S0005_6222495_1;At_S0005_6222495_2;At_S0005_6222495_3;	-
At05	At_S0005	p3	GATGATGATGATGATGATGATGAT	6334433	GOBAR_AA21731	6334279	6335223	-	-	-	-	-	-	At_S0005_6334433_1;At_S0005_6334433_2;At_S0005_6334433_3;	-	-	-
At05	At_S0005	p6	GATGCTGATGCTGATGCT	6471680	GOBAR_AA21741	6470806	6475709	-	GO:0000166|GO:0000166|GO:0046872|GO:0006754|GO:0016021|GO:0016887|GO:0016021|	nucleotide binding|nucleotide binding|metal ion binding|ATP biosynthetic process|integral component of membrane|ATPase activity|integral component of membrane|	ko00190|	Oxidative phosphorylation |	K01535	-	At_S0005_6471680_1;At_S0005_6471680_2;At_S0005_6471680_3;	-	-
At05	At_S0005	p6	TTTGTTTTTGTTTTTGTTTTTGTT	6492077	GOBAR_AA21744	6489451	6492802	+	GO:0003676|GO:0008270|GO:0046872|	nucleic acid binding|zinc ion binding|metal ion binding|	-	-	K14816	-	At_S0005_6492077_1;At_S0005_6492077_2;At_S0005_6492077_3;	-	-
At05	At_S0005	p6	CCTCAACCTCAACCTCAACCTCAA	6503767	GOBAR_AA21746	6502512	6504569	-	-	-	-	-	-	-	-	At_S0005_6503767_1;At_S0005_6503767_2;At_S0005_6503767_3;	-
At05	At_S0005	p2	CTCTCTCTCTCTCTCTCTCT	6652679	GOBAR_AA33546	6652319	6654007	+	-	-	-	-	K07018	-	At_S0005_6652679_1;At_S0005_6652679_2;At_S0005_6652679_3;	-	-
At05	At_S0005	p6	TCGTCATCGTCATCGTCA	6746769	GOBAR_AA40900	6746197	6747253	-	-	-	-	-	-	At_S0005_6746769_3;	At_S0005_6746769_1;At_S0005_6746769_2;	-	-
At05	At_S0005	p3	GAAGAAGAAGAAGAAGAAGAA	6842023	GOBAR_AA23716	6840443	6842579	-	GO:0006457|	protein folding|	-	-	-	-	-	At_S0005_6842023_1;At_S0005_6842023_2;At_S0005_6842023_3;	-
At05	At_S0005	p3	TGCTGCTGCTGCTGCTGCTGC	6856670	GOBAR_AA23717	6851176	6859052	-	GO:0046983|	protein dimerization activity|	-	-	-	-	-	At_S0005_6856670_1;At_S0005_6856670_2;At_S0005_6856670_3;	-
At05	At_S0005	p5	ATGAAATGAAATGAAATGAA	7138907	GOBAR_AA33903	7136080	7139005	-	-	-	-	-	-	-	-	At_S0005_7138907_1;At_S0005_7138907_2;At_S0005_7138907_3;	-
At05	At_S0005	p6	ACCAGCACCAGCACCAGC	7206007	GOBAR_AA38303	7205448	7207123	-	-	-	-	-	-	-	At_S0005_7206007_1;At_S0005_7206007_2;At_S0005_7206007_3;	-	-
At05	At_S0005	p6	TATACATATACATATACATATACATATACATATACATATACA	7254406	GOBAR_AA25764	7253605	7258924	-	GO:0004553|GO:0005975|GO:0005975|	hydrolase activity, hydrolyzing O-glycosyl compounds|carbohydrate metabolic process|carbohydrate metabolic process|	ko00500|ko00460|ko00940|	Starch and sucrose metabolism |Cyanoamino acid metabolism |Phenylpropanoid biosynthesis |	-	-	At_S0005_7254406_1;At_S0005_7254406_2;At_S0005_7254406_3;	-	-
At05	At_S0005	p6	AAAAATAAAAATAAAAAT	7335047	GOBAR_AA25774	7333727	7342486	+	GO:0003779|	actin binding|	-	-	-	-	At_S0005_7335047_1;At_S0005_7335047_2;At_S0005_7335047_3;	-	-
At05	At_S0005	p4	TTTATTTATTTATTTATTTATTTA	7339962	GOBAR_AA25774	7333727	7342486	+	GO:0003779|	actin binding|	-	-	-	-	-	-	At_S0005_7339962_1;At_S0005_7339962_2;At_S0005_7339962_3;
At05	At_S0005	p4	TTTATTTATTTATTTATTTATTTA	7341253	GOBAR_AA25774	7333727	7342486	+	GO:0003779|	actin binding|	-	-	-	-	-	-	At_S0005_7341253_1;At_S0005_7341253_2;At_S0005_7341253_3;
At05	At_S0005	p6	CTTGAACTTGAACTTGAA	7386305	GOBAR_AA39995	7386106	7386450	-	-	-	-	-	-	-	-	At_S0005_7386305_1;At_S0005_7386305_2;At_S0005_7386305_3;	-
At05	At_S0005	p2	CTCTCTCTCTCTCTCTCTCT	7401714	GOBAR_AA39998	7400766	7403492	-	GO:0005515|	protein binding|	-	-	-	-	-	-	At_S0005_7401714_1;At_S0005_7401714_2;At_S0005_7401714_3;
At05	At_S0005	p2	ATATATATATATATATATAT	7427488	GOBAR_AA33970	7426837	7432129	+	GO:0004359|GO:0042819|GO:0042823|	glutaminase activity|vitamin B6 biosynthetic process|pyridoxal phosphate biosynthetic process|	ko00750|	Vitamin B6 metabolism |	K08681	-	-	-	At_S0005_7427488_1;At_S0005_7427488_2;At_S0005_7427488_3;
At05	At_S0005	p4	AATGAATGAATGAATGAATG	7563995	GOBAR_AA27720	7563304	7568256	+	GO:0003677|GO:0003677|GO:0005634|GO:0006355|GO:0009725|GO:0005515|GO:0005634|GO:0006355|	DNA binding|DNA binding|nucleus|regulation of transcription, DNA-templated|response to hormone|protein binding|nucleus|regulation of transcription, DNA-templated|	-	-	-	-	At_S0005_7563995_1;At_S0005_7563995_2;At_S0005_7563995_3;	-	-
At05	At_S0005	p2	AGAGAGAGAGAGAGAGAGAGAGAGAGAGAGAGAGAGAGAGAGAGAGAGAGAGAGAGAGAGAGAGAGAGAG	7585596	GOBAR_AA27719	7572842	7591034	-	GO:0003972|GO:0005524|GO:0006388|	RNA ligase (ATP) activity|ATP binding|tRNA splicing, via endonucleolytic cleavage and ligation|	-	-	-	-	-	-	-
At05	At_S0005	p3	TGATGATGATGATGATGATGATGATGATGA	7615024	GOBAR_AA27714	7614541	7615302	-	GO:0003677|GO:0006355|	DNA binding|regulation of transcription, DNA-templated|	-	-	-	-	At_S0005_7615024_1;At_S0005_7615024_2;At_S0005_7615024_3;	-	-
At05	At_S0005	p3	CTTCTTCTTCTTCTTCTTCTTCTT	7718597	GOBAR_AA36255	7716087	7718944	-	GO:0008137|GO:0009055|GO:0016020|	NADH dehydrogenase (ubiquinone) activity|electron carrier activity|membrane|	ko00190|ko05010|ko05012|ko05016|ko04932|	Oxidative phosphorylation |Alzheimer's disease |Parkinson's disease |Huntington's disease |Non-alcoholic fatty liver disease (NAFLD) |	K11352	-	At_S0005_7718597_1;At_S0005_7718597_2;At_S0005_7718597_3;	-	-
At05	At_S0005	p6	GAAAAGGAAAAGGAAAAG	7747154	GOBAR_AA36547	7746580	7759811	-	GO:0005515|GO:0006511|GO:0036459|GO:0016579|GO:0036459|	protein binding|ubiquitin-dependent protein catabolic process|thiol-dependent ubiquitinyl hydrolase activity|protein deubiquitination|thiol-dependent ubiquitinyl hydrolase activity|	ko04068|ko05203|ko05168|ko05169|	FoxO signaling pathway |Viral carcinogenesis |Herpes simplex infection |Epstein-Barr virus infection |	K11838	-	-	At_S0005_7747154_1;At_S0005_7747154_2;At_S0005_7747154_3;	-
At05	At_S0005	p1	TTTTTTTTTTTTTTTTTTTTT	7769746	GOBAR_AA36548	7766124	7780763	+	GO:0003682|GO:0006281|GO:0007064|GO:0008280|GO:0005515|GO:0005524|GO:0005694|GO:0051276|	chromatin binding|DNA repair|mitotic sister chromatid cohesion|cohesin core heterodimer|protein binding|ATP binding|chromosome|chromosome organization|	ko04110|ko04111|ko04113|ko04114|	Cell cycle |Cell cycle - yeast |Meiosis - yeast |Oocyte meiosis |	K06669	-	-	At_S0005_7769746_1;At_S0005_7769746_2;At_S0005_7769746_3;	-
At05	At_S0005	p3	TGATGATGATGATGATGATGA	7778526	GOBAR_AA36548	7766124	7780763	+	GO:0003682|GO:0006281|GO:0007064|GO:0008280|GO:0005515|GO:0005524|GO:0005694|GO:0051276|	chromatin binding|DNA repair|mitotic sister chromatid cohesion|cohesin core heterodimer|protein binding|ATP binding|chromosome|chromosome organization|	ko04110|ko04111|ko04113|ko04114|	Cell cycle |Cell cycle - yeast |Meiosis - yeast |Oocyte meiosis |	K06669	-	At_S0005_7778526_1;At_S0005_7778526_2;At_S0005_7778526_3;	-	-
At05	At_S0005	p6	CATCTCCATCTCCATCTC	7892599	GOBAR_AA21453	7892206	7895067	-	GO:0003677|GO:0003677|GO:0006355|	DNA binding|DNA binding|regulation of transcription, DNA-templated|	-	-	-	-	At_S0005_7892599_1;At_S0005_7892599_2;At_S0005_7892599_3;	-	-
At05	At_S0005	p5	AAAATAAAATAAAATAAAAT	7999588	GOBAR_AA23215	7995826	8001692	-	GO:0009966|GO:0016020|GO:0016021|GO:0016485|	regulation of signal transduction|membrane|integral component of membrane|protein processing|	-	-	-	-	At_S0005_7999588_1;At_S0005_7999588_2;At_S0005_7999588_3;	-	-
At05	At_S0005	p3	GAAGAAGAAGAAGAAGAAGAAGAAGAAGAA	8177644	GOBAR_AA33122	8176099	8181293	+	GO:0000166|GO:0003676|	nucleotide binding|nucleic acid binding|	-	-	-	-	At_S0005_8177644_1;At_S0005_8177644_2;At_S0005_8177644_3;	-	-
At05	At_S0005	p3	TGCTGCTGCTGCTGCTGC	8438515	GOBAR_AA40011	8437479	8439528	+	GO:0046872|	metal ion binding|	-	-	-	-	-	-	At_S0005_8438515_1;At_S0005_8438515_2;At_S0005_8438515_3;
At05	At_S0005	p6	AATATAAATATAAATATA	8454389	GOBAR_AA40013	8448243	8455928	+	GO:0003824|GO:0006281|GO:0051539|	catalytic activity|DNA repair|4 iron, 4 sulfur cluster binding|	-	-	-	-	At_S0005_8454389_1;At_S0005_8454389_2;At_S0005_8454389_3;	-	-
At05	At_S0005	p3	CACCACCACCACCACCAC	8674006	GOBAR_AA23957	8669190	8674414	-	-	-	-	-	-	-	-	At_S0005_8674006_1;At_S0005_8674006_2;At_S0005_8674006_3;	-
At05	At_S0005	p2	CTCTCTCTCTCTCTCTCTCT	8686632	GOBAR_AA23958	8683154	8688724	+	GO:0004222|GO:0005524|GO:0006508|GO:0004222|GO:0005524|GO:0008270|GO:0016021|GO:0004222|GO:0016020|GO:0005524|	metalloendopeptidase activity|ATP binding|proteolysis|metalloendopeptidase activity|ATP binding|zinc ion binding|integral component of membrane|metalloendopeptidase activity|membrane|ATP binding|	-	-	K03798	-	-	At_S0005_8686632_1;At_S0005_8686632_2;At_S0005_8686632_3;	-
At05	At_S0005	p6	CTCTTCCTCTTCCTCTTCCTCTTC	8728409	GOBAR_AA23967	8727049	8729001	-	GO:0000166|GO:0003676|GO:0046872|	nucleotide binding|nucleic acid binding|metal ion binding|	-	-	K13107	-	-	-	At_S0005_8728409_1;At_S0005_8728409_2;At_S0005_8728409_3;
At05	At_S0005	p6	GGAGGTGGAGGTGGAGGTGGAGGT	8846622	GOBAR_AA34847	8846352	8850779	+	GO:0006886|GO:0015450|GO:0019867|	intracellular protein transport|P-P-bond-hydrolysis-driven protein transmembrane transporter activity|outer membrane|	-	-	-	-	At_S0005_8846622_1;At_S0005_8846622_2;At_S0005_8846622_3;	-	-
At05	At_S0005	p2	GAGAGAGAGAGAGAGAGAGAGAGAGAGAGAGAGAGAGAGAGAGAGAGAGAGAGAGA	8906507	GOBAR_AA36373	8905681	8910568	-	-	-	-	-	-	-	-	-	-
At05	At_S0005	p3	TAATAATAATAATAATAA	8908833	GOBAR_AA36373	8905681	8910568	-	-	-	-	-	-	-	-	At_S0005_8908833_1;At_S0005_8908833_2;At_S0005_8908833_3;	-
At05	At_S0005	p5	AATCAAATCAAATCAAATCA	9017897	GOBAR_AA35250	9016270	9018172	-	-	-	-	-	-	At_S0005_9017897_1;	At_S0005_9017897_2;At_S0005_9017897_3;	-	-
At05	At_S0005	p6	TAAAAATAAAAATAAAAA	9079059	GOBAR_AA31948	9077516	9080643	-	GO:0005576|GO:0009664|	extracellular region|plant-type cell wall organization|	-	-	-	At_S0005_9079059_1;At_S0005_9079059_2;At_S0005_9079059_3;	-	-	-
At05	At_S0005	p3	TTCTTCTTCTTCTTCTTCTTCTTC	9182590	GOBAR_AA12977	9182472	9185773	+	GO:0055085|	transmembrane transport|	-	-	K15276	-	-	-	At_S0005_9182590_1;At_S0005_9182590_2;At_S0005_9182590_3;
At05	At_S0005	p3	TTCTTCTTCTTCTTCTTCTTCTTC	9183669	GOBAR_AA12977	9182472	9185773	+	GO:0055085|	transmembrane transport|	-	-	K15276	-	-	-	At_S0005_9183669_1;At_S0005_9183669_2;At_S0005_9183669_3;
At05	At_S0005	p3	GATGATGATGATGATGAT	9326828	GOBAR_AA12985	9326696	9332053	+	GO:0031011|	Ino80 complex|	-	-	-	-	-	-	At_S0005_9326828_1;At_S0005_9326828_2;At_S0005_9326828_3;
At05	At_S0005	p3	GATGATGATGATGATGAT	9327661	GOBAR_AA12985	9326696	9332053	+	GO:0031011|	Ino80 complex|	-	-	-	-	-	-	At_S0005_9327661_2;At_S0005_9327661_1;At_S0005_9327661_3;
At05	At_S0005	p6	TAAAAATAAAAATAAAAA	9457014	GOBAR_AA29195	9450927	9459419	-	GO:0000155|GO:0000160|GO:0004672|GO:0005524|GO:0006468|GO:0004672|GO:0006468|GO:0005524|	phosphorelay sensor kinase activity|phosphorelay signal transduction system|protein kinase activity|ATP binding|protein phosphorylation|protein kinase activity|protein phosphorylation|ATP binding|	-	-	K08282	-	-	-	At_S0005_9457014_1;At_S0005_9457014_2;At_S0005_9457014_3;
At05	At_S0005	p4	CAAACAAACAAACAAACAAA	9463041	GOBAR_AA29196	9462652	9466455	-	GO:0000160|	phosphorelay signal transduction system|	-	-	K12129	-	At_S0005_9463041_1;At_S0005_9463041_2;At_S0005_9463041_3;	-	-
At05	At_S0005	p5	ATTTTATTTTATTTTATTTT	9603816	GOBAR_AA22345	9598957	9609462	+	GO:0005524|GO:0005524|GO:0016887|GO:0005737|GO:0042026|	ATP binding|ATP binding|ATPase activity|cytoplasm|protein refolding|	-	-	-	-	At_S0005_9603816_1;At_S0005_9603816_2;At_S0005_9603816_3;	-	-
At05	At_S0005	p6	CAATGGCAATGGCAATGG	9632044	GOBAR_AA22348	9631952	9632409	-	GO:0006886|GO:0006888|GO:0008270|GO:0030127|GO:0006886|GO:0006888|GO:0030127|	intracellular protein transport|ER to Golgi vesicle-mediated transport|zinc ion binding|COPII vesicle coat|intracellular protein transport|ER to Golgi vesicle-mediated transport|COPII vesicle coat|	ko04141|	Protein processing in endoplasmic reticulum |	K14006	-	At_S0005_9632044_1;At_S0005_9632044_2;At_S0005_9632044_3;	-	-
At05	At_S0005	p6	AAATCCAAATCCAAATCC	9673278	GOBAR_AA22350	9671795	9674293	-	-	-	-	-	-	-	At_S0005_9673278_1;At_S0005_9673278_2;At_S0005_9673278_3;	-	-
At05	At_S0005	p3	CTTCTTCTTCTTCTTCTTCTT	9688389	GOBAR_AA22353	9686834	9694919	+	GO:0005524|GO:0016887|GO:0016020|	ATP binding|ATPase activity|membrane|	-	-	-	-	At_S0005_9688389_1;At_S0005_9688389_2;At_S0005_9688389_3;	-	-
At05	At_S0005	p2	TCTCTCTCTCTCTCTCTCTCTCTC	9856199	GOBAR_AA20687	9855121	9861465	+	GO:0003676|GO:0005515|	nucleic acid binding|protein binding|	-	-	-	-	At_S0005_9856199_1;At_S0005_9856199_2;At_S0005_9856199_3;	-	-
At05	At_S0005	p6	TCCTCTTCCTCTTCCTCTTCCTCT	9880179	GOBAR_AA20684	9876023	9880411	-	GO:0000166|GO:0003676|	nucleotide binding|nucleic acid binding|	ko03040|	Spliceosome |	-	-	-	-	At_S0005_9880179_1;At_S0005_9880179_2;At_S0005_9880179_3;
At05	At_S0005	p2	TGTGTGTGTGTGTGTGTGTGTGTGTGTGTGTG	9886763	GOBAR_AA20683	9884154	9888982	+	GO:0016021|GO:0055085|	integral component of membrane|transmembrane transport|	-	-	-	-	-	At_S0005_9886763_1;At_S0005_9886763_2;At_S0005_9886763_3;	-
At05	At_S0005	p2	GAGAGAGAGAGAGAGAGA	9891507	GOBAR_AA20682	9889478	9892013	-	GO:0003743|GO:0005737|GO:0005852|GO:0005515|	translation initiation factor activity|cytoplasm|eukaryotic translation initiation factor 3 complex|protein binding|	ko03013|	RNA transport |	K03246	At_S0005_9891507_2;	At_S0005_9891507_1;At_S0005_9891507_3;	-	-
At05	At_S0005	p3	GTTGTTGTTGTTGTTGTT	9982939	GOBAR_AA13675	9980628	9983034	-	-	-	-	-	-	At_S0005_9982939_1;At_S0005_9982939_2;At_S0005_9982939_3;	-	-	-
At05	At_S0005	p5	TGCAATGCAATGCAATGCAA	10029304	GOBAR_AA13681	10028940	10032767	-	-	-	-	-	-	At_S0005_10029304_1;At_S0005_10029304_2;At_S0005_10029304_3;	-	-	-
At05	At_S0005	p6	TTTCTTTTTCTTTTTCTT	10077886	GOBAR_AA13683	10075821	10091426	+	GO:0005515|GO:0005515|GO:0008270|GO:0005524|	protein binding|protein binding|zinc ion binding|ATP binding|	ko05203|	Viral carcinogenesis |	-	-	At_S0005_10077886_1;At_S0005_10077886_2;At_S0005_10077886_3;	-	-
At05	At_S0005	p3	TATTATTATTATTATTAT	10106815	GOBAR_AA13684	10105310	10109287	+	GO:0005515|GO:0008270|	protein binding|zinc ion binding|	-	-	-	-	At_S0005_10106815_1;At_S0005_10106815_2;At_S0005_10106815_3;	-	-
At05	At_S0005	p3	CACCACCACCACCACCAC	10223498	GOBAR_AA20603	10223151	10224827	-	GO:0030001|GO:0046872|	metal ion transport|metal ion binding|	-	-	-	-	At_S0005_10223498_1;At_S0005_10223498_2;At_S0005_10223498_3;	-	-
At05	At_S0005	p4	ATGTATGTATGTATGTATGTATGTATGTATGTATGT	10224568	GOBAR_AA20603	10223151	10224827	-	GO:0030001|GO:0046872|	metal ion transport|metal ion binding|	-	-	-	-	At_S0005_10224568_1;At_S0005_10224568_2;At_S0005_10224568_3;	-	-
At05	At_S0005	p4	ATACATACATACATACATAC	10578810	GOBAR_AA13006	10576320	10579942	+	GO:0003700|GO:0006355|GO:0043565|	transcription factor activity, sequence-specific DNA binding|regulation of transcription, DNA-templated|sequence-specific DNA binding|	-	-	-	-	At_S0005_10578810_1;At_S0005_10578810_2;At_S0005_10578810_3;	-	-
At05	At_S0005	p3	GGCGGCGGCGGCGGCGGCGGCGGC	10591473	GOBAR_AA13008	10590972	10592358	-	-	-	-	-	-	-	-	At_S0005_10591473_1;At_S0005_10591473_2;At_S0005_10591473_3;	-
At05	At_S0005	p3	GGCGGCGGCGGCGGCGGCGGCGGC	10592884	GOBAR_AA13009	10592383	10592922	-	-	-	-	-	-	-	-	At_S0005_10592884_1;At_S0005_10592884_2;At_S0005_10592884_3;	-
At05	At_S0005	p6	GGGGGTGGGGGTGGGGGT	10630843	GOBAR_AA13013	10627182	10631877	+	GO:0005515|GO:0006886|	protein binding|intracellular protein transport|	-	-	-	-	-	-	At_S0005_10630843_1;At_S0005_10630843_2;At_S0005_10630843_3;
At05	At_S0005	p2	GAGAGAGAGAGAGAGAGAGA	10638187	GOBAR_AA13015	10635958	10641826	-	GO:0005634|	nucleus|	-	-	-	-	-	-	At_S0005_10638187_1;At_S0005_10638187_2;At_S0005_10638187_3;
At05	At_S0005	p1	AAAAAAAAAAAAAAAAAA	10765485	GOBAR_AA26907	10744170	10775387	-	GO:0005488|GO:0006886|	binding|intracellular protein transport|	-	-	-	At_S0005_10765485_1;At_S0005_10765485_2;At_S0005_10765485_3;	-	-	-
At05	At_S0005	p6	TCCGGCTCCGGCTCCGGCTCCGGC	10795136	GOBAR_AA26908	10794290	10795710	+	GO:0006629|GO:0008152|	lipid metabolic process|metabolic process|	-	-	-	At_S0005_10795136_2;At_S0005_10795136_3;	At_S0005_10795136_1;	-	-
At05	At_S0005	p3	TAATAATAATAATAATAA	10878108	GOBAR_AA31899	10877697	10882283	+	GO:0004672|GO:0005524|GO:0006468|GO:0004672|GO:0006468|GO:0005515|	protein kinase activity|ATP binding|protein phosphorylation|protein kinase activity|protein phosphorylation|protein binding|	-	-	-	-	At_S0005_10878108_1;At_S0005_10878108_2;At_S0005_10878108_3;	-	-
At05	At_S0005	p1	TTTTTTTTTTTTTTTTTT	10878930	GOBAR_AA31899	10877697	10882283	+	GO:0004672|GO:0005524|GO:0006468|GO:0004672|GO:0006468|GO:0005515|	protein kinase activity|ATP binding|protein phosphorylation|protein kinase activity|protein phosphorylation|protein binding|	-	-	-	At_S0005_10878930_1;At_S0005_10878930_2;At_S0005_10878930_3;	-	-	-
At05	At_S0005	p6	TCTTTTTCTTTTTCTTTT	10916336	GOBAR_AA31903	10915494	10923247	+	GO:0005524|GO:0016887|GO:0016020|	ATP binding|ATPase activity|membrane|	-	-	-	-	At_S0005_10916336_1;At_S0005_10916336_2;At_S0005_10916336_3;	-	-
At05	At_S0005	p6	AAATATAAATATAAATAT	11132799	GOBAR_AA34887	11132080	11135456	+	GO:0016747|	transferase activity, transferring acyl groups other than amino-acyl groups|	ko00940|ko00945|ko00941|	Phenylpropanoid biosynthesis |Stilbenoid, diarylheptanoid and gingerol biosynthesis |Flavonoid biosynthesis |	K13065	-	At_S0005_11132799_1;At_S0005_11132799_2;At_S0005_11132799_3;	-	-
At05	At_S0005	p5	ATGGGATGGGATGGGATGGG	11132926	GOBAR_AA34887	11132080	11135456	+	GO:0016747|	transferase activity, transferring acyl groups other than amino-acyl groups|	ko00940|ko00945|ko00941|	Phenylpropanoid biosynthesis |Stilbenoid, diarylheptanoid and gingerol biosynthesis |Flavonoid biosynthesis |	K13065	At_S0005_11132926_1;At_S0005_11132926_2;At_S0005_11132926_3;	-	-	-
At05	At_S0005	p2	ATATATATATATATATATATATATAT	11145501	GOBAR_AA34884	11145413	11146665	+	-	-	-	-	-	-	At_S0005_11145501_1;At_S0005_11145501_2;At_S0005_11145501_3;	-	-
At05	At_S0005	p3	CTTCTTCTTCTTCTTCTTCTTCTT	11160151	GOBAR_AA34881	11159875	11161947	+	GO:0004190|GO:0006508|	aspartic-type endopeptidase activity|proteolysis|	-	-	-	-	At_S0005_11160151_1;At_S0005_11160151_2;At_S0005_11160151_3;	-	-
At05	At_S0005	p6	GGTGGGGGTGGGGGTGGG	11323233	GOBAR_AA24484	11323046	11325619	+	GO:0008080|	N-acetyltransferase activity|	-	-	-	-	-	At_S0005_11323233_1;At_S0005_11323233_2;At_S0005_11323233_3;	-
At05	At_S0005	p3	ATTATTATTATTATTATT	11329386	GOBAR_AA24485	11328892	11329730	-	-	-	-	-	-	-	-	At_S0005_11329386_1;At_S0005_11329386_2;At_S0005_11329386_3;	-
At05	At_S0005	p6	TTCTGCTTCTGCTTCTGCTTCTGC	11363740	GOBAR_AA24487	11363055	11369592	+	-	-	-	-	-	-	At_S0005_11363740_1;At_S0005_11363740_2;At_S0005_11363740_3;	-	-
At05	At_S0005	p3	TCATCATCATCATCATCATCATCA	11371511	GOBAR_AA24488	11371321	11375750	-	GO:0005216|GO:0006811|GO:0016020|GO:0055085|GO:0005515|	ion channel activity|ion transport|membrane|transmembrane transport|protein binding|	ko04626|	Plant-pathogen interaction |	K05391	-	At_S0005_11371511_1;At_S0005_11371511_2;At_S0005_11371511_3;	-	-
At05	At_S0005	p3	TCTTCTTCTTCTTCTTCT	11459489	GOBAR_AA24292	11459305	11459967	-	GO:0003677|GO:0003700|GO:0006355|	DNA binding|transcription factor activity, sequence-specific DNA binding|regulation of transcription, DNA-templated|	-	-	-	-	-	At_S0005_11459489_1;At_S0005_11459489_2;At_S0005_11459489_3;	-
At05	At_S0005	p1	AAAAAAAAAAAAAAAAAAAA	11535704	GOBAR_AA24298	11532704	11539404	-	GO:0005215|GO:0006810|GO:0016020|	transporter activity|transport|membrane|	-	-	K03322	At_S0005_11535704_1;At_S0005_11535704_2;At_S0005_11535704_3;	-	-	-
At05	At_S0005	p2	GAGAGAGAGAGAGAGAGAGAGA	11720147	GOBAR_AA32493	11719507	11721320	-	-	-	-	-	K13153	At_S0005_11720147_1;At_S0005_11720147_2;At_S0005_11720147_3;	-	-	-
At05	At_S0005	p4	ATAAATAAATAAATAAATAA	11792767	GOBAR_AA37211	11792071	11795703	-	GO:0004672|GO:0005524|GO:0006468|GO:0004672|GO:0006468|	protein kinase activity|ATP binding|protein phosphorylation|protein kinase activity|protein phosphorylation|	-	-	-	-	At_S0005_11792767_1;At_S0005_11792767_2;At_S0005_11792767_3;	-	-
At05	At_S0005	p3	TTCTTCTTCTTCTTCTTC	11840746	GOBAR_AA36348	11839717	11842544	+	GO:0046983|	protein dimerization activity|	-	-	-	-	At_S0005_11840746_1;At_S0005_11840746_2;At_S0005_11840746_3;	-	-
At05	At_S0005	p1	AAAAAAAAAAAAAAAAAA	11884299	GOBAR_AA36354	11881334	11885885	-	GO:0005215|GO:0016021|GO:0055085|GO:0016020|GO:0022891|GO:0055085|GO:0016021|GO:0022857|GO:0055085|	transporter activity|integral component of membrane|transmembrane transport|membrane|substrate-specific transmembrane transporter activity|transmembrane transport|integral component of membrane|transmembrane transporter activity|transmembrane transport|	-	-	-	-	At_S0005_11884299_1;At_S0005_11884299_2;At_S0005_11884299_3;	-	-
At05	At_S0005	p1	TTTTTTTTTTTTTTTTTTTT	11923886	GOBAR_AA32556	11923798	11929174	+	GO:0003677|GO:0006355|GO:0043565|GO:0008289|	DNA binding|regulation of transcription, DNA-templated|sequence-specific DNA binding|lipid binding|	-	-	K09338	-	At_S0005_11923886_1;At_S0005_11923886_2;At_S0005_11923886_3;	-	-
At05	At_S0005	p4	TAAATAAATAAATAAATAAA	11999811	GOBAR_AA30819	11993950	12001233	-	GO:0005524|GO:0016887|GO:0016020|	ATP binding|ATPase activity|membrane|	-	-	-	-	-	At_S0005_11999811_1;At_S0005_11999811_2;At_S0005_11999811_3;	-
At05	At_S0005	p3	AACAACAACAACAACAACAACAACAAC	12045855	GOBAR_AA30822	12037748	12046253	-	GO:0005524|GO:0016887|GO:0016020|	ATP binding|ATPase activity|membrane|	-	-	-	-	At_S0005_12045855_1;At_S0005_12045855_2;At_S0005_12045855_3;	-	-
At05	At_S0005	p3	TTCTTCTTCTTCTTCTTC	12124142	GOBAR_AA22974	12124077	12124558	+	-	-	-	-	-	At_S0005_12124142_2;	At_S0005_12124142_1;At_S0005_12124142_3;	-	-
At05	At_S0005	p3	AGTAGTAGTAGTAGTAGTAGTAGTAGTAGTAGTAGTAGTAGTAGT	12364101	GOBAR_AA30491	12360952	12371594	-	GO:0005198|GO:0006886|GO:0016192|GO:0030117|GO:0005515|	structural molecule activity|intracellular protein transport|vesicle-mediated transport|membrane coat|protein binding|	-	-	-	-	-	At_S0005_12364101_1;At_S0005_12364101_2;At_S0005_12364101_3;	-
At05	At_S0005	p1	AAAAAAAAAAAAAAAAAAA	12616223	GOBAR_AA25716	12616151	12619733	-	GO:0005524|GO:0005524|GO:0005737|GO:0006457|GO:0005737|GO:0042026|	ATP binding|ATP binding|cytoplasm|protein folding|cytoplasm|protein refolding|	ko03018|ko04212|ko04940|ko05134|ko05152|	RNA degradation |Longevity regulating pathway - worm |Type I diabetes mellitus |Legionellosis |Tuberculosis |	-	-	-	At_S0005_12616223_1;At_S0005_12616223_2;At_S0005_12616223_3;	-
At05	At_S0005	p2	ATATATATATATATATATAT	12685869	GOBAR_AA25723	12685248	12688497	+	GO:0005524|GO:0016887|GO:0016020|	ATP binding|ATPase activity|membrane|	-	-	-	At_S0005_12685869_1;At_S0005_12685869_2;At_S0005_12685869_3;	-	-	-
At05	At_S0005	p1	AAAAAAAAAAAAAAAAAAA	12707010	GOBAR_AA26944	12706217	12707554	-	GO:0008152|GO:0016787|	metabolic process|hydrolase activity|	-	-	K14664	-	At_S0005_12707010_2;	-	At_S0005_12707010_1;At_S0005_12707010_3;
At05	At_S0005	p3	CCACCACCACCACCACCA	12724079	GOBAR_AA26949	12723334	12728391	-	-	-	-	-	-	-	At_S0005_12724079_1;At_S0005_12724079_2;At_S0005_12724079_3;	-	-
At05	At_S0005	p3	GATGATGATGATGATGAT	12724614	GOBAR_AA26949	12723334	12728391	-	-	-	-	-	-	-	At_S0005_12724614_1;At_S0005_12724614_2;At_S0005_12724614_3;	-	-
At05	At_S0005	p6	GGGAAAGGGAAAGGGAAA	12767465	GOBAR_AA26955	12767347	12776884	-	GO:0000159|GO:0008601|GO:0005515|	protein phosphatase type 2A complex|protein phosphatase type 2A regulator activity|protein binding|	ko03015|ko04390|ko04391|ko04071|ko04151|ko04152|ko04111|ko04530|ko04261|ko04728|ko05160|ko05142|	mRNA surveillance pathway |Hippo signaling pathway |Hippo signaling pathway -fly |Sphingolipid signaling pathway |PI3K-Akt signaling pathway |AMPK signaling pathway |Cell cycle - yeast |Tight junction |Adrenergic signaling in cardiomyocytes |Dopaminergic synapse |Hepatitis C |Chagas disease (American trypanosomiasis) |	K04354	-	At_S0005_12767465_1;At_S0005_12767465_2;At_S0005_12767465_3;	-	-
At05	At_S0005	p2	ACACACACACACACACACACACACACAC	12769546	GOBAR_AA26955	12767347	12776884	-	GO:0000159|GO:0008601|GO:0005515|	protein phosphatase type 2A complex|protein phosphatase type 2A regulator activity|protein binding|	ko03015|ko04390|ko04391|ko04071|ko04151|ko04152|ko04111|ko04530|ko04261|ko04728|ko05160|ko05142|	mRNA surveillance pathway |Hippo signaling pathway |Hippo signaling pathway -fly |Sphingolipid signaling pathway |PI3K-Akt signaling pathway |AMPK signaling pathway |Cell cycle - yeast |Tight junction |Adrenergic signaling in cardiomyocytes |Dopaminergic synapse |Hepatitis C |Chagas disease (American trypanosomiasis) |	K04354	At_S0005_12769546_1;At_S0005_12769546_2;At_S0005_12769546_3;	-	-	-
At05	At_S0005	p5	CTTTTCTTTTCTTTTCTTTT	12825169	GOBAR_AA26961	12824229	12831050	+	GO:0004672|GO:0005524|GO:0006468|GO:0004672|GO:0006468|	protein kinase activity|ATP binding|protein phosphorylation|protein kinase activity|protein phosphorylation|	-	-	-	-	At_S0005_12825169_1;At_S0005_12825169_2;At_S0005_12825169_3;	-	-
At05	At_S0005	p2	AGAGAGAGAGAGAGAGAGAGAGAG	12862962	GOBAR_AA36320	12862045	12864358	+	GO:0003676|GO:0046872|	nucleic acid binding|metal ion binding|	-	-	-	At_S0005_12862962_1;At_S0005_12862962_2;At_S0005_12862962_3;	-	-	-
At05	At_S0005	p6	TTTTGTTTTTGTTTTTGT	12863141	GOBAR_AA36320	12862045	12864358	+	GO:0003676|GO:0046872|	nucleic acid binding|metal ion binding|	-	-	-	At_S0005_12863141_1;At_S0005_12863141_2;At_S0005_12863141_3;	-	-	-
At05	At_S0005	p3	ACCACCACCACCACCACC	12864185	GOBAR_AA36320	12862045	12864358	+	GO:0003676|GO:0046872|	nucleic acid binding|metal ion binding|	-	-	-	At_S0005_12864185_1;At_S0005_12864185_2;At_S0005_12864185_3;	-	-	-
At05	At_S0005	p5	ATAGAATAGAATAGAATAGAATAGA	13495117	GOBAR_AA36470	13493689	13499673	+	-	-	-	-	-	-	-	At_S0005_13495117_1;At_S0005_13495117_2;At_S0005_13495117_3;	-
At05	At_S0005	p5	ATAGAATAGAATAGAATAGAATAGA	13496706	GOBAR_AA36470	13493689	13499673	+	-	-	-	-	-	-	-	At_S0005_13496706_1;At_S0005_13496706_2;At_S0005_13496706_3;	-
At05	At_S0005	p4	AACAAACAAACAAACAAACAAACA	13564583	GOBAR_AA22898	13560311	13564754	-	GO:0003677|GO:0003678|GO:0005524|GO:0005634|GO:0006270|GO:0042555|GO:0003677|GO:0005524|GO:0006260|	DNA binding|DNA helicase activity|ATP binding|nucleus|DNA replication initiation|MCM complex|DNA binding|ATP binding|DNA replication|	ko03030|ko04110|ko04111|ko04113|	DNA replication |Cell cycle |Cell cycle - yeast |Meiosis - yeast |	K02541	At_S0005_13564583_1;At_S0005_13564583_3;	At_S0005_13564583_2;	-	-
At05	At_S0005	p4	TCTTTCTTTCTTTCTTTCTTTCTT	13723734	GOBAR_AA20099	13723064	13730505	+	GO:0004672|GO:0005524|GO:0006468|GO:0004672|GO:0006468|GO:0005515|GO:0005524|	protein kinase activity|ATP binding|protein phosphorylation|protein kinase activity|protein phosphorylation|protein binding|ATP binding|	-	-	-	At_S0005_13723734_1;At_S0005_13723734_2;At_S0005_13723734_3;	-	-	-
At05	At_S0005	p3	TGGTGGTGGTGGTGGTGGTGGTGGTGGTGG	13726359	GOBAR_AA20099	13723064	13730505	+	GO:0004672|GO:0005524|GO:0006468|GO:0004672|GO:0006468|GO:0005515|GO:0005524|	protein kinase activity|ATP binding|protein phosphorylation|protein kinase activity|protein phosphorylation|protein binding|ATP binding|	-	-	-	-	-	At_S0005_13726359_1;At_S0005_13726359_2;At_S0005_13726359_3;	-
At05	At_S0005	p2	AGAGAGAGAGAGAGAGAGAGAG	13835230	GOBAR_AA20117	13831356	13838529	-	GO:0005515|GO:0006396|	protein binding|RNA processing|	-	-	K13217	-	-	At_S0005_13835230_1;At_S0005_13835230_2;At_S0005_13835230_3;	-
At05	At_S0005	p2	AGAGAGAGAGAGAGAGAGAG	13845499	GOBAR_AA20119	13843293	13848493	-	GO:0005515|GO:0006508|GO:0008236|	protein binding|proteolysis|serine-type peptidase activity|	-	-	-	-	-	At_S0005_13845499_1;At_S0005_13845499_2;At_S0005_13845499_3;	-
At05	At_S0005	p3	TTCTTCTTCTTCTTCTTC	13847922	GOBAR_AA20119	13843293	13848493	-	GO:0005515|GO:0006508|GO:0008236|	protein binding|proteolysis|serine-type peptidase activity|	-	-	-	-	-	-	At_S0005_13847922_1;At_S0005_13847922_2;At_S0005_13847922_3;
At05	At_S0005	p3	ATAATAATAATAATAATAATA	13885807	GOBAR_AA20122	13881877	13889030	-	GO:0004672|GO:0005524|GO:0006468|GO:0004672|GO:0006468|GO:0005515|GO:0005524|	protein kinase activity|ATP binding|protein phosphorylation|protein kinase activity|protein phosphorylation|protein binding|ATP binding|	-	-	-	-	-	At_S0005_13885807_1;At_S0005_13885807_2;	At_S0005_13885807_3;
At05	At_S0005	p2	TATATATATATATATATA	13900963	GOBAR_AA20123	13895381	13904113	-	GO:0004672|GO:0005524|GO:0006468|GO:0004672|GO:0006468|	protein kinase activity|ATP binding|protein phosphorylation|protein kinase activity|protein phosphorylation|	-	-	-	-	-	At_S0005_13900963_1;At_S0005_13900963_2;At_S0005_13900963_3;	-
At05	At_S0005	p2	CTCTCTCTCTCTCTCTCTCTCT	13933105	GOBAR_AA07136	13931950	13933222	-	GO:0005484|GO:0006886|GO:0016020|GO:0005515|GO:0016020|GO:0016192|GO:0016020|GO:0048193|	SNAP receptor activity|intracellular protein transport|membrane|protein binding|membrane|vesicle-mediated transport|membrane|Golgi vesicle transport|	ko04130|	SNARE interactions in vesicular transport |	K08498	At_S0005_13933105_1;At_S0005_13933105_2;At_S0005_13933105_3;	-	-	-
At05	At_S0005	p2	TCTCTCTCTCTCTCTCTCTCTCTCTCTCTCTCTCTCTC	14319455	GOBAR_AA24841	14318982	14320676	+	GO:0005094|GO:0005737|	Rho GDP-dissociation inhibitor activity|cytoplasm|	ko04962|ko04722|	Vasopressin-regulated water reabsorption |Neurotrophin signaling pathway |	K12462	-	-	At_S0005_14319455_1;At_S0005_14319455_2;At_S0005_14319455_3;	-
At05	At_S0005	p3	TAATAATAATAATAATAA	14387927	GOBAR_AA24828	14386074	14388707	-	-	-	-	-	-	-	At_S0005_14387927_1;At_S0005_14387927_2;At_S0005_14387927_3;	-	-
At05	At_S0005	p6	AAAGAGAAAGAGAAAGAGAAAGAG	14420788	GOBAR_AA24825	14420383	14421405	+	-	-	-	-	-	-	At_S0005_14420788_1;At_S0005_14420788_2;At_S0005_14420788_3;	-	-
At05	At_S0005	p3	CATCATCATCATCATCATCATCATCAT	14501068	GOBAR_AA25346	14497863	14501682	-	GO:0016757|GO:0047262|	transferase activity, transferring glycosyl groups|polygalacturonate 4-alpha-galacturonosyltransferase activity|	ko00500|ko00520|	Starch and sucrose metabolism |Amino sugar and nucleotide sugar metabolism |	K13648	-	At_S0005_14501068_1;At_S0005_14501068_2;At_S0005_14501068_3;	-	-
At05	At_S0005	p5	TATACTATACTATACTATACTATAC	14521063	GOBAR_AA25348	14518815	14524258	-	GO:0003824|	catalytic activity|	ko00052|	Galactose metabolism |	-	-	At_S0005_14521063_1;At_S0005_14521063_2;At_S0005_14521063_3;	-	-
At05	At_S0005	p6	GAGGCAGAGGCAGAGGCA	14521341	GOBAR_AA25348	14518815	14524258	-	GO:0003824|	catalytic activity|	ko00052|	Galactose metabolism |	-	-	At_S0005_14521341_1;At_S0005_14521341_2;At_S0005_14521341_3;	-	-
At05	At_S0005	p3	GGAGGAGGAGGAGGAGGA	14681857	GOBAR_AA37846	14672164	14682390	-	GO:0005515|	protein binding|	ko03018|	RNA degradation |	K12600	-	-	-	At_S0005_14681857_1;At_S0005_14681857_2;At_S0005_14681857_3;
At05	At_S0005	p3	AATAATAATAATAATAATAAT	14704172	GOBAR_AA38960	14697745	14710932	-	GO:0003676|GO:0005524|GO:0006139|GO:0008026|GO:0016818|GO:0003677|GO:0004003|GO:0005524|GO:0004003|GO:0016818|GO:0005524|	nucleic acid binding|ATP binding|nucleobase-containing compound metabolic process|ATP-dependent helicase activity|hydrolase activity, acting on acid anhydrides, in phosphorus-containing anhydrides|DNA binding|ATP-dependent DNA helicase activity|ATP binding|ATP-dependent DNA helicase activity|hydrolase activity, acting on acid anhydrides, in phosphorus-containing anhydrides|ATP binding|	ko03460|	Fanconi anemia pathway |	K15362	At_S0005_14704172_1;At_S0005_14704172_2;At_S0005_14704172_3;	-	-	-
At05	At_S0005	p3	GAAGAAGAAGAAGAAGAAGAAGAA	14707035	GOBAR_AA38960	14697745	14710932	-	GO:0003676|GO:0005524|GO:0006139|GO:0008026|GO:0016818|GO:0003677|GO:0004003|GO:0005524|GO:0004003|GO:0016818|GO:0005524|	nucleic acid binding|ATP binding|nucleobase-containing compound metabolic process|ATP-dependent helicase activity|hydrolase activity, acting on acid anhydrides, in phosphorus-containing anhydrides|DNA binding|ATP-dependent DNA helicase activity|ATP binding|ATP-dependent DNA helicase activity|hydrolase activity, acting on acid anhydrides, in phosphorus-containing anhydrides|ATP binding|	ko03460|	Fanconi anemia pathway |	K15362	-	-	At_S0005_14707035_1;At_S0005_14707035_2;At_S0005_14707035_3;	-
At05	At_S0005	p3	GAAGAAGAAGAAGAAGAAGAAGAA	14708605	GOBAR_AA38960	14697745	14710932	-	GO:0003676|GO:0005524|GO:0006139|GO:0008026|GO:0016818|GO:0003677|GO:0004003|GO:0005524|GO:0004003|GO:0016818|GO:0005524|	nucleic acid binding|ATP binding|nucleobase-containing compound metabolic process|ATP-dependent helicase activity|hydrolase activity, acting on acid anhydrides, in phosphorus-containing anhydrides|DNA binding|ATP-dependent DNA helicase activity|ATP binding|ATP-dependent DNA helicase activity|hydrolase activity, acting on acid anhydrides, in phosphorus-containing anhydrides|ATP binding|	ko03460|	Fanconi anemia pathway |	K15362	-	-	At_S0005_14708605_1;At_S0005_14708605_2;At_S0005_14708605_3;	-
At05	At_S0005	p6	AAAAACAAAAACAAAAAC	14749599	GOBAR_AA35088	14744651	14749782	-	GO:0004096|GO:0004096|GO:0006979|GO:0020037|GO:0055114|GO:0004096|GO:0020037|GO:0055114|GO:0020037|GO:0020037|GO:0055114|	catalase activity|catalase activity|response to oxidative stress|heme binding|oxidation-reduction process|catalase activity|heme binding|oxidation-reduction process|heme binding|heme binding|oxidation-reduction process|	ko01200|ko00630|ko00380|ko04011|ko04068|ko04146|ko04211|ko04212|ko04213|ko05014|	Carbon metabolism |Glyoxylate and dicarboxylate metabolism |Tryptophan metabolism |MAPK signaling pathway - yeast |FoxO signaling pathway |Peroxisome |Longevity regulating pathway - mammal |Longevity regulating pathway - worm |Longevity regulating pathway - multiple species |Amyotrophic lateral sclerosis (ALS) |	K03781	At_S0005_14749599_1;At_S0005_14749599_2;At_S0005_14749599_3;	-	-	-
At05	At_S0005	p6	CTTCCCCTTCCCCTTCCCCTTCCC	14776855	GOBAR_AA35093	14772571	14779671	+	GO:0004181|GO:0006508|GO:0008270|	metallocarboxypeptidase activity|proteolysis|zinc ion binding|	-	-	-	-	-	At_S0005_14776855_3;	At_S0005_14776855_1;At_S0005_14776855_2;
At05	At_S0005	p3	TCCTCCTCCTCCTCCTCC	15202718	GOBAR_AA40885	15202691	15209687	+	GO:0005515|	protein binding|	ko03018|	RNA degradation |	K12600	-	-	-	At_S0005_15202718_1;At_S0005_15202718_2;At_S0005_15202718_3;
At05	At_S0005	p2	GAGAGAGAGAGAGAGAGAGAGAGA	15241035	GOBAR_AA40891	15239325	15242813	-	GO:0008270|	zinc ion binding|	-	-	-	-	-	At_S0005_15241035_1;At_S0005_15241035_2;At_S0005_15241035_3;	-
At05	At_S0005	p3	TCCTCCTCCTCCTCCTCC	15475304	GOBAR_AA20209	15474704	15475462	-	-	-	-	-	-	-	At_S0005_15475304_1;At_S0005_15475304_2;At_S0005_15475304_3;	-	-
At05	At_S0005	p3	AAGAAGAAGAAGAAGAAGAAGAAGAAGAAGAAGAAG	15517278	GOBAR_AA35456	15514219	15520322	-	GO:0003676|GO:0005524|	nucleic acid binding|ATP binding|	-	-	K13181	-	At_S0005_15517278_1;At_S0005_15517278_2;At_S0005_15517278_3;	-	-
At05	At_S0005	p2	AGAGAGAGAGAGAGAGAG	15680521	GOBAR_AA12301	15677012	15689315	-	GO:0003676|GO:0004527|GO:0003676|GO:0008270|	nucleic acid binding|exonuclease activity|nucleic acid binding|zinc ion binding|	ko03008|ko03018|	Ribosome biogenesis in eukaryotes |RNA degradation |	K12619	-	-	-	At_S0005_15680521_1;At_S0005_15680521_2;At_S0005_15680521_3;
At05	At_S0005	p2	AGAGAGAGAGAGAGAGAG	15681594	GOBAR_AA12301	15677012	15689315	-	GO:0003676|GO:0004527|GO:0003676|GO:0008270|	nucleic acid binding|exonuclease activity|nucleic acid binding|zinc ion binding|	ko03008|ko03018|	Ribosome biogenesis in eukaryotes |RNA degradation |	K12619	-	-	-	At_S0005_15681594_1;At_S0005_15681594_2;At_S0005_15681594_3;
At05	At_S0005	p6	TAAAAATAAAAATAAAAA	16027355	GOBAR_AA23990	16026279	16030385	-	GO:0006508|GO:0008234|GO:0008234|	proteolysis|cysteine-type peptidase activity|cysteine-type peptidase activity|	-	-	-	-	-	At_S0005_16027355_1;At_S0005_16027355_2;At_S0005_16027355_3;	-
At05	At_S0005	p3	CTTCTTCTTCTTCTTCTTCTT	16202544	GOBAR_AA31912	16202324	16206423	+	GO:0005524|GO:0035299|	ATP binding|inositol pentakisphosphate 2-kinase activity|	ko00562|ko04070|	Inositol phosphate metabolism |Phosphatidylinositol signaling system |	K10572	-	At_S0005_16202544_1;At_S0005_16202544_2;At_S0005_16202544_3;	-	-
At05	At_S0005	p1	AAAAAAAAAAAAAAAAAA	16217441	GOBAR_AA31913	16210947	16219773	-	GO:0004146|GO:0006545|GO:0009165|GO:0050661|GO:0055114|GO:0004146|GO:0006545|GO:0009165|GO:0055114|GO:0004146|GO:0055114|	dihydrofolate reductase activity|glycine biosynthetic process|nucleotide biosynthetic process|NADP binding|oxidation-reduction process|dihydrofolate reductase activity|glycine biosynthetic process|nucleotide biosynthetic process|oxidation-reduction process|dihydrofolate reductase activity|oxidation-reduction process|	-	-	-	At_S0005_16217441_1;At_S0005_16217441_2;At_S0005_16217441_3;	-	-	-
At05	At_S0005	p4	CAACCAACCAACCAACCAAC	16223792	GOBAR_AA31914	16222056	16224129	-	GO:0004518|	nuclease activity|	-	-	-	At_S0005_16223792_1;At_S0005_16223792_2;At_S0005_16223792_3;	-	-	-
At05	At_S0005	p1	CCCCCCCCCCCCCCCCCC	16315689	GOBAR_AA06227	16315409	16316541	+	GO:0003677|	DNA binding|	-	-	-	At_S0005_16315689_1;At_S0005_16315689_2;At_S0005_16315689_3;	-	-	-
At05	At_S0005	p5	ATTATATTATATTATATTATATTATATTATATTATATTATATTATATTAT	16397967	GOBAR_AA06218	16396620	16399098	+	-	-	-	-	-	At_S0005_16397967_1;At_S0005_16397967_2;At_S0005_16397967_3;	-	-	-
At05	At_S0005	p5	ATAAAATAAAATAAAATAAA	16514582	GOBAR_AA06205	16514331	16515235	-	GO:0004170|GO:0046080|GO:0016787|GO:0046080|	dUTP diphosphatase activity|dUTP metabolic process|hydrolase activity|dUTP metabolic process|	ko00240|	Pyrimidine metabolism |	K01520	-	-	At_S0005_16514582_1;At_S0005_16514582_2;At_S0005_16514582_3;	-
At05	At_S0005	p6	CAAAGACAAAGACAAAGA	16548507	GOBAR_AA06202	16547798	16548835	+	-	-	-	-	-	-	At_S0005_16548507_1;At_S0005_16548507_2;At_S0005_16548507_3;	-	-
At05	At_S0005	p4	AATAAATAAATAAATAAATA	16712257	GOBAR_AA26480	16712043	16716692	+	-	-	-	-	-	-	-	At_S0005_16712257_1;At_S0005_16712257_2;At_S0005_16712257_3;	-
At05	At_S0005	p2	AGAGAGAGAGAGAGAGAGAG	16803549	GOBAR_AA27092	16802857	16804523	-	GO:0005506|GO:0016705|GO:0020037|GO:0055114|GO:0016705|GO:0055114|	iron ion binding|oxidoreductase activity, acting on paired donors, with incorporation or reduction of molecular oxygen|heme binding|oxidation-reduction process|oxidoreductase activity, acting on paired donors, with incorporation or reduction of molecular oxygen|oxidation-reduction process|	-	-	-	-	At_S0005_16803549_1;At_S0005_16803549_3;	-	At_S0005_16803549_2;
At05	At_S0005	p6	AAAAAGAAAAAGAAAAAG	17213708	GOBAR_AA31573	17213160	17214578	-	-	-	ko03013|ko04120|ko04064|ko05206|	RNA transport |Ubiquitin mediated proteolysis |NF-kappa B signaling pathway |MicroRNAs in cancer |	K10577	-	-	At_S0005_17213708_1;At_S0005_17213708_2;At_S0005_17213708_3;	-
At05	At_S0005	p1	GGGGGGGGGGGGGGGGGGGGGGGGGG	17464626	GOBAR_AA16712	17462146	17465503	+	GO:0005215|GO:0006810|GO:0016020|	transporter activity|transport|membrane|	ko04142|ko04978|	Lysosome |Mineral absorption |	K12347	At_S0005_17464626_1;At_S0005_17464626_2;At_S0005_17464626_3;	-	-	-
At05	At_S0005	p5	GTTTTGTTTTGTTTTGTTTT	17473210	GOBAR_AA16711	17472482	17476756	+	GO:0003723|GO:0005215|GO:0006810|GO:0016020|GO:0005488|	RNA binding|transporter activity|transport|membrane|binding|	-	-	K12347	-	-	At_S0005_17473210_1;At_S0005_17473210_2;At_S0005_17473210_3;	-
At05	At_S0005	p6	GGTGGAGGTGGAGGTGGA	17539785	GOBAR_AA16702	17539485	17541361	+	-	-	-	-	-	-	At_S0005_17539785_1;At_S0005_17539785_2;	At_S0005_17539785_3;	-
At05	At_S0005	p6	GGTGGAGGTGGAGGTGGA	17540893	GOBAR_AA16702	17539485	17541361	+	-	-	-	-	-	-	At_S0005_17540893_1;At_S0005_17540893_2;	At_S0005_17540893_3;	-
At05	At_S0005	p6	TTCAAATTCAAATTCAAA	17615981	GOBAR_AA32983	17612709	17616695	-	-	-	-	-	-	-	At_S0005_17615981_1;At_S0005_17615981_2;At_S0005_17615981_3;	-	-
At05	At_S0005	p6	GGAGGTGGAGGTGGAGGTGGAGGT	17682095	GOBAR_AA32973	17679865	17683562	-	GO:0000166|GO:0003676|	nucleotide binding|nucleic acid binding|	-	-	-	-	At_S0005_17682095_1;At_S0005_17682095_2;At_S0005_17682095_3;	-	-
At05	At_S0005	p3	ACTACTACTACTACTACT	17829821	GOBAR_AA23677	17829767	17833208	+	GO:0005524|GO:0005634|GO:0006355|GO:0005634|GO:0006351|GO:0032502|	ATP binding|nucleus|regulation of transcription, DNA-templated|nucleus|transcription, DNA-templated|developmental process|	-	-	-	At_S0005_17829821_1;At_S0005_17829821_3;	At_S0005_17829821_2;	-	-
At05	At_S0005	p5	TTTTATTTTATTTTATTTTA	17830647	GOBAR_AA23677	17829767	17833208	+	GO:0005524|GO:0005634|GO:0006355|GO:0005634|GO:0006351|GO:0032502|	ATP binding|nucleus|regulation of transcription, DNA-templated|nucleus|transcription, DNA-templated|developmental process|	-	-	-	-	At_S0005_17830647_1;At_S0005_17830647_2;At_S0005_17830647_3;	-	-
At05	At_S0005	p1	TTTTTTTTTTTTTTTTTTTT	17831200	GOBAR_AA23677	17829767	17833208	+	GO:0005524|GO:0005634|GO:0006355|GO:0005634|GO:0006351|GO:0032502|	ATP binding|nucleus|regulation of transcription, DNA-templated|nucleus|transcription, DNA-templated|developmental process|	-	-	-	-	At_S0005_17831200_1;At_S0005_17831200_2;At_S0005_17831200_3;	-	-
At05	At_S0005	p3	AGAAGAAGAAGAAGAAGA	17974249	GOBAR_AA21500	17973050	17976395	-	GO:0003677|	DNA binding|	-	-	K09422	-	-	At_S0005_17974249_1;At_S0005_17974249_2;At_S0005_17974249_3;	-
At05	At_S0005	p3	AGAAGAAGAAGAAGAAGA	17975417	GOBAR_AA21500	17973050	17976395	-	GO:0003677|	DNA binding|	-	-	K09422	-	-	At_S0005_17975417_1;At_S0005_17975417_2;At_S0005_17975417_3;	-
At05	At_S0005	p3	TGATGATGATGATGATGATGATGA	18060730	GOBAR_AA21505	18058539	18065780	+	-	-	-	-	-	-	-	At_S0005_18060730_2;	At_S0005_18060730_1;At_S0005_18060730_3;
At05	At_S0005	p4	TGTATGTATGTATGTATGTATGTATGTA	18142401	GOBAR_AA21514	18141908	18142630	-	-	-	-	-	-	-	At_S0005_18142401_1;At_S0005_18142401_2;At_S0005_18142401_3;	-	-
At05	At_S0005	p3	TAATAATAATAATAATAATAATAATAATAATAA	18339017	GOBAR_AA29464	18337941	18340811	-	-	-	-	-	-	At_S0005_18339017_1;At_S0005_18339017_2;At_S0005_18339017_3;	-	-	-
At05	At_S0005	p3	ATTATTATTATTATTATTATTATTATT	18368576	GOBAR_AA29466	18366527	18369394	+	GO:0046983|	protein dimerization activity|	-	-	-	At_S0005_18368576_1;At_S0005_18368576_2;At_S0005_18368576_3;	-	-	-
At05	At_S0005	p6	TGAACCTGAACCTGAACCTGAACC	18440919	GOBAR_AA28887	18440808	18450717	-	-	-	-	-	-	At_S0005_18440919_1;At_S0005_18440919_2;At_S0005_18440919_3;	-	-	-
At05	At_S0005	p6	TCCTCATCCTCATCCTCATCCTCA	18570754	GOBAR_AA17142	18562938	18579360	-	GO:0004842|GO:0005515|	ubiquitin-protein transferase activity|protein binding|	ko04120|	Ubiquitin mediated proteolysis |	K10592	-	At_S0005_18570754_2;	At_S0005_18570754_3;	At_S0005_18570754_1;
At05	At_S0005	p6	GATGAGGATGAGGATGAGGATGAG	18746101	GOBAR_AA17153	18737684	18751101	+	GO:0004842|GO:0005515|	ubiquitin-protein transferase activity|protein binding|	ko04120|	Ubiquitin mediated proteolysis |	K10592	-	At_S0005_18746101_2;	At_S0005_18746101_3;	At_S0005_18746101_1;
At05	At_S0005	p6	TCGGCTTCGGCTTCGGCT	18757066	GOBAR_AA17155	18756660	18757298	-	GO:0005515|	protein binding|	-	-	-	-	-	At_S0005_18757066_1;At_S0005_18757066_2;At_S0005_18757066_3;	-
At05	At_S0005	p2	TCTCTCTCTCTCTCTCTCTCTC	18778928	GOBAR_AA39078	18778762	18785411	+	GO:0003777|GO:0005524|GO:0007018|GO:0003777|GO:0005524|GO:0007018|GO:0008017|GO:0003777|GO:0007018|	microtubule motor activity|ATP binding|microtubule-based movement|microtubule motor activity|ATP binding|microtubule-based movement|microtubule binding|microtubule motor activity|microtubule-based movement|	-	-	K10395	-	At_S0005_18778928_1;At_S0005_18778928_2;At_S0005_18778928_3;	-	-
At05	At_S0005	p6	TCGGCTTCGGCTTCGGCT	18817848	GOBAR_AA39082	18817442	18818080	-	GO:0005515|	protein binding|	-	-	-	-	-	At_S0005_18817848_1;At_S0005_18817848_2;At_S0005_18817848_3;	-
At05	At_S0005	p6	CATCAACATCAACATCAA	18878517	GOBAR_AA31339	18878436	18879386	+	-	-	-	-	-	-	-	At_S0005_18878517_1;At_S0005_18878517_2;At_S0005_18878517_3;	-
At05	At_S0005	p4	GACAGACAGACAGACAGACAGACA	18963735	GOBAR_AA09021	18963275	18970949	-	GO:0004347|GO:0006094|GO:0006096|	glucose-6-phosphate isomerase activity|gluconeogenesis|glycolytic process|	ko01200|ko00010|ko00030|ko00500|ko00520|	Carbon metabolism |Glycolysis / Gluconeogenesis |Pentose phosphate pathway |Starch and sucrose metabolism |Amino sugar and nucleotide sugar metabolism |	K01810	-	At_S0005_18963735_1;At_S0005_18963735_2;At_S0005_18963735_3;	-	-
At05	At_S0005	p6	AAGAGGAAGAGGAAGAGG	18982147	GOBAR_AA09024	18980634	18982264	-	GO:0010038|	response to metal ion|	-	-	K03926	At_S0005_18982147_1;At_S0005_18982147_2;At_S0005_18982147_3;	-	-	-
At05	At_S0005	p4	TTTATTTATTTATTTATTTA	19021646	GOBAR_AA09028	19021019	19030944	+	GO:0005515|	protein binding|	-	-	K11807	At_S0005_19021646_1;At_S0005_19021646_2;	At_S0005_19021646_3;	-	-
At05	At_S0005	p6	CTTTTTCTTTTTCTTTTT	19029199	GOBAR_AA09028	19021019	19030944	+	GO:0005515|	protein binding|	-	-	K11807	-	At_S0005_19029199_1;At_S0005_19029199_2;At_S0005_19029199_3;	-	-
At05	At_S0005	p3	AAGAAGAAGAAGAAGAAGAAGAAG	19074920	GOBAR_AA09032	19070739	19077177	+	GO:0005515|	protein binding|	-	-	-	At_S0005_19074920_1;At_S0005_19074920_2;At_S0005_19074920_3;	-	-	-
At05	At_S0005	p6	CCAAAGCCAAAGCCAAAG	19085339	GOBAR_AA09034	19085175	19088858	+	GO:0004639|GO:0006164|GO:0005524|	phosphoribosylaminoimidazolesuccinocarboxamide synthase activity|purine nucleotide biosynthetic process|ATP binding|	ko00230|	Purine metabolism |	K01923	-	-	At_S0005_19085339_1;At_S0005_19085339_2;At_S0005_19085339_3;	-
At05	At_S0005	p6	TGAGGCTGAGGCTGAGGC	19308941	GOBAR_AA37495	19308166	19309200	-	-	-	-	-	-	At_S0005_19308941_1;At_S0005_19308941_2;At_S0005_19308941_3;	-	-	-
At05	At_S0005	p5	GAAAAGAAAAGAAAAGAAAAGAAAA	19449655	GOBAR_AA17750	19449202	19454183	+	GO:0000166|GO:0003676|	nucleotide binding|nucleic acid binding|	-	-	-	-	At_S0005_19449655_1;At_S0005_19449655_2;At_S0005_19449655_3;	-	-
At05	At_S0005	p2	GAGAGAGAGAGAGAGAGAGAGAGAGA	19652013	GOBAR_AA40411	19649606	19659649	-	-	-	-	-	-	-	-	-	At_S0005_19652013_1;At_S0005_19652013_2;At_S0005_19652013_3;
At05	At_S0005	p2	GAGAGAGAGAGAGAGAGAGAGAGAGA	19655588	GOBAR_AA40411	19649606	19659649	-	-	-	-	-	-	-	-	-	At_S0005_19655588_1;At_S0005_19655588_2;At_S0005_19655588_3;
At05	At_S0005	p6	AATTTGAATTTGAATTTG	19657157	GOBAR_AA40411	19649606	19659649	-	-	-	-	-	-	-	-	At_S0005_19657157_1;At_S0005_19657157_2;At_S0005_19657157_3;	-
At05	At_S0005	p6	TCTTCATCTTCATCTTCA	19878577	GOBAR_AA12946	19878099	19879052	-	-	-	-	-	-	-	At_S0005_19878577_1;At_S0005_19878577_2;At_S0005_19878577_3;	-	-
At05	At_S0005	p3	GGTGGTGGTGGTGGTGGTGGTGGTGGT	19878959	GOBAR_AA12946	19878099	19879052	-	-	-	-	-	-	-	At_S0005_19878959_1;At_S0005_19878959_2;At_S0005_19878959_3;	-	-
At05	At_S0005	p6	GAAGGGGAAGGGGAAGGGGAAGGGGAAGGG	19984914	GOBAR_AA34392	19984003	19985053	-	GO:0003677|GO:0003700|GO:0006355|	DNA binding|transcription factor activity, sequence-specific DNA binding|regulation of transcription, DNA-templated|	-	-	K09286	-	At_S0005_19984914_1;At_S0005_19984914_2;At_S0005_19984914_3;	-	-
At05	At_S0005	p3	AATAATAATAATAATAATAATAATAATAATAAT	20204440	GOBAR_AA16647	20201194	20205697	+	GO:0016020|GO:0016760|GO:0030244|	membrane|cellulose synthase (UDP-forming) activity|cellulose biosynthetic process|	-	-	-	-	-	-	-
At05	At_S0005	p1	AAAAAAAAAAAAAAAAAAAAAAAAAAAAAAAAAAAA	20481854	GOBAR_AA01839	20481237	20484732	-	GO:0003824|GO:0004372|GO:0006544|GO:0006563|GO:0030170|GO:0016740|	catalytic activity|glycine hydroxymethyltransferase activity|glycine metabolic process|L-serine metabolic process|pyridoxal phosphate binding|transferase activity|	ko01200|ko01230|ko00630|ko00680|ko00260|ko00460|ko00670|	Carbon metabolism |Biosynthesis of amino acids |Glyoxylate and dicarboxylate metabolism |Methane metabolism |Glycine, serine and threonine metabolism |Cyanoamino acid metabolism |One carbon pool by folate |	K00600	-	At_S0005_20481854_1;At_S0005_20481854_2;At_S0005_20481854_3;	-	-
At05	At_S0005	p3	ATCATCATCATCATCATC	20516499	GOBAR_AA01836	20515875	20517203	-	GO:0003743|GO:0006413|GO:0005488|GO:0005515|	translation initiation factor activity|translational initiation|binding|protein binding|	ko03013|ko04214|	RNA transport |Apoptosis -fly |	K03262	-	At_S0005_20516499_1;At_S0005_20516499_3;	-	At_S0005_20516499_2;
At05	At_S0005	p4	TTATTTATTTATTTATTTAT	20558670	GOBAR_AA01834	20558463	20568224	+	GO:0006486|GO:0008378|GO:0016020|	protein glycosylation|galactosyltransferase activity|membrane|	-	-	-	At_S0005_20558670_2;	-	At_S0005_20558670_1;At_S0005_20558670_3;	-
At05	At_S0005	p6	GGTGGCGGTGGCGGTGGC	20710259	GOBAR_AA01821	20709935	20710529	+	GO:0003676|GO:0003677|GO:0006355|	nucleic acid binding|DNA binding|regulation of transcription, DNA-templated|	-	-	-	-	At_S0005_20710259_1;At_S0005_20710259_2;At_S0005_20710259_3;	-	-
At05	At_S0005	p6	TCTCTGTCTCTGTCTCTG	20784243	GOBAR_AA01815	20784000	20785483	+	-	-	-	-	-	-	At_S0005_20784243_1;At_S0005_20784243_2;At_S0005_20784243_3;	-	-
At05	At_S0005	p3	CTTCTTCTTCTTCTTCTTCTT	20876482	GOBAR_AA01806	20873917	20878241	-	GO:0003677|	DNA binding|	-	-	-	At_S0005_20876482_1;At_S0005_20876482_2;At_S0005_20876482_3;	-	-	-
At05	At_S0005	p6	AAATGAAAATGAAAATGA	20982970	GOBAR_AA01793	20979191	20983632	+	GO:0003824|GO:0004655|GO:0033014|GO:0046872|	catalytic activity|porphobilinogen synthase activity|tetrapyrrole biosynthetic process|metal ion binding|	ko00860|	Porphyrin and chlorophyll metabolism |	K01698	At_S0005_20982970_1;At_S0005_20982970_2;At_S0005_20982970_3;	-	-	-
At05	At_S0005	p3	TCATCATCATCATCATCA	21038078	GOBAR_AA37282	21037705	21038352	-	GO:0005515|GO:0008270|	protein binding|zinc ion binding|	-	-	-	-	At_S0005_21038078_1;At_S0005_21038078_2;At_S0005_21038078_3;	-	-
At05	At_S0005	p1	GGGGGGGGGGGGGGGGGGGGGGGGGGGGGGGGGGGGGGGGGGGGGGGGGGGGGGGGGGGGGGGGGGGGGGGGGGGGG	22291952	GOBAR_AA15702	22290620	22293039	+	GO:0008152|GO:0016597|	metabolic process|amino acid binding|	-	-	-	-	-	-	-
At05	At_S0005	p6	GTATATGTATATGTATATGTATATGTATATGTATATGTATATGTATATGTATAT	22311666	GOBAR_AA15703	22308230	22312505	+	GO:0005515|	protein binding|	ko04120|ko04068|ko04110|ko05200|ko05203|ko05222|ko05168|ko05169|	Ubiquitin mediated proteolysis |FoxO signaling pathway |Cell cycle |Pathways in cancer |Viral carcinogenesis |Small cell lung cancer |Herpes simplex infection |Epstein-Barr virus infection |	K03875	At_S0005_22311666_1;At_S0005_22311666_2;At_S0005_22311666_3;	-	-	-
At05	At_S0005	p6	GGCTCAGGCTCAGGCTCA	22356791	GOBAR_AA15707	22355465	22357026	-	-	-	-	-	-	-	-	-	At_S0005_22356791_1;At_S0005_22356791_2;At_S0005_22356791_3;
At05	At_S0005	p2	ACACACACACACACACACACACACACACAC	22564034	GOBAR_AA24055	22563633	22568013	-	GO:0004185|GO:0006508|	serine-type carboxypeptidase activity|proteolysis|	-	-	K13289	-	At_S0005_22564034_1;At_S0005_22564034_2;At_S0005_22564034_3;	-	-
At05	At_S0005	p3	ATCATCATCATCATCATC	22579380	GOBAR_AA24056	22577668	22581563	-	GO:0042274|	ribosomal small subunit biogenesis|	-	-	-	-	-	At_S0005_22579380_1;At_S0005_22579380_2;At_S0005_22579380_3;	-
At05	At_S0005	p3	ATCATCATCATCATCATC	22580583	GOBAR_AA24056	22577668	22581563	-	GO:0042274|	ribosomal small subunit biogenesis|	-	-	-	-	-	At_S0005_22580583_1;At_S0005_22580583_2;At_S0005_22580583_3;	-
At05	At_S0005	p6	GGGTGGGGGTGGGGGTGG	22695380	GOBAR_AA24132	22694713	22696214	-	GO:0005199|GO:0009664|	structural constituent of cell wall|plant-type cell wall organization|	-	-	-	-	-	-	At_S0005_22695380_1;At_S0005_22695380_2;At_S0005_22695380_3;
At05	At_S0005	p3	TCCTCCTCCTCCTCCTCCTCC	22769777	GOBAR_AA30340	22768146	22770515	+	GO:0003677|	DNA binding|	-	-	-	-	At_S0005_22769777_1;At_S0005_22769777_2;At_S0005_22769777_3;	-	-
At05	At_S0005	p3	AAGAAGAAGAAGAAGAAGAAGAAGAAGAAGAAGAAGAAG	22770394	GOBAR_AA30340	22768146	22770515	+	GO:0003677|	DNA binding|	-	-	-	-	At_S0005_22770394_1;At_S0005_22770394_2;At_S0005_22770394_3;	-	-
At05	At_S0005	p2	TCTCTCTCTCTCTCTCTCTCTC	22839290	GOBAR_AA30344	22837897	22842390	+	GO:0003824|GO:0016831|GO:0016831|GO:0019752|GO:0030170|	catalytic activity|carboxy-lyase activity|carboxy-lyase activity|carboxylic acid metabolic process|pyridoxal phosphate binding|	ko00340|	Histidine metabolism |	K01590	-	At_S0005_22839290_1;At_S0005_22839290_2;At_S0005_22839290_3;	-	-
At05	At_S0005	p5	ATATTATATTATATTATATTATATT	23019303	GOBAR_AA32697	23015721	23026590	-	GO:0005975|GO:0016758|GO:0030259|GO:0008152|GO:0016758|	carbohydrate metabolic process|transferase activity, transferring hexosyl groups|lipid glycosylation|metabolic process|transferase activity, transferring hexosyl groups|	-	-	K05841	-	-	-	At_S0005_23019303_1;At_S0005_23019303_2;At_S0005_23019303_3;
At05	At_S0005	p6	TATATGTATATGTATATG	23504635	GOBAR_AA04676	23500455	23504834	-	-	-	-	-	-	At_S0005_23504635_1;At_S0005_23504635_2;At_S0005_23504635_3;	-	-	-
At05	At_S0005	p2	AGAGAGAGAGAGAGAGAGAGAGAGAG	24043179	GOBAR_AA22860	24040199	24043479	-	GO:0015031|	protein transport|	ko04144|	Endocytosis |	-	-	At_S0005_24043179_1;At_S0005_24043179_2;At_S0005_24043179_3;	-	-
At05	At_S0005	p2	CTCTCTCTCTCTCTCTCT	24090563	GOBAR_AA22855	24090254	24099752	+	GO:0006629|GO:0008081|GO:0008889|	lipid metabolic process|phosphoric diester hydrolase activity|glycerophosphodiester phosphodiesterase activity|	-	-	-	-	At_S0005_24090563_1;At_S0005_24090563_2;At_S0005_24090563_3;	-	-
At05	At_S0005	p3	TTATTATTATTATTATTATTATTATTATTATTATTATTATTATTATTATTA	24102534	GOBAR_AA22854	24102289	24105565	+	-	-	-	-	-	-	At_S0005_24102534_1;At_S0005_24102534_2;At_S0005_24102534_3;	-	-
At05	At_S0005	p5	TTCTTTTCTTTTCTTTTCTT	24102813	GOBAR_AA22854	24102289	24105565	+	-	-	-	-	-	-	At_S0005_24102813_1;At_S0005_24102813_2;At_S0005_24102813_3;	-	-
At05	At_S0005	p3	TTCTTCTTCTTCTTCTTCTTC	24108368	GOBAR_AA22853	24108073	24114742	-	GO:0005488|	binding|	-	-	-	At_S0005_24108368_1;At_S0005_24108368_2;At_S0005_24108368_3;	-	-	-
At05	At_S0005	p2	ATATATATATATATATAT	24169410	GOBAR_AA22849	24169303	24171705	+	GO:0005507|GO:0005507|GO:0016491|GO:0055114|GO:0016491|GO:0055114|GO:0046274|GO:0048046|GO:0052716|GO:0055114|	copper ion binding|copper ion binding|oxidoreductase activity|oxidation-reduction process|oxidoreductase activity|oxidation-reduction process|lignin catabolic process|apoplast|hydroquinone:oxygen oxidoreductase activity|oxidation-reduction process|	-	-	-	-	At_S0005_24169410_2;At_S0005_24169410_3;	At_S0005_24169410_1;	-
At05	At_S0005	p6	AAAAAGAAAAAGAAAAAG	24517545	GOBAR_AA36055	24517511	24519546	-	GO:0004553|GO:0005975|GO:0005975|	hydrolase activity, hydrolyzing O-glycosyl compounds|carbohydrate metabolic process|carbohydrate metabolic process|	-	-	-	-	At_S0005_24517545_1;At_S0005_24517545_2;At_S0005_24517545_3;	-	-
At05	At_S0005	p6	AAAAAGAAAAAGAAAAAG	24550157	GOBAR_AA36056	24548527	24553246	+	GO:0003677|GO:0046983|GO:0003700|GO:0005634|GO:0006355|	DNA binding|protein dimerization activity|transcription factor activity, sequence-specific DNA binding|nucleus|regulation of transcription, DNA-templated|	-	-	-	-	-	At_S0005_24550157_1;At_S0005_24550157_2;At_S0005_24550157_3;	-
At05	At_S0005	p3	GCAGCAGCAGCAGCAGCAGCA	24780442	GOBAR_AA28676	24780300	24782781	+	GO:0008942|GO:0042128|GO:0055114|GO:0016491|GO:0051537|GO:0055114|	nitrite reductase [NAD(P)H] activity|nitrate assimilation|oxidation-reduction process|oxidoreductase activity|2 iron, 2 sulfur cluster binding|oxidation-reduction process|	-	-	-	-	At_S0005_24780442_1;At_S0005_24780442_2;At_S0005_24780442_3;	-	-
At05	At_S0005	p6	ATATCTATATCTATATCTATATCTATATCTATATCTATATCT	24816726	GOBAR_AA39552	24816212	24831132	+	GO:0003824|GO:0006482|GO:0052689|	catalytic activity|protein demethylation|carboxylic ester hydrolase activity|	-	-	K13617	-	-	-	-
At05	At_S0005	p2	CTCTCTCTCTCTCTCTCTCTCT	25100428	GOBAR_AA22916	25097006	25101007	+	GO:0005515|	protein binding|	-	-	-	At_S0005_25100428_1;	At_S0005_25100428_2;At_S0005_25100428_3;	-	-
At05	At_S0005	p6	ATTTTTATTTTTATTTTT	25347444	GOBAR_AA12822	25340865	25348717	-	GO:0003676|GO:0004527|GO:0003676|GO:0008270|	nucleic acid binding|exonuclease activity|nucleic acid binding|zinc ion binding|	ko03008|ko03018|	Ribosome biogenesis in eukaryotes |RNA degradation |	K12619	-	At_S0005_25347444_1;At_S0005_25347444_2;At_S0005_25347444_3;	-	-
At05	At_S0005	p2	AGAGAGAGAGAGAGAGAGAGAG	25536675	GOBAR_AA15480	25534089	25537063	-	GO:0003677|GO:0046983|GO:0003700|GO:0005634|GO:0006355|	DNA binding|protein dimerization activity|transcription factor activity, sequence-specific DNA binding|nucleus|regulation of transcription, DNA-templated|	-	-	K09264	-	At_S0005_25536675_1;At_S0005_25536675_2;At_S0005_25536675_3;	-	-
At05	At_S0005	p3	CTTCTTCTTCTTCTTCTT	25569724	GOBAR_AA15479	25569612	25573052	+	GO:0003824|GO:0006367|GO:0005674|GO:0006366|GO:0006367|	catalytic activity|transcription initiation from RNA polymerase II promoter|transcription factor TFIIF complex|transcription from RNA polymerase II promoter|transcription initiation from RNA polymerase II promoter|	ko03022|	Basal transcription factors |	K03139	At_S0005_25569724_2;	At_S0005_25569724_1;At_S0005_25569724_3;	-	-
At05	At_S0005	p3	CTTCTTCTTCTTCTTCTT	25571277	GOBAR_AA15479	25569612	25573052	+	GO:0003824|GO:0006367|GO:0005674|GO:0006366|GO:0006367|	catalytic activity|transcription initiation from RNA polymerase II promoter|transcription factor TFIIF complex|transcription from RNA polymerase II promoter|transcription initiation from RNA polymerase II promoter|	ko03022|	Basal transcription factors |	K03139	-	-	-	-
At05	At_S0005	p3	AGAAGAAGAAGAAGAAGAAGAAGAAGAAGAAGA	25801061	GOBAR_AA33529	25799469	25801551	-	GO:0005515|	protein binding|	-	-	-	-	-	At_S0005_25801061_1;At_S0005_25801061_2;At_S0005_25801061_3;	-
At05	At_S0005	p4	CATACATACATACATACATA	25807240	GOBAR_AA33530	25805036	25807582	-	GO:0003824|GO:0004722|GO:0006470|GO:0043169|	catalytic activity|protein serine/threonine phosphatase activity|protein dephosphorylation|cation binding|	-	-	-	-	-	-	At_S0005_25807240_1;At_S0005_25807240_2;At_S0005_25807240_3;
At05	At_S0005	p1	TTTTTTTTTTTTTTTTTT	26904107	GOBAR_AA19258	26902558	26904328	+	-	-	-	-	K14496	At_S0005_26904107_3;	At_S0005_26904107_1;At_S0005_26904107_2;	-	-
At05	At_S0005	p3	GATGATGATGATGATGAT	26968218	GOBAR_AA19263	26967629	26971559	+	GO:0006952|GO:0016021|	defense response|integral component of membrane|	-	-	K08472	-	At_S0005_26968218_1;At_S0005_26968218_2;At_S0005_26968218_3;	-	-
At05	At_S0005	p6	AAGAAAAAGAAAAAGAAA	26976992	GOBAR_AA19264	26976785	26980541	+	-	-	ko04120|	Ubiquitin mediated proteolysis |	K06688	At_S0005_26976992_1;At_S0005_26976992_2;At_S0005_26976992_3;	-	-	-
At05	At_S0005	p6	AATAAAAATAAAAATAAA	27076759	GOBAR_AA19268	27074939	27078478	+	GO:0004672|GO:0005524|GO:0006468|GO:0004672|GO:0006468|	protein kinase activity|ATP binding|protein phosphorylation|protein kinase activity|protein phosphorylation|	-	-	-	At_S0005_27076759_1;At_S0005_27076759_2;	At_S0005_27076759_3;	-	-
At05	At_S0005	p6	GAAGGAGAAGGAGAAGGA	27373605	GOBAR_AA10708	27373400	27373786	-	GO:0004672|GO:0005524|GO:0006468|GO:0004672|GO:0006468|GO:0005524|	protein kinase activity|ATP binding|protein phosphorylation|protein kinase activity|protein phosphorylation|ATP binding|	-	-	-	-	At_S0005_27373605_1;At_S0005_27373605_2;At_S0005_27373605_3;	-	-
At05	At_S0005	p3	TGATGATGATGATGATGA	27469757	GOBAR_AA10713	27468733	27471463	-	GO:0000166|GO:0003676|	nucleotide binding|nucleic acid binding|	-	-	-	-	At_S0005_27469757_1;At_S0005_27469757_2;At_S0005_27469757_3;	-	-
At05	At_S0005	p2	TCTCTCTCTCTCTCTCTC	28210434	GOBAR_AA05863	28208676	28214609	+	-	-	-	-	-	At_S0005_28210434_1;At_S0005_28210434_2;At_S0005_28210434_3;	-	-	-
At05	At_S0005	p6	GGAGCCGGAGCCGGAGCC	28427616	GOBAR_AA05873	28421217	28427920	-	-	-	-	-	-	-	At_S0005_28427616_1;At_S0005_28427616_2;At_S0005_28427616_3;	-	-
At05	At_S0005	p4	GAAAGAAAGAAAGAAAGAAA	28465381	GOBAR_AA05875	28463801	28465482	-	GO:0033743|GO:0055114|	peptide-methionine (R)-S-oxide reductase activity|oxidation-reduction process|	-	-	-	-	At_S0005_28465381_1;At_S0005_28465381_2;At_S0005_28465381_3;	-	-
At05	At_S0005	p5	TAAAATAAAATAAAATAAAA	28688471	GOBAR_AA21847	28687849	28689509	-	GO:0006631|GO:0045300|GO:0055114|GO:0016491|GO:0055114|	fatty acid metabolic process|acyl-[acyl-carrier-protein] desaturase activity|oxidation-reduction process|oxidoreductase activity|oxidation-reduction process|	-	-	K03921	-	-	-	-
At05	At_S0005	p3	GAGGAGGAGGAGGAGGAG	28790539	GOBAR_AA21852	28782229	28793208	-	-	-	-	-	-	-	-	-	At_S0005_28790539_1;At_S0005_28790539_2;At_S0005_28790539_3;
At05	At_S0005	p6	GGCTCAGGCTCAGGCTCA	29006021	GOBAR_AA17898	29004165	29006418	-	GO:0006810|GO:0016021|	transport|integral component of membrane|	-	-	-	-	At_S0005_29006021_1;At_S0005_29006021_2;At_S0005_29006021_3;	-	-
At05	At_S0005	p2	TATATATATATATATATATA	29155175	GOBAR_AA37467	29154722	29155746	+	GO:0031072|GO:0051082|	heat shock protein binding|unfolded protein binding|	-	-	-	At_S0005_29155175_1;At_S0005_29155175_2;At_S0005_29155175_3;	-	-	-
At05	At_S0005	p2	TATATATATATATATATATATA	29155572	GOBAR_AA37467	29154722	29155746	+	GO:0031072|GO:0051082|	heat shock protein binding|unfolded protein binding|	-	-	-	-	-	At_S0005_29155572_1;At_S0005_29155572_2;At_S0005_29155572_3;	-
At05	At_S0005	p6	CCACTTCCACTTCCACTT	29157673	GOBAR_AA37468	29157629	29158153	-	GO:0004616|GO:0055114|GO:0016491|GO:0055114|GO:0051287|GO:0055114|	phosphogluconate dehydrogenase (decarboxylating) activity|oxidation-reduction process|oxidoreductase activity|oxidation-reduction process|NAD binding|oxidation-reduction process|	ko01200|ko00630|ko00650|	Carbon metabolism |Glyoxylate and dicarboxylate metabolism |Butanoate metabolism |	-	At_S0005_29157673_2;At_S0005_29157673_3;	-	-	At_S0005_29157673_1;
At05	At_S0005	p6	TCCACCTCCACCTCCACC	29158071	GOBAR_AA37468	29157629	29158153	-	GO:0004616|GO:0055114|GO:0016491|GO:0055114|GO:0051287|GO:0055114|	phosphogluconate dehydrogenase (decarboxylating) activity|oxidation-reduction process|oxidoreductase activity|oxidation-reduction process|NAD binding|oxidation-reduction process|	ko01200|ko00630|ko00650|	Carbon metabolism |Glyoxylate and dicarboxylate metabolism |Butanoate metabolism |	-	-	-	-	At_S0005_29158071_1;At_S0005_29158071_2;At_S0005_29158071_3;
At05	At_S0005	p6	CCACTTCCACTTCCACTT	29180514	GOBAR_AA17935	29180384	29182194	-	-	-	-	-	-	-	At_S0005_29180514_1;At_S0005_29180514_2;At_S0005_29180514_3;	-	-
At05	At_S0005	p6	CCACCTCCACCTCCACCT	29180895	GOBAR_AA17935	29180384	29182194	-	-	-	-	-	-	At_S0005_29180895_3;	-	-	At_S0005_29180895_1;At_S0005_29180895_2;
At05	At_S0005	p4	TGGCTGGCTGGCTGGCTGGC	29182073	GOBAR_AA17935	29180384	29182194	-	-	-	-	-	-	-	At_S0005_29182073_3;	At_S0005_29182073_1;At_S0005_29182073_2;	-
At05	At_S0005	p3	AACAACAACAACAACAACAAC	29249057	GOBAR_AA17937	29248304	29249331	+	GO:0003677|	DNA binding|	-	-	K09422	At_S0005_29249057_1;At_S0005_29249057_2;	At_S0005_29249057_3;	-	-
At05	At_S0005	p6	TAAAAATAAAAATAAAAA	29369055	GOBAR_AA25638	29367915	29371767	-	GO:0004601|GO:0006979|GO:0020037|GO:0055114|	peroxidase activity|response to oxidative stress|heme binding|oxidation-reduction process|	-	-	-	At_S0005_29369055_1;At_S0005_29369055_2;At_S0005_29369055_3;	-	-	-
At05	At_S0005	p2	GAGAGAGAGAGAGAGAGA	29371025	GOBAR_AA25638	29367915	29371767	-	GO:0004601|GO:0006979|GO:0020037|GO:0055114|	peroxidase activity|response to oxidative stress|heme binding|oxidation-reduction process|	-	-	-	-	At_S0005_29371025_1;At_S0005_29371025_2;At_S0005_29371025_3;	-	-
At05	At_S0005	p6	CCGGTTCCGGTTCCGGTT	29503518	GOBAR_AA25629	29500340	29503818	-	GO:0003723|GO:0003735|GO:0005622|GO:0005840|GO:0006412|GO:0005840|	RNA binding|structural constituent of ribosome|intracellular|ribosome|translation|ribosome|	ko03010|	Ribosome |	K02888	-	At_S0005_29503518_1;At_S0005_29503518_2;At_S0005_29503518_3;	-	-
At05	At_S0005	p3	AATAATAATAATAATAATAATAATAATAAT	29626666	GOBAR_AA25748	29621410	29634126	-	GO:0004672|GO:0005524|GO:0006468|GO:0005488|	protein kinase activity|ATP binding|protein phosphorylation|binding|	-	-	-	At_S0005_29626666_3;	-	At_S0005_29626666_1;At_S0005_29626666_2;	-
At05	At_S0005	p4	ATACATACATACATACATACATACATAC	29702262	GOBAR_AA25754	29700855	29703805	-	GO:0003824|GO:0050662|	catalytic activity|coenzyme binding|	-	-	-	-	At_S0005_29702262_1;At_S0005_29702262_2;At_S0005_29702262_3;	-	-
At05	At_S0005	p3	TTATTATTATTATTATTA	30644455	GOBAR_AA05392	30643968	30651196	+	GO:0005975|GO:0009045|GO:0009045|	carbohydrate metabolic process|xylose isomerase activity|xylose isomerase activity|	ko00040|ko00051|	Pentose and glucuronate interconversions |Fructose and mannose metabolism |	K01805	-	-	-	-
At05	At_S0005	p6	TTTTTCTTTTTCTTTTTC	30646500	GOBAR_AA05392	30643968	30651196	+	GO:0005975|GO:0009045|GO:0009045|	carbohydrate metabolic process|xylose isomerase activity|xylose isomerase activity|	ko00040|ko00051|	Pentose and glucuronate interconversions |Fructose and mannose metabolism |	K01805	-	-	At_S0005_30646500_1;At_S0005_30646500_2;At_S0005_30646500_3;	-
At05	At_S0005	p6	TTTTTCTTTTTCTTTTTC	30647848	GOBAR_AA05392	30643968	30651196	+	GO:0005975|GO:0009045|GO:0009045|	carbohydrate metabolic process|xylose isomerase activity|xylose isomerase activity|	ko00040|ko00051|	Pentose and glucuronate interconversions |Fructose and mannose metabolism |	K01805	-	-	At_S0005_30647848_1;At_S0005_30647848_2;At_S0005_30647848_3;	-
At05	At_S0005	p5	AAATAAAATAAAATAAAATA	30678845	GOBAR_AA05393	30674331	30680773	+	-	-	-	-	-	At_S0005_30678845_1;At_S0005_30678845_2;At_S0005_30678845_3;	-	-	-
At05	At_S0005	p4	CAAACAAACAAACAAACAAA	30711070	GOBAR_AA05395	30703949	30711205	-	GO:0044237|	cellular metabolic process|	ko03013|	RNA transport |	K03754	-	At_S0005_30711070_1;At_S0005_30711070_2;At_S0005_30711070_3;	-	-
At05	At_S0005	p5	ATAAAATAAAATAAAATAAA	30903186	GOBAR_AA11476	30901413	30904007	-	GO:0016491|	oxidoreductase activity|	-	-	-	-	At_S0005_30903186_1;At_S0005_30903186_2;At_S0005_30903186_3;	-	-
At05	At_S0005	p6	TGAAATTGAAATTGAAATTGAAAT	31021071	GOBAR_AA11470	31020589	31021972	-	GO:0005515|	protein binding|	-	-	-	-	At_S0005_31021071_1;At_S0005_31021071_2;At_S0005_31021071_3;	-	-
At05	At_S0005	p6	TTTTTATTTTTATTTTTATTTTTA	31914275	GOBAR_AA15676	31912154	31915112	+	-	-	-	-	-	-	-	-	At_S0005_31914275_1;At_S0005_31914275_2;At_S0005_31914275_3;
At05	At_S0005	p6	AATAAAAATAAAAATAAA	32543756	GOBAR_AA31081	32541450	32544012	-	-	-	-	-	-	At_S0005_32543756_1;At_S0005_32543756_2;At_S0005_32543756_3;	-	-	-
At05	At_S0005	p6	ATTTTTATTTTTATTTTT	32559752	GOBAR_AA31082	32559520	32564918	+	GO:0004553|GO:0004553|GO:0005975|	hydrolase activity, hydrolyzing O-glycosyl compounds|hydrolase activity, hydrolyzing O-glycosyl compounds|carbohydrate metabolic process|	ko00500|ko00460|ko00940|	Starch and sucrose metabolism |Cyanoamino acid metabolism |Phenylpropanoid biosynthesis |	-	-	At_S0005_32559752_1;At_S0005_32559752_2;At_S0005_32559752_3;	-	-
At05	At_S0005	p4	TATCTATCTATCTATCTATC	32568854	GOBAR_AA31083	32565964	32572533	-	GO:0000287|GO:0005986|GO:0050307|GO:0005524|GO:0006810|GO:0005524|GO:0016887|GO:0005986|GO:0050307|	magnesium ion binding|sucrose biosynthetic process|sucrose-phosphate phosphatase activity|ATP binding|transport|ATP binding|ATPase activity|sucrose biosynthetic process|sucrose-phosphate phosphatase activity|	-	-	-	At_S0005_32568854_1;At_S0005_32568854_2;At_S0005_32568854_3;	-	-	-
At05	At_S0005	p1	TTTTTTTTTTTTTTTTTTTT	32580328	GOBAR_AA31084	32578472	32583369	-	GO:0005524|GO:0006810|GO:0005524|GO:0016887|	ATP binding|transport|ATP binding|ATPase activity|	-	-	K09013	-	-	-	-
At05	At_S0005	p6	GAGAGGGAGAGGGAGAGG	32582371	GOBAR_AA31084	32578472	32583369	-	GO:0005524|GO:0006810|GO:0005524|GO:0016887|	ATP binding|transport|ATP binding|ATPase activity|	-	-	K09013	-	-	-	-
At05	At_S0005	p6	AACACCAACACCAACACC	32697757	GOBAR_AA29795	32696552	32698052	-	GO:0000160|GO:0004871|	phosphorelay signal transduction system|signal transducer activity|	ko04075|	Plant hormone signal transduction |	K14490	-	At_S0005_32697757_1;At_S0005_32697757_2;At_S0005_32697757_3;	-	-
At05	At_S0005	p3	TCTTCTTCTTCTTCTTCTTCTTCT	32965866	GOBAR_AA25087	32965632	32971639	+	GO:0004672|GO:0004672|GO:0005524|GO:0006468|GO:0004672|GO:0006468|GO:0005524|	protein kinase activity|protein kinase activity|ATP binding|protein phosphorylation|protein kinase activity|protein phosphorylation|ATP binding|	ko04075|	Plant hormone signal transduction |	K14510	-	-	-	At_S0005_32965866_1;At_S0005_32965866_2;At_S0005_32965866_3;
At05	At_S0005	p2	ATATATATATATATATATATATATATATAT	33070979	GOBAR_AA25090	33070573	33071721	-	-	-	-	-	-	-	-	At_S0005_33070979_1;At_S0005_33070979_2;At_S0005_33070979_3;	-
At05	At_S0005	p2	ATATATATATATATATAT	33079575	GOBAR_AA25091	33078738	33080678	+	-	-	-	-	-	-	At_S0005_33079575_1;At_S0005_33079575_2;At_S0005_33079575_3;	-	-
At05	At_S0005	p3	TTATTATTATTATTATTATTATTATTATTATTATTATTATTATTATTATTA	33088734	GOBAR_AA25092	33084031	33089494	-	GO:0005515|GO:0008270|	protein binding|zinc ion binding|	-	-	-	-	At_S0005_33088734_1;At_S0005_33088734_2;At_S0005_33088734_3;	-	-
At05	At_S0005	p6	CTATTCCTATTCCTATTC	33200062	GOBAR_AA28438	33196964	33207261	-	GO:0005524|GO:0016887|GO:0016020|	ATP binding|ATPase activity|membrane|	-	-	-	-	At_S0005_33200062_1;At_S0005_33200062_2;At_S0005_33200062_3;	-	-
At05	At_S0005	p4	GTTTGTTTGTTTGTTTGTTT	33203263	GOBAR_AA28438	33196964	33207261	-	GO:0005524|GO:0016887|GO:0016020|	ATP binding|ATPase activity|membrane|	-	-	-	At_S0005_33203263_1;At_S0005_33203263_2;At_S0005_33203263_3;	-	-	-
At05	At_S0005	p4	GTTTGTTTGTTTGTTTGTTT	33205611	GOBAR_AA28438	33196964	33207261	-	GO:0005524|GO:0016887|GO:0016020|	ATP binding|ATPase activity|membrane|	-	-	-	At_S0005_33205611_1;At_S0005_33205611_2;At_S0005_33205611_3;	-	-	-
At05	At_S0005	p2	GTGTGTGTGTGTGTGTGTGT	33317174	GOBAR_AA32388	33311049	33323815	+	GO:0003824|GO:0004553|GO:0005975|GO:0005975|GO:0005975|GO:0051060|	catalytic activity|hydrolase activity, hydrolyzing O-glycosyl compounds|carbohydrate metabolic process|carbohydrate metabolic process|carbohydrate metabolic process|pullulanase activity|	-	-	-	At_S0005_33317174_1;At_S0005_33317174_2;At_S0005_33317174_3;	-	-	-
At05	At_S0005	p6	TTTTATTTTTATTTTTAT	34388145	GOBAR_AA37569	34386298	34388395	+	GO:0005524|GO:0016887|GO:0016020|	ATP binding|ATPase activity|membrane|	-	-	-	At_S0005_34388145_1;At_S0005_34388145_2;At_S0005_34388145_3;	-	-	-
At05	At_S0005	p6	CGTCGCCGTCGCCGTCGCCGTCGCCGTCGC	34491611	GOBAR_AA19070	34487060	34491688	-	GO:0003677|GO:0006355|	DNA binding|regulation of transcription, DNA-templated|	-	-	-	-	At_S0005_34491611_1;At_S0005_34491611_2;At_S0005_34491611_3;	-	-
At05	At_S0005	p3	TTATTATTATTATTATTA	34526639	GOBAR_AA19074	34525326	34528311	+	GO:0005515|GO:0008270|GO:0035556|GO:0047134|GO:0055114|	protein binding|zinc ion binding|intracellular signal transduction|protein-disulfide reductase activity|oxidation-reduction process|	-	-	-	-	At_S0005_34526639_1;At_S0005_34526639_2;At_S0005_34526639_3;	-	-
At05	At_S0005	p1	AAAAAAAAAAAAAAAAAAAAAAAAAA	34526822	GOBAR_AA19074	34525326	34528311	+	GO:0005515|GO:0008270|GO:0035556|GO:0047134|GO:0055114|	protein binding|zinc ion binding|intracellular signal transduction|protein-disulfide reductase activity|oxidation-reduction process|	-	-	-	At_S0005_34526822_1;At_S0005_34526822_2;At_S0005_34526822_3;	-	-	-
At05	At_S0005	p4	AAATAAATAAATAAATAAAT	34713474	GOBAR_AA02429	34711293	34714626	+	-	-	ko00040|	Pentose and glucuronate interconversions |	K01728	-	-	At_S0005_34713474_1;At_S0005_34713474_2;At_S0005_34713474_3;	-
At05	At_S0005	p4	AAATAAATAAATAAATAAAT	34714127	GOBAR_AA02429	34711293	34714626	+	-	-	ko00040|	Pentose and glucuronate interconversions |	K01728	At_S0005_34714127_1;At_S0005_34714127_2;At_S0005_34714127_3;	-	-	-
At05	At_S0005	p6	TGAGCGTGAGCGTGAGCG	35329924	GOBAR_AA30315	35326769	35331546	-	GO:0000166|GO:0003676|GO:0003723|GO:0005634|GO:0006397|	nucleotide binding|nucleic acid binding|RNA binding|nucleus|mRNA processing|	ko03040|	Spliceosome |	K12837	At_S0005_35329924_1;At_S0005_35329924_2;At_S0005_35329924_3;	-	-	-
At05	At_S0005	p5	AAATAAAATAAAATAAAATA	35610576	GOBAR_AA28186	35607607	35614709	+	-	-	ko04727|ko04723|ko04721|ko05032|ko05033|	GABAergic synapse |Retrograde endocannabinoid signaling |Synaptic vesicle cycle |Morphine addiction |Nicotine addiction |	K15015	-	At_S0005_35610576_1;At_S0005_35610576_2;At_S0005_35610576_3;	-	-
At05	At_S0005	p3	ACCACCACCACCACCACCACC	36042316	GOBAR_AA04360	36039470	36043867	-	GO:0043531|	ADP binding|	-	-	-	-	-	At_S0005_36042316_2;	At_S0005_36042316_1;At_S0005_36042316_3;
At05	At_S0005	p6	ATATACATATACATATAC	37263383	GOBAR_AA14966	37262587	37264738	-	GO:0005515|	protein binding|	-	-	-	At_S0005_37263383_1;At_S0005_37263383_2;At_S0005_37263383_3;	-	-	-
At05	At_S0005	p3	TGGTGGTGGTGGTGGTGG	37692597	GOBAR_AA25313	37692036	37693697	-	GO:0005515|	protein binding|	-	-	-	At_S0005_37692597_1;	At_S0005_37692597_2;At_S0005_37692597_3;	-	-
At05	At_S0005	p3	CATCATCATCATCATCATCATCATCAT	37692787	GOBAR_AA25313	37692036	37693697	-	GO:0005515|	protein binding|	-	-	-	At_S0005_37692787_1;At_S0005_37692787_2;At_S0005_37692787_3;	-	-	-
At05	At_S0005	p3	AAGAAGAAGAAGAAGAAG	37780126	GOBAR_AA23371	37776865	37780452	-	GO:0005509|GO:0009523|GO:0009654|GO:0015979|GO:0019898|	calcium ion binding|photosystem II|photosystem II oxygen evolving complex|photosynthesis|extrinsic component of membrane|	ko00195|	Photosynthesis |	K02717	-	At_S0005_37780126_1;At_S0005_37780126_2;At_S0005_37780126_3;	-	-
At05	At_S0005	p6	ATTTTTATTTTTATTTTT	38360146	GOBAR_AA06798	38358770	38360760	+	GO:0003824|GO:0008152|	catalytic activity|metabolic process|	-	-	-	At_S0005_38360146_1;At_S0005_38360146_2;At_S0005_38360146_3;	-	-	-
At05	At_S0005	p5	ATTTTATTTTATTTTATTTT	38756384	GOBAR_AA36999	38752876	38756825	+	GO:0003824|GO:0003824|GO:0051536|GO:0005737|GO:0006364|GO:0008173|GO:0030488|GO:0070475|	catalytic activity|catalytic activity|iron-sulfur cluster binding|cytoplasm|rRNA processing|RNA methyltransferase activity|tRNA methylation|rRNA base methylation|	-	-	K06941	At_S0005_38756384_1;At_S0005_38756384_3;	At_S0005_38756384_2;	-	-
At05	At_S0005	p6	AAAACGAAAACGAAAACG	39270287	GOBAR_AA04234	39269165	39273170	+	-	-	-	-	-	-	At_S0005_39270287_1;At_S0005_39270287_2;At_S0005_39270287_3;	-	-
At05	At_S0005	p6	AGTGATAGTGATAGTGAT	39880020	GOBAR_AA34199	39879401	39881365	+	-	-	-	-	-	At_S0005_39880020_1;At_S0005_39880020_2;At_S0005_39880020_3;	-	-	-
At05	At_S0005	p3	TTGTTGTTGTTGTTGTTG	40526486	GOBAR_AA03115	40526287	40528201	-	-	-	-	-	-	-	At_S0005_40526486_1;At_S0005_40526486_2;At_S0005_40526486_3;	-	-
At05	At_S0005	p2	ATATATATATATATATATATATATAT	40754586	GOBAR_AA03120	40754508	40756930	+	-	-	-	-	-	At_S0005_40754586_1;At_S0005_40754586_2;At_S0005_40754586_3;	-	-	-
At05	At_S0005	p3	CTTCTTCTTCTTCTTCTTCTTCTTCTTCTTCTTCTTCTTCTT	40755255	GOBAR_AA03120	40754508	40756930	+	-	-	-	-	-	-	-	At_S0005_40755255_1;At_S0005_40755255_2;At_S0005_40755255_3;	-
At05	At_S0005	p3	TTATTATTATTATTATTA	40926748	GOBAR_AA26118	40926071	40929482	+	GO:0004672|GO:0005524|GO:0006468|GO:0004672|GO:0006468|GO:0005515|GO:0005524|	protein kinase activity|ATP binding|protein phosphorylation|protein kinase activity|protein phosphorylation|protein binding|ATP binding|	-	-	-	-	-	At_S0005_40926748_1;At_S0005_40926748_2;At_S0005_40926748_3;	-
At05	At_S0005	p6	CCCTGCCCCTGCCCCTGC	41408495	GOBAR_AA01160	41406891	41411610	+	GO:0005524|GO:0019538|	ATP binding|protein metabolic process|	-	-	-	-	At_S0005_41408495_1;At_S0005_41408495_2;At_S0005_41408495_3;	-	-
At05	At_S0005	p6	TAGCTCTAGCTCTAGCTC	41795748	GOBAR_AA01167	41795633	41797207	+	GO:0016787|	hydrolase activity|	-	-	-	-	-	-	At_S0005_41795748_1;At_S0005_41795748_2;At_S0005_41795748_3;
At05	At_S0005	p5	TTCAGTTCAGTTCAGTTCAGTTCAG	42987527	GOBAR_AA29963	42985256	42990762	-	-	-	-	-	-	-	-	-	-
At05	At_S0005	p3	CTGCTGCTGCTGCTGCTG	42989789	GOBAR_AA29963	42985256	42990762	-	-	-	-	-	-	-	-	-	At_S0005_42989789_1;At_S0005_42989789_2;At_S0005_42989789_3;
At05	At_S0005	p3	CCTCCTCCTCCTCCTCCT	42990620	GOBAR_AA29963	42985256	42990762	-	-	-	-	-	-	-	-	-	At_S0005_42990620_1;At_S0005_42990620_2;At_S0005_42990620_3;
At05	At_S0005	p6	TCATTGTCATTGTCATTG	43246567	GOBAR_AA05029	43246375	43247375	+	GO:0003677|	DNA binding|	-	-	-	-	At_S0005_43246567_1;At_S0005_43246567_2;At_S0005_43246567_3;	-	-
At05	At_S0005	p3	GTTGTTGTTGTTGTTGTTGTT	43465730	GOBAR_AA05036	43464759	43470536	+	GO:0005488|GO:0043550|GO:0070772|	binding|regulation of lipid kinase activity|PAS complex|	-	-	K15305	At_S0005_43465730_2;	At_S0005_43465730_1;At_S0005_43465730_3;	-	-
At05	At_S0005	p5	AAATTAAATTAAATTAAATT	44253380	GOBAR_AA16732	44250671	44262033	-	-	-	-	-	-	-	-	-	At_S0005_44253380_1;At_S0005_44253380_2;At_S0005_44253380_3;
At05	At_S0005	p4	GTTTGTTTGTTTGTTTGTTT	44475105	GOBAR_AA22318	44469209	44475572	-	GO:0016972|GO:0055114|GO:0045454|	thiol oxidase activity|oxidation-reduction process|cell redox homeostasis|	-	-	-	-	At_S0005_44475105_1;At_S0005_44475105_2;At_S0005_44475105_3;	-	-
At05	At_S0005	p6	CGTCTCCGTCTCCGTCTC	44491773	GOBAR_AA22319	44491721	44492569	+	-	-	-	-	-	-	-	At_S0005_44491773_1;At_S0005_44491773_2;At_S0005_44491773_3;	-
At05	At_S0005	p6	CGGCGACGGCGACGGCGA	44492457	GOBAR_AA22319	44491721	44492569	+	-	-	-	-	-	-	-	At_S0005_44492457_1;At_S0005_44492457_2;At_S0005_44492457_3;	-
At05	At_S0005	p6	ACATTCACATTCACATTC	44601761	GOBAR_AA32221	44601607	44602811	+	GO:0008171|	O-methyltransferase activity|	-	-	K00588	At_S0005_44601761_1;At_S0005_44601761_2;At_S0005_44601761_3;	-	-	-
At05	At_S0005	p1	TTTTTTTTTTTTTTTTTTTTTTT	45594983	GOBAR_AA25611	45593578	45597267	+	GO:0004316|GO:0006633|GO:0051287|GO:0055114|GO:0008152|GO:0016491|GO:0016491|	3-oxoacyl-[acyl-carrier-protein] reductase (NADPH) activity|fatty acid biosynthetic process|NAD binding|oxidation-reduction process|metabolic process|oxidoreductase activity|oxidoreductase activity|	ko01212|ko00061|ko01040|ko00780|	Fatty acid metabolism |Fatty acid biosynthesis |Biosynthesis of unsaturated fatty acids |Biotin metabolism |	K00059	At_S0005_45594983_1;At_S0005_45594983_2;At_S0005_45594983_3;	-	-	-
At05	At_S0005	p3	TCATCATCATCATCATCATCA	46209009	GOBAR_AA16314	46203606	46209341	-	-	-	-	-	-	At_S0005_46209009_1;At_S0005_46209009_2;At_S0005_46209009_3;	-	-	-
At05	At_S0005	p2	TATATATATATATATATA	46591669	GOBAR_AA14938	46590293	46592429	-	-	-	-	-	-	At_S0005_46591669_1;At_S0005_46591669_3;	At_S0005_46591669_2;	-	-
At05	At_S0005	p3	ATTATTATTATTATTATT	48300595	GOBAR_AA04722	48300427	48302294	+	GO:0003830|GO:0006487|GO:0016020|	beta-1,4-mannosylglycoprotein 4-beta-N-acetylglucosaminyltransferase activity|protein N-linked glycosylation|membrane|	ko00510|	N-Glycan biosynthesis |	K00737	-	At_S0005_48300595_1;At_S0005_48300595_2;At_S0005_48300595_3;	-	-
At05	At_S0005	p3	ATTATTATTATTATTATTATTATT	48524676	GOBAR_AA04724	48522852	48525226	+	GO:0005634|GO:0006355|	nucleus|regulation of transcription, DNA-templated|	-	-	-	-	-	At_S0005_48524676_1;At_S0005_48524676_2;At_S0005_48524676_3;	-
At05	At_S0005	p3	ATAATAATAATAATAATA	51760607	GOBAR_AA14801	51758703	51761099	+	GO:0004672|GO:0005524|GO:0006468|GO:0004672|GO:0006468|GO:0005509|GO:0005524|	protein kinase activity|ATP binding|protein phosphorylation|protein kinase activity|protein phosphorylation|calcium ion binding|ATP binding|	ko04626|ko05145|	Plant-pathogen interaction |Toxoplasmosis |	K13412	At_S0005_51760607_1;	At_S0005_51760607_2;At_S0005_51760607_3;	-	-
At05	At_S0005	p2	TCTCTCTCTCTCTCTCTCTCTCTCTC	52019716	GOBAR_AA03881	52017849	52029370	+	-	-	-	-	-	-	At_S0005_52019716_1;At_S0005_52019716_2;At_S0005_52019716_3;	-	-
At05	At_S0005	p3	AGAAGAAGAAGAAGAAGA	52319976	GOBAR_AA00186	52319175	52322781	+	-	-	-	-	-	At_S0005_52319976_1;At_S0005_52319976_2;At_S0005_52319976_3;	-	-	-
At05	At_S0005	p2	TATATATATATATATATA	52321752	GOBAR_AA00186	52319175	52322781	+	-	-	-	-	-	At_S0005_52321752_1;At_S0005_52321752_2;At_S0005_52321752_3;	-	-	-
At05	At_S0005	p3	TTATTATTATTATTATTATTATTATTATTATTATTATTATTATTATTATTATTATTATTATTATTATTA	52493054	GOBAR_AA00188	52490929	52493416	-	GO:0004650|GO:0005975|	polygalacturonase activity|carbohydrate metabolic process|	-	-	-	At_S0005_52493054_1;At_S0005_52493054_2;At_S0005_52493054_3;	-	-	-
At05	At_S0005	p6	TTTTTCTTTTTCTTTTTC	52799165	GOBAR_AA00191	52796136	52799846	+	GO:0004672|GO:0005524|GO:0006468|GO:0004672|GO:0006468|GO:0005524|	protein kinase activity|ATP binding|protein phosphorylation|protein kinase activity|protein phosphorylation|ATP binding|	-	-	-	-	At_S0005_52799165_1;At_S0005_52799165_2;At_S0005_52799165_3;	-	-
At05	At_S0005	p3	CAGCAGCAGCAGCAGCAGCAGCAGCAG	53850397	GOBAR_AA11641	53848686	53851072	+	GO:0005515|	protein binding|	-	-	-	-	At_S0005_53850397_1;At_S0005_53850397_2;At_S0005_53850397_3;	-	-
At05	At_S0005	p3	ATAATAATAATAATAATA	54518294	GOBAR_AA22040	54515840	54521426	-	GO:0004089|GO:0008270|GO:0004089|GO:0008270|GO:0015976|	carbonate dehydratase activity|zinc ion binding|carbonate dehydratase activity|zinc ion binding|carbon utilization|	-	-	K01673	At_S0005_54518294_1;At_S0005_54518294_2;At_S0005_54518294_3;	-	-	-
At05	At_S0005	p6	TATAAATATAAATATAAA	54519670	GOBAR_AA22040	54515840	54521426	-	GO:0004089|GO:0008270|GO:0004089|GO:0008270|GO:0015976|	carbonate dehydratase activity|zinc ion binding|carbonate dehydratase activity|zinc ion binding|carbon utilization|	-	-	K01673	-	-	-	-
At05	At_S0005	p6	GCTTTTGCTTTTGCTTTT	55353595	GOBAR_AA28569	55351855	55356556	+	-	-	-	-	-	-	-	-	At_S0005_55353595_1;At_S0005_55353595_2;At_S0005_55353595_3;
At05	At_S0005	p4	TTTATTTATTTATTTATTTATTTA	58759505	GOBAR_AA02169	58757437	58760053	+	GO:0003824|GO:0004332|GO:0006096|	catalytic activity|fructose-bisphosphate aldolase activity|glycolytic process|	ko01200|ko01230|ko00010|ko00030|ko00051|ko00710|ko00680|	Carbon metabolism |Biosynthesis of amino acids |Glycolysis / Gluconeogenesis |Pentose phosphate pathway |Fructose and mannose metabolism |Carbon fixation in photosynthetic organisms |Methane metabolism |	K01623	At_S0005_58759505_1;At_S0005_58759505_2;At_S0005_58759505_3;	-	-	-
At05	At_S0005	p6	TTTCTTTTTCTTTTTCTT	61364766	GOBAR_AA08472	61360585	61371896	-	GO:0000166|GO:0000166|GO:0046872|GO:0000287|GO:0004012|GO:0005524|GO:0015914|GO:0016021|GO:0016021|	nucleotide binding|nucleotide binding|metal ion binding|magnesium ion binding|phospholipid-translocating ATPase activity|ATP binding|phospholipid transport|integral component of membrane|integral component of membrane|	-	-	K14802	At_S0005_61364766_1;At_S0005_61364766_2;At_S0005_61364766_3;	-	-	-
At05	At_S0005	p1	AAAAAAAAAAAAAAAAAA	61367959	GOBAR_AA08472	61360585	61371896	-	GO:0000166|GO:0000166|GO:0046872|GO:0000287|GO:0004012|GO:0005524|GO:0015914|GO:0016021|GO:0016021|	nucleotide binding|nucleotide binding|metal ion binding|magnesium ion binding|phospholipid-translocating ATPase activity|ATP binding|phospholipid transport|integral component of membrane|integral component of membrane|	-	-	K14802	At_S0005_61367959_1;At_S0005_61367959_2;At_S0005_61367959_3;	-	-	-
At05	At_S0005	p4	TTTATTTATTTATTTATTTA	61810202	GOBAR_AA37539	61809835	61812350	+	GO:0016787|	hydrolase activity|	-	-	K04382	At_S0005_61810202_1;At_S0005_61810202_2;At_S0005_61810202_3;	-	-	-
At05	At_S0005	p3	AAGAAGAAGAAGAAGAAGAAGAAG	62002136	GOBAR_AA32606	62002070	62007701	+	-	-	-	-	-	-	At_S0005_62002136_1;At_S0005_62002136_2;At_S0005_62002136_3;	-	-
At05	At_S0005	p6	GGTGGAGGTGGAGGTGGA	63606204	GOBAR_AA11263	63605683	63606814	+	-	-	-	-	-	-	At_S0005_63606204_1;At_S0005_63606204_2;At_S0005_63606204_3;	-	-
At05	At_S0005	p6	TTTAATTTTAATTTTAATTTTAAT	63942098	GOBAR_AA09778	63937848	63945071	-	GO:0004672|GO:0005524|GO:0006468|GO:0004672|GO:0006468|GO:0005515|	protein kinase activity|ATP binding|protein phosphorylation|protein kinase activity|protein phosphorylation|protein binding|	-	-	-	-	-	At_S0005_63942098_1;At_S0005_63942098_2;At_S0005_63942098_3;	-
At05	At_S0005	p6	AATATAAATATAAATATA	66000860	GOBAR_AA28038	65994902	66001952	+	GO:0006457|GO:0015031|	protein folding|protein transport|	-	-	-	At_S0005_66000860_1;At_S0005_66000860_2;At_S0005_66000860_3;	-	-	-
At05	At_S0005	p6	TTTTTATTTTTATTTTTA	66001574	GOBAR_AA28038	65994902	66001952	+	GO:0006457|GO:0015031|	protein folding|protein transport|	-	-	-	-	At_S0005_66001574_1;At_S0005_66001574_2;At_S0005_66001574_3;	-	-
At05	At_S0005	p6	AAAATAAAAATAAAAATA	67696807	GOBAR_AA40896	67695404	67698976	-	GO:0005524|GO:0006810|GO:0016021|GO:0042626|GO:0055085|GO:0005524|GO:0016887|	ATP binding|transport|integral component of membrane|ATPase activity, coupled to transmembrane movement of substances|transmembrane transport|ATP binding|ATPase activity|	ko02010|ko04071|ko04977|ko05206|	ABC transporters |Sphingolipid signaling pathway |Vitamin digestion and absorption |MicroRNAs in cancer |	-	-	-	-	At_S0005_67696807_1;At_S0005_67696807_2;At_S0005_67696807_3;
At05	At_S0005	p6	TTTTTATTTTTATTTTTA	68702891	GOBAR_AA04928	68702351	68704921	+	GO:0005506|GO:0016491|GO:0055114|GO:0016491|GO:0055114|	iron ion binding|oxidoreductase activity|oxidation-reduction process|oxidoreductase activity|oxidation-reduction process|	-	-	-	-	At_S0005_68702891_1;At_S0005_68702891_2;At_S0005_68702891_3;	-	-
At05	At_S0005	p2	CACACACACACACACACACA	69829765	GOBAR_AA14936	69829266	69832286	-	-	-	ko04075|	Plant hormone signal transduction |	K13463	-	-	At_S0005_69829765_1;At_S0005_69829765_2;At_S0005_69829765_3;	-
At05	At_S0005	p2	CTCTCTCTCTCTCTCTCTCTCTCTCTCTCTCTCTCTCTCT	70488260	GOBAR_AA26655	70484679	70492278	+	GO:0004222|GO:0006508|	metalloendopeptidase activity|proteolysis|	-	-	-	-	At_S0005_70488260_1;At_S0005_70488260_2;At_S0005_70488260_3;	-	-
At05	At_S0005	p3	AAGAAGAAGAAGAAGAAG	70695620	GOBAR_AA24344	70694988	70695938	-	-	-	-	-	-	At_S0005_70695620_1;At_S0005_70695620_2;At_S0005_70695620_3;	-	-	-
At05	At_S0005	p4	TTTCTTTCTTTCTTTCTTTC	72389598	GOBAR_AA22016	72389260	72394259	+	GO:0015079|GO:0016020|GO:0071805|	potassium ion transmembrane transporter activity|membrane|potassium ion transmembrane transport|	-	-	-	At_S0005_72389598_2;At_S0005_72389598_3;	At_S0005_72389598_1;	-	-
At05	At_S0005	p5	TAAAATAAAATAAAATAAAATAAAATAAAA	72695896	GOBAR_AA21442	72690507	72698304	-	GO:0004470|GO:0004471|GO:0006108|GO:0055114|GO:0004471|GO:0051287|GO:0055114|GO:0004471|GO:0055114|	malic enzyme activity|malate dehydrogenase (decarboxylating) (NAD+) activity|malate metabolic process|oxidation-reduction process|malate dehydrogenase (decarboxylating) (NAD+) activity|NAD binding|oxidation-reduction process|malate dehydrogenase (decarboxylating) (NAD+) activity|oxidation-reduction process|	ko01200|ko00620|ko00710|	Carbon metabolism |Pyruvate metabolism |Carbon fixation in photosynthetic organisms |	K00028	At_S0005_72695896_1;At_S0005_72695896_2;At_S0005_72695896_3;	-	-	-
At05	At_S0005	p6	AAAGCTAAAGCTAAAGCT	73059055	GOBAR_AA04694	73058804	73065747	+	GO:0005515|GO:0005634|GO:0008270|GO:0018024|GO:0034968|GO:0016571|GO:0042393|	protein binding|nucleus|zinc ion binding|histone-lysine N-methyltransferase activity|histone lysine methylation|histone methylation|histone binding|	ko00310|ko04211|	Lysine degradation |Longevity regulating pathway - mammal |	-	-	At_S0005_73059055_1;At_S0005_73059055_2;At_S0005_73059055_3;	-	-
At05	At_S0005	p3	TGATGATGATGATGATGA	73406553	GOBAR_AA01278	73406336	73406818	-	GO:0046872|	metal ion binding|	-	-	-	-	-	At_S0005_73406553_1;At_S0005_73406553_2;At_S0005_73406553_3;	-
At05	At_S0005	p3	TGATGATGATGATGATGA	73407703	GOBAR_AA01279	73407486	73407968	-	GO:0046872|	metal ion binding|	-	-	-	-	-	At_S0005_73407703_1;At_S0005_73407703_2;At_S0005_73407703_3;	-
At05	At_S0005	p4	ACATACATACATACATACATACATACAT	73503061	GOBAR_AA01284	73501602	73503249	-	GO:0003677|GO:0006355|	DNA binding|regulation of transcription, DNA-templated|	-	-	-	At_S0005_73503061_1;At_S0005_73503061_2;At_S0005_73503061_3;	-	-	-
At05	At_S0005	p5	AATTTAATTTAATTTAATTTAATTT	74803291	GOBAR_AA11797	74788512	74818154	+	-	-	-	-	-	-	-	-	At_S0005_74803291_1;At_S0005_74803291_2;At_S0005_74803291_3;
At05	At_S0005	p6	TTTTTATTTTTATTTTTA	74808362	GOBAR_AA11797	74788512	74818154	+	-	-	-	-	-	-	-	-	At_S0005_74808362_1;At_S0005_74808362_2;At_S0005_74808362_3;
At05	At_S0005	p2	ATATATATATATATATATAT	75418604	GOBAR_AA27975	75416986	75420336	-	GO:0005506|GO:0016705|GO:0020037|GO:0055114|	iron ion binding|oxidoreductase activity, acting on paired donors, with incorporation or reduction of molecular oxygen|heme binding|oxidation-reduction process|	-	-	-	-	At_S0005_75418604_1;At_S0005_75418604_2;At_S0005_75418604_3;	-	-
At05	At_S0005	p6	GAGGCTGAGGCTGAGGCT	75878818	GOBAR_AA12490	75874376	75878946	+	GO:0005515|	protein binding|	-	-	K12177	At_S0005_75878818_1;At_S0005_75878818_2;At_S0005_75878818_3;	-	-	-
At05	At_S0005	p4	ATAGATAGATAGATAGATAGATAGATAGATAGATAGATAGATAGATAGATAGATAGATAGATAG	75929166	GOBAR_AA12486	75927990	75930525	-	-	-	-	-	-	-	At_S0005_75929166_1;At_S0005_75929166_2;At_S0005_75929166_3;	-	-
At05	At_S0005	p6	GAAAAAGAAAAAGAAAAA	77362678	GOBAR_AA08060	77360054	77362951	-	GO:0004672|GO:0005524|GO:0006468|GO:0004672|GO:0006468|GO:0005524|GO:0006950|	protein kinase activity|ATP binding|protein phosphorylation|protein kinase activity|protein phosphorylation|ATP binding|response to stress|	-	-	-	-	At_S0005_77362678_1;At_S0005_77362678_2;At_S0005_77362678_3;	-	-
At05	At_S0005	p3	CAACAACAACAACAACAACAA	80775643	GOBAR_AA25292	80775604	80777853	+	GO:0005515|	protein binding|	-	-	-	At_S0005_80775643_2;	At_S0005_80775643_1;At_S0005_80775643_3;	-	-
At05	At_S0005	p6	TTTTTATTTTTATTTTTA	80986559	GOBAR_AA29762	80986350	80986962	-	GO:0016702|GO:0055114|	oxidoreductase activity, acting on single donors with incorporation of molecular oxygen, incorporation of two atoms of oxygen|oxidation-reduction process|	ko00906|	Carotenoid biosynthesis |	K09840	-	-	-	At_S0005_80986559_1;At_S0005_80986559_2;At_S0005_80986559_3;
At05	At_S0005	p5	GACAGGACAGGACAGGACAG	81914014	GOBAR_AA05251	81911727	81920963	-	-	-	-	-	-	-	-	-	At_S0005_81914014_1;At_S0005_81914014_2;At_S0005_81914014_3;
At05	At_S0005	p1	TTTTTTTTTTTTTTTTTT	84581495	GOBAR_AA10517	84580389	84582002	+	GO:0043461|	proton-transporting ATP synthase complex assembly|	-	-	K07556	-	At_S0005_84581495_1;At_S0005_84581495_2;At_S0005_84581495_3;	-	-
At05	At_S0005	p3	TTGTTGTTGTTGTTGTTG	85222684	GOBAR_AA20704	85218058	85224236	+	-	-	-	-	-	-	-	-	At_S0005_85222684_1;At_S0005_85222684_2;At_S0005_85222684_3;
At05	At_S0005	p4	AATAAATAAATAAATAAATA	85583143	GOBAR_AA00543	85577089	85583911	-	GO:0003824|GO:0008152|	catalytic activity|metabolic process|	-	-	-	-	At_S0005_85583143_1;At_S0005_85583143_2;At_S0005_85583143_3;	-	-
At05	At_S0005	p6	TTATAATTATAATTATAA	86167123	GOBAR_AA04715	86164785	86167895	-	GO:0000276|GO:0015078|GO:0015986|	mitochondrial proton-transporting ATP synthase complex, coupling factor F(o)|hydrogen ion transmembrane transporter activity|ATP synthesis coupled proton transport|	ko00190|ko05010|ko05012|ko05016|	Oxidative phosphorylation |Alzheimer's disease |Parkinson's disease |Huntington's disease |	K02138	-	-	-	At_S0005_86167123_1;At_S0005_86167123_2;At_S0005_86167123_3;
At05	At_S0005	p6	TCTGATTCTGATTCTGAT	86207370	GOBAR_AA04716	86206245	86208383	-	GO:0005515|	protein binding|	-	-	-	At_S0005_86207370_1;At_S0005_86207370_2;At_S0005_86207370_3;	-	-	-
At05	At_S0005	p5	GTTTTGTTTTGTTTTGTTTT	86930906	GOBAR_AA03307	86930573	86931818	+	GO:0003677|GO:0006355|	DNA binding|regulation of transcription, DNA-templated|	-	-	-	At_S0005_86930906_1;	At_S0005_86930906_2;At_S0005_86930906_3;	-	-
At05	At_S0005	p2	CTCTCTCTCTCTCTCTCT	87523136	GOBAR_AA23561	87522564	87526648	-	GO:0031047|	gene silencing by RNA|	-	-	-	-	At_S0005_87523136_1;At_S0005_87523136_2;At_S0005_87523136_3;	-	-
At05	At_S0005	p2	CTCTCTCTCTCTCTCTCTCT	87824078	GOBAR_AA14136	87823713	87828216	+	GO:0000166|GO:0003676|	nucleotide binding|nucleic acid binding|	ko03040|ko03013|ko03015|ko05168|	Spliceosome |RNA transport |mRNA surveillance pathway |Herpes simplex infection |	K12881	At_S0005_87824078_3;	At_S0005_87824078_1;At_S0005_87824078_2;	-	-
At05	At_S0005	p3	AATAATAATAATAATAATAAT	88160361	GOBAR_AA31290	88159039	88161355	-	GO:0005515|	protein binding|	-	-	-	-	At_S0005_88160361_1;At_S0005_88160361_2;At_S0005_88160361_3;	-	-
At05	At_S0005	p6	AAATTAAAATTAAAATTA	88488958	GOBAR_AA40594	88485887	88491881	-	GO:0016020|	membrane|	-	-	-	-	At_S0005_88488958_1;At_S0005_88488958_2;At_S0005_88488958_3;	-	-
At05	At_S0005	p6	AAAAAGAAAAAGAAAAAG	88913123	GOBAR_AA07054	88902398	88917669	-	-	-	-	-	-	-	At_S0005_88913123_1;At_S0005_88913123_2;At_S0005_88913123_3;	-	-
At05	At_S0005	p5	AAAATAAAATAAAATAAAAT	89105544	GOBAR_AA07057	89103228	89110776	-	-	-	-	-	-	-	-	-	-
At05	At_S0005	p4	AATAAATAAATAAATAAATA	89496918	GOBAR_AA09363	89494981	89497150	-	GO:0004175|GO:0005839|GO:0051603|GO:0004298|GO:0004298|GO:0005839|GO:0051603|	endopeptidase activity|proteasome core complex|proteolysis involved in cellular protein catabolic process|threonine-type endopeptidase activity|threonine-type endopeptidase activity|proteasome core complex|proteolysis involved in cellular protein catabolic process|	ko03050|	Proteasome |	K02739	-	At_S0005_89496918_1;At_S0005_89496918_2;At_S0005_89496918_3;	-	-
[truncated: 7,879 more rows]
