# Supplementary material for: Development and Characterization of SSR Markers in the Gossypium Barbadense Genome
Source: Research Square preprint supplement (doi:10.21203/rs.3.rs-870780/v1), 2021-09-14
Supplement: Supplementary file 2 [file c575d82b3ce923f81b06fd77.xlsx]

## Sheet: Sheet1
Table S8. Detailed information of the 30 G. hirsutum and 27 G. barbadense accessions
No.	Library No.	Name	species
M1-1	M110002	Zhongmiansuo 3	G. hirsutum
M1-2	M110321	Jiangsumian 1	G. hirsutum
M1-3	M110361	Humian 204	G. hirsutum
M1-4	M110491	Shanmian 3	G. hirsutum
M1-5	M110492	Shanmian 4	G. hirsutum
M1-6	M110588	Simian 2	G. hirsutum
M1-7	M110627	Siyang 437	G. hirsutum
M1-8	M110764	Shanmian 5	G. hirsutum
M1-9	M110839	Zhongmiansuo 12	G. hirsutum
M1-10	M111095	Xuzhou 538	G. hirsutum
M1-11	M112285	Sumian 9	G. hirsutum
M1-12	M112295	Jinmian 25	G. hirsutum
M1-13	M112516	Emian 21	G. hirsutum
M1-14	M112691	Yumian 17	G. hirsutum
M1-15	M112714	Han 109	G. hirsutum
M1-16	M112715	Han 284	G. hirsutum
M1-17	M112769	Yu 668	G. hirsutum
M1-18	M112971	Nimian 18	G. hirsutum
M1-19	M112993	Dongtin 1	G. hirsutum
M1-21	M113329	Jinmian 1	G. hirsutum
M1-22	M130006	Deltapine 14A	G. hirsutum
M1-23	M130008	Deltapine 16	G. hirsutum
M1-24	M130023	Coker 100	G. hirsutum
M1-25	M130048	Foster cotton 6	G. hirsutum
M1-26	M130052	Stoneville 4	G. hirsutum
M1-27	M130104	Trice	G. hirsutum
M1-28	M130123	McNair 210	G. hirsutum
M1-29	M130199	Uganda 4	G. hirsutum
M1-30	M140050	Chuanjian 3	G. hirsutum
M1-31	M140053	TM-1	G. hirsutum
M2-1	M210215	65-3080-2	G. barbadense
M2-2	M210009	Giza 30	G. barbadense
M2-3	M210011	Giza 45	G. barbadense
M2-4	M210013	Giza 67	G. barbadense
M2-5	M210020	2365	G. barbadense
M2-6	M210021	Basel 3021	G. barbadense
M2-7	M210036	Ashmoun	G. barbadense
M2-8	M210052	156	G. barbadense
M2-9	M210058	Egyptian Cotton 9363	G. barbadense
M2-10	M210141	Xinhai 13	G. barbadense
M2-11	M210216	Pima 1	G. barbadense
M2-12	M210316	Pingyuan 1	G. barbadense
M2-13	M210341	Yueling 2	G. barbadense
M2-14	M210360	Yueling 1	G. barbadense
M2-15	M210434	E24-3353	G. barbadense
M2-16	M210450	Si-6011	G. barbadense
M2-17	M210480	5536 Fo	G. barbadense
M2-18	M210502	Giza31	G. barbadense
M2-19	M210511	A106	G. barbadense
M2-20	M210517	Basel 1120	G. barbadense
M2-21	M210537	Xinhai 2	G. barbadense
M2-22	M210538	Xinhai 4	G. barbadense
M2-23	M210550	K-7201	G. barbadense
M2-24	M210572	Xinhai 14	G. barbadense
M2-25	M210624	Xinhai 21	G. barbadense
M2-26	M210846	Xinhai 36	G. barbadense
M2-27	M210850	Xinhai 33	G. barbadense
