# Supplementary material for: Development and Characterization of SSR Markers in the Gossypium Barbadense Genome
Source: Research Square preprint supplement (doi:10.21203/rs.3.rs-870780/v1), 2021-09-14
Supplement: Supplementary file 3 [file e7d3990b1f721803eb93f398.xlsx]

## Sheet: Sheet1
Table S2 Frequency of different motifs in the At and Dt sub-genome, and whole genome G. barbadense cv. Xinhai21 genome
Sub genome At		Sub genome Dt		Whole genome
Repeat sequence	Numbers	Repeat sequence	Numbers	Repeat sequence	Numbers
AAT/ATT	7738	AAT/ATT	5132	AAT/ATT	12870
AAAAAT/ATTTTT	5560	AAAAAT/ATTTTT	4056	AAAAAT/ATTTTT	9616
AT/AT	4584	AT/AT	3634	AT/AT	8218
AAAAT/ATTTT	3326	AAAT/ATTT	1992	AAAAT/ATTTT	5188
A/T	3252	AAG/CTT	1966	A/T	4690
AATCAG/ATTCTG	2324	AAAAT/ATTTT	1862	AAAT/ATTT	4074
AAAT/ATTT	2082	AG/CT	1600	AAG/CTT	4015
AAG/CTT	2049	AAAAAG/CTTTTT	1594	AAAAAG/CTTTTT	3609
AAAAAG/CTTTTT	2015	A/T	1438	AG/CT	3272
AG/CT	1672	AAAATT/AATTTT	1064	AATCAG/ATTCTG	2366
AAAATT/AATTTT	1284	AC/GT	827	AAAATT/AATTTT	2348
AC/GT	1018	ATC/ATG	740	AC/GT	1845
AATAT/ATATT	939	ACAT/ATGT	641	ATC/ATG	1510
AACAGT/ACTGTT	801	AAAAG/CTTTT	637	AATAT/ATATT	1483
AAAAG/CTTTT	782	AATCG/ATTCG	605	AAAAG/CTTTT	1419
ATC/ATG	770	AAAATG/ATTTTC	598	AAATT/AATTT	1336
AAATT/AATTT	758	AAATAT/ATATTT	583	ACAT/ATGT	1237
AAATAT/ATATTT	648	AAATT/AATTT	578	AAATAT/ATATTT	1231
ACAT/ATGT	596	AATAT/ATATT	544	AAAATG/ATTTTC	1090
AAAG/CTTT	498	AAC/GTT	468	AACAGT/ACTGTT	918
AAAATG/ATTTTC	492	AATT/AATT	448	AAAG/CTTT	892
AATT/AATT	403	AATTAT/AATTAT	424	AATT/AATT	851
AAATTT/AAATTT	388	AAAG/CTTT	394	AATTAT/AATTAT	807
ACATAT/ATATGT	386	AAATTT/AAATTT	369	AAC/GTT	802
AATTAT/AATTAT	383	AAAAAC/GTTTTT	359	AATCG/ATTCG	777
AAAAAC/GTTTTT	360	ACATAT/ATATGT	338	AAATTT/AAATTT	757
C/G	347	AAAACT/AGTTTT	311	ACATAT/ATATGT	724
AAC/GTT	334	AAAATC/ATTTTG	304	AAAAAC/GTTTTT	719
ACC/GGT	254	AACCCT/AGGGTT	254	AAAATC/ATTTTG	536
AATATT/AATATT	243	AGG/CCT	236	C/G	492
AAAATC/ATTTTG	232	ACC/GGT	234	ACC/GGT	488
AGG/CCT	230	AATATT/AATATT	211	AAAACT/AGTTTT	467
AAATGG/ATTTCC	229	CCCGG/CCGGG	205	AGG/CCT	466
ACAGG/CCTGT	211	AAATGG/ATTTCC	177	AATATT/AATATT	454
AAAAC/GTTTT	194	AAATTG/AATTTC	161	AAATGG/ATTTCC	406
AATTC/AATTG	183	AAAAC/GTTTT	156	AAAAC/GTTTT	350
AATCG/ATTCG	172	AGC/CTG	146	AAATTG/AATTTC	330
AAATTG/AATTTC	169	C/G	145	AACCCT/AGGGTT	321
AAAACT/AGTTTT	156	AAAAGG/CCTTTT	137	AATTC/AATTG	310
AATG/ATTC	146	AAATTC/AATTTG	131	CCCGG/CCGGG	291
AAAAGG/CCTTTT	144	AATTC/AATTG	127	AAAAGG/CCTTTT	281
ATATC/ATATG	143	AAGATG/ATCTTC	125	AGC/CTG	270
AGC/CTG	124	AATG/ATTC	118	AATG/ATTC	264
AAAACC/GGTTTT	123	AACAGT/ACTGTT	117	ATATC/ATATG	254
AAAC/GTTT	114	ATATC/ATATG	111	AAATTC/AATTTG	235
ACACAT/ATGTGT	113	AAGAG/CTCTT	103	AAAC/GTTT	227
AAGGGG/CCCCTT	108	ACT/AGT	100	AAGATG/ATCTTC	224
AGAGGG/CCCTCT	105	AAAACG/CGTTTT	97	AAAACC/GGTTTT	216
AAATTC/AATTTG	104	AACAAT/ATTGTT	97	ACAGG/CCTGT	212
AAGATG/ATCTTC	99	AAGGGG/CCCCTT	94	AAGGGG/CCCCTT	202
AAAGAG/CTCTTT	94	AAAACC/GGTTTT	93	ACT/AGT	187
ACTGAT/AGTATC	93	AAAGAG/CTCTTT	85	AAGAG/CTCTT	186
AATTAG/AATTCT	90	AAGAGG/CCTCTT	73	AAAGAG/CTCTTT	179
ACT/AGT	87	AAATC/ATTTG	71	ACACAT/ATGTGT	174
CCCGG/CCGGG	86	AGATAT/ATATCT	70	AGAGGG/CCCTCT	173
AAATAG/ATTTCT	84	AGAGGG/CCCTCT	68	AACAAT/ATTGTT	167
AAGAG/CTCTT	83	AAATAG/ATTTCT	67	AAATAG/ATTTCT	151
AAGAGG/CCTCTT	75	AACCC/GGGTT	63	AAGAGG/CCTCTT	148
AACAAT/ATTGTT	70	AAAGTG/ACTTTC	62	AGATAT/ATATCT	137
AAAGGG/CCCTTT	69	ACCATC/ATGGTG	62	AAATC/ATTTG	130
AATGC/ATTGC	68	ACACAT/ATGTGT	61	ACTGAT/AGTATC	127
AACCCT/AGGGTT	67	AAACCC/GGGTTT	59	ACCATC/ATGGTG	125
AGATAT/ATATCT	67	AAATGC/ATTTGC	57	AAAGGG/CCCTTT	121
ACAGAT/ATCTGT	66	ACCTCC/AGGTGG	57	AAAACG/CGTTTT	118
CCGGCG/CCGGCG	65	AGGGG/CCCCT	55	AAAAGC/CTTTTG	118
AAAAGC/CTTTTG	63	AAAAGC/CTTTTG	55	AAACCC/GGGTTT	118
AAACAT/ATGTTT	63	AAATG/ATTTC	52	AATTAG/AATTCT	116
AAGGAG/CCTTCT	63	AAAGGG/CCCTTT	52	AACCC/GGGTT	115
ACCATC/ATGGTG	63	AAATCC/ATTTGG	51	ACCTCC/AGGTGG	114
AATAGT/ACTATT	60	AGAT/ATCT	49	AAACAT/ATGTTT	109
AAAGG/CCTTT	59	AATATG/ATATTC	49	AAGGAG/CCTTCT	105
AAATC/ATTTG	59	ACCCG/CGGGT	47	AAAGTG/ACTTTC	102
AAACCC/GGGTTT	59	AATCT/AGATT	46	AAATG/ATTTC	99
ACCTCC/AGGTGG	57	AAACAT/ATGTTT	46	AAATGC/ATTTGC	99
AATCTG/AGATTC	56	ACCGC/CGGTG	44	AGAT/ATCT	97
AAGGT/ACCTT	54	AATATC/ATATTG	44	AAAGG/CCTTT	95
AAAAGT/ACTTTT	54	AAATAC/ATTTGT	43	AAATAC/ATTTGT	95
AACCC/GGGTT	52	AATGAT/ATCATT	43	AAATCC/ATTTGG	95
AAATAC/ATTTGT	52	AAACTT/AAGTTT	42	AATAGT/ACTATT	92
AGGGGG/CCCCCT	52	AAGGAG/CCTTCT	42	AATGC/ATTGC	91
AGAT/ATCT	48	AATCAG/ATTCTG	42	AAAAGT/ACTTTT	91
AAATG/ATTTC	47	AATGGG/ATTCCC	42	ACAGAT/ATCTGT	89
AAACAG/CTGTTT	47	CCG/CGG	41	AATATG/ATATTC	87
AAATCT/AGATTT	47	AAACC/GGTTT	41	AATGAT/ATCATT	85
AAGAAT/ATTCTT	45	AAACAC/GTGTTT	40	AGGGGG/CCCCCT	83
AAATCC/ATTTGG	44	AAAAGT/ACTTTT	37	AATCTG/AGATTC	82
AGATGG/ATCTCC	43	AGAGCC/CTCTGG	37	AAATCT/AGATTT	81
AAATGC/ATTTGC	42	AAAGG/CCTTT	36	ACCCG/CGGGT	79
AATGAT/ATCATT	42	AATGGC/ATTGCC	36	AAACTT/AAGTTT	79
ACCCCC/GGGGGT	41	AATTAC/AATTGT	36	CCG/CGG	78
AAAGTG/ACTTTC	40	AAACTG/AGTTTC	35	AATCT/AGATT	77
AATGGC/ATTGCC	40	AACAAG/CTTGTT	35	AGATGG/ATCTCC	77
AAAGGC/CCTTTG	39	AATACT/AGTATT	35	CCGGCG/CCGGCG	77
AAGCTC/AGCTTG	39	AAATCT/AGATTT	34	AATGGC/ATTGCC	76
AATATG/ATATTC	38	ACTGAT/AGTATC	34	AAGAAT/ATTCTT	75
CCG/CGG	37	AGATGG/ATCTCC	34	AAACC/GGTTT	73
AAACTT/AAGTTT	37	ATCC/ATGG	33	AATATC/ATATTG	70
ACATG/ATGTC	36	AAAGAT/ATCTTT	33	AAACAC/GTGTTT	69
AGGG/CCCT	34	AATAC/ATTGT	32	AAGCTC/AGCTTG	68
AACAGC/CTGTTG	34	AATAGT/ACTATT	32	AACAAG/CTTGTT	66
AATGAG/ATTCTC	33	AAACTC/AGTTTG	31	ACCCCC/GGGGGT	65
AAACC/GGTTT	32	AAAGTT/AACTTT	31	AATTAC/AATTGT	64
ACCCG/CGGGT	32	AGGGGG/CCCCCT	31	ACCGC/CGGTG	63
AAATGT/ACATTT	32	ACG/CGT	30	AAACAG/CTGTTT	63
AACAG/CTGTT	31	AACT/AGTT	30	AATAC/ATTGT	62
AATCT/AGATT	31	AAGAAT/ATTCTT	30	AGGGG/CCCCT	62
AACAAG/CTTGTT	31	AAGCTC/AGCTTG	29	AATGGG/ATTCCC	62
AGGATG/ATCCTC	31	AGGATG/ATCCTC	29	AATACT/AGTATT	60
AACAT/ATGTT	30	AATCAT/ATGATT	28	AGGATG/ATCCTC	60
AAGGG/CCCTT	30	ATGC/ATGC	26	AAACTC/AGTTTG	59
AATAC/ATTGT	30	ATCCC/ATGGG	26	AGAGCC/CTCTGG	59
AAGCTG/AGCTTC	30	AAACCT/AGGTTT	26	AAAGAT/ATCTTT	57
ATGC/ATGC	29	AATCTG/AGATTC	26	AAAGGC/CCTTTG	57
AAACAC/GTGTTT	29	AATTAG/AATTCT	26	AATCAT/ATGATT	57
AACACC/GGTGTT	29	AAACT/AGTTT	24	AATGAG/ATTCTC	57
AATCAT/ATGATT	29	AATGAG/ATTCTC	24	AACAGC/CTGTTG	56
AATGTG/ACATTC	29	ACCCCC/GGGGGT	24	AGGG/CCCT	55
AAACTC/AGTTTG	28	AAGGG/CCCTT	23	ATGC/ATGC	55
AATTAC/AATTGT	28	AATGC/ATTGC	23	AAGGT/ACCTT	55
ACTGCT/AGCAGT	27	AAATGT/ACATTT	23	AAATGT/ACATTT	55
AACCTG/AGGTTC	26	AACTTC/AAGTTG	23	AAGGG/CCCTT	53
AATATC/ATATTG	26	ACAGAT/ATCTGT	23	AAACTG/AGTTTC	53
ATCCCC/ATGGGG	26	ACTCTC/AGAGTG	23	ACG/CGT	51
AATACT/AGTATT	25	AACAGC/CTGTTG	22	AACAT/ATGTT	50
AGCCTC/AGGCTG	25	AACATT/AATGTT	22	AAGCTG/AGCTTC	50
AAAGAT/ATCTTT	24	AAGGTG/ACCTTC	22	ATCC/ATGG	49
AAGCAT/ATGCTT	24	AAGTGG/ACTTCC	22	AAACCT/AGGTTT	49
ACTC/AGTG	23	ATCCCC/ATGGGG	22	AACACC/GGTGTT	48
AAACCT/AGGTTT	23	AGGG/CCCT	21	ATCCCC/ATGGGG	48
AAGCAG/CTGCTT	23	AATCC/ATTGG	21	AACT/AGTT	47
AATCTC/AGATTG	23	AAGCAG/CTGCTT	21	AATGTG/ACATTC	47
ACTCTC/AGAGTG	23	AAGCAT/ATGCTT	21	ACATG/ATGTC	46
AACCCC/GGGGTT	22	ACGGGC/CCCGTG	21	ACTCTC/AGAGTG	46
AGAGCC/CTCTGG	22	AGAGAT/ATCTCT	21	AAACT/AGTTT	45
ACG/CGT	21	AACAT/ATGTT	20	ATCCC/ATGGG	45
AAACT/AGTTT	21	AATGT/ACATT	20	AAGCAT/ATGCTT	45
AAAACG/CGTTTT	21	AAGCTG/AGCTTC	20	AAGCAG/CTGCTT	44
AACATC/ATGTTG	21	ACATGC/ATGTGC	20	AAAGTT/AACTTT	43
AAGTCG/ACTTCG	21	ACTGCC/AGTGGC	20	AACATT/AATGTT	42
AATCAC/ATTGTG	21	AACACC/GGTGTT	19	AACTTC/AAGTTG	42
AGCCTG/AGGCTC	21	AGAGG/CCTCT	18	AATCC/ATTGG	41
AATCC/ATTGG	20	AAAGGC/CCTTTG	18	AAGTGG/ACTTCC	40
AAAGCC/CTTTGG	20	AAAGTC/ACTTTG	18	ACTGCT/AGCAGT	40
AACATT/AATGTT	20	AATGTG/ACATTC	18	AACCTG/AGGTTC	39
AACTCC/AGTTGG	20	AATTCC/AATTGG	18	AAGGTG/ACCTTC	39
AATAGG/ATTCCT	20	ATATGC/ATATGC	18	ACATGC/ATGTGC	38
AATGGG/ATTCCC	20	AATC/ATTG	17	ACTGCC/AGTGGC	38
AATC/ATTG	19	ACATC/ATGTG	17	AGAGAT/ATCTCT	38
ACCGC/CGGTG	19	AACATG/ATGTTC	17	AATCTC/AGATTG	37
ATCCC/ATGGG	19	AACCAC/GGTTGT	17	AGCCTC/AGGCTG	37
AAAGAC/CTTTGT	19	ACCCTC/AGGGTG	17	AATC/ATTG	36
AACTTC/AAGTTG	19	ACGATG/ATCGTC	17	AACCCC/GGGGTT	36
AATGCC/ATTGGC	19	AGGGAT/ATCCCT	17	AATCAC/ATTGTG	36
ACCGCC/CGGTGG	19	ACCCC/GGGGT	16	AACAG/CTGTT	35
ATGCC/ATGGC	18	AAACAG/CTGTTT	16	AATGCC/ATTGGC	35
AAACTG/AGTTTC	18	AATCCC/ATTGGG	16	AATAGG/ATTCCT	34
AAGACT/AGTCTT	18	AATGCC/ATTGGC	16	AATTCC/AATTGG	34
AAGTGG/ACTTCC	18	ACAG/CTGT	15	ACCGCC/CGGTGG	34
ACATGC/ATGTGC	18	AATGG/ATTCC	15	AGCCTG/AGGCTC	34
ACTGCC/AGTGGC	18	ACCTC/AGGTG	15	ACTC/AGTG	33
AGAGGC/CCTCTG	18	ACTAT/AGTAT	15	AATGT/ACATT	33
AACT/AGTT	17	AATACC/ATTGGT	15	AACATG/ATGTTC	33
AACCAG/CTGGTT	17	AATCAC/ATTGTG	15	AATCCC/ATTGGG	33
AAGGTG/ACCTTC	17	ACCACG/CGTGGT	15	ACCACG/CGTGGT	32
AATCCC/ATTGGG	17	ACCGCC/CGGTGG	15	ATATGC/ATATGC	32
ACACCC/GGGTGT	17	ACTCGG/AGTCCG	15	AAAGTC/ACTTTG	31
ACCACG/CGTGGT	17	AGCAGG/CCTGCT	15	AATACC/ATTGGT	31
ACTCCT/AGGAGT	17	AACC/GGTT	14	ACCCTC/AGGGTG	31
AGAGAT/ATCTCT	17	AACCCC/GGGGTT	14	ACTCCT/AGGAGT	31
ATCATG/ATCATG	17	AATAGG/ATTCCT	14	ACTCGG/AGTCCG	31
ATCC/ATGG	16	AATCTC/AGATTG	14	ACATC/ATGTG	30
AACATG/ATGTTC	16	AATGGT/ACCATT	14	AGAGG/CCTCT	30
AATACC/ATTGGT	16	ACCAGC/CTGGTG	14	AAAGAC/CTTTGT	30
AATTCC/AATTGG	16	ACCATG/ATGGTC	14	AAAGCC/CTTTGG	30
ACTCGG/AGTCCG	16	ACTCCT/AGGAGT	14	ACGATG/ATCGTC	30
AGATGC/ATCTGC	16	AAAGC/CTTTG	13	AGGGAT/ATCCCT	30
AGGCAT/ATGCCT	16	AACTG/AGTTC	13	AACATC/ATGTTG	29
AGGCGG/CCGCCT	16	AGATG/ATCTC	13	AACTCC/AGTTGG	29
AACAC/GTGTT	15	AACCTG/AGGTTC	13	AGATGC/ATCTGC	29
AATAG/ATTCT	15	AATGAC/ATTGTC	13	AACC/GGTT	28
ACTCG/AGTCG	15	ACCGTC/ACGGTG	13	ACCTC/AGGTG	28
AGATG/ATCTC	15	ACTGCT/AGCAGT	13	AGATG/ATCTC	28
AACCTC/AGGTTG	15	AGATGC/ATCTGC	13	AACCAC/GGTTGT	28
AACTTG/AAGTTC	15	AGCCAT/ATGGCT	13	AATGGT/ACCATT	28
ACTCCC/AGTGGG	15	AGCCTG/AGGCTC	13	ACGGGC/CCCGTG	28
AGCATC/ATGCTG	15	AGGGGC/CCCCTG	13	AGGCGG/CCGCCT	28
ATATCC/ATATGG	15	ATGCCC/ATGGGC	13	AGGGGC/CCCCTG	27
AACC/GGTT	14	AACCT/AGGTT	12	ATGCC/ATGGC	26
AACTCG/AGTTCG	14	AACACT/AGTGTT	12	AACCTC/AGGTTG	26
AATGGT/ACCATT	14	AACTCG/AGTTCG	12	AACTCG/AGTTCG	26
ACAGTC/ACTGTG	14	AAGGCT/AGCCTT	12	ACCAGC/CTGGTG	26
ACCCTC/AGGGTG	14	AAGTAG/ACTTCT	12	ACCATG/ATGGTC	26
AGCTCC/AGCTGG	14	ACAGAG/CTCTGT	12	ACTCCC/AGTGGG	26
AGGGGC/CCCCTG	14	ACTATC/AGTGAT	12	AGAGGC/CCTCTG	26
ATATGC/ATATGC	14	AGCCTC/AGGCTG	12	AGCAGG/CCTGCT	26
AAAGT/ACTTT	13	AGCTCC/AGCTGG	12	AGCCAT/ATGGCT	26
AACTC/AGTTG	13	AGGCGG/CCGCCT	12	AGCTCC/AGCTGG	26
AATGT/ACATT	13	ATCGCC/ATGGCG	12	ATATCC/ATATGG	26
ACATC/ATGTG	13	CCCGGG/CCCGGG	12	AATAG/ATTCT	25
ACCTC/AGGTG	13	CCGGCG/CCGGCG	12	ACCCC/GGGGT	25
AAAGTC/ACTTTG	13	AACTC/AGTTG	11	ACTAT/AGTAT	25
AAGACG/CGTCTT	13	AGATC/ATCTG	11	AACTTG/AAGTTC	25
AAGATC/ATCTTG	13	AGCCC/CTGGG	11	AAGTAG/ACTTCT	25
AAGGGC/CCCTTG	13	AAAGAC/CTTTGT	11	ACACCC/GGGTGT	25
AAGTAG/ACTTCT	13	AAAGCT/AGCTTT	11	ACTATC/AGTGAT	25
ACAGCC/CTGTGG	13	AACCTC/AGGTTG	11	AGCATC/ATGCTG	25
ACGATG/ATCGTC	13	AAGATT/AATCTT	11	AACAC/GTGTT	24
ACTATC/AGTGAT	13	ACATCT/AGATGT	11	AACTC/AGTTG	24
AGCCAT/ATGGCT	13	ACCACT/AGTGGT	11	AAGTCG/ACTTCG	24
AGGGAT/ATCCCT	13	ACTCCC/AGTGGG	11	AGGCAT/ATGCCT	24
ATCGGC/ATGCCG	13	ATATCC/ATATGG	11	ACAG/CTGT	23
AAGCC/CTTGG	12	ACCC/GGGT	10	AATGG/ATTCC	23
AGAGG/CCTCT	12	ACTC/AGTG	10	AACCAG/CTGGTT	23
AAAGTT/AACTTT	12	AGGC/CCTG	10	AAGGCT/AGCCTT	23
AACCAT/ATGGTT	12	AATAG/ATTCT	10	ACAGAG/CTCTGT	23
AATCCT/AGGATT	12	ACATG/ATGTC	10	ATCATG/ATCATG	23
ACACGC/CGTGTG	12	ACCAT/ATGGT	10	AAAGC/CTTTG	22
ACCAGC/CTGGTG	12	AGAGC/CTCTG	10	ACTCG/AGTCG	22
ACCATG/ATGGTC	12	AGCAT/ATGCT	10	AATGAC/ATTGTC	22
AACCAC/GGTTGT	11	AAAGCC/CTTTGG	10	ACAGCC/CTGTGG	22
AAGGCT/AGCCTT	11	AACTTG/AAGTTC	10	AAAGT/ACTTT	21
ACAGAG/CTCTGT	11	AAGCAC/CTTGTG	10	AAGCC/CTTGG	21
ACAGGC/CCTGTG	11	AATAGC/ATTGCT	10	AATCCT/AGGATT	21
ACATGG/ATGTCC	11	AATGCT/AGCATT	10	ACACGC/CGTGTG	21
ACGGCG/CCGTCG	11	ACAGTG/ACTGTC	10	ACATGG/ATGTCC	21
AGCAGG/CCTGCT	11	ACATGG/ATGTCC	10	ATGCCC/ATGGGC	21
AGCCCG/CGGGCT	11	AGCATC/ATGCTG	10	AAGACT/AGTCTT	20
AAGG/CCTT	10	AAGG/CCTT	9	AAGATC/ATCTTG	20
ACTAT/AGTAT	10	AACAC/GTGTT	9	AAGCAC/CTTGTG	20
AAATCG/ATTTCG	10	AAGCC/CTTGG	9	AATAGC/ATTGCT	20
AAGCAC/CTTGTG	10	AAATCG/ATTTCG	9	AATGCT/AGCATT	20
AATAGC/ATTGCT	10	AACTCC/AGTTGG	9	ACATCT/AGATGT	20
AATGCT/AGCATT	10	AAGGCC/CCTTGG	9	ACCACT/AGTGGT	20
AATTGC/AATTGC	10	AATCCT/AGGATT	9	AAGG/CCTT	19
ACATGT/ACATGT	10	ACACGC/CGTGTG	9	AGGC/CCTG	19
ACCTCT/AGAGGT	10	ACAGCC/CTGTGG	9	AAAGCT/AGCTTT	19
AGATCC/ATCTGG	10	ACCTCG/AGGTCG	9	AAATCG/ATTTCG	19
AGCCCC/CTGGGG	10	ACCTCT/AGAGGT	9	AAGACG/CGTCTT	19
AGCGGC/CCGCTG	10	ACCTGC/AGGTGC	9	ACCTCT/AGAGGT	19
AGGC/CCTG	9	ACTGAG/AGTCTC	9	AGCCCG/CGGGCT	19
AAAGC/CTTTG	9	AAAGT/ACTTT	8	ACCAT/ATGGT	18
ACCCC/GGGGT	9	AACCG/CGGTT	8	AGATC/ATCTG	18
AAGCCC/CTTGGG	9	AAGGC/CCTTG	8	AGCCC/CTGGG	18
AATGAC/ATTGTC	9	ACTCC/AGTGG	8	AACCAT/ATGGTT	18
AATGTC/ACATTG	9	ATGCC/ATGGC	8	AAGATT/AATCTT	18
ACACTC/AGTGTG	9	AACATC/ATGTTG	8	AGCCCC/CTGGGG	18
ACATCT/AGATGT	9	AACCCG/CGGGTT	8	AGCGGC/CCGCTG	18
ACCACT/AGTGGT	9	AACTGC/AGTTGC	8	CCCGGG/CCCGGG	18
ACCCAG/CTGGGT	9	AACTGG/AGTTCC	8	ACCC/GGGT	17
ACAG/CTGT	8	ACACCC/GGGTGT	8	AACCT/AGGTT	17
AATGG/ATTCC	8	AGAGGC/CCTCTG	8	AACTG/AGTTC	17
ACCAG/CTGGT	8	AGCCCC/CTGGGG	8	AACACT/AGTGTT	17
ACCAT/ATGGT	8	AGCCCG/CGGGCT	8	AAGGGC/CCCTTG	17
ACTCC/AGTGG	8	AGCGGC/CCGCTG	8	AATTGC/AATTGC	17
AAAGCT/AGCTTT	8	AGGCAT/ATGCCT	8	ACAGGC/CCTGTG	17
AACCTT/AAGGTT	8	ACTCG/AGTCG	7	ACAGTC/ACTGTG	17
AACTGC/AGTTGC	8	AAGATC/ATCTTG	7	ACCGTC/ACGGTG	17
AACTGT/ACAGTT	8	AAGCCC/CTTGGG	7	ACCTCG/AGGTCG	17
AAGGAT/ATCCTT	8	AAGGAT/ATCCTT	7	ACGGCG/CCGTCG	17
AAGTCC/ACTTGG	8	AAGTAC/ACTTGT	7	ATCGGC/ATGCCG	17
AAGTGT/ACACTT	8	AAGTAT/ACTTAT	7	ACTCC/AGTGG	16
ACACAG/CTGTGT	8	AAGTCC/ACTTGG	7	AACTGC/AGTTGC	16
ACAGGT/ACCTGT	8	AATTGC/AATTGC	7	AAGCCC/CTTGGG	16
ACCCAT/ATGGGT	8	ACACGG/CCGTGT	7	ACACTC/AGTGTG	16
ACCTCG/AGGTCG	8	ACACTC/AGTGTG	7	ATCGCC/ATGGCG	16
ACGCAG/CGTCTG	8	ACCCCT/AGGGGT	7	AACCCG/CGGGTT	15
ACTCAT/AGTATG	8	ACGAGC/CGTGCT	7	AAGGAT/ATCCTT	15
AGCATG/ATGCTC	8	ACGAGG/CCTCGT	7	AAGGCC/CCTTGG	15
ATGCCC/ATGGGC	8	ACTATG/AGTCAT	7	AAGTCC/ACTTGG	15
AGCC/CTGG	7	AGCC/CTGG	6	AATGTC/ACATTG	15
ACCC/GGGT	7	AAGTC/ACTTG	6	ACCTGC/AGGTGC	15
AGATC/ATCTG	7	AACCAG/CTGGTT	6	ACTGAG/AGTCTC	15
AGCCC/CTGGG	7	AACCAT/ATGGTT	6	AGATCC/ATCTGG	15
AGGGG/CCCCT	7	AACCTT/AAGGTT	6	AGAGC/CTCTG	14
AACCCG/CGGGTT	7	AAGACG/CGTCTT	6	AACCTT/AAGGTT	14
AACGGT/ACCGTT	7	AAGTGC/ACTTGC	6	AACTGG/AGTTCC	14
AACTAC/AGTTGT	7	AATGTC/ACATTG	6	ACAGGT/ACCTGT	14
AACTAG/AGTTCT	7	ACAGGC/CCTGTG	6	AGCATG/ATGCTC	14
AAGAGC/CTCTTG	7	ACAGGT/ACCTGT	6	AGCC/CTGG	13
AAGATT/AATCTT	7	ACATCC/ATGTGG	6	AACTGT/ACAGTT	13
ACGGGC/CCCGTG	7	ACCCGC/CGGGTG	6	ACAGTG/ACTGTC	13
ACTCTG/AGAGTC	7	ACGGCG/CCGTCG	6	ACATGT/ACATGT	13
AGCCGG/CCGGCT	7	AGCATG/ATGCTC	6	AAGGC/CCTTG	12
AGGCCT/AGGCCT	7	AGCTGC/AGCTGC	6	ACCAG/CTGGT	12
AACTT/AAGTT	6	ATCATG/ATCATG	6	AGCAT/ATGCT	12
AGCCT/AGGCT	6	AAGAT/ATCTT	5	AACTAC/AGTTGT	12
CCCCG/CGGGG	6	AAGCT/AGCTT	5	AAGTAT/ACTTAT	12
AAAGGT/ACCTTT	6	ACTGC/AGTGC	5	ACACAG/CTGTGT	12
AACTGG/AGTTCC	6	AGGAT/ATCCT	5	ACACGG/CCGTGT	12
AAGCCT/AGGCTT	6	AACCGC/CGGTTG	5	ACATCC/ATGTGG	12
AAGGCC/CCTTGG	6	AACCGG/CCGGTT	5	ACCCCT/AGGGGT	12
AAGGGT/ACCCTT	6	AACCGT/ACGGTT	5	AAGCCT/AGGCTT	11
AAGGTC/ACCTTG	6	AACGAC/CGTTGT	5	AAGGGT/ACCCTT	11
ACATCC/ATGTGG	6	AACTAC/AGTTGT	5	AAGTAC/ACTTGT	11
ACCGAG/CGGTCT	6	AACTAT/AGTTAT	5	AAGTGC/ACTTGC	11
ACCTGC/AGGTGC	6	AACTGT/ACAGTT	5	AAGTGT/ACACTT	11
ACTCAG/AGTCTG	6	AAGACC/CTTGGT	5	ACTATG/AGTCAT	11
ACTGAG/AGTCTC	6	AAGCCT/AGGCTT	5	ACTCAG/AGTCTG	11
AGATCG/ATCTCG	6	AAGGGT/ACCCTT	5	ACTCAT/AGTATG	11
CCCGGG/CCCGGG	6	ACATAG/ATGTCT	5	AACCG/CGGTT	10
AAGC/CTTG	5	ACCAGT/ACTGGT	5	AAGCT/AGCTT	10
AACCT/AGGTT	5	ACTAGT/ACTAGT	5	AGGAT/ATCCT	10
AAGCT/AGCTT	5	ACTCAG/AGTCTG	5	AAAGGT/ACCTTT	10
ACCTG/AGGTC	5	AGATCC/ATCTGG	5	AACTAT/AGTTAT	10
AGGAT/ATCCT	5	AGCTCG/AGCTCG	5	AAGAGC/CTCTTG	10
ATCCG/ATCGG	5	AGGCCG/CCTCGG	5	AAGGTC/ACCTTG	10
AACACT/AGTGTT	5	AAGC/CTTG	4	ACCCAG/CTGGGT	10
AACGCC/CGTTGG	5	AAGT/ACTT	4	ACCCAT/ATGGGT	10
AACTAT/AGTTAT	5	ACCT/AGGT	4	ACCCGC/CGGGTG	10
AAGCCG/CGGCTT	5	ACGC/CGTG	4	ACGAGC/CGTGCT	10
AAGTAT/ACTTAT	5	ACTG/AGTC	4	ACGAGG/CCTCGT	10
AAGTCT/ACTTAG	5	AGCT/AGCT	4	AGCCGG/CCGGCT	10
AAGTGC/ACTTGC	5	AACAG/CTGTT	4	AGCTCG/AGCTCG	10
ACACGG/CCGTGT	5	AAGAC/CTTGT	4	AAGC/CTTG	9
ACAGGG/CCCTGT	5	ACACC/GGTGT	4	AAGAT/ATCTT	9
ACCCCT/AGGGGT	5	ACCAG/CTGGT	4	AAGTC/ACTTG	9
ACCTAG/AGGTCT	5	ACTAG/AGTCT	4	ACTGC/AGTGC	9
ACTAGC/AGTGCT	5	AAAGGT/ACCTTT	4	AGCCT/AGGCT	9
ACTAGG/AGTCCT	5	AACGGC/CCGTTG	4	AACTAG/AGTTCT	9
AGCCCT/AGGGCT	5	AAGCGG/CCGCTT	4	ACCGAG/CGGTCT	9
AGCTCG/AGCTCG	5	AAGGAC/CCTTGT	4	ACGCAG/CGTCTG	9
ATCCCG/ATCGGG	5	AAGGCG/CCTTCG	4	ACTCTG/AGAGTC	9
ATGGCC/ATGGCC	5	AAGGGC/CCCTTG	4	AGCTGC/AGCTGC	9
CG/CG	4	AAGGTC/ACCTTG	4	ACGC/CGTG	8
ACTG/AGTC	4	AATCCG/ATTCGG	4	ACTG/AGTC	8
ACGC/CGTG	4	ACACAG/CTGTGT	4	AACTT/AAGTT	8
AAACG/CGTTT	4	ACCGCG/CGCGGT	4	AAGAC/CTTGT	8
AACTG/AGTTC	4	ATCGGC/ATGCCG	4	ATCCG/ATCGG	8
AAGAC/CTTGT	4	CCCCCG/CGGGGG	4	AACCGC/CGGTTG	8
AAGAT/ATCTT	4	AACGG/CCGTT	3	AACCGG/CCGGTT	8
AAGGC/CCTTG	4	AAGTG/ACTTC	3	AACCGT/ACGGTT	8
AAGTG/ACTTC	4	ACAGC/CTGTG	3	AACGGC/CCGTTG	8
ACTGC/AGTGC	4	ACTCT/AGAGT	3	AAGCGG/CCGCTT	8
AGAGC/CTCTG	4	AGCCT/AGGCT	3	AAGGAC/CCTTGT	8
AGGGC/CCCTG	4	AGGGC/CCCTG	3	AATCCG/ATTCGG	8
AACAGG/CCTGTT	4	ATCCG/ATCGG	3	ACTAGC/AGTGCT	8
AACGGC/CCGTTG	4	AAACGC/CGTTTG	3	ACTAGT/ACTAGT	8
AAGCGG/CCGCTT	4	AACTCT/AGAGTT	3	AGCCCT/AGGGCT	8
AAGCTT/AAGCTT	4	AAGAGC/CTCTTG	3	AGGCCG/CCTCGG	8
AAGGAC/CCTTGT	4	AAGAGT/ACTCTT	3	AGGCCT/AGGCCT	8
AAGTAC/ACTTGT	4	AAGTCG/ACTTCG	3	ATGGCC/ATGGCC	8
AATCCG/ATTCGG	4	AAGTGT/ACACTT	3	AGCT/AGCT	7
ACACCT/AGGTGT	4	ACACCT/AGGTGT	3	AAGTG/ACTTC	7
ACATCG/ATGTCG	4	ACAGTC/ACTGTG	3	ACACC/GGTGT	7
ACCCGC/CGGGTG	4	ACATGT/ACATGT	3	ACCTG/AGGTC	7
ACCCGT/ACGGGT	4	ACCGAG/CGGTCT	3	AGGGC/CCCTG	7
ACCGGC/CCGGTG	4	ACGGAG/CCGTCT	3	AACGAC/CGTTGT	7
ACCGTC/ACGGTG	4	ACGGCC/CCGTGG	3	AACGCC/CGTTGG	7
ACGTCC/ACGTGG	4	ACGTCC/ACGTGG	3	AACGGT/ACCGTT	7
ACTATG/AGTCAT	4	ACTAGC/AGTGCT	3	AAGACC/CTTGGT	7
ACTCCG/AGTCGG	4	ACTCAT/AGTATG	3	AAGCCG/CGGCTT	7
AGAGCG/CGCTCT	4	ACTGGG/AGTCCC	3	AAGTCT/ACTTAG	7
AGCCGC/CGGCTG	4	AGCCCT/AGGGCT	3	ACACCT/AGGTGT	7
ATCGCC/ATGGCG	4	AGCCGG/CCGGCT	3	ACAGGG/CCCTGT	7
AGCT/AGCT	3	AGGCCC/CCTGGG	3	ACCAGT/ACTGGT	7
AACGT/ACGTT	3	ATGGCC/ATGGCC	3	ACGTCC/ACGTGG	7
AAGTC/ACTTG	3	AACGC/CGTTG	2	AGATCG/ATCTCG	7
ACACC/GGTGT	3	AACTT/AAGTT	2	CCCCG/CGGGG	6
ACACT/AGTGT	3	ACAGT/ACTGT	2	AAGAGT/ACTCTT	6
ACCCT/AGGGT	3	ACCGG/CCGGT	2	ACATAG/ATGTCT	6
ACGCC/CGTGG	3	ACCTG/AGGTC	2	ACCCGT/ACGGGT	6
AGCTC/AGCTG	3	ACGCC/CGTGG	2	ACCGCG/CGCGGT	6
AAACGT/ACGTTT	3	AGCTC/AGCTG	2	ACCGGC/CCGGTG	6
AAAGCG/CGCTTT	3	AGGCG/CCTCG	2	ACCTAG/AGGTCT	6
AACACG/CGTGTT	3	ATCGC/ATGCG	2	ACGGAG/CCGTCT	6
AACCGC/CGGTTG	3	AAACCG/CGGTTT	2	ACTCCG/AGTCGG	6
AACCGG/CCGGTT	3	AAAGCG/CGCTTT	2	AGCCGC/CGGCTG	6
AACCGT/ACGGTT	3	AACGAT/ATCGTT	2	ATCCCG/ATCGGG	6
AAGAGT/ACTCTT	3	AACGCC/CGTTGG	2	CG/CG	5
AATCGG/ATTCCG	3	AACGTG/ACGTTC	2	ACCT/AGGT	5
AATTCG/AATTCG	3	AACTAG/AGTTCT	2	AAACG/CGTTT	5
ACAGTG/ACTGTC	3	AAGACT/AGTCTT	2	AACGG/CCGTT	5
ACCCCG/CGGGGT	3	AAGCCG/CGGCTT	2	ACAGC/CTGTG	5
ACCCTG/AGGGTC	3	AAGTCT/ACTTAG	2	ACGCC/CGTGG	5
ACCGTG/ACGGTC	3	AATGCG/ATTCGC	2	ACTAG/AGTCT	5
ACGAGC/CGTGCT	3	AATTCG/AATTCG	2	AGCTC/AGCTG	5
ACGAGG/CCTCGT	3	ACACCG/CGGTGT	2	AAACGC/CGTTTG	5
ACGCCG/CGGCGT	3	ACACGT/ACGTGT	2	AAAGCG/CGCTTT	5
ACGCTC/AGCGTG	3	ACACTG/AGTGTC	2	AACAGG/CCTGTT	5
ACGGAG/CCGTCT	3	ACAGGG/CCCTGT	2	AACTCT/AGAGTT	5
ACGGAT/ATCCGT	3	ACCAGG/CCTGGT	2	AAGCTT/AAGCTT	5
ACTAGT/ACTAGT	3	ACCCAT/ATGGGT	2	AAGGCG/CCTTCG	5
AGAGCT/AGCTCT	3	ACCCCG/CGGGGT	2	AATTCG/AATTCG	5
AGATCT/AGATCT	3	ACCCGG/CCGGGT	2	ACATCG/ATGTCG	5
AGCTGC/AGCTGC	3	ACCCGT/ACGGGT	2	ACCCCG/CGGGGT	5
AGGCCG/CCTCGG	3	ACCGGC/CCGGTG	2	ACGCTC/AGCGTG	5
AGGGCG/CCCTCG	3	ACCTAT/AGGTAT	2	ACTAGG/AGTCCT	5
ACGT/ACGT	2	ACGCCT/AGGCGT	2	ACTGGG/AGTCCC	5
AACCG/CGGTT	2	ACGCTC/AGCGTG	2	AGAGCG/CGCTCT	5
AACGG/CCGTT	2	ACGTAT/ACGTAT	2	AGGCCC/CCTGGG	5
ACACG/CGTGT	2	ACTCCG/AGTCGG	2	CCCCCG/CGGGGG	5
ACAGC/CTGTG	2	ACTCTG/AGAGTC	2	AAGT/ACTT	4
ACCGG/CCGGT	2	ACTGCG/AGTCGC	2	ACACT/AGTGT	4
AGCAT/ATGCT	2	ACTGGC/AGTGCC	2	ACCCT/AGGGT	4
AGCCG/CGGCT	2	AGCCGC/CGGCTG	2	ACCGG/CCGGT	4
AGGCG/CCTCG	2	AGCGGG/CCCGCT	2	ACTCT/AGAGT	4
ATCGC/ATGCG	2	CCCCGG/CCGGGG	2	AGGCG/CCTCG	4
AAACGC/CGTTTG	2	CG/CG	1	ATCGC/ATGCG	4
AAACGG/CCGTTT	2	AACG/CGTT	1	AAACGT/ACGTTT	4
AACGAC/CGTTGT	2	ACGT/ACGT	1	AACACG/CGTGTT	4
AACGAG/CGTTCT	2	AGCG/CGCT	1	AATCGG/ATTCCG	4
AACGCT/AGCGTT	2	ATCG/ATCG	1	ACACCG/CGGTGT	4
AACTCT/AGAGTT	2	AAACG/CGTTT	1	ACACTG/AGTGTC	4
AAGACC/CTTGGT	2	AAGGT/ACCTT	1	ACCCTG/AGGGTC	4
AATCGC/ATTGCG	2	ACACT/AGTGT	1	ACCGTG/ACGGTC	4
AATCGT/ACGATT	2	ACAGG/CCTGT	1	ACCTAT/AGGTAT	4
ACACCG/CGGTGT	2	ACCCT/AGGGT	1	ACGCCG/CGGCGT	4
ACACTG/AGTGTC	2	ACGAT/ATCGT	1	ACGGAT/ATCCGT	4
ACCAGT/ACTGGT	2	ACGTC/ACGTG	1	ACTGCG/AGTCGC	4
ACCGCG/CGCGGT	2	ACTGG/AGTCC	1	ACTGGC/AGTGCC	4
ACCTAT/AGGTAT	2	AGCCG/CGGCT	1	AGCGGG/CCCGCT	4
ACGACT/AGTCGT	2	AGCGG/CCGCT	1	AGGGCG/CCCTCG	4
ACGCCC/CGTGGG	2	AAACGG/CCGTTT	1	CCCCGG/CCGGGG	4
ACGGGG/CCCCGT	2	AAACGT/ACGTTT	1	ACGT/ACGT	3
ACTGCG/AGTCGC	2	AACACG/CGTGTT	1	AACGT/ACGTT	3
ACTGGC/AGTGCC	2	AACAGG/CCTGTT	1	ACAGT/ACTGT	3
ACTGGG/AGTCCC	2	AACGAG/CGTTCT	1	AGCCG/CGGCT	3
AGCGGG/CCCGCT	2	AACGCT/AGCGTT	1	AAACGG/CCGTTT	3
AGCTAT/AGCTAT	2	AACGGG/CCCGTT	1	AACGAG/CGTTCT	3
AGGCCC/CCTGGG	2	AAGCGC/CGCTTG	1	AACGCT/AGCGTT	3
ATCCGC/ATGCGG	2	AAGCGT/ACGCTT	1	AACGTG/ACGTTC	3
CCCCGG/CCGGGG	2	AAGCTT/AAGCTT	1	AATCGC/ATTGCG	3
CCCGCG/CGCGGG	2	AATACG/ATTCGT	1	AATCGT/ACGATT	3
CCGG/CCGG	1	AATCGC/ATTGCG	1	AATGCG/ATTCGC	3
ATCG/ATCG	1	AATCGG/ATTCCG	1	ACCAGG/CCTGGT	3
AGCG/CGCT	1	AATCGT/ACGATT	1	ACCCGG/CCGGGT	3
ACGG/CCGT	1	ACAGCT/AGCTGT	1	ACGACT/AGTCGT	3
ACCT/AGGT	1	ACATCG/ATGTCG	1	ACGCCC/CGTGGG	3
ACCG/CGGT	1	ACCCAG/CTGGGT	1	ACGGCC/CCGTGG	3
AAGCG/CGCTT	1	ACCCTG/AGGGTC	1	ACGGGG/CCCCGT	3
ACAGT/ACTGT	1	ACCGGG/CCCGGT	1	ACGTAT/ACGTAT	3
ACGAT/ATCGT	1	ACCGTG/ACGGTC	1	AGAGCT/AGCTCT	3
ACGGC/CCGTG	1	ACCTAG/AGGTCT	1	AGATCT/AGATCT	3
ACTAG/AGTCT	1	ACGACT/AGTCGT	1	CCCGCG/CGCGGG	3
ACTCT/AGAGT	1	ACGATC/ATCGTG	1	AGCG/CGCT	2
ACTGG/AGTCC	1	ACGCAG/CGTCTG	1	ATCG/ATCG	2
AGGCC/CCTGG	1	ACGCCC/CGTGGG	1	AACGC/CGTTG	2
AACGGG/CCCGTT	1	ACGCCG/CGGCGT	1	ACACG/CGTGT	2
AACGTG/ACGTTC	1	ACGCGC/CGCGTG	1	ACGAT/ATCGT	2
AAGCGT/ACGCTT	1	ACGGAT/ATCCGT	1	ACTGG/AGTCC	2
AAGGCG/CCTTCG	1	ACGGCT/AGCCGT	1	AAACCG/CGGTTT	2
AATGCG/ATTCGC	1	ACGGGG/CCCCGT	1	AACGAT/ATCGTT	2
ACAGCG/CGCTGT	1	ACTCGC/AGTGCG	1	AACGGG/CCCGTT	2
ACAGCT/AGCTGT	1	AGAGCG/CGCTCT	1	AAGCGT/ACGCTT	2
ACATAG/ATGTCT	1	AGATCG/ATCTCG	1	ACACGT/ACGTGT	2
ACCAGG/CCTGGT	1	AGCGAT/ATCGCT	1	ACAGCT/AGCTGT	2
ACCCGG/CCGGGT	1	AGGCCT/AGGCCT	1	ACGCCT/AGGCGT	2
ACCGAT/ATCGGT	1	AGGGCC/CCCTGG	1	ACGCGC/CGCGTG	2
ACGCAT/ATGCGT	1	AGGGCG/CCCTCG	1	ACGGCT/AGCCGT	2
ACGCGC/CGCGTG	1	ATATCG/ATATCG	1	ACTCGC/AGTGCG	2
ACGCTG/AGCGTC	1	ATCCCG/ATCGGG	1	AGCTAT/AGCTAT	2
ACGGCT/AGCCGT	1	ATCCGG/ATCCGG	1	AGGGCC/CCCTGG	2
ACGTAT/ACGTAT	1	CCCGCG/CGCGGG	1	ATATCG/ATATCG	2
ACGTGC/ACGTGC	1			ATCCGC/ATGCGG	2
ACTCGC/AGTGCG	1			AACG/CGTT	1
AGCGCC/CGCTGG	1			ACCG/CGGT	1
AGGATC/ATCCTG	1			ACGG/CCGT	1
AGGGCC/CCCTGG	1			CCGG/CCGG	1
ATATCG/ATATCG	1			AAGCG/CGCTT	1
CCCCCG/CGGGGG	1			ACGGC/CCGTG	1
				ACGTC/ACGTG	1
				AGCGG/CCGCT	1
				AGGCC/CCTGG	1
				AAGCGC/CGCTTG	1
				AATACG/ATTCGT	1
				ACAGCG/CGCTGT	1
				ACCGAT/ATCGGT	1
				ACCGGG/CCCGGT	1
				ACGATC/ATCGTG	1
				ACGCAT/ATGCGT	1
				ACGCTG/AGCGTC	1
				ACGTGC/ACGTGC	1
				AGCGAT/ATCGCT	1
				AGCGCC/CGCTGG	1
				AGGATC/ATCCTG	1
				ATCCGG/ATCCGG	1
